# Supplementary material for: Proteomic Changes Resulting from Gene Copy Number Variations in Cancer Cells
Source: PLoS Genet. 2010 Sep 2;6(9):e1001090. doi: 10.1371/journal.pgen.1001090 (PMC2932691; doi:10.1371/journal.pgen.1001090)
Supplement: Table S3 — Amplified and deleted genes and matching changing proteins. (0.16 MB XLS) [file pgen.1001090.s005.xls]

## Sheet: amp 2218
Table S3: Amplified and deleted genes and matching changing proteins. (A) Amplified genes in HCC2218 cells of which the protein levels are either two-fold up or down-regulated.
Gene Names	Protein Names	Protein IDs	Chromosome	Position	Log2 Ratio HCC2218/HMEC protein	Log2 Ratio HCC2218/HMEC Copy number
EML1	Echinoderm microtubule-associated protein-like 1	IPI00550611;IPI00334011;IPI00004582	14	100259745	7.7103	0.684216
SELENBP1	Selenium-binding protein 1	IPI00943000;IPI00012303;IPI00942368;IPI00852838;IPI00852768;IPI00030385;IPI00853528;IPI00892906;IPI00852953;IPI00893579	1	151336778	7.19434	1.15061
SLC9A3R1	Na(+)/H(+) exchange regulatory cofactor NHE-RF1	IPI00003527;IPI00794755;IPI00902652;IPI00020904;IPI00647477	17	72744763	5.93615	2.3687
ERBB2	Receptor tyrosine-protein kinase erbB-2	IPI00300384;IPI00845478;IPI00941360;IPI00384288;IPI00179189;IPI00008115;IPI00295401;IPI00000977	17	37844393	5.75835	2.29786
LLGL2	Lethal(2) giant larvae protein homolog 2	IPI00465050;IPI00641801;IPI00555972	17	73521783	5.39236	2.1704
RSAD1	Radical S-adenosyl methionine domain-containing protein 1, mitochondrial	IPI00550335;IPI00910968	17	48556190	4.95897	2.28979
ACSF2	cDNA FLJ51819, weakly similar to Long-chain-fatty-acid--CoA ligase (EC 6.2.1.3)	IPI00909579;IPI00304071	17	48503519	4.67689	2.33971
TMEM63A	Transmembrane protein 63A	IPI00006006;IPI00646598	1	226033237	4.44659	1.1774
PREX1	Phosphatidylinositol 3,4,5-trisphosphate-dependent Rac exchanger 1 protein	IPI00295252;IPI00552692;IPI00218429	20	47240790	4.41065	0.658752
SLC25A29	Mitochondrial carnitine/acylcarnitine carrier protein CACL	IPI00184708	14	100757448	4.29343	0.606171
SYNGR2	SYNGR2 protein	IPI00654744;IPI00013946;IPI00789763;IPI00793573;IPI00791822	17	76164671	4.04127	0.912424
SLC25A19	Mitochondrial thiamine pyrophosphate carrier	IPI00028068;IPI00433339;IPI00793293	17	73269062	4.02163	2.10065
CALCOCO2	cDNA FLJ51790, highly similar to Homo sapiens nuclear domain 10 protein (NDP52), mRNA	IPI00910883;IPI00743360;IPI00908968;IPI00797191;IPI00794330	17	46908372	3.90968	2.8982
C8orf55	UPF0670 protein C8orf55	IPI00171421;IPI00791754	8	143808621	3.90781	0.884951
PPP1R9B	Neurabin-2	IPI00045550	17	48211104	3.7876	2.06952
FDXR	cDNA FLJ53329, highly similar to NADPH:adrenodoxin oxidoreductase, mitochondrial (EC 1.18.1.2)	IPI00911050;IPI00026958;IPI00221118;IPI00910128;IPI00903185	17	72858623	3.74218	2.08046
GRB7	Growth factor receptor-bound protein 7	IPI00939546;IPI00448767;IPI00902705;IPI00293948;IPI00789815;IPI00791383	17	37894187	3.72569	1.83414
COX6C	Cytochrome c oxidase subunit 6C	IPI00015972	8	100890372	3.49874	1.05248
FLAD1	FAD synthetase	IPI00220299;IPI00642864;IPI00398214;IPI00641224;IPI00855871;IPI00387088;IPI00644201;IPI00060574	1	154955814	3.34991	1.22305
C1orf69	Putative transferase C1orf69, mitochondrial	IPI00145260	1	228353516	3.34039	1.36561
MYST2	Histone acetyltransferase MYST2	IPI00180764;IPI00792061;IPI00909397;IPI00909215;IPI00607795;IPI00103685	17	47866058	3.26432	1.87856
PARP1	Poly [ADP-ribose] polymerase 1	IPI00449049;IPI00896487;IPI00478427;IPI00477173	1	226548392	3.26264	1.67921
MAL2	Protein MAL2	IPI00056414;IPI00941173	8	120220610	3.26173	1.06508
PTRH2	cDNA FLJ32471 fis, clone SKNMC2000322, highly similar to Peptidyl-tRNA hydrolase 2, mitochondrial (EC 3.1.1.29)	IPI00555597;IPI00032903	17	57774667	3.25396	2.13348
MIA3	Melanoma inhibitory activity protein 3	IPI00455473;IPI00739902;IPI00942436;IPI00655578;IPI00741107;IPI00929251;IPI00718836	1	222791428	3.12708	1.3912
PLEKHF2	Pleckstrin homology domain-containing family F member 2	IPI00002424	8	96146032	3.06878	1.16966
SPATA20	Spermatogenesis-associated protein 20	IPI00154567;IPI00335497;IPI00827778;IPI00828067;IPI00908737;IPI00816652	17	48624555	3.05675	2.21609
KIAA0100	UPF0378 protein KIAA0100	IPI00373894;IPI00784567;IPI00784975;IPI00787005	17	26941459	2.96013	0.917984
UBE2Z	Ubiquitin-conjugating enzyme E2 Z	IPI00011996;IPI00829749	17	46985731	2.95027	2.92682
C5orf33	UPF0465 protein C5orf33	IPI00845432;IPI00431405;IPI00922892;IPI00654793	5	36192694	2.8992	0.830069
LGALS8	Galectin-8	IPI00165587;IPI00215644;IPI00874257;IPI00010844;IPI00645902;IPI00646437;IPI00479062;IPI00514654;IPI00645350;IPI00909243;IPI00644218	1	236681300	2.83236	0.98846
PYCR2	Pyrroline-5-carboxylate reductase 2	IPI00470610;IPI00747534;IPI00908985;IPI00642541;IPI00335061;IPI00514380	1	226074773	2.81249	1.24588
CGN	Cingulin	IPI00844508;IPI00929635;IPI00852984;IPI00797763;IPI00915752;IPI00744509	1	151483863	2.79373	1.29031
TRPS1	Zinc finger transcription factor Trps1	IPI00853099;IPI00937887;IPI00296078	8	116420724	2.78914	1.03076
HEATR6	HEAT repeat-containing protein 6	IPI00464999;IPI00784697	17	58120562	2.78051	3.0851
SUMO2	Small ubiquitin-related modifier 2	IPI00299149;IPI00140827;IPI00745893;IPI00936162;IPI00936160;IPI00790142;IPI00640611;IPI00827816;IPI00434968	21	46191374	2.77334	1.78915
TDRKH	Tudor and KH domain-containing protein	IPI00009982;IPI00410251;IPI00642210;IPI00922525	1	151744050	2.76804	1.21956
LRRC59	Leucine-rich repeat-containing protein 59	IPI00396321	17	48458600	2.7296	2.26044
RECQL5	ATP-dependent DNA helicase Q5	IPI00185769;IPI00220820;IPI00220819;IPI00940172	17	73622933	2.72888	2.15835
VPS13B	Vacuolar protein sorting-associated protein 13B	IPI00376439;IPI00420061;IPI00376437;IPI00376436;IPI00376435;IPI00941724	8	100025494	2.68736	1.05764
ZNF217	Zinc finger protein 217	IPI00025310	20	52183604	2.67869	0.599691
ACP6	Lysophosphatidic acid phosphatase type 6	IPI00099838;IPI00556344	1	147119170	2.67496	1.13634
TMEM70	Transmembrane protein 70, mitochondrial	IPI00106966;IPI00787239;IPI00759624	8	74888430	2.66777	0.930379
TMEM49	Transmembrane protein 49	IPI00062469;IPI00792839	17	57784863	2.66286	2.8686
GGPS1	Geranylgeranyl pyrophosphate synthetase	IPI00032892;IPI00658186	1	235490665	2.65659	0.901652
TPD52	Tumor protein D52	IPI00873344;IPI00896474;IPI00619958;IPI00619951;IPI00941154;IPI00796527	8	80947107	2.63216	1.07781
ZBTB7B	Zinc finger and BTB domain-containing protein 7B	IPI00026277;IPI00937353	1	154975133	2.55443	1.21914
GRB2	Growth factor receptor-bound protein 2	IPI00021327;IPI00792746;IPI00218070;IPI00790124	17	73314157	2.54101	2.19228
ZHX2	Zinc fingers and homeoboxes protein 2	IPI00007256	8	123793901	2.50198	1.05436
BPTF	Nucleosome-remodeling factor subunit BPTF	IPI00785110;IPI00254408;IPI00376404;IPI00024532;IPI00911006	17	65821640	2.46683	1.09731
SCCPDH	Probable saccharopine dehydrogenase	IPI00329600;IPI00641681	1	246887349	2.44011	1.0317
C8orf38	UPF0551 protein C8orf38, mitochondrial	IPI00852983;IPI00847930;IPI00167088;IPI00909221	8	95908041	2.38509	1.18387
MSTO1	Protein misato homolog 1	IPI00306049;IPI00855996;IPI00856007;IPI00642805;IPI00908498;IPI00856061;IPI00910232;IPI00787388	1	155579996	2.36289	0.931767
IMPAD1	Inositol monophosphatase 3	IPI00787853	8	57870491	2.34198	1.03178
GALK1	Galactokinase 1	IPI00019383;IPI00940264;IPI00442827;IPI00747722	17	73754018	2.32915	0.657132
IARS2	Isoleucyl-tRNA synthetase, mitochondrial	IPI00017283	1	220267444	2.31442	1.38218
TFB2M	Dimethyladenosine transferase 2, mitochondrial	IPI00034069	1	246703862	2.26973	0.988613
ATAD2	ATPase family AAA domain-containing protein 2	IPI00170548;IPI00470801;IPI00893906	8	124332093	2.26933	0.900565
TSTA3	GDP-L-fucose synthetase	IPI00014361;IPI00791788;IPI00909958	8	144694788	2.24951	0.833329
ERAL1	GTP-binding protein era homolog	IPI00026512;IPI00216548	17	27182020	2.23612	0.856992
SCAMP3	Secretory carrier-associated membrane protein 3	IPI00306382;IPI00306383	1	155225770	2.22444	1.33157
CNIH4	Protein cornichon homolog 4	IPI00000115;IPI00642014	1	224544552	2.2229	1.32727
GOLPH3	Golgi phosphoprotein 3	IPI00005490	5	32124810	2.2216	0.762004
LASS2	LAG1 longevity assurance homolog 2	IPI00305304;IPI00642378;IPI00642091;IPI00641012;IPI00641435;IPI00472101	1	150933059	2.21077	1.25076
PMVK	Phosphomevalonate kinase	IPI00220648	1	154897210	2.18066	1.33396
GGA3	ADP-ribosylation factor-binding protein GGA3	IPI00021174;IPI00219305;IPI00922831;IPI00922611	17	73232695	2.14876	1.96858
MTERFD1	mTERF domain-containing protein 1, mitochondrial	IPI00101163;IPI00798150	8	97251663	2.13465	0.947382
EPHX1	Epoxide hydrolase 1	IPI00009896;IPI00647694;IPI00640017	1	225997794	2.11924	1.15967
LYPLAL1	Lysophospholipase-like protein 1	IPI00059762;IPI00642838;REV_IPI00464954;REV_IPI00002277;REV_IPI00030829;REV_IPI00791856;REV_IPI00916627	1	219347186	2.11232	1.41807
RBM34	RNA-binding protein 34	IPI00181617;IPI00658072;IPI00930315;IPI00930357;IPI00514231	1	235294498	2.11085	1.01429
HRSP12	Ribonuclease UK114	IPI00005038;IPI00795860;IPI00796361	8	99114567	2.05875	1.03559
JMJD6	Histone arginine demethylase JMJD6	IPI00604598;IPI00550958;IPI00375496;IPI00896458	17	74708914	2.05792	1.06912
CYC1	Cytochrome c1, heme protein, mitochondrial	IPI00029264	8	145149960	2.04165	0.843111
BPNT1	3'(2'),5'-bisphosphate nucleotidase 1	IPI00410214;IPI00910437;IPI00410215	1	220230824	2.03766	1.49135
ANKRD40	Ankyrin repeat domain-containing protein 40	IPI00061168	17	48770551	2.03633	2.25176
WDR26	WD repeat-containing protein 26	IPI00645819	1	224572845	2.03023	1.32596
LIG3	DNA ligase 3	IPI00029081;IPI00000156	17	33307542	2.02339	0.719245
C5orf22	UPF0489 protein C5orf22	IPI00019966;IPI00867737;IPI00910695;IPI00168444	5	31532373	2.02086	0.780235
EPN3	Epsin-3	IPI00300584;IPI00845319;IPI00910899;IPI00386833	17	48610048	2.01465	2.20585
ACBD3	Golgi resident protein GCP60	IPI00009315	1	226332380	1.9964	1.31449
ICT1	Immature colon carcinoma transcript 1 protein	IPI00791262;IPI00029114	17	73008776	1.95351	2.10508
CCDC127	Coiled-coil domain-containing protein 127	IPI00060148	5	204875	1.92744	0.608484
BXDC2	Brix domain-containing protein 2	IPI00181728	5	34915820	1.92449	0.719802
TMEM97	Transmembrane protein 97	IPI00020004;IPI00395967	17	26646161	1.91457	1.10049
HN1	Hematological and neurological expressed 1 protein	IPI00007764;IPI00384857;IPI00447316;IPI00917313;IPI00916337	17	73131343	1.90922	1.86758
SAP30BP	SAP30-binding protein	IPI00549296;IPI00333699;IPI00794827;IPI00792209	17	73663399	1.90454	1.81885
BROX	BRO1 domain-containing protein BROX	IPI00065500;IPI00922787;IPI00644855	1	222885895	1.88877	1.3366
SLC25A32	Mitochondrial folate transporter/carrier	IPI00300886;IPI00793463	8	104410869	1.8802	1.11658
ENAH	Protein enabled homolog	IPI00411623;IPI00646954;IPI00374054;IPI00783772;IPI00749432;IPI00640474;IPI00170979	1	225677502	1.87936	1.311
DECR1	2,4-dienoyl-CoA reductase, mitochondrial	IPI00003482;IPI00789705	8	91013580	1.87886	1.09818
UQCRB	Cytochrome b-c1 complex subunit 7	IPI00220416;IPI00790644;IPI00798386	8	97239310	1.87865	0.92139
PBXIP1	Pre-B-cell leukemia transcription factor-interacting protein 1	IPI00332106;IPI00645060;IPI00220556;IPI00828109	1	154916552	1.8776	1.29331
S100A14	Protein S100-A14	IPI00010214	1	153586731	1.84048	1.2812
TOP1	DNA topoisomerase 1	IPI00413611	20	39657458	1.84033	0.637498
PITPNC1	Cytoplasmic phosphatidylinositol transfer protein 1	IPI00018284;IPI00063187;IPI00942543	17	65373924	1.82722	0.994325
ABCC3	Canalicular multispecific organic anion transporter 2	IPI00006674;IPI00219844;IPI00251066	17	48712218	1.81076	2.26729
RAB4A	Ras-related protein Rab-4A	IPI00480056;IPI00939242	1	229406822	1.80852	1.48508
FTSJ3	Putative rRNA methyltransferase 3	IPI00217686	17	61896795	1.8023	0.905911
NME1-NME2	Nucleoside diphosphate kinase	IPI00604590;IPI00795292;IPI00026260;IPI00790982;IPI00797082;IPI00790856;IPI00794728	17	49230951	1.77533	1.46254
FH	Fumarate hydratase, mitochondrial	IPI00296053;IPI00759715	1	241660903	1.77524	1.10294
ZC3H11A	Zinc finger CCCH domain-containing protein 11A	IPI00328306;IPI00455725	1	203764782	1.76816	1.33648
BRP16	Brain protein 16	IPI00009335;IPI00741734;IPI00937343;IPI00930221;IPI00794094		NaN	1.76704	0.848368
CCDC47	Coiled-coil domain-containing protein 47	IPI00024642;IPI00743775	17	61822611	1.76314	0.893073
GATAD2B	Transcriptional repressor p66-beta	IPI00103554;IPI00556512;IPI00938301	1	153777201	1.75728	1.21051
APPBP2	Amyloid protein-binding protein 2	IPI00007393;IPI00788682	17	58520520	1.7454	2.8379
NCOA5	Nuclear receptor coactivator 5	IPI00288941;IPI00647587	20	44689624	1.73956	0.711786
ANXA9	Annexin A9	IPI00008714	1	150954493	1.72993	1.25608
POGZ	Pogo transposable element with ZNF domain	IPI00410717;IPI00410720;IPI00410719;IPI00514439;IPI00514078	1	151375200	1.72381	1.1492
FAM84B	Protein FAM84B	IPI00064666	8	127564689	1.72327	1.04781
TCEA1	Transcription elongation factor A protein 1	IPI00333215;IPI00943316;IPI00935732;IPI00218106;IPI00922871;IPI00018403;IPI00643225;IPI00646348;IPI00647399	8	54879119	1.71719	1.10334
C10orf58	Uncharacterized protein C10orf58	IPI00296190;IPI00646289;IPI00646889;IPI00939991	10	82167585	1.70439	1.11056
ZNF687	Zinc finger protein 687	IPI00395813;IPI00744026;IPI00916604	1	151254094	1.69094	1.1991
SUPT6H	Transcription elongation factor SPT6	IPI00784161;IPI00456683	17	26989302	1.65847	0.920852
MRPL55	39S ribosomal protein L55, mitochondrial	IPI00419626;IPI00640399;IPI00472663;IPI00644704	1	228294380	1.65111	1.37529
GUK1	Guanylate kinase 1	IPI00514926;IPI00644488;IPI00182293;IPI00515106;IPI00514494;IPI00513820;IPI00514021;IPI00470394	1	228327663	1.64175	1.35185
CDK5	Cell division protein kinase 5	IPI00023530;IPI00827700	7	150750899	1.6284	1.03365
RAB2A	Ras-related protein Rab-2A	IPI00031169;IPI00873632;IPI00794027;IPI00798089;IPI00790570;IPI00794561;IPI00433806;IPI00064352	8	61429559	1.61735	1.13562
CDR2L	Cerebellar degeneration-related protein 2-like	IPI00395950;IPI00935388;IPI00014984	17	72983727	1.61033	2.06179
BUD31	Protein BUD31 homolog	IPI00013180;IPI00922484;IPI00926757;IPI00925240;IPI00925053;IPI00925500	7	99006264	1.58663	0.600898
MRPL27	Putative uncharacterized protein MRPL27	IPI00873328;IPI00009444;IPI00796313;IPI00472168;IPI00790114;IPI00375343	17	48445231	1.57637	2.17199
FAM82B	Regulator of microtubule dynamics protein 1	IPI00329696;IPI00423441;IPI00792962	8	87484578	1.57616	1.0194
ADAR	Double-stranded RNA-specific adenosine deaminase	IPI00394668;IPI00394665;IPI00760588	1	154554537	1.5689	1.23049
MRPS7	28S ribosomal protein S7, mitochondrial	IPI00006440	17	73257749	1.55206	2.0536
RPRD2	Regulation of nuclear pre-mRNA domain-containing protein 2	IPI00384541;IPI00639879;IPI00760919;IPI00647267	1	150335567	1.54717	1.26291
CD46	Membrane cofactor protein	IPI00219852;IPI00332399;IPI00456644;IPI00374177;IPI00332397;IPI00332401;IPI00479283;IPI00012035;IPI00173903;IPI00374175;IPI00398353;IPI00219853;IPI00374176;IPI00398354;IPI00337661;IPI00374178	1	207925402	1.54522	0.657344
MRPL15	39S ribosomal protein L15, mitochondrial	IPI00023086;IPI00477349;IPI00383255;IPI00059796;IPI00414714;IPI00607637;IPI00386276;IPI00914032;IPI00914018;IPI00658021;IPI00914066	8	55047781	1.52608	1.05011
OTUD7B	OTU domain-containing protein 7B	IPI00024658;IPI00647752;IPI00455137;IPI00152625	1	149912231	1.51368	1.20373
ZFAND1	AN1-type zinc finger protein 1	IPI00291064;IPI00642318;IPI00793154	8	82613958	1.50748	1.00782
INTS2	Integrator complex subunit 2	IPI00477759	17	59942728	1.49636	3.2818
TATDN1	Putative deoxyribonuclease TATDN1	IPI00795107;IPI00012463;IPI00792405;IPI00790602;IPI00793548;IPI00792229;IPI00788602	8	125500751	1.4869	1.06421
GOLGA5	Golgin subfamily A member 5	IPI00294065;IPI00333637;IPI00908497	14	93260650	1.48628	0.673115
TBCE	Tubulin-specific chaperone E	IPI00018402;IPI00922443;IPI00922576	1	235530675	1.46771	0.895052
GNA13	Guanine nucleotide-binding protein subunit alpha-13	IPI00290928;IPI00922608	17	63005407	1.46098	0.905982
TARS2	Threonyl-tRNA synthetase, mitochondrial	IPI00604527;IPI00018632;IPI00640970;IPI00514039;IPI00910189	1	150459890	1.45652	1.2093
RCOR1	REST corepressor 1	IPI00008531	14	103059233	1.45143	0.604248
DEGS1	Sphingolipid delta(4)-desaturase DES1	IPI00021147	1	224363458	1.44912	1.25903
GOLPH3L	Golgi phosphoprotein 3-like	IPI00514951;IPI00012313;IPI00922172	1	150618701	1.44166	1.40864
ARFGEF2	Brefeldin A-inhibited guanine nucleotide-exchange protein 2	IPI00002186	20	47538427	1.44163	0.651928
MRPL13	39S ribosomal protein L13, mitochondrial	IPI00022403;IPI00792439;IPI00793491	8	121408083	1.41089	1.04019
NIPBL	Nipped-B-like protein	IPI00436632;IPI00026466;IPI00436634	5	36876861	1.38481	0.867796
RRM2B	Ribonucleoside-diphosphate reductase subunit M2 B	IPI00100213;IPI00741117;IPI00438859;IPI00876866;IPI00735900	8	103216732	1.38466	1.06329
ASPH	Aspartyl/asparaginyl beta-hydroxylase	IPI00294834;IPI00941148;IPI00032449;IPI00032453;IPI00746217;IPI00909538;IPI00921959;IPI00396582;IPI00910043;IPI00024254;IPI00024572;IPI00032450;IPI00433478;IPI00796966	8	62413115	1.37655	1.1399
S100A8	Protein S100-A8	IPI00007047	1	153362508	1.36591	1.26951
SMARCD2	SMARCD2 protein	IPI00848321;IPI00242273;IPI00939917;IPI00177890;IPI00935702;IPI00514042;IPI00853043;IPI00456146;IPI00106988;IPI00903013;IPI00922828;IPI00062599;IPI00221105;IPI00852816;IPI00853408	17	61909441	1.34348	0.897628
STAU2	Double-stranded RNA-binding protein Staufen homolog 2	IPI00300789;IPI00164481;IPI00640881;IPI00644299;IPI00788774;IPI00644696	8	74332608	1.33916	1.07121
VCPIP1	Deubiquitinating protein VCIP135	IPI00064162	8	67540746	1.33761	1.08065
SUB1	Activated RNA polymerase II transcriptional coactivator p15	IPI00221222;IPI00455831;IPI00930562	5	32585605	1.33052	0.796728
CRTC2	CREB-regulated transcription coactivator 2	IPI00783502;IPI00639850	1	153920151	1.32952	1.18121
TAOK1	Serine/threonine-protein kinase TAO1	IPI00002232;IPI00654673;IPI00448764	17	27717943	1.31871	1.46151
OXR1	cDNA FLJ56044, highly similar to Oxidation resistance protein 1	IPI00738813;IPI00908318;IPI00166807;IPI00942506;IPI00902977;IPI00298348;IPI00747160;IPI00924486;IPI00791002;IPI00927650	8	107282473	1.31486	1.09853
URB2	Unhealthy ribosome biogenesis protein 2 homolog	IPI00028980;IPI00647910	1	229761981	1.30784	1.47107
EPRS	cDNA FLJ58269, highly similar to Bifunctional aminoacyl-tRNA synthetase	IPI00923606;IPI00013452;IPI00909383	1	220141943	1.30681	1.54221
INTS3	Integrator complex subunit 3	IPI00792312;IPI00418336;IPI00477093;IPI00645811;IPI00644073	1	153700543	1.26102	1.44461
SLC12A7	Solute carrier family 12 member 7	IPI00008616;IPI00877110;IPI00301180;IPI00921814	5	1050491	1.25204	0.643417
CDC42BPA	Serine/threonine-protein kinase MRCK alpha	IPI00903296;IPI00640957;IPI00640468;IPI00550263;IPI00654830;IPI00642165;IPI00329326;IPI00843961;IPI00872095;IPI00305254;IPI00220440;IPI00220443;IPI00555911;IPI00418464;IPI00644326;IPI00220441;IPI00220439;IPI00790469;IPI00220442;IPI00855901;IPI00215958	1	227177566	1.24531	1.87748
SRP9	Signal recognition particle 9 kDa protein	IPI00642816;IPI00216125;IPI00419797	1	225965531	1.23653	1.18984
RRP15	RRP15-like protein	IPI00007004	1	218458629	1.22931	1.43953
TRAPPC9	Putative uncharacterized protein TRAPPC9	IPI00181881;IPI00783996;IPI00940268;IPI00790904	8	140742588	1.22773	0.935672
RRS1	Ribosome biogenesis regulatory protein homolog	IPI00014253	8	67341263	1.21671	1.02157
YY1	Transcriptional repressor protein YY1	IPI00878557;IPI00014513;IPI00419912;IPI00292080	14	100705322	1.21212	0.661464
PYCRL	Pyrroline-5-carboxylate reductase 3	IPI00939144;IPI00926996	8	144686083	1.21035	0.8064
TK1	Thymidine kinase, cytosolic	IPI00299214;IPI00791117;IPI00794651;IPI00795236	17	76170160	1.20939	0.892792
TPD52L2	Tumor protein D54	IPI00399266;IPI00399268;IPI00221178	20	62489087	1.19019	0.618684
SPAG1	Sperm-associated antigen 1	IPI00292326;IPI00903172	8	101170263	1.18466	1.10853
BOP1	Ribosome biogenesis protein BOP1	IPI00028955;IPI00741996	8	145486056	1.1823	0.771911
TBX2	T-box transcription factor TBX2	IPI00297902;IPI00940256;IPI00925935;IPI00555938	17	59477257	1.17944	2.94927
ATP5H	ATP synthase subunit d, mitochondrial	IPI00220487;IPI00456049;IPI00792135;IPI00888359;IPI00887091;IPI00879809	17	73034955	1.17553	2.11709
FAM164A	UPF0418 protein FAM164A	IPI00329753;IPI00941479	8	79578330	1.16648	1.0735
MRPL9	39S ribosomal protein L9, mitochondrial	IPI00307409;IPI00514545;IPI00909587;IPI00909111	1	151732119	1.16374	1.19242
BOLA1	BolA-like protein 1	IPI00032900	1	149858486	1.16279	1.20364
MTX1	Metaxin-1	IPI00013678;IPI00914855;IPI00760637;IPI00394889	1	155178490	1.13796	1.31365
PI4KB	Phosphatidylinositol 4-kinase beta	IPI00641770;IPI00939510;IPI00002591;IPI00165547;IPI00852910;IPI00917885;IPI00852779	1	151264413	1.12266	1.19049
VPS45	Vacuolar protein sorting-associated protein 45	IPI00090327;IPI00514681	1	150039342	1.11576	1.26755
MRPL41	39S ribosomal protein L41, mitochondrial	IPI00217553	9	140445651	1.11077	2.17199
WIPI1	WD repeat domain phosphoinositide-interacting protein 1	IPI00217556;IPI00658123;IPI00792340	17	66417423	1.08916	0.981222
ARFGAP1	ADP-ribosylation factor GTPase-activating protein 1	IPI00217354;IPI00175169;IPI00449160;IPI00922590	20	61904156	1.07566	0.603682
NDUFS2	NADH dehydrogenase [ubiquinone] iron-sulfur protein 2, mitochondrial	IPI00025239	1	161166894	1.06116	0.611875
DDX27	Probable ATP-dependent RNA helicase DDX27	IPI00293078	20	47835884	1.05841	0.60948
EIF4A3	Eukaryotic initiation factor 4A-III	IPI00009328	17	78109019	1.04552	0.843292
SEC22B	Vesicle-trafficking protein SEC22b	IPI00006865		NaN	1.03227	0.977831
MRPS30	28S ribosomal protein S30, mitochondrial	IPI00010278	5	44809027	1.03002	0.808104
HIST2H3A	Histone H3.2	IPI00171611;IPI00216402;IPI00909530;IPI00419884;IPI00477080;IPI00793280;IPI00942498;IPI00792719	1;12;17	149784826	1.01652	0.731921
CYHR1	Cysteine and histidine-rich protein 1	IPI00889783;IPI00889572	8	145675762	1.01319	0.824144
PRKAR1A	cAMP-dependent protein kinase type I-alpha regulatory subunit	IPI00021831;IPI00789368	17	66508110	1.01166	1.02851
YWHAB	14-3-3 protein beta/alpha	IPI00759832	20	43514317	1.01001	0.664633
EXOSC4	Exosome complex exonuclease RRP41	IPI00745613	8	145133522	-1.00544	0.870938
STK24	Serine/threonine-protein kinase 24	IPI00335281;IPI00909904;IPI00002212;IPI00640104;IPI00552426;IPI00641189;IPI00386250	13	99102455	-1.08934	0.982025
S100A2	Putative uncharacterized protein S100A2	IPI00873099;IPI00514806	1	153533584	-1.14068	1.18668
NUP133	Nuclear pore complex protein Nup133	IPI00291200;IPI00514905;IPI00641510	1	229577044	-1.16904	1.51774
TANC2	Protein TANC2	IPI00894531;IPI00868787;IPI00892805;IPI00893434	17	61086898	-1.20714	1.0315
NNT	NAD(P) transhydrogenase, mitochondrial	IPI00337541	5	43602825	-1.3605	0.880106
TTPAL	Alpha-tocopherol transfer protein-like	IPI00013624;IPI00513894;IPI00853416	20	43104526	-1.47708	0.617683
CAPN2	Calpain-2 catalytic subunit	IPI00289758;IPI00910745;IPI00902887;IPI00446140;IPI00376289;IPI00874238;IPI00888895	1	223889347	-1.48054	1.36277
MSN	Moesin	IPI00219365;IPI00872814;REV_IPI00160552;REV_IPI00554760;REV_IPI00909641;REV_IPI00514663	X	64887537	-1.60584	0.74358
GALNT2	Polypeptide N-acetylgalactosaminyltransferase 2	IPI00004669;IPI00922793;IPI00921824	1	230193737	-1.60692	1.4944
TRIO	Triple functional domain protein	IPI00657953;IPI00479523;IPI00384882;IPI00028382;IPI00794432;IPI00921549;IPI00442035	5	14143811	-1.76936	0.726071
SCPEP1	Retinoid-inducible serine carboxypeptidase	IPI00012426;IPI00477895;IPI00789511	17	55055468	-1.78394	0.65967
BASP1	Brain acid soluble protein 1	IPI00299024;IPI00908521	5	17217669	-1.82704	0.708464
IMPA1	cDNA FLJ54837, highly similar to Inositol monophosphatase (EC 3.1.3.25)	IPI00921428;IPI00020906;IPI00791997;IPI00790217	8	82569151	-1.95044	0.950517
ITGA3	Integrin alpha-3	IPI00290043;IPI00215995	17	48133340	-2.03339	2.05035
PPM2C	cDNA FLJ56179, highly similar to Pyruvate dehydrogenase (lipoamide)-phosphatase 1 (EC 3.1.3.43)	IPI00794806;IPI00935529;IPI00218971	8	94929162	-2.07755	1.07081
CHD7	Chromodomain-helicase-DNA-binding protein 7	IPI00794880	8	61591339	-2.10307	1.12187
PLXNA1	Plexin-A1	IPI00552671;IPI00871326;IPI00924497;IPI00925647;IPI00759587	3	126707437	-2.78392	1.07601
GINS2	DNA replication complex GINS protein PSF2	IPI00007146	16	85709804	-2.85906	0.61286
PLEC1	Plectin-1	IPI00014898;IPI00186711;IPI00398778;IPI00398775;IPI00398776;REV_IPI00025442;REV_IPI00646992;REV_IPI00180781;REV_IPI00011276;REV_IPI00182167;REV_IPI00642832	8	144989321	-3.0242	1.02277
S100A4	Protein S100-A4	IPI00032313	1	153516089	-3.192	1.1881
S100A9	Protein S100-A9	IPI00027462;IPI00939362	1	153330330	-3.41328	1.32308
S100A10	Protein S100-A10	IPI00183695	1	151955391	-3.6905	1.45186
CA2	Carbonic anhydrase 2	IPI00218414;IPI00790885	8	86376131	-3.8695	1.00697
ITGB4	Integrin beta-4	IPI00220845;IPI00027422;IPI00220847;IPI00220846;IPI00909605	17	73717516	-4.94985	1.49786
S100A6	Protein S100-A6	IPI00027463	1	153507075	-6.31726	1.20446

## Sheet: amp1143
Table S3B: Amplified genes in HCC1143 cells of which the protein levels are either two-fold up or down-regulated.
Gene Names	Protein Names	Protein IDs	Chromosome	Position	Log2 Ratio HCC1143/HMEC protein	Log2 Ratio HCC1143/HMEC Copy number
UBE2T	Ubiquitin-conjugating enzyme E2 T	IPI00023087	1	202300785	5.78797	0.719626
MB	Myoglobin	IPI00217493;IPI00878623;IPI00879081;IPI00879413;IPI00879863;IPI00878918	22	36002811	5.43371	0.727593
TYMS	Thymidylate synthase	IPI00221108;IPI00103732;IPI00642342;IPI00103733	18	657604	4.87663	0.927516
COL6A1	Collagen alpha-1(VI) chain	IPI00291136;IPI00942349	21	47401651	4.76302	0.939511
SELENBP1	Selenium-binding protein 1	IPI00943000;IPI00012303;IPI00942368;IPI00852838;IPI00852768;IPI00030385;IPI00853528;IPI00892906;IPI00852953;IPI00893579	1	151336778	3.95077	0.820718
CYB5A	Cytochrome b5	IPI00397860;IPI00871858;IPI00182933;IPI00645474;IPI00646039	18	71920528	3.7428	0.798241
PRR11	Proline-rich protein 11	IPI00305822	17	57233101	3.73466	0.644436
NOTCH3	Neurogenic locus notch homolog protein 3	IPI00029819	19	15270445	3.69956	2.40298
FANCD2	Fanconi anemia group D2 protein	IPI00075081;IPI00604399;IPI00604576;IPI00926908;IPI00604753;IPI00925767;IPI00792112;IPI00925969	3	10068098	3.50685	0.788466
WIZ	Protein Wiz	IPI00295502;IPI00741630;IPI00922835	19	15532319	3.44718	2.57924
S100A4	Protein S100-A4	IPI00032313	1	153516089	3.35557	0.769792
NF2	Merlin	IPI00220308;IPI00922689;IPI00414431;IPI00304755;IPI00220314;IPI00220311;IPI00220312;IPI00220310;IPI00414202;IPI00216128;IPI00220315	22	29999545	3.31204	0.599391
AKAP8	A-kinase anchor protein 8	IPI00014474	19	15464341	3.22353	2.56888
PLSCR1	Phospholipid scramblase 1	IPI00005181;IPI00797396;IPI00789500;IPI00790091	3	146232967	3.17614	0.71956
PATZ1	POZ-, AT hook-, and zinc finger-containing protein 1	IPI00003801;IPI00217078;IPI00395545;IPI00942248;IPI00034248	22	31721790	3.0676	0.736516
KIAA0802	Uncharacterized protein KIAA0802	IPI00792611;IPI00794856;IPI00411635;IPI00477620;IPI00829780;IPI00375286	18	8705659	2.9514	1.47695
ATAD2	ATPase family AAA domain-containing protein 2	IPI00170548;IPI00470801;IPI00893906	8	124332093	2.78553	1.00927
TSPYL5	Testis-specific Y-encoded-like protein 5	IPI00028279	8	98285717	2.75627	0.824467
AKAP8L	A-kinase anchor protein 8-like	IPI00297455;IPI00939756;IPI00641614;IPI00644440;IPI00645037;IPI00646239	19	15490859	2.71098	2.55615
CAMK1D	Calcium/calmodulin-dependent protein kinase type 1D	IPI00170508;IPI00170675;IPI00555769	10	12391481	2.68302	0.76848
CGGBP1	CGG triplet repeat-binding protein 1	IPI00295585;IPI00795467	3	88101094	2.67478	0.611691
CCDC88C	Protein Daple	IPI00740019;IPI00029170;IPI00217770;IPI00384031	14	91737669	2.65853	0.644535
TCF20	Transcription factor 20	IPI00159322;IPI00220381;IPI00871677;IPI00879664;IPI00647831;IPI00607699	22	42556019	2.5616	0.709951
ZNF24	Zinc finger protein 24	IPI00306446	18	32912176	2.5111	0.877266
SKT	Sickle tail protein homolog	IPI00645403;IPI00909942;IPI00845521;IPI00103018;IPI00643898;IPI00187002;IPI00878042;IPI00855886;IPI00853173;IPI00644401;IPI00908793	10	23983675	2.47268	0.844605
TPD52	Tumor protein D52	IPI00873344;IPI00896474;IPI00619958;IPI00619951;IPI00941154;IPI00796527	8	80947107	2.47065	1.12353
CBX1	Putative uncharacterized protein CBX1	IPI00878669;IPI00010320;IPI00001830;IPI00879132	17	46147414	2.46667	0.765328
LLPH	Protein LLP homolog	IPI00031615;IPI00887445	12	66516842	2.40508	2.09807
LNEBL	cDNA, FLJ79420, highly similar to Homo sapiens nebulette (NEBL), transcript variant 2, mRNA	IPI00418240;IPI00910364;IPI00872370;IPI00943314;IPI00844035	10	21068902	2.39167	0.8961
CGN	Cingulin	IPI00844508;IPI00929635;IPI00852984;IPI00797763;IPI00915752;IPI00744509	1	151483863	2.37176	0.893201
PBXIP1	Pre-B-cell leukemia transcription factor-interacting protein 1	IPI00332106;IPI00645060;IPI00220556;IPI00828109	1	154916552	2.3684	0.692222
TRPS1	Zinc finger transcription factor Trps1	IPI00853099;IPI00937887;IPI00296078	8	116420724	2.36131	1.14832
TDRKH	Tudor and KH domain-containing protein	IPI00009982;IPI00410251;IPI00642210;IPI00922525	1	151744050	2.35758	0.788503
RAB12	Putative Ras-related protein Rab-12	IPI00419932	18	8609443	2.35488	1.45701
MORC2	MORC family CW-type zinc finger protein 2	IPI00455518;IPI00873776;IPI00892877;IPI00894300	22	31322596	2.30232	0.701456
CHAF1B	Chromatin assembly factor 1 subunit B	IPI00011857	21	37757676	2.29838	0.926212
ZFAND1	AN1-type zinc finger protein 1	IPI00291064;IPI00642318;IPI00793154	8	82613958	2.29481	1.13301
TLN2	Talin-2	IPI00219299	15	62939477	2.28686	0.631298
KIN	DNA/RNA-binding protein KIN17	IPI00017580;IPI00921892	10	7795188	2.27484	0.781235
ILVBL	Acetolactate synthase-like protein	IPI00554541;IPI00556135;IPI00556506	19	15225789	2.27272	2.71304
C20orf117	Uncharacterized protein C20orf117	IPI00797771;IPI00915294;IPI00942898;IPI00022274	20	35405845	2.26693	0.862584
H1F0	Histone H1.0	IPI00550239	22	38201114	2.23905	0.680663
RAB6B	Ras-related protein Rab-6B	IPI00016891	3	133543083	2.22599	0.644759
CCND1	G1/S-specific cyclin-D1	IPI00028098;IPI00815934	11	69455873	2.19858	2.37609
NDRG2	Protein NDRG2	IPI00008994;IPI00218109;IPI00218108;IPI00759789;IPI00382995;IPI00384121;IPI00791522	14	21484922	2.16899	0.66203
FAM83D	Protein FAM83D	IPI00480103;IPI00939116;IPI00922140	20	37554955	2.11911	0.78722
ZNF295	Zinc finger protein 295	IPI00008137;IPI00797660	21	43406940	2.10496	0.944776
SAMHD1	SAM domain and HD domain-containing protein 1	IPI00294739;IPI00553034	20	35518632	2.09279	0.808004
CAND1	Cullin-associated NEDD8-dissociated protein 1	IPI00100160;IPI00604431;IPI00915424;IPI00791537;IPI00374208;IPI00926727;IPI00925352;IPI00792154	12	67663061	2.09192	2.24226
BRD4	Bromodomain-containing protein 4	IPI00440727;IPI00477699;IPI00440728;IPI00940018;IPI00892847;IPI00894118	19	15348301	2.08872	2.45454
NSL1	Kinetochore-associated protein NSL1 homolog	IPI00306330;IPI00909118	1	212899495	2.0788	0.79448
SUPT5H	Transcription elongation factor SPT5	IPI00298058;IPI00655641;IPI00903259	19	39936186	2.07063	0.709731
SLC12A7	Solute carrier family 12 member 7	IPI00008616;IPI00877110;IPI00301180;IPI00921814	5	1050491	2.06509	0.604965
HCA90	Hepatocellular carcinoma-associated antigen 90	IPI00102661;IPI00008477	20	30327074	2.06385	1.40185
MCM5	DNA replication licensing factor MCM5	IPI00018350;IPI00878310;IPI00877948;IPI00555581;IPI00942307;IPI00878128;IPI00878272;IPI00878442	22	35796056	2.05944	0.688702
CD2AP	CD2-associated protein	IPI00412771	6	47445525	2.05779	0.929385
MCM3	cDNA, FLJ93378, highly similar to Homo sapiens MCM3 minichromosome maintenance deficient 3 (S. cerevisiae) (MCM3), mRNA	IPI00013214;IPI00940786;IPI00385434	6	52128807	2.03273	0.934325
APIP	cDNA FLJ58961, highly similar to APAF1-interacting protein	IPI00911064;IPI00549730;IPI00449162	11	34903845	2.02932	0.995002
DHTKD1	Probable 2-oxoglutarate dehydrogenase E1 component DHKTD1, mitochondrial	IPI00063408;IPI00640506;IPI00640072;IPI00644967	10	12110971	2.02122	0.775598
PNPO	Pyridoxine-5'-phosphate oxidase	IPI00018272;IPI00793232;IPI00792667;IPI00940387	17	46018889	2.01259	1.61832
GATAD2B	Transcriptional repressor p66-beta	IPI00103554;IPI00556512;IPI00938301	1	153777201	1.99831	0.892521
CDC2	Cell division control protein 2 homolog	IPI00026689;IPI00908424;IPI00165249;IPI00742856;IPI00877696;IPI00925315;IPI00044678;IPI00917390;IPI00829793;IPI00442058	10	62538101	1.99214	0.638129
C5orf22	UPF0489 protein C5orf22	IPI00019966;IPI00867737;IPI00910695;IPI00168444	5	31532373	1.97645	0.815919
CALML5	Calmodulin-like protein 5	IPI00021536	10	5540660	1.96411	0.987721
CYHR1	Cysteine and histidine-rich protein 1	IPI00889783;IPI00889572	8	145675762	1.95392	0.978997
MED29	Mediator of RNA polymerase II transcription subunit 29	IPI00032780	19	39881963	1.94248	0.636927
DHX35	Probable ATP-dependent RNA helicase DHX35	IPI00030288;IPI00642913;IPI00513682;IPI00514896;IPI00909339	20	37590942	1.93593	0.802204
PPFIA1	Liprin-alpha-1	IPI00163496;IPI00219754;IPI00289271;IPI00942213;IPI00941375;IPI00795341;IPI00922534;IPI00642161;IPI00916144;IPI00397579;IPI00797801	11	70116823	1.92482	1.47227
SUMF1	Sulfatase-modifying factor 1	IPI00432718;IPI00301144;IPI00785161;IPI00332413;IPI00909612	3	3742498	1.91325	1.16398
STAU2	Double-stranded RNA-binding protein Staufen homolog 2	IPI00300789;IPI00164481;IPI00640881;IPI00644299;IPI00788774;IPI00644696	8	74332608	1.90535	0.896728
BROX	BRO1 domain-containing protein BROX	IPI00065500;IPI00922787;IPI00644855	1	222885895	1.90235	1.21058
CYTSA	Cytospin-A	IPI00178072;IPI00744837;IPI00879449;IPI00879862	22	24666786	1.88899	0.711574
C8orf55	UPF0670 protein C8orf55	IPI00171421;IPI00791754	8	143808621	1.88212	1.0317
TNS3	Tensin-3	IPI00658152;IPI00854869;IPI00924727;IPI00854760;IPI00854817;IPI00926989;IPI00926634	7	47314752	1.8737	0.636444
FBL	rRNA 2'-O-methyltransferase fibrillarin	IPI00025039;IPI00235647	19	40325094	1.87121	0.624021
SNTB1	Beta-1-syntrophin	IPI00026059;IPI00216858	8	121547985	1.85573	0.939194
ANP32E	Acidic leucine-rich nuclear phosphoprotein 32 family member E	IPI00165393;IPI00910423;IPI00514333;IPI00910661;IPI00514758	1	150190717	1.83047	0.815561
GRP	Galectin-related protein	IPI00023549	2	64681103	1.81908	0.595302
TSFM	Elongation factor Ts, mitochondrial	IPI00216260;IPI00021016;IPI00910455;IPI00916152;IPI00917718	12	58166811	1.8173	0.694287
HNRNPA3	Heterogeneous nuclear ribonucleoprotein A3	IPI00419373;IPI00939124;IPI00927677;IPI00940369;IPI00470658;IPI00927189;IPI00926389;IPI00927894	2	178077291	1.80539	0.803078
SMCHD1	Structural maintenance of chromosomes flexible hinge domain-containing protein 1	IPI00890837;IPI00465022;IPI00645162	18	2655886	1.78445	0.939953
SLC25A32	Mitochondrial folate transporter/carrier	IPI00300886;IPI00793463	8	104410869	1.76351	1.41324
RAB21	Ras-related protein Rab-21	IPI00007755;IPI00790578	12	72148658	1.74145	1.36518
CDC45L	cDNA FLJ60098, highly similar to CDC45-related protein	IPI00909930;IPI00025695;IPI00878645;IPI00879106	22	19466982	1.74098	0.735419
MTA1	Full-length cDNA 5-PRIME end of clone CS0DK005YC03 of HeLa cells of Homo sapiens (human)	IPI00879374;IPI00879166;IPI00012773;IPI00215764;IPI00879971;IPI00879781;IPI00879521	14	105886157	1.73182	1.00621
MAL2	Protein MAL2	IPI00056414;IPI00941173	8	120220610	1.72206	1.10296
RAD21	Double-strand-break repair protein rad21 homolog	IPI00006715;IPI00903016;IPI00916789	8	117858174	1.69171	1.14531
CARKD	Carbohydrate kinase domain-containing protein	IPI00645172;IPI00873027;IPI00908636;IPI00909495;IPI00910136;IPI00867692;IPI00922893		NaN	1.67018	0.816111
TRNT1	tRNA-nucleotidyltransferase 1, mitochondrial	IPI00289807;IPI00301719;IPI00927685;IPI00925330;IPI00921077;IPI00305221	3	3168600	1.6699	1.06889
IRS2	Insulin receptor substrate 2	IPI00464978	13	110406184	1.66795	0.890858
NAPG	Gamma-soluble NSF attachment protein	IPI00293817;IPI00643239	18	10525873	1.65545	1.30664
RSU1	Ras suppressor protein 1	IPI00017256;IPI00847168;IPI00478433;IPI00377066;IPI00457006	10	16632610	1.6546	0.912356
ZHX2	Zinc fingers and homeoboxes protein 2	IPI00007256	8	123793901	1.64474	0.976013
BPTF	Nucleosome-remodeling factor subunit BPTF	IPI00785110;IPI00254408;IPI00376404;IPI00024532;IPI00911006	17	65821640	1.59165	0.851014
MCAT	Malonyl CoA-acyl carrier protein transacylase, mitochondrial	IPI00023359;IPI00163960	22	43528886	1.58137	0.635654
POLDIP3	cDNA FLJ54030, highly similar to Polymerase delta-interacting protein 3	IPI00440688;IPI00940039;IPI00440689;IPI00878135;IPI00877685;IPI00429180;IPI00908753	22	42979727	1.57825	0.61468
HNRNPAB	Heterogeneous nuclear ribonucleoprotein A/B	IPI00334587;IPI00742926;IPI00334713;IPI00329355;IPI00106509	5	177631508	1.57758	0.689991
UNC84B	cDNA FLJ55508, highly similar to Sad1/unc-84-like protein 2	IPI00295940;IPI00878697;IPI00941110;IPI00877626	22	39130730	1.54448	0.691897
CDK5	Cell division protein kinase 5	IPI00023530;IPI00827700	7	150750899	1.54404	1.02391
PRIM1	DNA primase small subunit	IPI00027704;IPI00793754;IPI00792711;IPI00795023	12	57125372	1.54163	0.715941
CANX	cDNA FLJ55574, highly similar to Calnexin	IPI00020984;IPI00941747;IPI00477719;IPI00442866;IPI00383227;IPI00024776	5	179125503	1.53899	0.636397
PITRM1	Presequence protease, mitochondrial	IPI00787827;IPI00219613;IPI00552829;IPI00553109;IPI00552238;IPI00470936;IPI00641550	10	3179920	1.53178	0.938008
GOLPH3	Golgi phosphoprotein 3	IPI00005490	5	32124810	1.52995	0.900878
S100A2	Putative uncharacterized protein S100A2	IPI00873099;IPI00514806	1	153533584	1.52905	0.763584
DNAJC10	DnaJ homolog subfamily C member 10	IPI00293260;IPI00844115;IPI00873764	2	183580999	1.50474	0.885859
MYST2	Histone acetyltransferase MYST2	IPI00180764;IPI00792061;IPI00909397;IPI00909215;IPI00607795;IPI00103685	17	47866058	1.50258	0.731658
PIGN	GPI ethanolamine phosphate transferase 1	IPI00017598	18	59711460	1.48902	0.652668
TRIP13	Thyroid receptor-interacting protein 13	IPI00003505;IPI00847729	5	892758	1.48057	0.621925
TARS2	Threonyl-tRNA synthetase, mitochondrial	IPI00604527;IPI00018632;IPI00640970;IPI00514039;IPI00910189	1	150459890	1.47386	0.978427
PURB	Transcriptional activator protein Pur-beta	IPI00045051;IPI00002534;IPI00383017	7	44915896	1.47312	0.755772
XPO5	Exportin-5	IPI00640703;IPI00747670;IPI00549861;IPI00872800	6	43490069	1.4723	0.842438
FIP1L1	Pre-mRNA 3'-end-processing factor FIP1	IPI00395337;IPI00658114;IPI00657863;IPI00008449;IPI00910500	4	54243820	1.47219	0.873087
NENF	Neudesin	IPI00002525	1	212606229	1.44092	1.06704
NAGA	Alpha-N-acetylgalactosaminidase	IPI00414909;IPI00917374;IPI00917198	22	42428724	1.43354	0.81748
CCDC134	Coiled-coil domain-containing protein 134	IPI00302674;IPI00893350	22	42196683	1.42587	0.728649
EP300	Histone acetyltransferase p300	IPI00020985	22	41487790	1.41977	0.676401
FBXO3	F-box only protein 3	IPI00296789;IPI00472624;IPI00746271;IPI00478103;IPI00910578	11	33762490	1.41284	0.812346
RALY	RNA-binding protein Raly	IPI00216044;IPI00011268;IPI00642213;IPI00514496;IPI00641351;IPI00640938	20	32581452	1.40946	1.07608
GNB1L	Guanine nucleotide-binding protein subunit beta-like protein 1	IPI00107339;IPI00218734;IPI00879333	22	19770747	1.40356	0.60299
ZC3H15	Zinc finger CCCH domain-containing protein 15	IPI00000279;IPI00909823;IPI00927837	2	187350883	1.39306	0.958491
MBP	Myelin basic protein	IPI00021907;IPI00943158;IPI00922124;IPI00792445;IPI00216474;IPI00216475;IPI00871491;IPI00607642;IPI00789377;IPI00793055;IPI00216477;IPI00216478;IPI00607691;IPI00718832	18	74690783	1.38902	0.69334
CHD1L	Chromodomain-helicase-DNA-binding protein 1-like	IPI00329088;IPI00890729;IPI00890749;IPI00854584;IPI00400835;IPI00909123	1	146714291	1.38009	0.975978
ATP6V1C1	V-type proton ATPase subunit C 1	IPI00007814;IPI00873237;IPI00789054	8	104033248	1.37672	1.52366
VAPA	Vesicle-associated membrane protein-associated protein A	IPI00170692;IPI00640416;IPI00929577;IPI00642826	18	9913999	1.37081	1.50665
ABCB7	ATP-binding cassette sub-family B member 7, mitochondrial	IPI00556553;IPI00306748	X	74273109	1.35824	0.783567
YME1L1	ATP-dependent metalloprotease YME1L1	IPI00045946;IPI00099529;IPI00513860;IPI00645379;IPI00844240	10	27399383	1.35773	0.896178
TPRKB	TP53RK-binding protein	IPI00217362;IPI00301432;IPI00883884;IPI00829935;IPI00910103	2	73955818	1.35261	0.603306
CTDP1	RNA polymerase II subunit A C-terminal domain phosphatase	IPI00410256;IPI00873195;IPI00410257;IPI00410258;IPI00640254	18	77439801	1.35257	0.742156
PRKRA	Interferon-inducible double stranded RNA-dependent protein kinase activator A	IPI00021167;IPI00718940;IPI00719567;IPI00916597;IPI00915919;IPI00917410	2	179296141	1.35238	0.84508
NSF	Vesicle-fusing ATPase	IPI00006451;IPI00936987;IPI00787942;IPI00938290;IPI00794412;IPI00748065	17	44668075	1.34242	0.645962
TXNL4A	Thioredoxin-like protein 4A	IPI00216338;IPI00646071;IPI00384845;IPI00642194;IPI00645552;IPI00646413;IPI00647954	18	77732869	1.32769	0.797116
AIDA	Axin interactor, dorsalization-associated protein	IPI00303602;IPI00480020;IPI00867514;IPI00783517	1	222841355	1.32478	1.23674
BOP1	Ribosome biogenesis protein BOP1	IPI00028955;IPI00741996	8	145486056	1.32159	0.870079
PICK1	PRKCA-binding protein	IPI00160369;IPI00893491	22	38452318	1.2892	0.617931
DGKE	Diacylglycerol kinase epsilon	IPI00003293;IPI00382834	17	54911460	1.28258	0.606429
URG4	Protein URG4	IPI00845273;IPI00816121;IPI00942969;IPI00743955;IPI00903029	7	43915493	1.25733	0.656862
MTPAP	Poly(A) RNA polymerase, mitochondrial	IPI00470416;IPI00153051;IPI00641482;IPI00884218	10	30598730	1.25639	0.803607
PRPF3	U4/U6 small nuclear ribonucleoprotein Prp3	IPI00005861;IPI00377152;IPI00909797	1	150293925	1.25614	0.699824
ACP6	Lysophosphatidic acid phosphatase type 6	IPI00099838;IPI00556344	1	147119170	1.25339	0.923035
KIAA1468	LisH domain and HEAT repeat-containing protein KIAA1468	IPI00023330;IPI00797368;IPI00101291;IPI00647343;IPI00647895;IPI00939277	18	59854507	1.24623	0.631062
HSF1	Heat shock factor protein 1	IPI00024071;IPI00218507;IPI00871163;IPI00012878;IPI00913872;IPI00008456;IPI00220197;IPI00909210;IPI00902551	8	145515270	1.24012	0.861656
XPNPEP3	Probable Xaa-Pro aminopeptidase 3	IPI00550192;IPI00795212;IPI00922407;IPI00794503	22	41253081	1.23659	0.845223
TSTA3	GDP-L-fucose synthetase	IPI00014361;IPI00791788;IPI00909958	8	144694788	1.23563	1.00267
POFUT1	GDP-fucose protein O-fucosyltransferase 1	IPI00058192;IPI00218176	20	30795683	1.22632	1.21289
SLC25A17	Peroxisomal membrane protein PMP34	IPI00014440;IPI00877594;IPI00908507;IPI00878347;IPI00877904;IPI00878748;IPI00879785	22	41165634	1.22407	0.759954
TATDN1	Putative deoxyribonuclease TATDN1	IPI00795107;IPI00012463;IPI00792405;IPI00790602;IPI00793548;IPI00792229;IPI00788602	8	125500751	1.2236	1.01844
ZNF687	Zinc finger protein 687	IPI00395813;IPI00744026;IPI00916604	1	151254094	1.22348	0.804366
RPRD2	Regulation of nuclear pre-mRNA domain-containing protein 2	IPI00384541;IPI00639879;IPI00760919;IPI00647267	1	150335567	1.21993	0.78586
LIG3	DNA ligase 3	IPI00029081;IPI00000156	17	33307542	1.21699	0.600262
CHM	Rab proteins geranylgeranyltransferase component A 1	IPI00028099	X	85116185	1.21352	0.758164
ADAM10	Disintegrin and metalloproteinase domain-containing protein 10	IPI00013897;IPI00794448;IPI00792351;IPI00878134	15	58887403	1.20335	0.692464
TIMELESS	Protein timeless homolog	IPI00335541;IPI00554678;IPI00909597	12	56810158	1.1985	0.707394
CTTN	Src substrate cortactin	IPI00029601;IPI00791680;IPI00792087	11	70244510	1.1919	1.53604
RPRD1B	Regulation of nuclear pre-mRNA domain-containing protein 1B	IPI00009659;IPI00797536	20	36661948	1.18911	0.855071
DDX41	Probable ATP-dependent RNA helicase DDX41	IPI00007208	5	176938578	1.18656	0.725433
DLGAP4	Disks large-associated protein 4	IPI00220581;IPI00007138;IPI00411461;IPI00942560;IPI00654770	20	34894258	1.18083	0.763681
TTLL12	Tubulin--tyrosine ligase-like protein 12	IPI00029048;IPI00879002;IPI00386569	22	43562628	1.17924	0.61612
ZNF318	Zinc finger protein 318	IPI00413365;IPI00168692	6	43299513	1.17471	0.902211
GTPBP4	Nucleolar GTP-binding protein 1	IPI00385042;IPI00645138	10	1034338	1.16858	1.00042
DRG1	Developmentally-regulated GTP-binding protein 1	IPI00031836;IPI00877819;IPI00877958;IPI00878191;IPI00878823	22	31795509	1.16757	0.678609
WDR44	WD repeat-containing protein 44	IPI00444371;IPI00872729;IPI00639995;IPI00909478;IPI00807730;IPI00747740	X	117480042	1.15962	0.975011
ZNF451	Zinc finger protein 451	IPI00000725;IPI00375612;IPI00375614	6	56954828	1.14564	0.922153
CDC5L	Cell division cycle 5-like protein	IPI00465294;IPI00909093	6	44355262	1.14434	0.916949
HNRNPA3	Heterogeneous nuclear ribonucleoprotein A3	IPI00455134;IPI00927407;IPI00909208	2	178077291	1.14431	0.803078
EEF1D	cDNA, FLJ95068, highly similar to Homo sapiens eukaryotic translation elongation factor 1 delta (guanine nucleotide exchange protein) (EEF1D), transcript variant 1, mRNA	IPI00642971;IPI00789435;IPI00023048;IPI00796284;IPI00795920;IPI00793083;IPI00792430	8	144661898	1.1388	0.982582
POGZ	Pogo transposable element with ZNF domain	IPI00410717;IPI00410720;IPI00410719;IPI00514439;IPI00514078	1	151375200	1.13326	0.852009
PDCD2L	Programmed cell death protein 2-like	IPI00031647	19	34895303	1.13155	0.600974
PTGES3	cDNA FLJ40895 fis, clone UTERU2002294, highly similar to Prostaglandin E synthase 3 (EC 5.3.99.3)	IPI00789101;IPI00789698;IPI00015029;IPI00908647;IPI00790462;IPI00910575;IPI00910005	12	57057127	1.12752	0.79527
NSUN2	tRNA (cytosine-5-)-methyltransferase NSUN2	IPI00306369	5	6599352	1.11411	0.665275
EPB41L1	Band 4.1-like protein 1	IPI00024062;IPI00644651;IPI00645410;IPI00256095;IPI00646098;IPI00642786;IPI00641968;IPI00642915;IPI00646198;IPI00646661;IPI00647052;IPI00607638;IPI00641271	20	34679426	1.10882	0.940828
SPAG9	C-jun-amino-terminal kinase-interacting protein 4	IPI00479676;IPI00745406;IPI00744648;IPI00218097;IPI00384432;IPI00744288;IPI00879552;IPI00385301;IPI00303397;IPI00748833	17	49039535	1.09973	0.703444
FAM84B	Protein FAM84B	IPI00064666	8	127564689	1.09701	1.06616
RBM17	Splicing factor 45	IPI00176706;IPI00479589;IPI00646846;IPI00647772;IPI00647326	10	6130949	1.08687	0.790152
MPP7	MAGUK p55 subfamily member 7	IPI00217617;IPI00513759;IPI00908837	10	28339922	1.08372	0.929662
TBC1D15	TBC1 domain family member 15	IPI00154645;IPI00794613;IPI00793999;IPI00795659;IPI00793927	12	72233487	1.07963	1.4123
OTUD6B	OTU domain-containing protein 6B	IPI00182180;IPI00935722	8	92082424	1.07797	0.624615
AKT1	RAC-alpha serine/threonine-protein kinase	IPI00012866;IPI00440705;IPI00797131;IPI00798192;IPI00790293;IPI00788928	14	105235689	1.07411	1.45732
NAT10	N-acetyltransferase 10	IPI00300127;IPI00921516	11	34127111	1.07252	0.763996
PAICS	Multifunctional protein ADE2	IPI00217223	4	57301915	1.07057	0.978615
CD59	CD59 glycoprotein	IPI00011302	11	33724558	1.06571	0.759148
ARL8B	cDNA FLJ56285, highly similar to ADP-ribosylation factor-like protein 8B	IPI00018871;IPI00940959;IPI00789069;IPI00793455	3	5163905	1.06177	1.14803
REEP3	Receptor expression-enhancing protein 3	IPI00164434;IPI00658022	10	65281123	1.0615	0.620617
POP4	Ribonuclease P protein subunit p29	IPI00032791;IPI00908894	19	30097201	1.05457	0.698954
WIPI1	WD repeat domain phosphoinositide-interacting protein 1	IPI00217556;IPI00658123;IPI00792340	17	66417423	1.05211	0.793084
TFIP11	Tuftelin-interacting protein 11	IPI00015924;IPI00910595;IPI00941082;IPI00220893;IPI00879058;IPI00879557;IPI00879233;IPI00878738;IPI00878423	22	26887191	1.05201	0.657928
VCPIP1	Deubiquitinating protein VCIP135	IPI00064162	8	67540746	1.0516	0.75099
NASP	Nuclear autoantigenic sperm protein	IPI00179953;IPI00332499;IPI00219821;IPI00646459;IPI00639912;IPI00514504	1	46049518	1.04233	0.596232
RAB23	Ras-related protein Rab-23	IPI00008034	6	57053581	1.02881	0.799918
RPP38	Ribonuclease P protein subunit p38	IPI00019195;IPI00655699;IPI00478641	10	15139179	1.02414	0.727831
TRAPPC9	Putative uncharacterized protein TRAPPC9	IPI00181881;IPI00783996;IPI00940268;IPI00790904	8	140742588	1.02137	1.27287
ZC3H11A	Zinc finger CCCH domain-containing protein 11A	IPI00328306;IPI00455725	1	203764782	1.01945	0.852701
OLA1	Obg-like ATPase 1	IPI00916847;IPI00290416;IPI00916410;IPI00216105	2	174937175	1.01944	0.830765
CNPY3	Protein canopy homolog 3	IPI00551062;IPI00844103;IPI00000675	6	42896938	1.01331	0.790149
UQCC	Ubiquinol-cytochrome c reductase complex chaperone CBP3 homolog	IPI00844050;IPI00513896;IPI00922033;IPI00219889;IPI00921976;IPI00396970;IPI00514207;IPI00219890;IPI00556345;IPI00514287;IPI00748809;IPI00922593;IPI00892975;IPI00922163;IPI00385021	20	33890369	1.01264	0.769476
THG1L	Probable tRNA(His) guanylyltransferase	IPI00016559;IPI00908961	5	157158323	1.00853	1.1505
UBA2	SUMO-activating enzyme subunit 2	IPI00023234	19	34919268	1.00809	0.607281
PMVK	Phosphomevalonate kinase	IPI00220648	1	154897210	1.00513	0.720024
TMEM70	Transmembrane protein 70, mitochondrial	IPI00106966;IPI00787239;IPI00759624	8	74888430	0.998204	0.772119
NME1-NME2	Nucleoside diphosphate kinase	IPI00604590;IPI00795292;IPI00026260;IPI00790982;IPI00797082;IPI00790856;IPI00794728	17	49230951	0.996985	0.789936
NDUFB9	NADH dehydrogenase [ubiquinone] 1 beta subcomplex subunit 9	IPI00255052;IPI00790752;IPI00790064;IPI00788862	8	125551343	-1.00895	1.02571
POF1B	Protein POF1B	IPI00103242;IPI00646687;IPI00794787;IPI00871285	X	84532402	-1.00968	0.804879
RBMS2	RNA-binding motif, single-stranded-interacting protein 2	IPI00003706;IPI00922492;IPI00922692	12	56915609	-1.01658	0.986252
ZNF346	Zinc finger protein 346	IPI00442165;IPI00550375;IPI00922764;IPI00922372;IPI00922210;IPI00922384	5	176449697	-1.0311	0.998749
RAC2	Ras-related C3 botulinum toxin substrate 2	IPI00010270;IPI00877663;IPI00879948;IPI00878066;IPI00555566;IPI00012511;IPI00877816;IPI00880127	22	37621301	-1.04288	0.609119
S100A6	Protein S100-A6	IPI00027463	1	153507075	-1.07321	0.78399
NDUFA6	NADH dehydrogenase [ubiquinone] 1 alpha subcomplex subunit 6	IPI00419266	22	42481529	-1.10346	0.836083
LRP1	Prolow-density lipoprotein receptor-related protein 1	IPI00020557;IPI00448904;IPI00788728	12	57522276	-1.12933	0.663352
PLEC1	Plectin-1	IPI00398779;IPI00930582	8	144989321	-1.13335	1.01287
CLTB	Clathrin light chain B	IPI00014589;IPI00216472	5	175819456	-1.15371	0.777591
S100A10	Protein S100-A10	IPI00183695	1	151955391	-1.16429	0.875087
ANXA9	Annexin A9	IPI00008714	1	150954493	-1.20063	0.747028
PLEC1	Plectin-1	IPI00014898;IPI00186711;IPI00398778;IPI00398775;IPI00398776;REV_IPI00025442;REV_IPI00646992;REV_IPI00180781;REV_IPI00011276;REV_IPI00182167;REV_IPI00642832	8	144989321	-1.23017	1.01287
MRPS33	28S ribosomal protein S33, mitochondrial	IPI00654654	7	140705854	-1.28381	0.724512
DKFZp686P03159	Putative uncharacterized protein DKFZp686P03159	IPI00418169;IPI00455315;IPI00334627;IPI00903334;IPI00797556;IPI00909509;IPI00795925;IPI00798111	15	60639333	-1.28401	0.602055
C10orf58	Uncharacterized protein C10orf58	IPI00296190;IPI00646289;IPI00646889;IPI00939991	10	82167585	-1.34424	0.919706
STAT6	Signal transducer and activator of transcription 6	IPI00030782;IPI00792907;IPI00743541	12	57489195	-1.36573	0.716964
PLOD2	Procollagen-lysine,2-oxoglutarate 5-dioxygenase 2	IPI00337495;IPI00472165;IPI00939578	3	145787227	-1.38191	0.638986
ABCB10	ATP-binding cassette sub-family B member 10, mitochondrial	IPI00015826	1	229652329	-1.43553	0.952283
TPM4	Tropomyosin alpha-4 chain	IPI00216975	19	16178317	-1.43991	0.63301
FKBP9	FK506-binding protein 9	IPI00182126;IPI00922428;IPI00878142;IPI00916057	7	32997017	-1.44714	0.596315
HRNR	Hornerin	IPI00398625	1	152184558	-1.44794	0.912944
S100A14	Protein S100-A14	IPI00010214	1	153586731	-1.4538	0.793472
S100A16	Protein S100-A16	IPI00062120	1	153579362	-1.45641	0.769818
KIAA1219	Protein KIAA1219	IPI00409601;IPI00410121;IPI00410120;IPI00748653;IPI00936060	20	37101459	-1.47855	0.778668
SCPEP1	Retinoid-inducible serine carboxypeptidase	IPI00012426;IPI00477895;IPI00789511	17	55055468	-1.49697	0.775813
ASCC2	Activating signal cointegrator 1 complex subunit 2	IPI00549736;IPI00889573;IPI00894241;IPI00452803;IPI00892691;IPI00893854	22	30184597	-1.49833	0.663296
MSI2	RNA-binding protein Musashi homolog 2	IPI00073713;IPI00910884;IPI00792475;IPI00167806;IPI00908857;IPI00455161;IPI00001007;IPI00798190	17	55333931	-1.62438	0.653492
TUBAL3	Tubulin alpha chain-like 3	IPI00015671;IPI00872463;IPI00879904	10	5435061	-1.64	0.874553
KIAA1671	Uncharacterized protein KIAA1671	IPI00396634;IPI00935155	22	25421600	-1.66675	0.714531
MTMR9	Myotubularin-related protein 9	IPI00102580	8	11141984	-1.67653	0.759999
PROCR	Endothelial protein C receptor	IPI00009276	20	33758727	-1.71539	0.839652
DCBLD2	Discoidin, CUB and LCCL domain-containing protein 2	IPI00433138;IPI00419836;IPI00894192;IPI00185191;IPI00796292;IPI00793031;IPI00382681	3	98514785	-1.75358	0.639049
CARS2	Probable cysteinyl-tRNA synthetase, mitochondrial	IPI00336016;IPI00922091	13	111293759	-1.7696	0.822992
SEC14L2	SEC14-like protein 2	IPI00018314;IPI00880099;IPI00922001;IPI00472087;IPI00879191;IPI00877966;IPI00878822;IPI00025260;IPI00894186;IPI00879597;IPI00879542;IPI00879046;IPI00877812;IPI00894555;IPI00893808;IPI00894077;IPI00910204;IPI00879410	22	30792846	-1.79558	0.770795
LAMA3	Laminin alpha-3 chain variant 1	IPI00377045;IPI00790908;IPI00003951;IPI00790353;IPI00895830;IPI00743994;IPI00645984;IPI00647051	18	21269562	-1.80035	1.25693
UPP1	Uridine phosphorylase 1	IPI00004406;IPI00910040;IPI00926240;IPI00925858;IPI00926459	7	48128225	-1.85531	0.692019
SERPINB5	Serpin B5	IPI00783625;IPI00644196;IPI00792875	18	61143994	-1.88827	0.616369
DST	Bullous pemphigoid antigen 1, isoforms 1/2/3/4/5/8	IPI00217992;IPI00217993;REV_IPI00642186;REV_IPI00902637;REV_IPI00007748;REV_IPI00744116;REV_IPI00791843	6	56322785	-2.0615	0.850014
PRKCDBP	Protein kinase C delta-binding protein	IPI00056334;IPI00873579	11	6340176	-2.07743	0.78992
RAB24	Ras-related protein Rab-24	IPI00056496;IPI00383176;IPI00792833	5	176728199	-2.08027	0.764004
TIMP3	Metalloproteinase inhibitor 3	IPI00218247;IPI00640293	22	33197687	-2.09913	0.674228
HMOX1	Heme oxygenase 1	IPI00215893;IPI00877645	22	35776354	-2.43295	0.670647
NDRG1	Protein NDRG1	IPI00022078;IPI00923597;IPI00922016;IPI00796530	8	134249414	-2.43858	0.697766
MICALL1	MICAL-like protein 1	IPI00174962;IPI00878579;IPI00878263;IPI00878088;IPI00877794	22	38301664	-2.51571	0.663775
OPTN	Optineurin	IPI00304189;IPI00554537;IPI00514792;IPI00645442	10	13141449	-3.18531	0.799228
IVL	Involucrin	IPI00011692	1	152881021	-4.94318	0.823896
TGM2	Protein-glutamine gamma-glutamyltransferase 2	IPI00294578;IPI00218251;IPI00218252;IPI00873556;IPI00012876;IPI00873911;IPI00218650	20	36756863	-5.59185	0.915202

## Sheet: del1143
Table S3C: Deleted genes in HCC1143 cells of which the protein levels are either two-fold up or down-regulated.
Gene Names	Protein Names	Protein IDs	Chromosome	Position	Log2 Ratio HCC1143/HMEC protein	Log2 Ratio HCC1143/HMEC Copy number
ACOT9	Acyl-coenzyme A thioesterase 9, mitochondrial	IPI00646015;IPI00220710;IPI00921986;IPI00748985;IPI00639932;IPI00647609	X	23720370	-2.65481	-1.5077
VPS26B	Vacuolar protein sorting-associated protein 26B	IPI00059264	11	134094561	-2.27198	-1.85055
PBRM1	Protein polybromo-1	IPI00384176;IPI00910435;IPI00301041;IPI00909142;IPI00334894;IPI00873041;IPI00023097;IPI00640304;IPI00916875;IPI00917738;IPI00915955;IPI00398781;IPI00916608;IPI00917348;IPI00847477;IPI00917316;IPI00917875;IPI00918010;IPI00788643;IPI00917187	3	52579368	-2.13969	-2.17217
PIR	Pirin	IPI00012575	X	15402921	-2.02303	-1.40852
EBP	3-beta-hydroxysteroid-Delta(8),Delta(7)-isomerase	IPI00008599;IPI00643669;IPI00642218	X	48379546	-1.85182	-1.75981
RAB9A	Ras-related protein Rab-9A	IPI00016372;REV_IPI00100796	X	13707244	-1.76125	-1.4077
MID1IP1	Mid1-interacting protein 1	IPI00009730	X	38660685	-1.58103	-1.46189
NOMO2	Nodal modulator 2	IPI00465432;IPI00333985;IPI00413732;IPI00329352;IPI00872411	16	18511182	-1.37937	-1.28372
IMPDH1	IMP (Inosine monophosphate) dehydrogenase 1	IPI00375527;IPI00856084;IPI00442268;IPI00644730;IPI00940243;IPI00916697;IPI00916378;IPI00647813	7	128032331	-1.35788	-1.42344
CD99	CD99 antigen	IPI00253036;IPI00642948;IPI00644034;IPI00220117	X	2609220	-1.1739	-1.53199
DYNLT3	Putative uncharacterized protein DYNLT3	IPI00639982;IPI00020885;IPI00644278	X	37696010	-1.1086	-1.33283
CASK	Peripheral plasma membrane protein CASK	IPI00514301;IPI00555605;IPI00641315;IPI00937304;IPI00877929;IPI00646452;IPI00877806;IPI00644270	X	41374187	-0.997141	-1.44139
WASF2	Wiskott-Aldrich syndrome protein family member 2	IPI00472164;IPI00002647;IPI00299003;IPI00384347	1;X	27730730	0.998029	-1.20725
FAM3C	Protein FAM3C	IPI00334282;IPI00926250;IPI00925923;IPI00926128	7	120988905	1.0852	-1.31818
TBL1X	F-box-like/WD repeat-containing protein TBL1X	IPI00640917;IPI00218132;IPI00020873	X	9431335	1.11537	-1.64226
MED14	Mediator of RNA polymerase II transcription subunit 14	IPI00297191;IPI00646675;IPI00644871	X	40507558	1.20822	-1.7102
PDK3	cDNA FLJ60191, highly similar to Pyruvate dehydrogenase (lipoamide) kinase isozyme 3 (EC 2.7.11.2)	IPI00915357;IPI00014849	X	24483338	1.21345	-1.55512
RANBP1	Ran-specific GTPase-activating protein	IPI00414127;IPI00878075;IPI00878611;IPI00879666;IPI00399212;IPI00878950;IPI00878440;IPI00878795	22	20103461	1.29747	-1.4289
METTL1	tRNA (guanine-N(7)-)-methyltransferase	IPI00915008;IPI00290184;IPI00792463;IPI00853470;IPI00793642;IPI00794208	12	58162254	1.45266	-1.42093
CKS1B	Cyclin-dependent kinases regulatory subunit 1	IPI00015104;IPI00413006;IPI00514250;IPI00794756;IPI00643512	1;X	154947129	2.49413	-1.48599
DMD	Dystrophin	IPI00006091;IPI00472316;IPI00304639;IPI00375141;IPI00304638;IPI00220577;IPI00334618;IPI00335579;IPI00376366;IPI00184337;IPI00376375;IPI00872706;IPI00334178;IPI00184813;IPI00376367;IPI00419537;IPI00376374;IPI00647524;IPI00002386	X	31132808	3.57877	-1.46727

## Sheet: del2218
Table S3D: Deleted genes in HCC2218 cells of which the protein levels are either two-fold up or down-regulated.
Gene Names	Protein Names	Protein IDs	Chromosome	Position	Log2 Ratio HCC2218/HMEC protein	Log2 Ratio HCC2218/HMEC Copy number
DPYSL2	Dihydropyrimidinase-related protein 2	IPI00257508	8	26371842	-6.81614	-1.00781
PLOD2	Procollagen-lysine,2-oxoglutarate 5-dioxygenase 2	IPI00337495;IPI00472165;IPI00939578	3	145787227	-6.79767	-1.0371
DHRS3	Short-chain dehydrogenase/reductase 3	IPI00006250;IPI00432717;IPI00641331	1	12627939	-5.88652	-1.06615
CTSB	Cathepsin B	IPI00295741;IPI00909303;IPI00941296;IPI00788996	8	11700033	-4.60309	-1.05546
EIF2A	Eukaryotic translation initiation factor 2A	IPI00012462;IPI00939283;IPI00795312	3	150264465	-4.064	-1.13102
PTK2B	Protein tyrosine kinase 2 beta	IPI00029702;IPI00216435;IPI00793811;IPI00443767	8	27168999	-3.53647	-1.08318
CDH1	E-cadherin	IPI00744889;IPI00025861;IPI00000513;IPI00911003	16	68771128	-3.04146	-3.06596
MSRA	Peptide methionine sulfoxide reductase	IPI00006592;IPI00796388;IPI00940503;IPI00794951;IPI00922312;IPI00795498	8	9911778	-2.3407	-1.14337
WDR1	WD repeat-containing protein 1	IPI00746165;IPI00873622;IPI00216256;IPI00939854;IPI00903292;IPI00909688;IPI00940664;IPI00556374;IPI00747236	4	10075964	-2.21617	-1.06666
LYAR	Cell growth-regulating nucleolar protein	IPI00015838	4	4269431	-2.19231	-1.00334
DOCK5	Dedicator of cytokinesis protein 5	IPI00792788;IPI00746684;IPI00917443;IPI00816677;IPI00022449;IPI00916073	8	25042238	-2.18793	-1.03557
FDFT1	Squalene synthetase	IPI00020944;IPI00908715;IPI00797743;IPI00909973;IPI00789762;IPI00796512;IPI00798406	8	11660164	-2.18607	-1.04197
GSTO1	Glutathione S-transferase omega-1	IPI00019755;IPI00642936;IPI00513927	10	105995114	-2.1605	-1.09621
ATP1B3	Sodium/potassium-transporting ATPase subunit beta-3	IPI00008167;IPI00787965;IPI00793333;IPI00788784;IPI00789521;IPI00787149;IPI00790573	3	141594966	-1.87565	-1.09646
AGRN	Agrin	IPI00374563;IPI00514026;IPI00939142	1	955503	-1.80703	-1.03032
SSR3	Translocon-associated protein subunit gamma	IPI00009235	3	156257929	-1.80021	-1.04028
CCDC25	Coiled-coil domain-containing protein 25	IPI00396174;IPI00939326;IPI00797903;IPI00793427;IPI00791694;IPI00477220;IPI00796594	8	27590835	-1.77362	-1.03998
PDIA5	Protein disulfide-isomerase A5	IPI00031479;IPI00796113;IPI00791364;IPI00792483	3	122785909	-1.68264	-1.03347
MTMR6	Myotubularin-related protein 6	IPI00329385;IPI00923409;IPI00844145;IPI00470949;IPI00514581	13	25820339	-1.62884	-1.114
ESD	S-formylglutathione hydrolase	IPI00411706;IPI00641040;IPI00645836	13	47345391	-1.47351	-1.02765
MBNL1	Muscleblind-like protein 1	IPI00021692;IPI00384261;IPI00020062;IPI00647219;IPI00219790;IPI00219792;IPI00654643	3	151961617	-1.45955	-1.04543
DNAJC13	DnaJ homolog subfamily C member 13	IPI00307259;IPI00830029;IPI00410315	3	132136370	-1.45227	-1.00339
ITGB5	Integrin beta-5	IPI00029741;IPI00790921;IPI00789162;IPI00794350	3	124480795	-1.4442	-1.06825
SUGT1	Suppressor of G2 allele of SKP1 homolog	IPI00828150;IPI00791573;IPI00001672	13	53226844	-1.32753	-1.03981
SLC7A1	High affinity cationic amino acid transporter 1	IPI00027728;IPI00646503	13	30083547	-1.30481	-1.01304
KPNA3	Importin subunit alpha-3	IPI00299033;IPI00643131	13	50273447	-1.18254	-1.02931
MAP2K4	Dual specificity mitogen-activated protein kinase kinase 4	IPI00942214;IPI00024674;IPI00794157	17	11924141	-1.14625	-1.02103
PTPLB	Protein-tyrosine phosphatase-like member B	IPI00384497	3	123209667	-1.1448	-1.01579
GTPBP10	GTP-binding protein 10	IPI00167638;IPI00217526;IPI00791894;IPI00792449;IPI00926915	7	89964537	1.01219	-1.02311
SMPDL3B	Acid sphingomyelinase-like phosphodiesterase 3b	IPI00550115;IPI00386427;IPI00908315;IPI00514631	1	28261504	1.19939	-0.999842
MRPL3	cDNA FLJ51883, highly similar to Mitochondrial 39S ribosomal protein L3	IPI00795627;IPI00012353;IPI00794210;IPI00793640;IPI00791539;IPI00793817;IPI00794965	3	131181046	1.29337	-1.05143
CRYL1	Lambda-crystallin homolog	IPI00006443;IPI00645031;IPI00909277	13	20977806	1.40792	-1.02052
POMP	Proteasome maturation protein	IPI00006377	13	29233241	1.41868	-1.09737
ASAH1	N-acylsphingosine amidohydrolase 1	IPI00940046	8	17913925	1.4964	-1.02751
CHD3	Chromodomain-helicase-DNA-binding protein 3	IPI00465222;IPI00937706;IPI00373870;IPI00411592;IPI00910580;IPI00879443;IPI00879130	17	7788124	1.67867	-0.997225
CAB39L	Calcium-binding protein 39-like	IPI00026359;IPI00514062;IPI00844534;IPI00916547;IPI00917474;IPI00916672	13	49882786	3.50483	-1.04118
MAPT	Microtubule-associated protein tau	IPI00025499;IPI00220175;IPI00220174;IPI00026836;IPI00220173;IPI00220171;IPI00217976;IPI00747283;IPI00293683	17	43971750	5.36089	-1.04403
