# Supplementary material for: Proteomic Changes Resulting from Gene Copy Number Variations in Cancer Cells
Source: PLoS Genet. 2010 Sep 2;6(9):e1001090. doi: 10.1371/journal.pgen.1001090 (PMC2932691; doi:10.1371/journal.pgen.1001090)
Supplement: Table S4 — Complete protein table. (2.39 MB XLS) [file pgen.1001090.s006.xls]

## Sheet: proteinGroups
Supplementary Table 4: Protein ratios of HCC1143, HCC2218 and HMEC vs. heavy labeled MCF7 cells. Ratios are given for three biological replicates. PEP-posterior error probability
Protein IDs	Protein Names	Gene Names	Peptides	Unique Peptides	Sequence Coverage [%]	Mol. Weight [kDa]	Sequence Length	PEP	Ratio HCC1143/SILAC replicate 1	Ratio HCC1143/SILAC replicate 2	Ratio HCC1143/SILAC replicate 3	Ratio HCC2218/SILAC replicate 1	Ratio HCC2218/SILAC replicate 2	Ratio HCC2218/SILAC replicate 3	Ratio HMEC/SILAC replicate 1	Ratio HMEC/SILAC replicate 2	Ratio HMEC/SILAC replicate 3
IPI00900332	AIG2-like domain-containing protein 1	A2LD1	1	1	6.5	17.328	153	0.00023232		0.629525
IPI00478003;IPI00789547	Alpha-2-macroglobulin	A2M	9	2	7.5	163.28	1474	2.4049e-32									6.00384
IPI00419215;IPI00792146;IPI00790859	Alpha-2-macroglobulin-like protein 1	A2ML1	6	6	5	161.1	1454	3.5204e-100	7.98021							2.33498
IPI00024143;IPI00747361;IPI00793524;IPI00794723;IPI00791584;IPI00792670	Aladin	AAAS	8	8	17.8	59.573	546	9.1541e-57	0.946611	1.30246	0.926441	1.38831	2.6683	1.32494	0.976372		0.726216
IPI00217272;IPI00646775;IPI00789348;IPI00790421;IPI00908814;IPI00334184	Acetoacetyl-CoA synthetase	AACS	22	20	38.5	75.143	672	3.0726e-214	0.885583	0.630955	0.980777	0.774234	0.622161	0.817929	0.668494	0.707464	0.739317
IPI00924788;IPI00002230;IPI00925612;IPI00790972;IPI00927596	Arylacetamide deacetylase-like 1	AADACL1	13	13	39.1	49.881	448	1.759e-240	6.94203	5.60224	9.3985	1.03193	1.11893	1.43084	2.29289	2.64368	3.31312
IPI00916402;IPI00479760;IPI00916534;IPI00337426;IPI00033606;IPI00412057	AP2-associated protein kinase 1	AAK1	10	10	14.5	103.88	961	5.1659e-126	2.43173	1.80806	2.10535		1.42998	1.28753	3.32292	4.07034	4.62
IPI00927731;IPI00014481;IPI00924477;IPI00924705;IPI00925243	Angio-associated migratory cell protein	AAMP	6	6	18.9	46.821	435	5.2796e-154	0.875733	1.1736	0.761847	0.71582	1.05718		0.705965	0.579206	0.28962
IPI00027442;IPI00910701;IPI00552860	Alanyl-tRNA synthetase, cytoplasmic	AARS	51	51	63.7	106.81	968	0	0.472612	0.396542	0.472679	0.238282	0.220085	0.289201	0.295919	0.436491	0.39398
IPI00394788	Probable alanyl-tRNA synthetase, mitochondrial	AARS2	14	13	16.9	107.34	985	2.3634e-34	1.57495		1.29109	1.89538		2.00719	0.622007	0.8371	1.02678
IPI00748490;IPI00914584;IPI00916940;IPI00917638;IPI00917260;IPI00916173	cDNA FLJ36765 fis, clone 3NB691000191	AARSD1	8	8	16.2	65.701	586	1.6105e-60	1.0447	1.01839	0.817461	1.33876	1.07292	1.50587	1.71969	2.0382	2.5362
IPI00250297	L-aminoadipate-semialdehyde dehydrogenase-phosphopantetheinyl transferase	AASDHPPT	8	8	27.2	35.776	309	1.0775e-72	1.35704	1.3195	1.40078	1.33813	1.22246	1.76816	1.48003	1.80057	1.79263
IPI00033217;IPI00924639;IPI00926352	Alpha-aminoadipic semialdehyde synthase, mitochondrial	AASS	2	2	3.6	102.13	926	4.5178e-31
IPI00302238	Protein AATF	AATF	4	4	14.5	63.132	560	7.6159e-05			0.772798			0.997307
IPI00009532	4-aminobutyrate aminotransferase, mitochondrial	ABAT	14	14	41.6	58.228	515	0	0.0692425	0.136054	0.0645078	0.28816	0.296235	0.174383	0.229437	0.285258	0.363782
IPI00939572;IPI00782981;IPI00457109	ATP-binding cassette sub-family A member 12	ABCA12	1	1	0.5	293.37	2597	0.0092317
IPI00619902;IPI00017800	ABCA3 variant protein	ABCA3 variant protein	2	2	1.5	191.32	1708	0.00042208						4.2613
IPI00015826	ATP-binding cassette sub-family B member 10, mitochondrial	ABCB10	5	4	6.5	79.147	738	1.1763e-25	0.283696	0.40803	0.621736		5.16236	3.48602	0.811359	1.59724	1.10364
IPI00556553;IPI00306748	ATP-binding cassette sub-family B member 7, mitochondrial	ABCB7	11	11	18.6	82.768	753	4.5734e-89	2.39981	1.49249	2.49744	2.11515		2.26557	0.76599	0.936067	1.27118
IPI00019022;IPI00719730;IPI00383931;IPI00443945	ATP-binding cassette sub-family B member 8, mitochondrial	ABCB8	7	6	11.3	79.988	735	5.6474e-109					1.99577	2.16549	0.449822
IPI00719178;IPI00014985;IPI00008463;IPI00008465;IPI00008338;IPI00216263;IPI00216265;IPI00216262;IPI00216264;IPI00216266;IPI00216267	Multidrug resistance-associated protein 1	ABCC1	14	14	11.1	172.61	1541	2.596e-39	0.546597	0.572377	0.475873	0.756716	0.663922	0.674309	0.831947	1.36636	1.46789
IPI00023868	Canalicular multispecific organic anion transporter 1	ABCC2	2	2	2.2	174.19	1545	4.645e-06
IPI00006674;IPI00219844;IPI00251066	Canalicular multispecific organic anion transporter 2	ABCC3	11	10	10	169.34	1527	2.8437e-22				1.15038	3.19642	1.56752	0.446808
IPI00006675;IPI00908369;IPI00867698	Multidrug resistance-associated protein 4	ABCC4	3	3	3.5	149.52	1325	3.3969e-29			3.60568				0.56262
IPI00385383;IPI00917215;IPI00792522;IPI00555898;IPI00795367	Multidrug resistance-associated protein 5	ABCC5	6	6	5.3	160.66	1437	1.3376e-14	0.548878	0.409266		1.37076	1.63763				0.265372
IPI00908804;IPI00002372;IPI00185503;IPI00884932	cDNA FLJ53353, highly similar to ATP-binding cassette sub-family D member 3	ABCD3	17	17	30.6	78.459	683	1.836e-108	2.94724	1.82739	1.90647	5.76435	5.95415	4.20327	4.70721	7.52785	4.44998
IPI00303207	ATP-binding cassette sub-family E member 1	ABCE1	36	36	58.6	67.314	599	0	0.690942	0.607866	0.699154	1.03994	1.07399	1.13917	1.12672	1.15986	1.15043
IPI00873899;IPI00013495;IPI00792186;IPI00642673;REV_IPI00017443	ATP-binding cassette sub-family F member 1	ABCF1	31	29	43.8	95.925	845	0	0.970026	0.825083	0.958589	0.771545	0.620578	0.698666	0.630636	0.6027	0.676911
IPI00068506;IPI00005045;IPI00925351	ATP-binding cassette, sub-family F (GCN20), member 2, isoform CRA_d	ABCF2	36	36	50	72.443	634	0	0.369154	0.44837	0.354937	0.56427	0.462684	0.34825	0.368039	0.304183	0.228864
IPI00465160;IPI00784776;IPI00796877;IPI00925546;IPI00796248;IPI00793766;IPI00791867;IPI00925118;IPI00794398	ATP-binding cassette sub-family F member 3	ABCF3	17	17	32.6	79.744	709	6.7874e-120	0.821828	0.81473	0.735781	0.787898	0.750075	0.575639	0.701853	0.641766	0.64288
IPI00414196;IPI00024089;IPI00220758;IPI00220759;IPI00220760;IPI00220762;IPI00333761;IPI00335646;IPI00916852;IPI00916677;IPI00790641	ATP-binding cassette sub-family G member 1	ABCG1	2	2	2.4	90.862	824	2.8575e-10			0.699692	1.14859	0.940734	2.58471		0.504592	0.629802
IPI00298214;IPI00607625	ATP-binding cassette sub-family G member 2	ABCG2	3	3	5.8	72.313	655	2.095e-06			0.167991			0.270944	0.295814
IPI00020075;IPI00790966	Abhydrolase domain-containing protein 10, mitochondrial	ABHD10	13	13	54.6	33.932	306	1.9906e-247	1.39809	1.06496	1.69627	0.789204	0.511352	0.904486	0.589797	0.903587	1.23796
IPI00171692;IPI00171152;IPI00922889;IPI00926786;IPI00927072;IPI00170896;IPI00922400;IPI00925250;IPI00171691;IPI00167072	Abhydrolase domain-containing protein 11	ABHD11	13	13	73.3	34.69	315	4.4966e-215	0.331268	0.29118	0.356011	1.29673	0.991277	1.36515	0.249457	0.255017	0.301586
IPI00060569;IPI00394779;IPI00930555;IPI00514906	Monoacylglycerol lipase ABHD12	ABHD12	17	17	48.3	45.558	404	9.7506e-165	0.52021	0.477737	0.688421	1.70436	1.19815	1.53946	0.30773	0.293832	0.261424
IPI00063827;IPI00910706;IPI00747859;IPI00910875;IPI00908954	Abhydrolase domain-containing protein 14B	ABHD14B	7	5	42.9	22.345	210	7.6693e-107	0.637511	0.675813	1.2578	1.9308	2.00767	2.64389	0.574614	1.00728	1.64476
IPI00167615	Abhydrolase domain-containing protein 14B	ABHD14B	3	1	23.8	18.046	172	2.4092e-48
IPI00290979;IPI00924781	1-acylglycerol-3-phosphate O-acyltransferase ABHD5	ABHD5	3	3	11.5	39.095	349	0.00033343					1.45843
IPI00431034;IPI00827857;IPI00431030;IPI00480028;IPI00431025;IPI00431031;IPI00647003;IPI00431027;IPI00431029;IPI00431026;IPI00431032;IPI00431033;IPI00935670;IPI00902865;IPI00909287;IPI00299588;IPI00925454;IPI00921994;IPI00908332	Putative uncharacterized protein ABI1	ABI1	14	10	47.7	52.646	482	1.3878e-275	3.14456	2.65048	2.88692	1.33113	0.941531	1.47054	1.60663	1.3887	1.85189
IPI00442210;IPI00925810;IPI00925186;IPI00924519;IPI00442211;IPI00442214;IPI00937657;IPI00926717;IPI00926527;IPI00927138	Abl interactor 2	ABI2	5	1	9	55.663	513	1.0162e-24
IPI00221171;IPI00216969;IPI00941559;IPI00896389;IPI00829893	Proto-oncogene tyrosine-protein kinase ABL1	ABL1	6	6	7.8	124.95	1149	3.8179e-16	1.19263	0.753012	0.997506	1.25415		1.17676		0.985416	0.768167
IPI00515115;IPI00329495;IPI00747332;IPI00456617;IPI00940368;IPI00455786;IPI00922144;IPI00943221;IPI00873424;IPI00644747	Putative uncharacterized protein ABLIM1	ABLIM1	7	2	12.2	95.526	846	1.9967e-21				4.99725	11.7169	3.87552			5.98193
IPI00883638;IPI00551038;IPI00647060;IPI00744789;IPI00937791;IPI00552818	Putative uncharacterized protein ABLIM1	ABLIM1	6	1	20.4	52.055	455	8.9434e-19				5.79945
IPI00420082;IPI00921878;IPI00940862;IPI00871563	Histo-blood group ABO system transferase	ABO	1	1	4.2	40.933	354	0.0014038
IPI00030389;IPI00298955;IPI00930680;IPI00872392;IPI00922743	Active breakpoint cluster region-related protein	ABR	12	11	20	97.696	859	1.4251e-78	1.3841	1.00521	1.63476	0.721813	0.527232		1.03566	1.16962	1.4555
IPI00012828;IPI00927496;IPI00926442;IPI00303933;IPI00926669;IPI00925964;IPI00796781;IPI00793428;IPI00011522;IPI00924606;IPI00789589	3-ketoacyl-CoA thiolase, peroxisomal	ACAA1	16	8	59.2	44.292	424	0	1.29917	1.33932	1.60387	1.92426	1.71866	2.15997	0.935279	1.12506	1.40643
IPI00873829;IPI00001539	Putative uncharacterized protein ACAA2	ACAA2	17	17	55.4	41.928	397	0	0.380127	0.576535	0.453268	2.53775	2.32742	4.03258	0.503271	0.594354	1.06373
IPI00396015;IPI00942045;IPI00011569;IPI00847501;IPI00396018;IPI00793409;IPI00793750;IPI00472339;IPI00796157;IPI00796495	Acetyl-CoA carboxylase 1	ACACA	71	61	36.3	270	2383	0	0.471832	0.305782	0.381592	0.662603	0.937998	1.03613	1.63677	2.18938	1.7353
IPI00872885;IPI00013003;IPI00157056;IPI00848209	Putative uncharacterized protein ACACB	ACACB	20	10	10.2	279.28	2484	3.4375e-135				19.8598	4.37254	10.741
IPI00914926;IPI00418639;IPI00843833;IPI00794149;IPI00797832;IPI00843880	Acyl-CoA dehydrogenase family member 10	ACAD10	3	3	2.8	122.34	1090	3.5749e-05			0.556235						4.36548
IPI00420065;IPI00795974;IPI00796584	Acyl-CoA dehydrogenase family member 11	ACAD11	2	2	2.6	87.282	780	0.00013569									3.60959
IPI00747159;IPI00922810;IPI00446874	Isobutyryl-CoA dehydrogenase, mitochondrial	ACAD8	1	1	2.4	45.069	415	0.0041865
IPI00152981;IPI00790834;IPI00789507;IPI00790269;IPI00910925;IPI00790871	Acyl-CoA dehydrogenase family member 9, mitochondrial	ACAD9	21	21	38.6	68.76	621	1.2427e-213	1.0254	0.843526	1.10904	0.622704	0.545286	0.525652	0.596054	0.83668	0.898715
IPI00027701;IPI00909944;IPI00794829	Short-chain specific acyl-CoA dehydrogenase, mitochondrial	ACADS	3	3	11.2	44.297	412	4.4007e-06		0.873134	2.94855						0.62348
IPI00024623;IPI00514033	Short/branched chain specific acyl-CoA dehydrogenase, mitochondrial	ACADSB	21	21	54.6	47.485	432	0	0.737681	0.347633	0.626566	41.5282	53.0026	40.6223		0.763592	0.859771
IPI00028031;IPI00178744;IPI00937735;IPI00793599;IPI00796120	cDNA FLJ56425, highly similar to Very-long-chain specific acyl-CoAdehydrogenase, mitochondrial (EC 1.3.99.-)	ACADVL	32	32	57.2	75.209	701	0	1.81729	1.451	2.90605	1.76647	1.28702	1.82076	0.945895	1.06384	2.20075
IPI00014264;IPI00927062;IPI00927454;IPI00795932;IPI00926835;IPI00550459;IPI00465167;IPI00643360;IPI00926085;IPI00797878;IPI00796588;IPI00926639	ARFGAP with coiled-coil, ANK repeat and PH domain-containing protein 2	ACAP2	12	12	17.1	88.028	778	7.467e-81	1.14449	1.1947	1.45207		0.449782	0.588339	0.563126	0.657073	0.893895
IPI00030363;IPI00440499;IPI00062003	Acetyl-CoA acetyltransferase, mitochondrial	ACAT1	21	21	66.5	45.199	427	0	0.919118	0.923446	1.053	2.58244	2.2243	4.34197	0.770951	1.03651	1.30893
IPI00291419;REV_IPI00478703;REV_IPI00654566	Acetyl-CoA acetyltransferase, cytosolic	ACAT2	17	16	56.3	44.642	426	0	1.44236	0.9999	1.48258	0.509502	0.540511	0.68956	1.20773	1.82668	1.90382
IPI00009315	Golgi resident protein GCP60	ACBD3	18	18	41.3	60.593	528	0	1.57527	1.40382	1.43072	4.01091	4.97711	4.70655	1.15457	1.17958	1.52286
IPI00186681;IPI00550377;IPI00644427;IPI00640010;IPI00922096;IPI00643997;IPI00646700	Acyl-CoA-binding domain-containing protein 5	ACBD5	8	8	17	60.091	534	2.2613e-19	1.6152		1.78952	1.43637	1.87748	1.79404		2.49078	0.570288
IPI00031680	Acyl-CoA-binding domain-containing protein 6	ACBD6	2	2	6.7	31.15	282	0.00099667	0.83696		0.654707	1.00969	1.22128		1.97328		1.2431
IPI00872663;IPI00398874	Putative uncharacterized protein ACBD7	ACBD7	1	1	15.9	9.7581	88	7.9709e-16
IPI00007334;IPI00215975;IPI00297991	Apoptotic chromatin condensation inducer in the nucleus	ACIN1	21	3	17.4	151.89	1341	6.1071e-66	1.63332	0.988533	0.892937	0.709874		0.809389	1.28864	0.834585	0.693241
IPI00021290;IPI00939422;IPI00935456	ATP-citrate synthase	ACLY	65	4	53.8	120.84	1101	0	0.641272	0.48998	0.604303	0.613874	0.807168	0.924471	2.37722	2.61035	2.5062
IPI00394838	cDNA FLJ56442, highly similar to ATP-citrate synthase (EC 2.3.3.8)	ACLY variant protein	62	1	50.5	125.14	1145	0						26.3324
IPI00008485;IPI00643595;IPI00930318	Cytoplasmic aconitate hydratase	ACO1	28	28	37.3	98.398	889	0	2.2238	1.74007	2.45074	1.63677	1.41002	2.61301	1.97957	1.91858	3.64153
IPI00017855;IPI00790739;IPI00909879	Aconitate hydratase, mitochondrial	ACO2	49	33	73.8	85.424	780	0	0.850991	0.629366	1.17158	1.80832	0.884173	1.86543	0.460872	0.649815	1.09374
IPI00382844;REV_IPI00157908	Aconitase	ACON	18	1	38.2	65.347	600	0
IPI00020530;IPI00930594	Acyl-coenzyme A thioesterase 13	ACOT13	6	6	44.3	14.96	140	1.4781e-148	0.643749	0.584932	0.814531	3.83509	2.66823	5.56948	0.988045	1.05017	2.31658
IPI00220906;IPI00333838;IPI00922628;IPI00513928;IPI00930396	Acyl-coenzyme A thioesterase 2, mitochondrial	ACOT2	8	8	21.1	53.237	483	1.1735e-21			1.32988	0.407647			1.24493	2.0989	2.04311
IPI00010415;IPI00395748;IPI00219451;IPI00445888	Cytosolic acyl coenzyme A thioester hydrolase	ACOT7	17	1	58.9	41.796	380	0	2.15661	1.70958	2.4937	0.483582	0.334079	0.370508	2.606	2.97221	3.60555
IPI00219452	Cytosolic acyl coenzyme A thioester hydrolase	ACOT7	17	1	66	36.567	329	1.5248e-301
IPI00746126;IPI00883762;IPI00395469	Cytosolic acyl coenzyme A thioester hydrolase	ACOT7	13	1	65	30.977	283	0
IPI00298202;IPI00373836;IPI00908749;IPI00877054;IPI00909572;IPI00643265;IPI00871999	Acyl-coenzyme A thioesterase 8	ACOT8	6	6	21.3	35.914	319	8.4661e-84	0.693866	0.588685	0.932836	1.48573	0.832986	1.60823	0.377344	0.308299	0.556669
IPI00646015;IPI00220710;IPI00921986;IPI00748985;IPI00639932;IPI00647609	Acyl-coenzyme A thioesterase 9, mitochondrial	ACOT9	16	16	42	50.85	448	6.7711e-165	0.610799	0.421319	0.883158	1.27074	0.818063	1.31427	2.77731	3.8466	4.78103
IPI00296907;IPI00477729	Peroxisomal acyl-coenzyme A oxidase 1	ACOX1	23	23	44.4	74.423	660	0	1.09004	1.04742	1.12278	0.869338	0.887942	1.0796	0.620078	0.720929	0.471832
IPI00020226;IPI00827610	Peroxisomal acyl-coenzyme A oxidase 3	ACOX3	8	8	15.7	77.628	700	2.3511e-53	0.610762	0.290706		3.67094	7.07014	4.92732		1.53636	3.45066
IPI00219861;IPI00759646;IPI00893203;IPI00218847;IPI00410615;IPI00382703;IPI00936586;IPI00935343;IPI00892543	Low molecular weight phosphotyrosine protein phosphatase	ACP1	9	9	47.5	18.042	158	1.6609e-113	1.11307	1.09854	1.27496	0.787464	0.860141	1.052	0.793588	0.846883	0.981451
IPI00003807;IPI00925377;IPI00909518;IPI00922425	Lysosomal acid phosphatase	ACP2	5	5	12.1	48.344	423	1.1815e-28	0.531576	0.597872	0.583908		1.34736	1.74819	1.05137	1.06816
IPI00099838;IPI00556344	Lysophosphatidic acid phosphatase type 6	ACP6	3	3	8.9	48.886	428	5.1259e-64	0.677553	0.697934	0.970214	1.84257	1.86961	2.36911	0.321048	0.245272	0.292757
IPI00909579;IPI00304071	cDNA FLJ51819, weakly similar to Long-chain-fatty-acid--CoA ligase (EC 6.2.1.3)	ACSF2	22	22	42.3	70.622	640	0	1.2591	0.928591	1.26373	7.82411	8.88099	10.5546	0.244547	0.347198	0.432021
IPI00166395;IPI00450347;IPI00645533	Acyl-CoA synthetase family member 3, mitochondrial	ACSF3	10	10	22.7	64.113	576	9.4626e-53	0.419639	0.348541	0.434953	1.15036	0.635284	1.42491	0.715256	0.584419	0.754831
IPI00012728;IPI00942534;IPI00401448;IPI00815946;IPI00658107;IPI00657883;IPI00879209;IPI00874262;IPI00296333;IPI00939479;IPI00940097;IPI00657816;IPI00384110;IPI00401990;IPI00008037;IPI00854706;IPI00411387	Long-chain-fatty-acid--CoA ligase 1	ACSL1	28	28	39.8	77.942	698	2.6032e-175	3.08794	1.541	1.73166	4.62321	5.84283	4.70765	1.38566	3.33422	2.49066
IPI00031397;IPI00916819;IPI00917636	Long-chain-fatty-acid--CoA ligase 3	ACSL3	36	33	59.9	80.419	720	0	1.95737	1.33958	1.99653	0.572738	0.455145	0.515092	3.06833	3.84069	3.66959
IPI00029737;IPI00219897;IPI00908902	Long-chain-fatty-acid--CoA ligase 4	ACSL4	11	8	17.7	79.187	711	6.4772e-130							26.1883	27.2777	6.79486
IPI00216932;IPI00248961	Acetyl-coenzyme A synthetase 2-like, mitochondrial	ACSS1	1	1	2.8	74.856	689	0.00034495
IPI00549564;IPI00413730;IPI00873455;IPI00909325;IPI00032898	Acyl-CoA synthetase short-chain family member 2	ACSS2	19	18	32.6	80.087	714	2.0976e-147	3.46272	2.90698	4.26821	1.33057	1.64466	2.30963	2.7994	7.18959	5.45108
IPI00555809	Actin-like protein	ACT	2	1	12.6	25.854	230	2.3034e-24	1.3076			1.056
IPI00937995	Actin-like protein	ACT	3	1	19.4	11.532	103	1.1816e-12
IPI00008603;IPI00025416;IPI00878173;IPI00916212;IPI00927545;IPI00921887;IPI00645534;IPI00917820;IPI00917457;IPI00917282	Actin, aortic smooth muscle	ACTA2	32	1	74.8	42.009	377	0	1.31411	1.54943	3.6665	1.30063	1.48624	1.26813	2.08381	2.38989	2.59997
IPI00003269	Beta-actin-like protein 2	ACTBL2	13	1	27.7	42.003	376	9.5098e-161	1.12966	1.61621	2.0059	1.34528	1.59985	1.65525	2.21981		2.77162
IPI00021440;IPI00930226;IPI00790339;IPI00796881	Actin, cytoplasmic 2	ACTG1	45	2	91.2	41.792	375	0	0.917515	1.3264	1.69222	1.24145	1.32605	1.2775	2.0829	2.26224	2.42819
IPI00003627;IPI00216622;IPI00792088;IPI00007776;IPI00793214	Actin-like protein 6A	ACTL6A	10	9	35.4	47.46	429	1.7562e-175	1.68648	1.55094	1.23232	0.757289	0.861772	0.789079	0.939144	0.829531	0.62901
IPI00013508;IPI00759776;IPI00909239;IPI00921118;IPI00936352;IPI00032137;IPI00910616	Alpha-actinin-1	ACTN1	77	46	77.1	103.06	892	0	2.41022	2.98427	3.64232	0.342466	0.358205	0.29777	4.73216	4.81696	5.93366
IPI00019884	Alpha-actinin-2	ACTN2	19	2	18.3	103.85	894	5.3864e-253
IPI00013808;IPI00845465;IPI00908458;IPI00908776;IPI00942539	Alpha-actinin-4	ACTN4	85	54	83.1	104.85	911	0	3.49101	5.8214	5.61073	1.06891	1.62367	0.96609	4.0853	4.60342	3.82673
IPI00302690;REV_IPI00173642;REV_IPI00477038	Actin-related protein 10	ACTR10	8	7	23.7	46.306	417	6.0614e-39	1.46737	0.890551	1.49555	1.04812	1.23353	1.79892	2.01983	2.25846	2.33274
IPI00029468;IPI00908883	Alpha-centractin	ACTR1A	21	10	59.3	42.613	376	0	1.73433	1.39251	1.69311	1.21588	1.67218	1.50453	2.57951	2.60037	3.45495
IPI00029469;IPI00917682	Beta-centractin	ACTR1B	15	4	42.8	42.293	376	1.7774e-230		0.789952	1.54768				0.868432	1.1969	1.8615
IPI00470573;IPI00005159;IPI00176593;IPI00909247	cDNA FLJ51656, highly similar to Actin-like protein 2	ACTR2	21	21	46.6	45.376	399	0	1.84254	1.99175	2.16389	1.12139	1.02404	1.23495	2.36972	2.96024	3.00616
IPI00028091;IPI00908396;IPI00916540;IPI00916399	Actin-related protein 3	ACTR3	30	26	78.5	47.371	418	0	1.76797	1.53744	2.06016	1.0923	0.963391	1.16735	2.51509	3.07069	3.16126
IPI00007068;IPI00892652;IPI00554433;IPI00936769;IPI00642069;IPI00888282	Actin-related protein 3B	ACTR3B	7	3	17.7	47.607	418	2.2509e-55	0.329142	0.392095			0.633232
IPI00292787	Actin-related protein 5	ACTR5	3	3	6.6	68.297	607	5.3849e-57	1.63292
IPI00171779;IPI00793434;IPI00794531;IPI00790140	Actin-related protein 6	ACTR6	2	2	7.6	45.81	396	1.4561e-18	3.08147		1.25103
IPI00025646;IPI00794608	Actin-related protein 8	ACTR8	2	2	3.7	70.483	624	3.2712e-12	0.707864	0.929714					1.40083
IPI00009268;IPI00940464;IPI00792542;IPI00791053;IPI00788719	cDNA FLJ60317, highly similar to Aminoacylase-1 (EC 3.5.1.14)	ACY1	21	21	46.2	55.994	498	2.4623e-114	0.791703	1.39367	1.16105	2.12829	2.63741	6.06575	2.03331	3.56481	6.77507
IPI00221117	Acylphosphatase-1	ACYP1	2	2	21.2	11.261	99	3.031e-09							1.19202		3.05614
IPI00009010;IPI00106374	TRM112-like protein	AD-001	6	6	59.2	14.199	125	7.2796e-131	0.660066	0.928247	0.656858	0.976181	0.864678	0.702445	0.938262		0.464965
IPI00296441	Adenosine deaminase	ADA	10	10	33.1	40.764	363	9.22e-57	0.592347	0.505817	0.623441	0.160205	0.0849545	0.070917	0.351716	0.504286	0.612895
IPI00013897;IPI00794448;IPI00792351;IPI00878134	Disintegrin and metalloproteinase domain-containing protein 10	ADAM10	14	14	27.1	84.141	748	3.8341e-128	3.29707	3.37918	3.82307	4.20097	7.20046	5.00551	1.28123	1.67977	1.46746
IPI00013302;IPI00420070;IPI00420068;IPI00420069;IPI00420067;IPI00843806;IPI00742904;IPI00909666;IPI00513871	Disintegrin and metalloproteinase domain-containing protein 15	ADAM15	10	10	17.7	87.716	814	4.8299e-111	2.09205	1.2874	1.70823	4.00304	10.4712	3.45554	0.901632		0.856311
IPI00288894;IPI00029606	Disintegrin and metalloproteinase domain-containing protein 17	ADAM17	2	2	2.4	93.02	824	2.0019e-21		1.17358	1.44236	1.60852	1.61103	0.981065	0.84488	2.58732	1.36758
IPI00440932;IPI00440933	Disintegrin and metalloproteinase domain-containing protein 9	ADAM9	4	4	7.1	90.555	819	1.7098e-18	3.42924								2.15327
IPI00005908	A disintegrin and metalloproteinase with thrombospondin motifs 1	ADAMTS1	2	2	3.2	105.36	967	6.4151e-07							52.3314
IPI00394668;IPI00394665;IPI00760588	Double-stranded RNA-specific adenosine deaminase	ADAR	39	3	33.9	140.74	1269	0	1.5563	1.73647	1.29391	2.63199	4.74113	2.52646	1.13166	0.887154	0.703235
IPI00025057;IPI00025058	Double-stranded RNA-specific adenosine deaminase	ADAR	37	1	34.8	133.17	1200	0					10.0716
IPI00020368;IPI00184874;IPI00334613;IPI00477012;IPI00783018;IPI00384573	Double-stranded RNA-specific editase 1	ADARB1	3	3	6.9	80.762	741	2.5507e-07									9.11743
IPI00787836;IPI00412099;IPI00910696;IPI00872523	Uncharacterized aarF domain-containing protein kinase 1	ADCK1	3	3	7.9	60.577	530	1.7629e-07								0.199279
IPI00647707;IPI00178315	Uncharacterized aarF domain-containing protein kinase 4	ADCK4	2	2	5.9	60.069	544	2.9372e-06
IPI00328273;IPI00470803;IPI00852759	Adenylate cyclase type 2	ADCY2	2	2	2.2	123.6	1091	0.00060114
IPI00339214;IPI00011938;IPI00220444;IPI00910029	Adenylate cyclase type 5	ADCY5	3	3	2.5	138.91	1261	0.00060314						4.4082
IPI00030099	Adenylate cyclase type 9	ADCY9	1	1	1.2	150.7	1353	0.0083964							0.00411269
IPI00220158;IPI00019901;IPI00376220;IPI00253279	Alpha-adducin	ADD1	10	9	18.2	84.302	768	3.9669e-183	1.74022	2.03786	2.71407		1.03436		2.79775	3.80156	2.03062
IPI00019904;IPI00220241;IPI00654787;IPI00924848;IPI00220240	Beta-adducin	ADD2	2	1	3.4	80.853	726	0.0093556
IPI00004408;IPI00220754	Gamma-adducin	ADD3	6	6	11.9	79.154	706	1.7098e-54	1.53513	1.4943			0.935541		2.23469	3.83877	3.1348
IPI00293307;IPI00643517;IPI00514709;IPI00646360	Adipophilin	ADFP	9	9	29.7	48.075	437	2.48e-102	2.7268	13.7116
IPI00746777	Alcohol dehydrogenase class-3	ADH5	17	17	42.2	39.724	374	0	0.87804	0.698812	1.01143	0.655093	0.490004	0.819269	2.39687	3.40855	4.83232
IPI00651738;IPI00470791;IPI00893165	1,2-dihydroxy-3-keto-5-methylthiopentene dioxygenase	ADI1	12	12	74.3	21.498	179	2.0765e-137	0.632591	0.646037	0.438231	0.396762	0.479226	0.339075	0.471365	0.425786	0.26819
IPI00290279;IPI00234368	Adenosine kinase	ADK	21	21	53.6	40.545	362	2.9055e-266	1.43686	1.21764	1.49178	0.694348	0.598444	0.729927	1.83564	2.23809	2.19351
IPI00022215	Activity-dependent neuroprotector homeobox protein	ADNP	16	16	18.6	123.56	1102	4.2908e-41	1.1531		0.844595	0.988924		1.05211	0.937383	0.812546	0.404744
IPI00045939	2-aminoethanethiol dioxygenase	ADO	4	4	16.7	29.751	270	9.567e-06	1.42609								1.83503
IPI00556385;IPI00329593;IPI00940629;IPI00550060;IPI00555848;IPI00103892	ADP-dependent glucokinase	ADPGK	7	7	21.5	54.088	497	4.3345e-112	1.0478	0.853898					0.855139	1.24775	2.41051
IPI00015865	Poly(ADP-ribose) glycohydrolase ARH3	ADPRHL2	8	8	32.2	38.946	363	7.2171e-109	1.43672			1.57518	1.22514		1.46567		2.4475
IPI00012497;IPI00555929	Beta-adrenergic receptor kinase 1	ADRBK1	10	7	14.2	79.573	689	6.5033e-44	0.594919	0.708265	0.635122	0.676544	0.800576		0.78064	0.934405	0.527398
IPI00019926	Beta-adrenergic receptor kinase 2	ADRBK2	4	1	5.8	79.709	688	4.1687e-14									3.27944
IPI00033030;IPI00470921;IPI00911048	Proteasomal ubiquitin receptor ADRM1	ADRM1	8	8	20.9	42.153	407	2.9109e-40	0.672631	0.684791	0.657376	0.749794	0.659196	0.721241	0.9997	0.958497	1.01522
IPI00942092;IPI00026904;IPI00220887;IPI00909590;IPI00916724;IPI00916319	Adenylosuccinate lyase	ADSL	20	7	55.8	54.889	484	1.327e-268	1.25083	0.838293	1.20773	0.747552	0.516342	0.792205	0.64587	0.670916	0.842744
IPI00026833;IPI00641992;IPI00878313	Adenylosuccinate synthetase isozyme 2	ADSS	22	19	51.1	50.097	456	6.0145e-290	3.58051	3.5068	2.51471	3.15577	4.59179	3.17128	2.794	3.34806	1.98906
IPI00167065;IPI00170914	Adenylosuccinate synthetase isozyme 1	ADSSL1	5	2	7.4	54.562	500	1.4025e-45						0.615347
IPI00396231;IPI00747743;IPI00924523;IPI00856087;IPI00925626;IPI00925353	Uncharacterized glycosyltransferase AER61	AER61	8	8	16.9	62.01	527	6.6223e-120	1.38427	1.31354			0.356011		3.91589	5.25486	7.68521
IPI00922153;IPI00181905;IPI00902986;IPI00455138;IPI00514745	cDNA FLJ57978	AFAP1L2	12	10	18.5	97.193	872	2.9501e-50							30.1951		23.4747
IPI00382615	Actin filament-associated protein 1-like 2	AFAP1L2	3	1	15.5	38.3	349	1.0825e-07
IPI00004344;IPI00383219;IPI00658213	AF4/FMR2 family member 4	AFF4	3	3	4.4	127.46	1163	1.2216e-65	1.6223	0.657505	0.980873	1.77453	1.35015		0.946074	0.587303
IPI00001091	AFG3-like protein 2	AFG3L2	26	25	32.9	88.583	797	1.9732e-117	0.658371	0.60931	0.662515	2.81912	2.46542	3.02188	0.90629	0.981162	1.26296
IPI00022443	Alpha-fetoprotein	AFP	6	2	10.3	68.677	609	6.289e-54
IPI00554740;IPI00429547;IPI00329005;IPI00434952;IPI00554475	Aftiphilin	AFTPH	5	5	7.3	102.2	937	7.4484e-18	1.16003	0.598838		1.18467	1.13453				0.832085
IPI00026259	N(4)-(beta-N-acetylglucosaminyl)-L-asparaginase	AGA	2	2	5.8	37.194	346	2.8356e-29								0.227304
IPI00916750;IPI00456242;IPI00456244;IPI00741010;IPI00941598;IPI00873461;IPI00413998;IPI00398893;IPI00916317	Arf-GAP, GTPase, ANK repeat and PH domain-containing protein 1	AGAP1	1	1	1.8	116.62	1069	0.0088686
IPI00217393;IPI00015401	Arf-GAP, GTPase, ANK repeat and PH domain-containing protein 2	AGAP2	2	2	2.1	124.67	1192	2.4293e-14
IPI00163185;IPI00479742;IPI00903295;IPI00384607;IPI00747315	Arf-GAP, GTPase, ANK repeat and PH domain-containing protein 3	AGAP3	5	1	8.1	97.95	911	1.4665e-91
IPI00903328;IPI00607616;IPI00736669;IPI00304693;IPI00916083;IPI00915778;IPI00915906	cDNA FLJ40132 fis, clone TESTI2012155, highly similar to NUCLEOPORIN-LIKE PROTEIN RIP	AGFG1	8	8	25.2	60.766	584	6.861e-75	1.44042	1.55453	1.56255	0.865801	0.657333		1.16996		1.42383
IPI00418238;IPI00418239	Arf-GAP domain and FG repeats-containing protein 2	AGFG2	2	2	5.6	48.962	481	0.00027608							0.423837
IPI00019353;IPI00553233	Acylglycerol kinase, mitochondrial	AGK	11	11	31.8	47.137	422	6.8802e-209	0.944644	1.55181	1.1379	1.92171	4.40606	2.36451	0.955201	1.27959	0.864379
IPI00328318;IPI00514126;IPI00219066;IPI00219065	Glycogen debranching enzyme	AGL	26	26	25	174.89	1533	2.2925e-156	2.04499	1.17546	1.91088	1.10216	0.713725	1.32247	1.43049	1.86199	2.97601
IPI00305360	Agmatinase, mitochondrial	AGMAT	3	3	13.6	37.66	352	4.5204e-08		0.180946			0.166948		0.0740741
IPI00019141;IPI00902608	1-acyl-sn-glycerol-3-phosphate acyltransferase alpha	AGPAT1	2	2	10.6	31.716	283	2.3081e-24
IPI00749011;IPI00445527;IPI00217814;IPI00795305	1-acyl-sn-glycerol-3-phosphate acyltransferase gamma	AGPAT3	3	3	6.5	52.202	463	4.3071e-09	1.50094	1.15335	1.99001	2.84301	3.99632	2.84868	0.465419	0.569282
IPI00016956;IPI00940010;IPI00910390;IPI00514976;IPI00514869;IPI00917647;IPI00465005	1-acyl-sn-glycerol-3-phosphate acyltransferase delta	AGPAT4	3	3	6.9	44.021	378	0.0039038									16.9529
IPI00028491	1-acyl-sn-glycerol-3-phosphate acyltransferase epsilon	AGPAT5	4	4	11.8	42.072	364	0.0099443							2.67037		1.80099
IPI00140301	Glycerol-3-phosphate acyltransferase 3	AGPAT9	8	7	22.4	48.705	434	3.6391e-53	11.0507	11.3085	15.0614	1.21887			2.47476
IPI00010349;IPI00917312	Alkyldihydroxyacetonephosphate synthase, peroxisomal	AGPS	20	20	44.2	72.911	658	8.2184e-241	16.369	35.0398	29.6472				79.3588	17.6364	11.4245
IPI00007427;IPI00942032;IPI00893607;IPI00893733;IPI00152409;IPI00894341;IPI00893886;IPI00910250	cDNA, FLJ93394, highly similar to Homo sapiens anterior gradient 2 homolog (Xenopus laevis) (AGR2), mRNA	AGR2	18	18	64.6	22.237	195	0	0.0803729	0.193945	0.0515756	31.7601	69.4686	28.2016	0.155135	0.0735078	0.0452018
IPI00374563;IPI00514026;IPI00939142	Agrin	AGRN	19	19	13.2	214.84	2045	9.1564e-65	1.2618	1.15689	0.874967	0.779302			3.19693	2.47623	2.72695
IPI00102501;IPI00513986	Type-1 angiotensin II receptor-associated protein	AGTRAP	2	2	24.5	17.419	159	4.3141e-76	0.706814	0.814001	1.19901		2.28477	2.63421	2.81754		7.32332
IPI00216928;IPI00853267	Alanine--glyoxylate aminotransferase 2-like 2	AGXT2L2	2	2	4.7	49.71	450	0.00026298
IPI00878213;IPI00217957;IPI00170594;IPI00876984	Putative uncharacterized protein AHCTF1	AHCTF1	13	13	7.1	256.25	2304	2.1752e-38	1.24584		1.23782	1.67384		1.26896			0.979816
IPI00012007;IPI00935818	Adenosylhomocysteinase	AHCY	31	31	54.2	47.716	432	0	2.01252	1.44109	1.99318	0.806907	1.0948	1.08352	1.08976	1.17466	1.36364
IPI00872261;IPI00182938;IPI00479201;IPI00441992	Putative uncharacterized protein AHCYL1	AHCYL1	18	10	33.8	58.882	530	6.2181e-115	1.06573	0.856971	1.1159	1.35678	1.13852	1.28352	1.02359	1.35042	1.30931
IPI00101645;IPI00908473;IPI00942978;IPI00878976;IPI00910338;IPI00441948;IPI00643334	Putative adenosylhomocysteinase 3	AHCYL2	9	1	12.9	66.72	611	7.9068e-61	1.54466			2.79533			0.840195
IPI00021812;IPI00555610;IPI00031605;IPI00010196	Neuroblast differentiation-associated protein AHNAK	AHNAK	391	387	80.2	629.09	5890	0	2.46093	1.66967	2.88767	1.44911	1.32155	1.94898	4.40063	4.45613	6.62603
IPI00856045;IPI00884904;IPI00885105	Protein AHNAK2	AHNAK2	113	71	42.3	616.62	5795	0	24.8497	63.2231	24.0512		0.632871		43.4292	87.0701	21.5619
IPI00021008	Aryl hydrocarbon receptor	AHR	6	6	15.3	96.146	848	8.3151e-12	4.19974						3.39317	6.01323	3.03159
IPI00030706	Activator of 90 kDa heat shock protein ATPase homolog 1	AHSA1	25	25	72.2	38.274	338	0	0.346416	0.412712	0.40151	0.323866	0.339109	0.389302	0.311837	0.282582	0.289076
IPI00303602;IPI00480020;IPI00867514;IPI00783517	Axin interactor, dorsalization-associated protein	AIDA	3	3	12.4	35.023	306	4.8105e-19	8.4246		9.6432	4.23872	7.67342			3.57999	3.6001
IPI00034205;IPI00549277;IPI00873309;IPI00553214;IPI00922286;IPI00643837;IPI00644825;IPI00552659;IPI00853027	Allograft inflammatory factor 1-like	AIF1L	6	6	41.3	17.068	150	2.7821e-13	0.442811	0.690942	0.453823		0.445474	0.450025	0.133032	0.086798	0.0582276
IPI00000690;IPI00157908;IPI00300018;IPI00910786;IPI00910617	Apoptosis-inducing factor 1, mitochondrial	AIFM1	32	32	59.2	66.9	613	0	0.495197	0.491787	0.550995	1.09391	1.01956	1.54038	0.313519	0.362384	0.52304
IPI00013909;IPI00759583	Apoptosis-inducing factor 2	AIFM2	5	5	18.8	40.526	373	3.052e-68		0.415127	0.571037		0.130967			0.216934	0.183918
IPI00294840;IPI00045122	Absent in melanoma 1 protein	AIM1	22	22	18.1	188.67	1723	3.8503e-105	4.53865	3.88863	5.54816	2.40772		4.03584		16.1509	14.9914
IPI00942209;IPI00166211;IPI00641063	Absent in melanoma 1-like protein	AIM1L	1	1	1.4	80.364	726	0.01427
IPI00793201;IPI00006252;IPI00910647	cDNA FLJ61202, highly similar to Multisynthetase complex auxiliary component p43	AIMP1	20	20	65.8	37.039	336	1.0504e-272	0.787898	0.868282	0.759936	1.05203	1.04129	1.13612	0.858443	0.858738	1.00226
IPI00011916;IPI00940113;IPI00893242;IPI00893909	Aminoacyl tRNA synthetase complex-interacting multifunctional protein 2	AIMP2	13	3	57.8	35.348	320	0	0.80952	0.651848	0.79968	0.8036	0.891504	1.05198	0.716589	0.784683	0.868734
IPI00925804;IPI00010460;IPI00939349	Non-functional aryl hydrocarbon receptor interacting protein	AIP	16	16	52.7	40.763	368	4.8565e-243	1.00175	1.02636	0.97229	0.521485	0.432432	0.39901	0.382248	0.534188	0.448229
IPI00640817;IPI00018342;IPI00515036	Adenylate kinase 1 variant	AK1	16	15	71.9	23.411	210	3.3301e-298	1.68098	1.87241	2.46117	0.906125	0.945626	1.52532	1.02788	1.06833	1.79334
IPI00215901;IPI00218988;IPI00921960;IPI00922165;IPI00172460;IPI00218989	Adenylate kinase 2, mitochondrial	AK2	23	23	76.2	26.477	239	0	0.873973	0.686766	0.822639	2.69114	3.71761	4.1862	1.03572	1.65445	1.55135
IPI00465256;IPI00910240;IPI00478236	GTP:AMP phosphotransferase mitochondrial	AK3	14	14	59.5	25.565	227	5.132e-109	1.2285	0.40935	0.552822	1.09821	1.81505	0.542035	0.764175	1.01341	1.71037
IPI00016568;IPI00738805	Adenylate kinase isoenzyme 4, mitochondrial	AK3L1	12	12	49.3	25.268	223	4.9493e-64	1.25606	0.987947	0.941708	2.97725	2.85633	3.36044	2.66581	3.60075	3.08909
IPI00743623;IPI00844054;IPI00019992;IPI00941501;IPI00742040;IPI00641783;IPI00166342	Adenylate kinase 5	AK5	2	1	2.7	63.445	563	2.155e-07						1.87959
IPI00032879;IPI00556532	Adenylate kinase isoenzyme 6	AK6	5	5	23.8	20.061	172	1.0449e-64	0.288351	0.406802	0.31141	0.320636	0.325119	0.253325	0.305409	0.204057	0.228582
IPI00942186;IPI00022585;IPI00158627	A kinase anchor protein 1, mitochondrial	AKAP1	15	15	22	97.34	903	4.1389e-63	1.02125	1.40461	1.57394	3.32757	2.93212	3.43974	0.843099	0.806127	1.13598
IPI00306265;IPI00657731	A kinase anchor protein 10, mitochondrial	AKAP10	6	6	13	73.817	662	2.1714e-70	0.93214				1.41689		0.63589
IPI00007411	A-kinase anchor protein 11	AKAP11	3	3	3.6	210.51	1901	1.482e-12	0.650957				0.688753
IPI00237884;IPI00867627;IPI00940222;IPI00217683;IPI00431688	A-kinase anchor protein 12	AKAP12	12	12	8.7	191.48	1782	1.5338e-86			19.8981				18.5815		21.2983
IPI00065931;IPI00872432;IPI00329783;IPI00829774;IPI00829717;IPI00375281;IPI00829853;IPI00885071;IPI00384381	A-kinase anchor protein 13	AKAP13	14	14	6.7	307.84	2817	8.7551e-89	0.902283	0.625821	1.0863	0.872372	1.18732		2.49352	3.58912	2.89452
IPI00816415;IPI00032064;IPI00914995;IPI00942356;IPI00171217	A-kinase anchor protein 2	AKAP2	24	20	26.7	120.63	1090	2.4748e-141	35.4007		3.93082				22.9589	6.8573	3.11303
IPI00073769;IPI00643947;IPI00940879;IPI00384832	A kinase (PRKA) anchor protein 2	AKAP2	6	2	13.2	47.626	433	1.0932e-13			19.396
IPI00014474	A-kinase anchor protein 8	AKAP8	8	8	16.9	76.107	692	5.0297e-149	4.18918		2.64033	0.500225					0.346777
IPI00297455;IPI00939756;IPI00641614;IPI00644440;IPI00645037;IPI00646239	A-kinase anchor protein 8-like	AKAP8L	8	8	14.9	71.639	646	7.8857e-21	3.30732	2.47463	2.49969		0.82149	0.96581		0.285144	0.577434
IPI00220628;IPI00019223;IPI00220625;IPI00220627;IPI00220624;IPI00940189;IPI00793082;IPI00902900;IPI00926278;IPI00386927	A-kinase anchor protein 9	AKAP9	15	15	4.8	455.42	3929	3.6224e-58	0.660808	0.542476	0.526981	0.74107	0.393763	0.786596	0.533077	0.574746	0.647836
IPI00220271;IPI00647702	Alcohol dehydrogenase [NADP+]	AKR1A1	19	19	69.5	36.573	325	3.5783e-250	2.67953	1.56265	3.28709	7.3062	8.00384	9.53289	2.30478	3.48214	4.9157
IPI00413641;IPI00556258;IPI00926520	Aldose reductase	AKR1B1	14	13	68	35.853	316	1.2302e-112							74.3494	21.3415	47.1832
IPI00105407	Aldo-keto reductase family 1 member B10	AKR1B10	6	4	22.8	36.02	316	2.9778e-11									12.1424
IPI00005668;IPI00910990;IPI00843904;IPI00455167;IPI00887673	Aldo-keto reductase family 1 member C2	AKR1C2	14	1	54.8	36.735	323	5.7029e-278	41.249	54.9904	12.0301		1.01106		80.6062	82.0345	17.2485
IPI00291483;IPI00909541;IPI00745863	Aldo-keto reductase family 1 member C3	AKR1C3	14	7	53.9	36.844	323	8.1519e-202	28.2877	89.7505	70.1164				73.6052	77.2917	40.9786
IPI00305978;IPI00940335;IPI00169280;IPI00942126;IPI00908691;IPI00922851	Aflatoxin B1 aldehyde reductase member 2	AKR7A2	11	10	41.5	39.589	359	0	0.736703	0.777968	0.820008	0.847601	0.687569	1.03022	1.16101	1.79369	1.96475
IPI00293721	Aflatoxin B1 aldehyde reductase member 3	AKR7A3	2	1	9.1	37.206	331	0.0042714							1.04118
IPI00012866;IPI00440705;IPI00797131;IPI00798192;IPI00790293;IPI00788928	RAC-alpha serine/threonine-protein kinase	AKT1	15	9	33.5	55.686	480	6.9075e-74	1.91685	1.79292	1.62001	0.931532	1.48487	0.984349	0.851571	0.940115	0.824131
IPI00306195;IPI00549786;IPI00853601	Proline-rich AKT1 substrate 1	AKT1S1	4	4	24.6	29.262	276	2.7028e-08	2.64915	1.50809			1.76476	2.15257	1.16278	1.56235	1.56443
IPI00012870;IPI00794313;IPI00784816	RAC-beta serine/threonine-protein kinase	AKT2	6	3	14.1	55.768	481	8.2731e-17		1.49732	1.02575	0.758898		0.817929		2.13735	0.819941
IPI00031747;IPI00219411	RAC-gamma serine/threonine-protein kinase	AKT3	10	5	22.8	55.774	479	3.5989e-67
IPI00790373;IPI00937974;IPI00442121	Aminolevulinate, delta-, dehydratase	ALAD	11	11	33.6	37.229	339	4.6053e-85	0.741015	0.574878	0.603865	1.53292	3.04127	1.94799	0.30216	0.458505	0.407963
IPI00007266;IPI00941830;IPI00792453;IPI00789294;IPI00908524;IPI00847214	cDNA FLJ56039, highly similar to 5-aminolevulinate synthase, nonspecific, mitochondrial (EC 2.3.1.37)	ALAS1	3	3	5.6	72.623	657	3.1145e-06							11.2217
IPI00015102;IPI00807403;IPI00795504;IPI00791964;IPI00748835	CD166 antigen	ALCAM	19	19	35.2	65.102	583	0	5.9891	2.6521	8.72676	5.57756	3.91267	5.34474	1.00127	1.43328	1.42001
IPI00217920;IPI00646424	Aldehyde dehydrogenase family 16 member A1	ALDH16A1	13	1	22.9	85.112	802	8.6446e-185	0.818867	0.856238	0.965624	1.33205	1.68265	1.30533	0.603318	0.945984	0.878117
IPI00008982;IPI00218547	Delta-1-pyrroline-5-carboxylate synthetase	ALDH18A1	38	38	49.8	87.301	795	0	0.500801	0.459031	0.404613	1.42264	1.46927	1.56993	0.737028	0.608865	0.593401
IPI00218914;IPI00910463;IPI00644628;IPI00644077;IPI00642144	Retinal dehydrogenase 1	ALDH1A1	13	10	21	54.861	501	1.1716e-53									21.3092
IPI00216805;IPI00241238;IPI00169288	Retinal dehydrogenase 2	ALDH1A2	7	4	12.4	56.723	518	4.8301e-35									17.4456
IPI00026663;IPI00908927;IPI00384967;IPI00909256;IPI00792655;IPI00386733	Aldehyde dehydrogenase family 1 member A3	ALDH1A3	43	37	75.4	56.108	512	0	48.9644	70.7614	41.115	0.774473	5.1581	8.87233	92.43	109.503	34.4341
IPI00103467	Aldehyde dehydrogenase X, mitochondrial	ALDH1B1	21	18	47.8	57.238	517	0	2.56193	1.48078	3.18492	1.21954	0.710429	1.46297	1.02917	1.42019	2.20192
IPI00793673;IPI00290553;IPI00915423;IPI00158280;IPI00445969;IPI00792950	Formyltetrahydrofolate dehydrogenase isoform a variant	ALDH1L1	4	3	4.4	99.752	912	1.2199e-06									39.0076
IPI00298308;IPI00878818;IPI00878398;IPI00796986	Probable 10-formyltetrahydrofolate dehydrogenase ALDH1L2	ALDH1L2	4	3	5.2	101.74	923	5.7191e-25								31.1507
IPI00006663;IPI00792207;IPI00795914	Aldehyde dehydrogenase, mitochondrial	ALDH2	22	19	52	56.381	517	7.7606e-238				11.302	14.3312	17.3455			4.63994
IPI00394758;IPI00333619;IPI00789301;IPI00384883;IPI00654709;IPI00018031;IPI00296183;IPI00555728;IPI00166751;IPI00902542;IPI00940201;IPI00795549;IPI00929488;IPI00009744;IPI00796116;IPI00796823	Fatty aldehyde dehydrogenase	ALDH3A2	15	15	28.1	57.669	508	2.3182e-152	1.36407	1.14808	1.30996	0.779484	0.686201	0.539374	1.23539	1.76666	1.52353
IPI00217871;IPI00930698;IPI00647328;IPI00552848	Delta-1-pyrroline-5-carboxylate dehydrogenase, mitochondrial	ALDH4A1	23	23	40.5	61.719	563	0	0.654879	0.529661	0.758898	8.64528	14.801	9.42241	1.12371	2.08507	2.54434
IPI00336008;IPI00019888	cDNA FLJ78564, highly similar to Homo sapiens aldehyde dehydrogenase 5 family, member A1 (succinate-semialdehyde dehydrogenase) (ALDH5A1), nuclear gene encoding mitochondrial protein, transcript variant 2, mRNA	ALDH5A1	11	11	24.8	58.653	548	4.7249e-189	0.348493	0.298945	0.426312	0.789765	0.68451	1.18087	0.177516	0.1279	0.0927558
IPI00024990	Methylmalonate-semialdehyde dehydrogenase [acylating], mitochondrial	ALDH6A1	25	24	57.9	57.839	535	0	0.358423	0.253569	0.364551	2.29721	2.58251	3.51247	0.22204	0.30145	0.401881
IPI00221234;IPI00936002;IPI00909694;IPI00910420;IPI00916990;IPI00916206;IPI00917139;IPI00917841	Alpha-aminoadipic semialdehyde dehydrogenase	ALDH7A1	28	28	59.2	58.486	539	0	1.65177	0.901795	1.48399	2.50394	2.57732	3.36089	1.61311	2.92826	3.93005
IPI00171391;IPI00172476;IPI00878117;IPI00921838	Aldehyde dehydrogenase family 8 member A1	ALDH8A1	2	2	7	53.401	487	0.0016876
IPI00479877	4-trimethylaminobutyraldehyde dehydrogenase	ALDH9A1	26	26	48.8	56.291	518	4.7206e-273	1.70303	1.36904	2.30123	3.37462	4.77281	4.43636	1.40657	1.65014	2.40639
IPI00796333;IPI00465439	Fructose-bisphosphate aldolase A	ALDOA	48	39	82.5	45.26	418	0	0.752389	0.66454	0.521866	1.04873	1.63819	1.4609	1.12079	1.30117	1.02528
IPI00218407;IPI00942961;IPI00513830	Fructose-bisphosphate aldolase B	ALDOB	3	2	13.5	39.473	364	1.1371e-25									9.95124
IPI00549761;IPI00644402;IPI00936177;IPI00942441;IPI00145612	Chitobiosyldiphosphodolichol beta-mannosyltransferase	ALG1	6	5	15.5	52.518	464	4.9724e-56						1.59137	0.74228	0.693241
IPI00414597;IPI00105827;IPI00797294	Alpha-1,2-glucosyltransferase ALG10-A	ALG10	3	3	7.6	55.605	473	4.0279e-06		0.758323					0.700574
IPI00643365	Asparagine-linked glycosylation protein 11 homolog	ALG11	3	3	9.8	55.65	492	4.647e-58	1.81018	2.00128	2.6395				0.416302
IPI00012208	Dolichyl-P-Man:Man(7)GlcNAc(2)-PP-dolichyl-alpha-1,6-mannosyltransferase	ALG12	1	1	2	54.654	488	0.00029384
IPI00795917;IPI00020512	Asparagine-linked glycosylation 13 homolog (S. cerevisiae)	ALG13	3	3	3.3	126.05	1137	2.234e-14			0.240483
IPI00386072;IPI00171443	Alpha-1,3-mannosyltransferase ALG2	ALG2	11	11	26.9	47.091	416	1.1918e-117	0.529605	0.453432	0.545078	1.26715	0.791202	1.23637	0.590528	0.793462	0.987362
IPI00002506;IPI00909046;IPI00909749	Dolichyl-phosphate beta-glucosyltransferase	ALG5	6	6	23.8	36.946	324	8.9508e-66	0.791327	0.55457	0.83956		1.46331	2.11676	0.899847	0.747161	1.26983
IPI00300971;IPI00797222	Asparagine-linked glycosylation 6 homolog (S. cerevisiae, alpha-1,3-glucosyltransferase)	ALG6	2	2	4.9	58.347	509	2.0273e-33	0.881756	0.92687	0.931793	2.13876	2.14929		0.744546	0.895496
IPI00032370;IPI00550318	Probable dolichyl pyrophosphate Glc1Man9GlcNAc2 alpha-1,3-glucosyltransferase	ALG8	4	4	10.8	60.087	526	2.7974e-24							0.906783	0.787712
IPI00234857;IPI00941446;IPI00642390;IPI00910234;IPI00645383	Alpha-1,2-mannosyltransferase ALG9	ALG9	2	2	4.5	95.952	844	1.0973e-11				3.20164	3.87327
IPI00076597	Alpha-ketoglutarate-dependent dioxygenase alkB homolog 3	ALKBH3	2	2	13.6	33.374	286	0.013923							3.20924
IPI00033770	Alkylated DNA repair protein alkB homolog 4	ALKBH4	1	1	3.3	33.837	302	0.01427
IPI00759562;IPI00413659;IPI00936011	Alkylated DNA repair protein alkB homolog 5	ALKBH5	3	3	7	51.409	458	1.8872e-05		0.753012	0.840548						0.424124
IPI00154533	Alkylated DNA repair protein alkB homolog 8	ALKBH8	2	2	5.4	75.557	667	9.4415e-15							1.46778	1.08575
IPI00178743;IPI00917930;IPI00740123;IPI00740909;IPI00854639	Alstrom syndrome protein 1	ALMS1	3	3	1.2	461.19	4169	1.7875e-06			1.08663						1.11182
IPI00005781;IPI00470667;IPI00220010;IPI00220009;IPI00793237	Arachidonate 15-lipoxygenase type II	ALOX15B	11	11	23.8	75.884	676	3.187e-122							87.7578	35.8616	26.3075
IPI00419916	Alkaline phosphatase, tissue-nonspecific isozyme	ALPL	7	7	13	57.304	524	9.3177e-38			9.81836
IPI00007289;IPI00290380	Alkaline phosphatase, placental type	ALPP	1	1	3.3	59.519	550	6.4968e-05
IPI00295004;IPI00295005	Alsin	ALS2	2	2	2.9	183.66	1657	5.7911e-44
IPI00418601;IPI00879941;IPI00165965;IPI00927059;IPI00794711;IPI00924979;IPI00645050;IPI00879806;IPI00927770;IPI00329369;REV_IPI00385978;REV_IPI00658082;REV_IPI00295638;REV_IPI00221106;REV_IPI00657639;REV_IPI00477803;REV_IPI00171692;REV_IPI00171152;IPI00445149	ALS2 C-terminal-like protein	ALS2CL	6	6	8.8	107.75	953	1.2313e-14	0.971534			1.046	0.482532		19.2715		31.3637
IPI00925719;IPI00103028;IPI00477702;IPI00555653	cDNA FLJ60659, weakly similar to N-acetylglucosamine-6-phosphatedeacetylase (EC 3.5.1.25)	AMDHD2	6	6	18.2	63.594	594	3.1823e-77	0.218579	0.392742	0.228854	1.19507	2.09174	1.19802	0.363187		0.465831
IPI00423874;IPI00376686	Autocrine motility factor receptor, isoform 2	AMFR	2	2	3.3	72.995	643	0.0070368		1.65235
IPI00022258;IPI00719771;IPI00646629	AMME syndrome candidate gene 1 protein	AMMECR1	1	1	3.6	35.463	333	5.4516e-09
IPI00007722;IPI00942246;IPI00184670;IPI00215827;IPI00215826;IPI00411384;IPI00619970;IPI00300573	cDNA, FLJ95309, highly similar to Homo sapiens adenosine monophosphate deaminase 2 (isoform L)(AMPD2), mRNA	AMPD2	24	24	25.3	101.85	890	1.2943e-173	0.51369	0.449843	0.460851	1.79048	0.605547	0.622471	0.446389	0.516182	0.795482
IPI00033907;IPI00935517;IPI00787723;IPI00917588	Anaphase-promoting complex subunit 1	ANAPC1	6	6	4.8	216.5	1944	6.9498e-64	0.751993	0.856604	1.26741	0.685871	0.544425				0.783024
IPI00002549;IPI00375832;IPI00739363	Anaphase-promoting complex subunit 2	ANAPC2	2	2	3.2	93.827	822	0.00080031	0.749064		0.597372						0.405515
IPI00002551;IPI00419201	Anaphase-promoting complex subunit 4	ANAPC4	6	6	9	92.115	808	2.092e-24		0.798913				0.470212	1.12971	2.03124	0.818063
IPI00008247;IPI00788662;IPI00793939;IPI00798336;IPI00375602;IPI00793934;IPI00383638	Anaphase-promoting complex subunit 5	ANAPC5	7	6	14.2	85.076	755	3.1741e-28		0.760283	0.711642		0.693529	0.574647	1.0619	0.249097	0.496155
IPI00008248;IPI00939488;IPI00915282	Anaphase promoting complex subunit 7	ANAPC7	12	12	25.4	66.855	599	4.1332e-154	1.36973	1.8993	1.37699	0.884721		0.487591	1.36216	1.12595	0.617932
IPI00478899;IPI00375317	Protein angel homolog 2	ANGEL2	1	1	3.3	62.338	544	5.9979e-05
IPI00153060;IPI00740170	Angiopoietin-related protein 4	ANGPTL4	9	9	28.1	45.214	406	4.3782e-71							117.786	97.144	26.4117
IPI00472779;IPI00921566;IPI00939165;IPI00909984;IPI00871968;IPI00939328;IPI00871666;IPI00333558	Ankyrin-3	ANK3	10	9	3.4	480.4	4377	2.6934e-98	1.26443	1.06944	0.942685	2.2579	2.48096	2.11977		0.546926
IPI00159899;IPI00914539;IPI00375301;IPI00909909	Ankyrin repeat and FYVE domain-containing protein 1	ANKFY1	19	19	25	132.82	1211	4.0612e-273	0.980392	0.769468	1.02457	0.972384	0.636011	0.792142	1.51969	1.89308	2.04194
IPI00815707;IPI00217442;IPI00797397;IPI00798060;IPI00654628;IPI00790296;IPI00793474;IPI00797665;IPI00798374;IPI00829921;IPI00556571;IPI00871927;IPI00410680;IPI00927600	Ankyrin repeat and KH domain-containing protein 1	ANKHD1	21	12	12.3	278.74	2634	4.7983e-294	0.85034	0.778392	0.683948	1.14616	1.60588	0.870853	1.07777	1.28291	0.716076
IPI00829741;IPI00329245;IPI00793681;IPI00794201;IPI00791411	Ankyrin repeat and LEM domain-containing protein 2	ANKLE2	7	7	9.2	104.12	938	4.1557e-16	2.07594	1.70873	1.96102	0.730353	1.24908		2.63755	2.16127	1.90611
IPI00217831;IPI00795440;IPI00784159;IPI00941092;IPI00294987;IPI00793852;IPI00793772	Ankyrin repeat domain-containing protein 13A	ANKRD13A	3	3	6.9	67.618	590	2.3949e-10									11.6943
IPI00418468;IPI00553055;IPI00552205	Ankyrin repeat domain-containing protein 16	ANKRD16	1	1	5	39.283	361	8.2779e-11
IPI00784020;IPI00783186;IPI00909867;IPI00868922;IPI00251783;IPI00871529;IPI00941297	Ankyrin repeat domain-containing protein 17	ANKRD17	18	9	10.4	274.25	2603	2.5328e-209	0.799424	0.618735		0.866551	0.700133	1.33175			0.968617
IPI00102377;IPI00434705	Ankyrin repeat domain-containing protein 27	ANKRD27	7	7	11.2	116.98	1050	4.1855e-29	1.80109	1.57112	1.02501	0.754262		0.793336			0.644953
IPI00477505;IPI00514769;IPI00908701;IPI00791281	Serine/threonine-protein phosphatase 6 regulatory ankyrin repeat subunit A	ANKRD28	16	15	20.5	116.54	1086	4.5608e-179	2.40477	2.2607	2.74574	1.0037	0.85492	0.799488	0.930752	1.09162	1.08568
IPI00940020;IPI00398957;IPI00939388;IPI00798334	Ankyrin repeat domain 33	ANKRD33	6	6	8.3	115.08	1076	5.2488e-54	0.502689	1.95255	0.357475	0.827267	0.869414		2.83889	2.31401	0.384349
IPI00337574;IPI00884424	Ankyrin repeat domain-containing protein 39	ANKRD39	2	2	15.3	19.651	183	4.7739e-05			0.290841				1.16008		0.207792
IPI00061168	Ankyrin repeat domain-containing protein 40	ANKRD40	4	4	17.7	41.088	368	9.6764e-17	1.58396	1.77481	1.89	5.88963	9.8561	4.98927	1.43579
IPI00167419;IPI00761054;IPI00942283;IPI00395999;IPI00477624;IPI00916720;IPI00915264	Serine/threonine-protein phosphatase 6 regulatory ankyrin repeat subunit B	ANKRD44	4	3	5.4	107.77	994	0.00033585	1.38269			0.610836
IPI00221285	Ankyrin repeat domain-containing protein 50	ANKRD50	7	7	7.8	155.86	1429	1.035e-20	0.417206	0.279384		1.04348	0.516903		2.89461	0.444701	0.430052
IPI00253323	Ankyrin repeat domain-containing protein 57	ANKRD57	5	5	15	55.671	525	3.2444e-17	4.34443	2.45194					10.1491	9.78474	13.8758
IPI00395663;IPI00641886	Ankyrin repeat and SAM domain-containing protein 1A	ANKS1A	10	10	13.2	123.11	1134	1.2285e-26	1.17904	0.71803	0.949037		1.05703		0.88308	0.766401	0.808865
IPI00335437;IPI00916311;IPI00909687;IPI00916826;IPI00916154;IPI00916654	Ankyrin repeat and zinc finger domain-containing protein 1	ANKZF1	6	6	9.1	80.926	726	8.2952e-40	0.527537	1.19167					1.35613	1.01988	1.15407
IPI00743594;IPI00657687;IPI00032958;IPI00926956;IPI00927431;IPI00926483	cDNA FLJ57190, highly similar to Actin-binding protein anillin	ANLN	24	19	27	124.33	1125	2.0394e-196	6.06244	9.22765	6.38774	0.877116	1.00258		3.19479		0.414921
IPI00395839;IPI00873502;IPI00384668;IPI00922381	Anoctamin-1	ANO1	6	6	7.3	114.08	986	1.5033e-20		11.7213
IPI00794169;IPI00797182;IPI00925510;IPI00902435;IPI00941544;IPI00908702;IPI00925930;IPI00926435;IPI00927521;IPI00926850;IPI00926219;IPI00927370;IPI00926133;IPI00925729	Anoctamin-10	ANO10	5	5	9.5	76.457	661	2.4436e-37	0.87804	0.730994		1.80382	2.78544		0.526926	2.08372	2.77316
IPI00917081;IPI00151710;IPI00910110;IPI00941310;IPI00942795;IPI00798252	ANO6 protein	ANO6	7	7	9	108.43	931	5.5007e-27	2.32509	1.92064	3.861		1.78824	2.34571	2.78404	3.84069	3.68718
IPI00025849;IPI00940656;IPI00449263;IPI00760940;IPI00172487;IPI00916115;IPI00018262	Acidic leucine-rich nuclear phosphoprotein 32 family member A	ANP32A	19	15	52.2	28.585	249	4.0578e-271	0.717051	0.74438	0.865351	1.31285	0.920048	1.5239	0.541565	0.487852	0.710783
IPI00007423;IPI00759824;IPI00647001;IPI00930163;IPI00887411;IPI00237334;IPI00645753	Acidic leucine-rich nuclear phosphoprotein 32 family member B	ANP32B	13	8	38.2	28.787	251	6.368e-232	0.548276	0.582649	0.541506	0.325935	0.341029	0.439696	0.306861	0.337245	0.291613
IPI00165393;IPI00910423;IPI00514333;IPI00910661;IPI00514758	Acidic leucine-rich nuclear phosphoprotein 32 family member E	ANP32E	6	1	25.4	30.692	268	3.7602e-220	2.50069	1.81455	1.66262	0.690751	0.385981	0.422851	0.510204	0.517759	0.373399
IPI00640833	Acidic (Leucine-rich) nuclear phosphoprotein 32 family, member E	ANP32E	6	1	32.7	25.125	220	1.6139e-221
IPI00221224	Aminopeptidase N	ANPEP	3	3	4.8	109.54	967	2.2957e-14								10.1052
IPI00375556;IPI00894466;IPI00375552;IPI00935486;IPI00036552;IPI00375555	Anthrax toxin receptor 2	ANTXR2	2	2	5.7	53.518	488	7.9672e-12
IPI00218918;IPI00549413;IPI00908577;IPI00643231	Annexin A1	ANXA1	34	34	81.2	38.714	346	0	32.8062	66.8092	176.358	3.2476	9.33707	4.04008	197.285	225.52	193.603
IPI00909703;IPI00414320;IPI00552303;IPI00465213;IPI00017337;IPI00940580	cDNA FLJ51518, highly similar to Annexin A11	ANXA11	19	19	44.9	45.728	412	2.7024e-229	1.81693	1.343	1.78776	0.502462	0.569022	0.561735	1.4993	1.82835	1.36487
IPI00024095;IPI00745868	Annexin A3	ANXA3	27	27	74.6	36.375	323	0	31.175	25.9034	36.4445	1.94522	1.41693	1.45824	41.7589	57.323	52.356
IPI00793199;IPI00872780	Proliferation-inducing protein 28	ANXA4	25	25	74.5	36.085	321	0	1.90887	1.67574	2.02815	0.752162	0.834794	0.874355	1.6805	2.54291	2.84269
IPI00329801;IPI00872379	Annexin A5	ANXA5	28	28	70.9	35.936	320	0	0.987264	1.10573	1.0613	0.7397	0.777001	0.80141	2.18512	2.27335	2.99554
IPI00002459;IPI00221226;IPI00442825	Annexin A6	ANXA6	46	46	62.8	75.276	667	0	1.33488	0.920048	1.68475	3.9093	2.97415	3.35492	0.903832	0.988435	2.11528
IPI00002460;IPI00021771	Annexin A7	ANXA7	26	25	45.4	52.826	489	9.8508e-152	1.42727	1.18903	1.42456	1.10942	1.69748	1.40192	1.28322	1.40863	1.61298
IPI00872295;IPI00924896;IPI00940898;IPI00914849;IPI00872852;IPI00414499;IPI00908556	cDNA FLJ56319, highly similar to Annexin A8	ANXA8	21	2	52.9	43.855	393	8.2024e-245	38.7837	46.7246	22.6403				26.0349	37.5615	24.3938
IPI00930266;IPI00883636;IPI00910108;IPI00871158	cDNA, FLJ94196, highly similar to Homo sapiens annexin A8 (ANXA8), mRNA	ANXA8L2	21	2	63.6	36.907	327	9.6949e-225
IPI00008714	Annexin A9	ANXA9	6	6	28.1	38.363	345	1.7735e-21			0.0539084	0.410998	1.53132	0.280332	1.15113		0.065475																												Protocadherin gamma subfamily A, 1, isoform 2	Protocadherin gamma-A4	Protocadherin gamma-A5	Protocadherin gamma-B2	Protocadherin gamma-B6
IPI00784464;IPI00883590;IPI00646410;IPI00783535	Flavin-containing amine oxidase domain-containing protein 1	AOF1	1	1	1.5	92.225	823	8.696e-08
IPI00029715;IPI00917071;IPI00917477	Aldehyde oxidase	AOX1	3	2	2.8	147.92	1338	1.7295e-07									11.7324
IPI00328257;IPI00413947;IPI00385007;IPI00788911	AP-1 complex subunit beta-1	AP1B1	46	1	50.9	104.61	949	0	1.18861	0.835003	1.23882	1.07385	0.969368	1.20688	0.907935	0.979816	1.23475
IPI00940292;IPI00384489	cDNA FLJ58495, highly similar to Adapter-relatedprotein complex 1 beta-1 subunit	AP1B1	46	1	48.9	103.56	939	0						0.990884
IPI00643591;IPI00293396;IPI00939879;IPI00909722;IPI00909354;IPI00910023	cDNA FLJ30560 fis, clone BRAWH2004217, highly similar to AP-1 complex subunit gamma-1	AP1G1	33	32	47.7	94.139	845	0	0.626527	0.567924	0.584317	0.559566	0.450897	0.5527	0.584624	0.560255	0.662515
IPI00027178;IPI00908750	AP-1 complex subunit gamma-like 2	AP1G2	11	11	16.2	87.116	785	1.3791e-70	2.45495	1.88034	2.36956	3.95444	5.50146	4.02156	1.93043	2.66894	1.82986
IPI00444646;IPI00297931;IPI00827622;IPI00798416;IPI00854566;IPI00790575;IPI00789002	Putative uncharacterized protein AP1GBP1	AP1GBP1	3	2	2.4	156.44	1448	0.00039273
IPI00910088;IPI00032516;IPI00910344	cDNA FLJ14622 fis, clone NT2RP2000147, highly similar to Adaptor-related protein complex 1 mu-1 subunit	AP1M1	16	12	43.9	49.84	435	1.5502e-226	0.935804	0.822098	1.17849	0.943396	0.639918	1.13689	0.986875	1.13362	1.61454
IPI00002552;IPI00219794	AP-1 complex subunit mu-2	AP1M2	19	15	49.6	48.108	423	4.8233e-177	0.882924	0.557849	0.74677	1.02048	0.995818	1.25769	0.645369	0.560287	0.558036
IPI00152898;IPI00927531;IPI00100559;IPI00909244;IPI00009244;IPI00930407;IPI00922006;IPI00385342;IPI00646398;IPI00654799;IPI00939836;IPI00060866;IPI00916845;IPI00915398	AP-1 complex subunit sigma-1A	AP1S1	8	8	41.8	18.733	158	9.7264e-98	0.53496	0.549843	0.524082	0.87535	0.899685	0.84488	0.671051	0.589379	0.607312
IPI00942271;IPI00304577;IPI00256684;IPI00909810	cDNA FLJ36998 fis, clone BRACE2007295, highly similar to ALPHA-ADAPTIN A	AP2A1	34	27	43.7	107.54	977	0	2.03186	1.74077	2.05099	1.1905	1.39394	1.18479	1.30268	1.62088	1.5233
IPI00016621;IPI00914938;IPI00943035;IPI00914952;IPI00166396;IPI00902707;IPI00556111	AP-2 complex subunit alpha-2	AP2A2	29	22	41.3	104.09	940	0	3.5317	2.91452	4.34688	6.71682	6.72766	7.05119	5.25238	8.68056	8.1813
IPI00784366;IPI00784156;IPI00790702;IPI00909735	AP-2 complex subunit beta-1	AP2B1	44	21	51.5	105.69	951	0	2.11202	1.77911	2.42319	1.4785	1.03102	1.57043	1.74734	2.16305	2.23324
IPI00022256;IPI00619900;IPI00909772;IPI00937793;IPI00798379;IPI00925072;IPI00790642;IPI00924869;IPI00925403;IPI00925212;IPI00925682;IPI00925750	AP-2 complex subunit mu-1	AP2M1	19	19	46.9	49.654	435	4.3522e-120	1.78875	1.82262	1.72906	1.595	1.54799	1.2729	1.50512	2.23404	1.64742
IPI00219840;IPI00183781	AP-2 complex subunit sigma-1	AP2S1	5	5	32.4	17.018	142	1.9379e-08			2.07366		1.55492	1.34214			2.00844
IPI00021129;IPI00910526	AP-3 complex subunit beta-1	AP3B1	33	11	29.8	121.32	1094	1.2889e-163	1.1268	0.860882	1.08748	1.75021	1.88111	1.91256	1.33517	1.67715	1.7974
IPI00397887	AP-3 complex subunit beta-1	AP3B1	20	1	32.2	63.77	565	1.5388e-67						2.04394
IPI00005793	AP-3 complex subunit beta-2	AP3B2	9	1	7.1	119.06	1082	1.0015e-31
IPI00719680;IPI00411453;IPI00411677;IPI00289608;IPI00413686	AP-3 complex subunit delta-1	AP3D1	37	37	38.8	136.65	1215	0	1.11488	0.789141	1.03673	2.03604	2.04386	2.36883	1.4103	1.65497	1.68717
IPI00032459;IPI00909671	AP-3 complex subunit mu-1	AP3M1	12	9	41.6	46.939	418	1.1501e-202	1.21815	1.0352	1.44473	1.81613	2.21656	2.05145	1.42187	1.45079	1.91424
IPI00022883;IPI00795029	AP-3 complex subunit mu-2	AP3M2	7	2	26.3	46.977	418	1.6424e-85				13.3858	1.1809		0.958681	1.92991	2.4312
IPI00014624	AP-3 complex subunit sigma-1	AP3S1	3	3	11.6	32.144	293	4.4627e-93		1.08148		3.54497	3.96306	4.26567	2.22916	3.29576	3.53632
IPI00002150;IPI00514624;IPI00922864;IPI00515080;IPI00640132;IPI00643929	AP-4 complex subunit beta-1	AP4B1	7	7	11.1	83.259	739	9.1386e-21		0.294265	0.285519				0.416649	0.40848	0.529157
IPI00010213	AP-4 complex subunit epsilon-1	AP4E1	5	5	8.4	127.29	1137	5.8022e-41		0.251826					0.549089
IPI00103040;IPI00423366;IPI00924561;IPI00909400;IPI00926043;IPI00927908;IPI00926434;IPI00927663;IPI00926844;IPI00926596	AP-4 complex subunit mu-1	AP4M1	3	1	8.8	49.976	453	5.6549e-09		0.339812
IPI00001145;IPI00020385;IPI00384143	AP-4 complex subunit sigma-1	AP4S1	2	2	13.2	17.005	144	0.0012701		0.384231	0.494413			0.565547
IPI00023630;IPI00217460;IPI00217462;IPI00217461;IPI00217463;IPI00375875	Apoptotic protease-activating factor 1	APAF1	7	7	6.7	141.84	1248	6.0695e-40		4.43479	2.39046	0.750469		0.871156	0.9994		3.45543
IPI00383108;IPI00010843;IPI00783577;IPI00941556;IPI00941010;IPI00922281	Adaptor protein FE65a2	APBB1	2	1	3.5	77.421	712	2.6847e-06
IPI00012391;IPI00215877	Adenomatous polyposis coli protein	APC	4	4	2	311.64	2843	1.4215e-12				2.38356	3.27129	4.66614
IPI00216332;IPI00939369	cDNA FLJ56398, highly similar to Protein APCDD1	APCDD1	1	1	1.9	64.177	565	0.00032915
IPI00926648;IPI00337741;IPI00794973;IPI00925016;IPI00924544;IPI00926864;IPI00927573;IPI00924765;IPI00926401	Acylamino-acid-releasing enzyme	APEH	22	17	42.7	81.673	737	0	0.674445	0.613121	0.889996	1.99716	2.40749	2.23539	1.08206	1.53492	1.77192
IPI00215911;IPI00792538	DNA-(apurinic or apyrimidinic site) lyase	APEX1	22	22	63.8	35.554	318	0	1.24036	0.912159	1.22387	1.24313	0.845809	1.50627	0.529213	0.647082	0.781311
IPI00916626;IPI00383396;IPI00555659;IPI00439694;IPI00916599;IPI00916010;IPI00917625	cDNA FLJ77748	APG9L1	8	8	10.3	94.446	839	3.1619e-23	0.849185	0.855505	1.03523		0.779545	1.28828		0.658588
IPI00554742;IPI00855856;IPI00555572;IPI00908668;IPI00555743;IPI00910664	Apoptosis inhibitor 5	API5	14	14	35.5	56.769	504	7.0198e-247	0.822571	0.739208	0.844523	0.907112	1.03111	1.30678	0.904323		0.806712
IPI00911064;IPI00549730;IPI00449162	cDNA FLJ58961, highly similar to APAF1-interacting protein	APIP	11	11	47.9	29.255	259	2.8888e-128	2.52691	2.01219	2.08017	0.554785	0.442341		0.468033	0.50958	0.644912
IPI00031030;IPI00220978;IPI00220977;IPI00884988;IPI00334946;IPI00943091	Amyloid-like protein 2	APLP2	10	9	16.1	86.955	763	1.8313e-23	2.86862	1.55519	1.75824		0.613046	1.29577	2.63706	5.66251	1.88317
IPI00020017;IPI00644556;IPI00909045	Adipose most abundant gene transcript 2 protein	APM2	8	8	92.1	7.8547	76	1.0442e-112		2.07422	3.11983	16.4989	189.265	13.5729	7.97385	1.66157	3.65644
IPI00031131;IPI00791304;IPI00929530	Adipocyte plasma membrane-associated protein	APMAP	21	20	57.9	46.48	416	6.0168e-212	0.490076	0.508208	0.524191	1.2184	1.0828	1.32048	0.559441	0.690036	0.960523
IPI00168479;IPI00941988;IPI00848298;IPI00514157;IPI00448169	cDNA FLJ56357, highly similar to Homo sapiens apolipoprotein A-I binding protein (APOA1BP), mRNA	APOA1BP	11	11	42	33.627	307	1.3054e-169	0.904486	0.763068	1.03304	1.90404	1.84464	2.26989	0.426494	0.496574	0.904404
IPI00022229;IPI00894122;REV_IPI00217605	Apolipoprotein B-100	APOB	12	4	2.9	515.56	4563	1.0684e-34			1.15855	2.6713
IPI00880117;IPI00005531;IPI00743629;IPI00409617;IPI00874275;IPI00013876;IPI00879789	Apolipoprotein B mRNA editing enzyme, catalytic polypeptide-like 3B	APOBEC3B	16	10	38.2	57.208	490	8.1832e-168	23.7988	21.9394	36.6972						9.85028
IPI00872929;IPI00555878	Apolipoprotein B mRNA editing enzyme, catalytic polypeptide-like 3C variant	APOBEC3C	5	3	31.3	23.756	198	5.6972e-66							136.008	52.4686	33.6746
IPI00477614	DNA dC->dU-editing enzyme APOBEC-3F	APOBEC3F	5	2	14.2	45.02	373	3.563e-19	4.27168	4.42184	9.65344				8.99038	10.652	8.86211
IPI00396656;IPI00419289;IPI00401132;IPI00409765	DNA dC->dU-editing enzyme APOBEC-3G	APOBEC3G	3	2	10.7	46.407	384	2.1793e-11	1.61028	1.50107	1.65706	0.597193	0.606538	0.730887	1.82199	2.37857	2.34973
IPI00657670;IPI00021857	Apolipoprotein C-III variant 1	APOC3	1	1	13.7	12.815	117	3.6132e-42
IPI00924574;IPI00006662;IPI00927914;IPI00910432	Apolipoprotein D	APOD	5	5	18.6	24.158	215	4.2678e-13						25.2175
IPI00021842	Apolipoprotein E	APOE	4	1	12	36.154	317	9.6585e-11									14.9178
IPI00220007;IPI00877964	cDNA FLJ55764, highly similar to Apolipoprotein-L2	APOL2	4	4	8.6	49.765	451	7.1858e-14							0.910498		1.48604
IPI00042580;IPI00843886;IPI00797546	Apolipoprotein O	APOO	3	3	22.2	22.284	198	1.0385e-22					2.50985		0.800769
IPI00394809;IPI00942279;IPI00942210	Apolipoprotein O-like	APOOL	8	8	47.4	29.159	268	9.7904e-195	1.66442	3.28278	2.00706	3.02737	4.71832	2.53717	2.60139	2.96007	1.67238
IPI00006608;IPI00412681;IPI00412924;IPI00219187;IPI00914602;IPI00219186;IPI00219185;IPI00412568;IPI00219183;IPI00394658;IPI00909502;IPI00219182	Amyloid beta A4 protein	APP	18	17	30.4	86.942	770	3.6871e-170	3.32745	3.56214	2.14606		2.57778	1.2025	7.09019	6.86153	3.78931
IPI00007393;IPI00788682	Amyloid protein-binding protein 2	APPBP2	5	5	14.4	66.853	585	5.266e-39	0.169886	0.288077	0.163519		0.94304		0.22647	0.281262	0.42673
IPI00015836;IPI00794130;IPI00794687	DCC-interacting protein 13-alpha	APPL1	16	15	27.4	79.663	709	1.4918e-97	2.39751	1.53827	2.76671		1.7915		2.37124	4.30923	4.00609
IPI00218693;IPI00642457;IPI00816267	Adenine phosphoribosyltransferase	APRT	18	18	94.4	19.608	180	0	0.938791	0.83605	0.994135	0.655824	0.849329	1.16821	0.529998	0.67769	0.851354
IPI00297572;IPI00796835;REV_IPI00872309	Intron-binding protein aquarius	AQR	18	17	14.5	171.38	1486	4.5116e-67	1.24941	0.968898	1.04069	0.95584		0.973994	0.552517	0.486192	0.387252
IPI00872240;IPI00020578;IPI00642252	A-Raf proto-oncogene serine/threonine-protein kinase	ARAF	9	6	21.1	67.585	606	7.8783e-54	0.469087	0.577601		0.895736	0.861772		0.440742	0.510699	0.552792
IPI00828080;IPI00639996;IPI00479190;IPI00646915;IPI00220421;IPI00925583;IPI00640351;IPI00941533;IPI00441964;IPI00100939	Arf-GAP, Rho-GAP domain, ANK repeat and PH domain-containing protein 1	ARAP1	12	11	12.7	162.19	1450	1.0017e-154	0.44617	0.542064		0.450025	0.399409		0.793021	1.17741	1.16
IPI00298520;IPI00514053;IPI00915422;IPI00439944	Archain 1, isoform CRA_a	ARCN1	33	33	50.7	61.626	552	0	0.777484	0.747496	0.683153	1.26887	1.65522	1.46765	1.34698	1.36971	1.38393
IPI00013184;IPI00440719;IPI00793465;IPI00791664;IPI00644194;IPI00853145;IPI00641919;IPI00455623	N-terminal acetyltransferase complex ARD1 subunit homolog A	ARD1A	16	16	78.3	26.458	235	5.0055e-193	0.705368	0.651975	0.674627	0.796749	0.716076	0.838715	0.857045	0.828706	0.872068
IPI00012023	Amphiregulin	AREG	4	4	17.1	27.895	252	4.9992e-10			0.0710379			0.0357526	5.86958	7.94155	1.54462
IPI00215914;IPI00215917;IPI00930263;IPI00930413;IPI00910783;IPI00797941;IPI00789027;IPI00386998;IPI00793598;IPI00789649;IPI00785094;IPI00386997;IPI00386996;IPI00935525;IPI00888658	ADP-ribosylation factor 1	ARF1	16	9	74	20.697	181	0	1.19268	0.645911	1.05352	1.66672	2.48256	1.92652	0.964599	0.868961	1.15165
IPI00215918;IPI00792330	ADP-ribosylation factor 4	ARF4	14	8	68.9	20.511	180	0	1.70097	1.04636	1.39272	1.29557	1.71265	1.43256	1.96692	1.61642	2.17566
IPI00215919;IPI00909515;IPI00853337	ADP-ribosylation factor 5	ARF5	13	6	68.9	20.529	180	5.1464e-276	0.801603	0.50945	0.832154		0.671411	0.550843	0.93006		0.865052
IPI00215920	ADP-ribosylation factor 6	ARF6	8	7	59.4	20.082	175	3.3654e-75	1.08998	0.756086	0.979336	0.796559	0.913826	0.759994	0.896057	1.03343	1.28535
IPI00217354;IPI00175169;IPI00449160;IPI00922590	ADP-ribosylation factor GTPase-activating protein 1	ARFGAP1	13	13	38.4	45.675	414	1.4686e-183	1.40716	0.941797	1.10646	2.13111	2.61568	2.56345	1.21623	1.11809	1.58697
IPI00297322;IPI00871680;IPI00903129;IPI00941529;IPI00922903	ADP-ribosylation factor GTPase-activating protein 2	ARFGAP2	19	5	42.4	56.72	521	0	0.430867	0.556793	0.478629	1.10558	1.04311	1.01677	0.748167	0.702346	0.754205
IPI00299263;IPI00915304;IPI00922812;IPI00877805;IPI00879282	ADP-ribosylation factor GTPase-activating protein 3	ARFGAP3	15	1	35.7	56.928	516	4.7977e-62	4.39136	3.55644	4.49337	0.851716	1.04696	1.04539	2.5507	2.8243	4.19252
IPI00879742	ADP-ribosylation factor GTPase activating protein 3	ARFGAP3	14	1	35.1	48.969	444	1.4276e-58
IPI00002188	Brefeldin A-inhibited guanine nucleotide-exchange protein 1	ARFGEF1	29	17	19.5	208.76	1849	0	2.85943	1.99005	3.03628	6.89275	5.25486	6.31991	2.35605	3.19458	3.91681
IPI00002186	Brefeldin A-inhibited guanine nucleotide-exchange protein 2	ARFGEF2	24	12	18.7	202.04	1785	7.6524e-260	1.50204	0.984252	1.88455	3.54434	3.20821	4.12899	1.19417	1.30485	1.6919
IPI00514897;IPI00903237	Brefeldin A-inhibited guanine nucleotide-exchange protein 3	ARFGEF3	18	18	12.4	240.65	2177	6.3718e-225	0.476304	0.217817	0.243956	1.43082	1.69073	1.92175	0.126185	0.183211	0.541389
IPI00021258;IPI00216520;IPI00744919;IPI00910325	Arfaptin-1	ARFIP1	17	17	53.9	41.738	373	2.0713e-208	0.65716	0.605987	0.690274	1.89326	1.5287	1.71165	0.818063	0.87512	0.955475
IPI00021257;IPI00909529;IPI00910034;IPI00908576	Arfaptin-2	ARFIP2	11	11	48.7	37.855	341	4.1499e-144	0.345519	0.460766	0.383656	1.19298	1.57371	1.83763	0.537461	0.535447	0.638081
IPI00015178;IPI00914030;IPI00028549	ADP-ribosylation factor-related protein 1	ARFRP1	2	2	11.4	22.614	201	3.7579e-39	0.420451					6.30358		0.869338	1.20301
IPI00398768;IPI00291560;IPI00038356	Arginase-1	ARG1	2	2	8.8	35.664	330	8.6784e-66					12.0249
IPI00844406;IPI00478834;IPI00908538	Arginine and glutamate-rich protein 1	ARGLU1	6	6	16.1	32.885	273	3.1718e-05			1.31738			1.50562	2.46591		1.01323
IPI00020567;IPI00941730;IPI00382580	Rho GTPase-activating protein 1	ARHGAP1	29	29	68.8	50.435	439	0	0.416597	0.472567	0.492393	1.12179	1.09667	1.43962	0.810767	0.968523	1.31062
IPI00217418;IPI00328279;IPI00410501;IPI00872643;IPI00643949	Rho GTPase-activating protein 12	ARHGAP12	9	9	16.3	93.113	816	1.1908e-35	1.35507	1.12204	0.593437	0.462193	0.49586		0.893575	1.70451	0.598516
IPI00064767;IPI00829657;IPI00830043;IPI00940971;IPI00386947;IPI00829687;IPI00168527;IPI00910081;IPI00830020	Rho GTPase-activating protein 17	ARHGAP17	10	10	13.6	95.436	881	1.2528e-36	0.353107	0.744546	0.520102	1.44513	0.901551	1.04296	0.87184	0.631872	1.04302
IPI00296353;IPI00760924	Rho GTPase-activating protein 18	ARHGAP18	8	8	13.9	74.946	663	4.2397e-147	2.28744	1.31358					8.43811	10.2145	7.42446
IPI00169307;IPI00941749;IPI00867539;IPI00867727;IPI00646651	Rho GTPase-activating protein 21	ARHGAP21	5	5	3.2	217.46	1958	4.3467e-09			9.67399					7.00084	5.59128
IPI00885078;IPI00942334;IPI00398170;IPI00885118;IPI00942605	Rho GTPase-activating protein 27	ARHGAP27	4	4	6.2	98.386	889	1.1302e-05
IPI00152011;IPI00646444	Rho GTPase-activating protein 29	ARHGAP29	14	14	15.1	142.06	1261	6.3875e-146	11.4953	23.5377	14.9428				55.3741	16.4946
IPI00830067;IPI00619938;IPI00376321	Rho GTPase-activating protein 30	ARHGAP30	2	1	1.8	118.59	1101	0.0047343
IPI00646885;IPI00013988	Rho GTPase-activating protein 5	ARHGAP5	14	14	11.9	172.46	1502	3.1727e-70	1.51745	0.848896					1.93697	2.77747	1.74423
IPI00216060;IPI00744264;IPI00216058;IPI00216062;IPI00868745;IPI00783215;IPI00868805;IPI00472223;IPI00893984;IPI00856035;IPI00893749;IPI00903206;IPI00889590	Rho GTPase activating protein 8	ARHGAP8	5	5	9.5	72.811	643	2.0158e-11		1.1315					0.707564	0.616751	0.903587
IPI00003815;IPI00794402;IPI00796541;IPI00872531;IPI00793767;IPI00797560;IPI00797924;IPI00791180	Rho GDP-dissociation inhibitor 1	ARHGDIA	15	15	78.4	23.207	204	1.7591e-275	1.3579	1.17665	1.57302	1.19289	1.02301	1.22567	1.42684	1.65824	2.09767
IPI00003817;IPI00792758;IPI00792537;IPI00791712;IPI00794454	Rho GDP-dissociation inhibitor 2	ARHGDIB	9	9	59.7	22.988	201	7.3936e-67			10.4314		56.2461	54.3301	82.0749	18.2956	101.771
IPI00395605;IPI00647786;IPI00339379;IPI00433169;IPI00643028;IPI00166711	Rho guanine nucleotide exchange factor 1	ARHGEF1	31	31	39.6	104.06	927	6.2944e-276	1.25811	1.17906	1.40869	0.946611	0.815594	1.0125	2.07087	2.17217	2.71415
IPI00413517;IPI00873672;IPI00419950;IPI00414886;IPI00789317;IPI00419949;IPI00791676	Rho guanine nucleotide exchange factor 10	ARHGEF10	10	9	9.8	151.61	1369	1.4306e-39	2.30463		0.971157		0.399233		2.99106	2.61773	2.37102
IPI00513819;IPI00478817;IPI00896497;IPI00642727;IPI00910632;IPI00168137	Rho guanine nucleotide exchange factor 10-like protein	ARHGEF10L	3	1	2.3	140.36	1279	2.5884e-05	0.78796	1.11838	1.22305	1.92263	3.96087		1.22528		1.09479
IPI00896467	Rho guanine nucleotide exchange factor 10-like protein	ARHGEF10L	3	1	2.5	117.62	1067	8.1166e-05
IPI00022164;IPI00339353	Rho guanine nucleotide exchange factor 12	ARHGEF12	11	11	8.2	173.23	1544	1.651e-12	1.16782		1.03537	1.65224	2.68284	2.13197	1.43773	1.16728	1.78244
IPI00550506;IPI00328544;IPI00889532;IPI00893783	Rho guanine nucleotide exchange factor 16	ARHGEF16	15	15	30.5	80.104	709	3.3136e-112	0.582208	0.468384	0.588928	0.535275	0.469153	0.725163	0.35727	0.347657
IPI00179437;IPI00480141;IPI00913890;IPI00895907;IPI00640298	Rho guanine nucleotide exchange factor 18	ARHGEF18	3	3	4.3	130.81	1173	7.4721e-09	2.48299
IPI00472160;IPI00643259;IPI00291316;IPI00940816;IPI00941678;IPI00908313	Rho guanine nucleotide exchange factor 2	ARHGEF2	34	34	35.1	121.08	1080	1.3631e-268	4.46548	3.5025	4.75805	1.9668	1.58499	1.31449	1.39061	1.63329	2.06864
IPI00746890;IPI00457243;IPI00418545;IPI00902602;IPI00419046	Rho guanine nucleotide exchange factor (GEF) 5	ARHGEF5	10	10	8.8	176.64	1597	6.2241e-22	1.01768	0.639018	0.892698		0.950932	0.218384	1.47953	1.59875	2.74356
IPI00900260;IPI00449906;IPI00641543;IPI00449909;IPI00449908;IPI00449907;IPI00900378;IPI00014256;IPI00640748;IPI00922898;IPI00790992	Rho guanine nucleotide exchange factor 7	ARHGEF7	12	12	21.5	82.57	731	4.4419e-75	2.05863	1.95722	2.22881		2.34742	2.231	2.26835	2.6381	2.47372
IPI00643722;IPI00929427;IPI00642705;IPI00472891	AT-rich interactive domain-containing protein 1A	ARID1A	5	5	2.5	242.04	2285	5.8172e-08		0.581193	0.861104				0.744713		0.660851
IPI00470537;IPI00647133;IPI00884387;IPI00878012;IPI00444237;IPI00880033;REV_IPI00004084;REV_IPI00221087;IPI00877986;IPI00877909	AT-rich interactive domain-containing protein 2	ARID2	6	6	4.4	197.39	1835	0.00023358			0.451528			0.795418			0.266255
IPI00294943;IPI00641694	Protein ariadne-1 homolog	ARIH1	10	10	19.9	64.117	557	7.218e-46	0.654407	0.618965	0.738062	1.00885	0.856678	0.896781	1.05915	1.0189	1.37842
IPI00007304;IPI00792023;IPI00902655	Protein ariadne-2 homolog	ARIH2	3	3	7.3	57.818	493	0.001233	1.26704		1.73825						1.74283
IPI00219518;IPI00908516;IPI00791961;IPI00376097	ADP-ribosylation factor-like protein 1	ARL1	6	6	47.5	20.417	181	5.8918e-90	1.22758	0.607533	0.935279	1.80037	1.97426	2.05116	1.25425	1.3451	1.44837
IPI00005163	ADP-ribosylation factor-like protein 15	ARL15	1	1	5.9	22.876	204	0.0004344
IPI00003326;IPI00908403;IPI00847722	ADP-ribosylation factor-like protein 2	ARL2	7	7	39.1	20.878	184	8.4637e-74	1.07411	1.20912	1.29034	0.963948	0.623403	0.930839	0.473934	0.580484	0.778756
IPI00015866;IPI00845377;IPI00910120	ADP-ribosylation factor-like protein 2-binding protein	ARL2BP	3	3	29.4	18.822	163	7.9165e-118	0.803988	0.990688					2.08524	1.78412	2.50081
IPI00003327	ADP-ribosylation factor-like protein 3	ARL3	8	8	50	20.455	182	3.4582e-99	0.53801	0.545286	0.475737	0.906947	0.793021	0.829394	0.864379	1.16795	1.45248
IPI00014232;IPI00922598	ADP-ribosylation factor-like protein 6-interacting protein 1	ARL6IP1	4	4	14.8	23.362	203	7.4611e-09	1.11938	1.30998	1.16943	0.863036	1.1898	0.6222	0.903996	0.867002	0.592382
IPI00007426;IPI00908696;IPI00909717	PRA1 family protein 3	ARL6IP5	8	8	32.4	21.614	188	8.705e-63	1.04725	0.652827	0.920641	1.12775	4.23173	3.00021	1.509	1.9396	2.32553
IPI00060031	ADP-ribosylation factor-like protein 8A	ARL8A	12	4	46.8	21.416	186	2.6976e-130	1.85199		1.714	1.28536	1.17036	2.16675	0.784683		3.54988
IPI00018871;IPI00940959;IPI00789069;IPI00793455	cDNA FLJ56285, highly similar to ADP-ribosylation factor-like protein 8B	ARL8B	15	8	47.1	27.252	238	1.5574e-195	3.17763	0.909753	2.70871	0.967305	0.894055	1.20744	0.945537	1.29759	2.18446
IPI00018260;IPI00909723	Armadillo repeat-containing protein 1	ARMC1	5	5	31.6	31.28	282	5.5314e-47		1.11579	1.09494		2.09314	1.82106	0.978953		1.15145
IPI00166394;IPI00420025;IPI00217968;IPI00855858;IPI00926087;IPI00887754;IPI00888349;IPI00930356;IPI00787987;IPI00555667;IPI00925913;IPI00926510	Armadillo repeat-containing protein 10	ARMC10	10	10	42.9	37.54	343	2.4914e-136	0.353644	0.412116	0.384778	0.793966		0.568602	0.395695	0.563761
IPI00020196;IPI00871811;IPI00470847	Armadillo repeat-containing protein 6	ARMC6	13	13	34.5	54.141	501	3.6216e-177	0.671231	0.695943	0.614251	0.732601	0.393097	0.632751	0.542564	0.905469	0.480769
IPI00795553;IPI00922208;IPI00790407;IPI00794568;IPI00396379;IPI00798137;IPI00796545;IPI00792379;IPI00794612;IPI00332835;IPI00876987;IPI00792965;IPI00795022	Armadillo repeat-containing protein 8	ARMC8	10	10	20.1	75.509	673	6.1605e-45	0.926097	0.575672	0.781616	0.644579	0.463499		1.15374	0.589379	0.569671
IPI00829927;IPI00216484;IPI00879293;IPI00916087;IPI00916195;IPI00915821;IPI00916515	LisH domain-containing protein ARMC9	ARMC9	4	4	9.4	91.761	817	2.9496e-17	0.536596						0.990099
IPI00009908	Armadillo repeat-containing X-linked protein 1	ARMCX1	2	2	4	49.18	453	0.00065076
IPI00009906	Armadillo repeat-containing X-linked protein 3	ARMCX3	6	6	20.6	42.5	379	5.1775e-26	2.42207	2.93049	3.09645	1.93555	1.74338		2.52073	3.04915	2.91231
IPI00328748;IPI00924819;IPI00927651	cDNA FLJ77177, highly similar to Homo sapiens arginine-rich, mutated in early stage tumors (ARMET), mRNA	ARMET	17	17	41.5	26.903	234	3.7659e-166	1.48681	1.02678	1.3254	1.49495	2.04165	2.09074	2.1826	2.41255	3.20379
IPI00514749;IPI00844350;IPI00922490;IPI00218287;IPI00910290;IPI00939696;IPI00412610	Aryl hydrocarbon receptor nuclear translocator	ARNT	4	4	10	86.636	789	2.0736e-53	0.978665				1.10816
IPI00217732;IPI00910251;IPI00217736;IPI00412162;IPI00879656;IPI00217735;IPI00413132;IPI00783543;IPI00217734	Aryl hydrocarbon receptor nuclear translocator-like protein 1	ARNTL	1	1	1.8	68.761	626	0.0048723
IPI00333068;IPI00926706;IPI00909730;IPI00927330	Actin-related protein 2/3 complex subunit 1A	ARPC1A	22	21	63.2	41.569	370	0	10.8256	9.15499	10.8678	6.75584	7.02149	6.21968	3.70124	4.50775	4.22083
IPI00005160;IPI00737530;IPI00927418;IPI00925033;IPI00924615;IPI00927612;IPI00927861;IPI00927206;IPI00925248;IPI00925800;IPI00924861	Actin-related protein 2/3 complex subunit 1B	ARPC1B	20	19	54.8	40.949	372	0	0.0762428	0.118833	0.0634357	0.298552	0.243671	0.170552	2.12184	2.71253	2.31262
IPI00005161;IPI00000477;IPI00925920;IPI00926315;IPI00927156;IPI00925705	Actin-related protein 2/3 complex subunit 2	ARPC2	25	25	82.3	34.333	300	1.4439e-277	1.56362	1.58866	1.79824	1.01212	0.842176	1.08776	2.3753	2.91528	2.562
IPI00871870;IPI00005162;IPI00911088;IPI00796102;IPI00794982;IPI00797967	Putative uncharacterized protein ARPC3	ARPC3	10	10	62.9	20.528	178	1.3311e-91	1.83982	1.89761	2.12373	1.21464	0.734484	1.21532	2.64257	3.62424	3.45352
IPI00925052;IPI00925334;IPI00554811;IPI00926054;IPI00790262;IPI00926232;IPI00386354;IPI00607772;IPI00924833;IPI00925522	Actin-related protein 2/3 complex subunit 4	ARPC4	11	11	55.1	21.588	187	1.7236e-112	1.70016	1.37559	1.87586	1.16071	0.898957	1.05119	1.97324	2.50282	2.55866
IPI00550234;IPI00007280;IPI00640779;IPI00903330;IPI00450866	Actin-related protein 2/3 complex subunit 5	ARPC5	9	8	67.5	16.32	151	4.3542e-191	2.0305	2.50928	1.9027	1.03216	0.835213	0.887233	3.3083	4.424	3.99345
IPI00414554	Actin-related protein 2/3 complex subunit 5-like protein	ARPC5L	8	7	58.2	16.941	153	2.9198e-85	0.873515	0.819807		1.13627	1.02593	1.14134	0.982704	0.81493	1.23864
IPI00792984;IPI00328526;IPI00745466;IPI00787416	cAMP-regulated phosphoprotein 19	ARPP19	5	4	49.6	14.484	131	6.4255e-44	0.248645	1.09676		0.865651	1.09366	0.477122	0.837872	0.606428
IPI00336017;IPI00293857;IPI00943289;IPI00021353;IPI00917616;IPI00795723	Beta-arrestin-1	ARRB1	14	13	40	46.308	410	5.9221e-94	0.799744	0.565675	0.730087	1.39758	3.10328	2.63158	0.206774	0.163894
IPI00908307;IPI00786904;IPI00180375;IPI00783893;IPI00395607;IPI00793794	cDNA FLJ56622, highly similar to Beta-arrestin-2	ARRB2	3	2	8.8	47.966	430	1.7984e-09								0.404809
IPI00166858;IPI00902674;IPI00514937;IPI00514720	Arrestin domain-containing protein 1	ARRDC1	2	1	5.5	45.981	433	1.3799e-06	0.585549					0.775916
IPI00329685;IPI00744184;IPI00853468;IPI00909705	Arylsulfatase A	ARSA	4	4	12.6	53.806	509	1.7753e-89								5.45137	10.3536
IPI00306576;IPI00413690	Arylsulfatase B	ARSB	1	1	1.9	59.687	533	0.0032763
IPI00010490;IPI00879055;IPI00220492;IPI00879180	Armadillo repeat protein deleted in velo-cardio-facial syndrome	ARVCF	2	2	3.2	104.64	962	0.005267			1.68226
IPI00418446;IPI00013698;IPI00059685	Acid ceramidase	ASAH1	16	4	40.1	46.503	411	2.3632e-108	1.11043	0.758035	1.21913	3.44353	4.61638	3.94649	1.22495	2.03223	2.70051
IPI00940046	N-acylsphingosine amidohydrolase 1	ASAH1	14	2	46.6	34.594	305	4.7672e-105						3.76251		1.8685	1.03676
IPI00376976;IPI00940307;IPI00873747	Arf-GAP with SH3 domain, ANK repeat and PH domain-containing protein 1	ASAP1	3	2	2.6	125.87	1132	8.045e-05
IPI00409613;IPI00022058	Arf-GAP with SH3 domain, ANK repeat and PH domain-containing protein 2	ASAP2	13	12	19.8	106.98	961	7.0219e-76	0.934754	0.771426	1.50675	0.487615	2.2312		3.03674	4.73082	6.22161
IPI00016560;IPI00910485;IPI00031307	Ankyrin repeat and SOCS box protein 6	ASB6	4	4	15.4	47.135	421	1.0427e-06	1.95091		1.0978
IPI00434389	Activating signal cointegrator 1 complex subunit 1	ASCC1	7	1	17.6	45.867	403	3.9071e-22	1.02365	0.926269	1.17816	1.70558	2.29637		1.75559	2.01369	2.65372
IPI00434390	Activating signal cointegrator 1 complex subunit 1	ASCC1	7	1	19	43.581	379	6.5888e-34	0.640574		1.02908	1.27267	1.23801	1.72393	1.766	2.31358	2.33869
IPI00549736;IPI00889573;IPI00894241;IPI00452803;IPI00892691;IPI00893854	Activating signal cointegrator 1 complex subunit 2	ASCC2	7	7	8.5	86.359	757	1.1773e-44	0.637105	0.627392	0.7249	1.69776	1.72372	1.65585	1.43287	1.82879	1.79992
IPI00430472;IPI00005028	Activating signal cointegrator 1 complex subunit 3	ASCC3	35	35	21.4	251.46	2202	2.0552e-236	0.83626	0.723014	0.789578	2.04315	2.45104	2.41493	1.80378	1.92864	1.72058
IPI00292168	Histone chaperone ASF1A	ASF1A	2	1	9.3	22.968	204	6.8557e-12	0.729448				0.397172			0.563603
IPI00041127	Histone chaperone ASF1B	ASF1B	3	2	21.3	22.433	202	3.5197e-43		1.12946	0.477395	0.745935		0.195948	0.772141		0.235949
IPI00328658;IPI00333837;IPI00328659	Set1/Ash2 histone methyltransferase complex subunit ASH2	ASH2L	7	7	14	68.722	628	5.6748e-69	0.87858	0.822098	0.92302	0.844309			0.652061	0.559754	0.469351
IPI00220267;IPI00607562;IPI00607563;IPI00926659;IPI00910321	Argininosuccinate lyase	ASL	14	11	30.8	51.657	464	3.8493e-224	0.711794	0.679717	1.05278	1.29936	1.83368	1.49254	1.50836	1.99756	2.41768
IPI00479385;IPI00249080;IPI00909010;IPI00888266	N-acetylserotonin O-methyltransferase-like protein	ASMTL	16	16	31.4	68.856	621	3.1896e-165	0.290175	0.283809	0.241202	0.22764	0.184254	0.176249	0.144753	0.114632	0.235677
IPI00013466;IPI00910220	Arsenical pump-driving ATPase	ASNA1	13	13	44.8	38.792	348	5.9081e-260	0.463564	0.611733	0.577901	0.893655	0.75884	0.92687	0.383612	0.418148	0.53723
IPI00554777;IPI00925572;IPI00924906;IPI00926480;IPI00925298;IPI00926959;IPI00926760;IPI00925986	Asparagine synthetase [glutamine-hydrolyzing]	ASNS	33	33	69	64.369	561	0	0.304757	0.386235	0.346741	0.322341	0.23116	0.260457	0.331049	0.420911	0.185898
IPI00294834;IPI00941148;IPI00032449;IPI00032453;IPI00746217;IPI00909538;IPI00921959;IPI00396582;IPI00910043;IPI00024254;IPI00024572;IPI00032450;IPI00433478;IPI00796966	Aspartyl/asparaginyl beta-hydroxylase	ASPH	23	23	34.3	85.862	758	3.0251e-185	2.46409	2.21166	2.70959	3.78444	5.51055	5.05485	1.32048	2.32277	1.94681
IPI00743813;IPI00480042;IPI00645386;IPI00745956	Abnormal spindle-like microcephaly-associated protein	ASPM	2	2	1	409.8	3477	1.2555e-19
IPI00065276;IPI00332071;IPI00787285;IPI00385430;IPI00794238	Tether containing UBX domain for GLUT4	ASPSCR1	9	9	16.5	69.989	647	4.8188e-21	0.683293	0.840124	0.785299	0.705268	1.14252	0.805412		0.279213	0.262867
IPI00555734;IPI00867663	L-asparaginase	ASRGL1	6	6	30.8	32.054	308	4.7889e-189	0.582242	0.449256	0.851354	0.229954		0.193637	0.0719735	0.099226	0.0598838
IPI00020632;IPI00640430;IPI00642128;IPI00909521;IPI00514341;IPI00941527	Argininosuccinate synthase	ASS1	27	27	52.7	50.817	450	0	1.78094	0.890789	1.80106	0.278769	0.23175	0.575242	0.214537	0.32203	0.165199
IPI00171445;IPI00910210;IPI00929553	ATPase family AAA domain-containing protein 1	ATAD1	5	5	16.1	40.744	361	6.1918e-13	1.15025	1.57443	1.72494	8.53825	9.02853	4.17885	2.6576
IPI00170548;IPI00470801;IPI00893906	ATPase family AAA domain-containing protein 2	ATAD2	17	15	16.5	158.55	1390	7.6783e-87			0.604814	0.701508		0.302682			0.0877193
IPI00739581;IPI00456004;IPI00925175	ATPase family AAA domain-containing protein 2B	ATAD2B	7	5	5.7	164.94	1458	5.2179e-15			0.198787			1.50286			0.546269
IPI00295992;IPI00643435;IPI00646144;IPI00045921;IPI00178879;IPI00455487;IPI00844009;IPI00513768;IPI00872864;IPI00746226;IPI00514286;IPI00443780;IPI00515125;IPI00644611	ATPase family AAA domain-containing protein 3A	ATAD3A	29	14	48.3	66.217	586	1.1097e-224	1.40327	3.98248	1.68245	1.70039	4.86429	1.47208	3.38834	3.09914	1.64096
IPI00306048;IPI00744833;IPI00384123	ATPase family AAA domain-containing protein 3B	ATAD3B	16	1	22.5	72.572	648	3.4773e-38									19.0045
IPI00030399;IPI00937963;IPI00382576;IPI00943060;IPI00179463;IPI00478063;IPI00873010;IPI00937973;IPI00916658	cDNA FLJ43468 fis, clone OCBBF2037068, highly similar to Caytaxin	ATCAY	1	1	2.8	48.844	435	1.3268e-05		3.30011					2.44421
IPI00002501;IPI00793405;IPI00027713;IPI00748922;IPI00218334;IPI00413378;IPI00375605;IPI00014322;IPI00877147;IPI00433048;IPI00847200;IPI00332389;IPI00377146;IPI00876879;IPI00337364;IPI00848332	Cyclic AMP-dependent transcription factor ATF-1	ATF1	4	4	18.5	29.232	271	3.491e-40	1.89624	1.28164		0.56802			0.767578	1.26232	0.909256
IPI00795654;IPI00796928;IPI00794198	Activating transcription factor 7-interacting protein 1	ATF7IP	2	2	3	136.42	1270	2.6927e-52							1.09575
IPI00005881	Autophagy-related protein 12	ATG12	1	1	5.3	20.632	187	1.1689e-09								0.611322
IPI00790974;IPI00470446;IPI00555905;IPI00432751;IPI00797150;IPI00446614;IPI00419717;IPI00917324;IPI00789327;IPI00871602;IPI00178692	Autophagy-related protein 16-1	ATG16L1	7	7	11.4	70.01	624	9.0439e-12		0.428872	0.8296	0.967867		1.74204	0.952109	0.805867	1.43283
IPI00878288;IPI00304926;IPI00807456;IPI00878509;IPI00658084	Autophagy-related protein 2 homolog A	ATG2A	6	5	4.9	213.14	1940	5.1911e-49			0.91954			1.10757		0.311371
IPI00152990;IPI00872410;IPI00902634	Autophagy-related protein 2 homolog B	ATG2B	7	6	4.7	252.7	2246	1.597e-15	0.539549	0.457477	0.60868	0.914829	1.1952			0.676636	0.698032
IPI00022254;IPI00449201;IPI00792840;IPI00790600	Autophagy-related protein 3	ATG3	8	8	35.4	35.864	314	1.5539e-147	0.757232	0.657246	0.781128	0.389347	0.25748	0.298249	0.490196	0.514748	0.680828
IPI00787501;IPI00746254;IPI00554649;IPI00647200;IPI00937313;IPI00942896;IPI00941681;IPI00894144;IPI00894238;IPI00743619;IPI00894423;IPI00893720;IPI00892755;IPI00892636;IPI00470477;IPI00292327;IPI00064708;IPI00184556;IPI00902988	cDNA FLJ56391, highly similar to Cysteine protease ATG4B (EC 3.4.22.-)	ATG4B	10	10	29	57.32	510	2.9e-259	0.822639	0.919202		0.384615	0.198578		0.768462	0.696767	0.663306
IPI00006800;IPI00844068;IPI00220640	Autophagy protein 5	ATG5	4	4	12.4	32.447	275	6.3178e-10	0.650999		0.656426	0.945448	0.717463	1.25272	0.771962	0.720357	1.32682
IPI00007404;IPI00925029;IPI00479911;IPI00909500;IPI00924928;IPI00926067;IPI00793782;IPI00926888;IPI00925593;IPI00925219;IPI00796939;IPI00926490;IPI00926766;IPI00925374;IPI00926965;IPI00924785;IPI00924557	Autophagy-related protein 7	ATG7	19	19	37.8	77.959	703	1.1849e-212	0.882223	0.909339	1.059	0.688895	0.780884	0.651084	0.886525	0.9994	1.26687
IPI00289499;IPI00925601;IPI00926426;IPI00926103;IPI00925871;IPI00927536;IPI00925253	Bifunctional purine biosynthesis protein PURH	ATIC	43	43	84	64.615	592	0	0.467749	0.472144	0.468735	0.720617	0.769586	0.868357	0.596801	0.679025	0.774533
IPI00103530;IPI00373946;IPI00479177	Atlastin-1	ATL1	5	4	9	63.543	558	9.4102e-24
IPI00169267;IPI00893779;IPI00845387;IPI00007183;IPI00894553;IPI00917944;IPI00917688	Atlastin-2	ATL2	9	8	16.6	66.228	583	2.5272e-151	1.27282	1.14976	1.40905	2.10668	2.37434	2.02167	1.25497	1.32463	1.23178
IPI00550523;IPI00845461	Atlastin-3	ATL3	29	29	60.3	60.541	541	0	1.0674	0.951203	1.41969	0.700378	0.507125	0.568537	1.014	0.997009	1.3847
IPI00298306;IPI00736184;IPI00289986	Serine-protein kinase ATM	ATM	2	2	0.7	350.68	3056	0.0064392
IPI00005502;IPI00654704;IPI00477923;IPI00884097;IPI00797416	Atrophin 1	ATN1	1	1	2.3	125.54	1191	2.5446e-37							1.14082
IPI00010863	Copper transport protein ATOX1	ATOX1	7	7	76.5	7.4016	68	9.7988e-172	1.19795	1.2868	1.74171	1.86494	3.54799	2.8931	0.886761	0.543951	0.87108
IPI00456983;IPI00255653;IPI00848250	Probable phospholipid-transporting ATPase IH	ATP11A	2	2	2.2	135.85	1191	0.0011608
IPI00396234;IPI00552319;IPI00555989;IPI00237446	Probable phospholipid-transporting ATPase IG	ATP11C	2	2	2.4	129.48	1132	1.4033e-07
IPI00008161;IPI00872242	Potassium-transporting ATPase alpha chain 2	ATP12A	7	2	5.1	116.05	1045	1.3019e-66
IPI00034277;IPI00218353;IPI00926308;IPI00218354;IPI00383052;IPI00916512	Probable cation-transporting ATPase 13A1	ATP13A1	23	23	27	132.95	1204	3.2004e-243	1.01796	0.894775	1.38696	1.69153	1.5755	1.31451	0.98824	1.00707	1.40319
IPI00847139;IPI00925055	Probable cation-transporting ATPase 13A3	ATP13A3	1	1	1.1	138.04	1226	0.00071338
IPI00646182;IPI00006482;IPI00414005;IPI00788782;IPI00302840;IPI00744194;IPI00644722;IPI00930085	cDNA FLJ55427, highly similar to Sodium/potassium-transporting ATPase alpha-1 chain (EC 3.6.3.9)	ATP1A1	53	37	44	113	1023	0	1.35608	1.0328	1.41046	1.24387	1.27212	1.11789	0.558254	1.06162	0.762486
IPI00375339	Sodium/potassium-transporting ATPase subunit alpha-4	ATP1A4	11	1	9.9	114.17	1029	2.382e-223			1.20937
IPI00747849;IPI00871221	Sodium/potassium-transporting ATPase subunit beta-1	ATP1B1	12	12	44.2	35.061	303	3.9071e-185	3.56075	2.43867	3.81316	3.95946	4.83957	4.30163	0.580686	1.37502	0.982994
IPI00008167;IPI00787965;IPI00793333;IPI00788784;IPI00789521;IPI00787149;IPI00790573	Sodium/potassium-transporting ATPase subunit beta-3	ATP1B3	15	15	49.1	31.512	279	6.0339e-209	0.619924	0.534102	0.865876	0.340136	0.195695	0.188267	0.601395	1.08873	0.718133
IPI00024804;IPI00396118;IPI00872163;IPI00646947;IPI00937311	Sarcoplasmic/endoplasmic reticulum calcium ATPase 1	ATP2A1	18	1	17.9	110.25	1001	0
IPI00219078;IPI00747443;IPI00177817;IPI00914019	Sarcoplasmic/endoplasmic reticulum calcium ATPase 2	ATP2A2	44	27	42.1	114.76	1042	0	1.13582	1.047	1.27987	1.68464	1.89919	1.58796	1.66445	1.78339	2.18775
IPI00218442;IPI00303760;IPI00004092;IPI00218440;IPI00748794;IPI00478023;IPI00871568	Sarcoplasmic/endoplasmic reticulum calcium ATPase 3	ATP2A3	20	11	22.3	114.87	1052	0	0.242671	0.333545	0.180089	4.31555	10.5921	3.16476	0.896941	0.330753	0.0728173
IPI00021695;IPI00216528;IPI00216527;IPI00216530;IPI00216526;IPI00216529;IPI00827630;IPI00795833	Plasma membrane calcium-transporting ATPase 1	ATP2B1	28	17	28.5	138.75	1258	0	2.26234	1.64099	0.903342	0.551146	0.687805	1.11294	1.77775	3.61847	2.13283
IPI00009791;IPI00219296;IPI00219297;IPI00219293;IPI00219294;IPI00219295	Plasma membrane calcium-transporting ATPase 2	ATP2B2	9	1	8.8	136.87	1243	4.4593e-172
IPI00012490;IPI00217171;IPI00217169;IPI00217170;IPI00217164;IPI00217165;IPI00217166;IPI00217168	Plasma membrane calcium-transporting ATPase 4	ATP2B4	23	13	21.4	137.92	1241	0	6.33392	10.4566	21.6567				14.9492	25.4259	16.7372
IPI00745171;IPI00797988;IPI00419957;IPI00943088;IPI00607568;IPI00921961;IPI00607812;IPI00413116;IPI00220473;IPI00795581	Calcium-transporting ATPase type 2C member 1	ATP2C1	10	10	17.4	105.06	959	1.4033e-232	2.78396	2.13812	2.84657	0.984737	1.14861		1.9233	2.45954	2.72094
IPI00440493;IPI00908963;IPI00549805;IPI00641249;REV_IPI00418142;REV_IPI00554504;REV_IPI00926941;REV_IPI00927295;REV_IPI00922580;REV_IPI00926503;REV_IPI00926375;REV_IPI00927951;REV_IPI00927666;REV_IPI00925092;REV_IPI00927907	ATP synthase subunit alpha, mitochondrial	ATP5A1	40	23	63.7	59.75	553	0	0.963298	0.861549	0.983768	2.67444	2.17424	2.47433	0.844595	1.0301	1.17869
IPI00303476;IPI00791498;IPI00790847;IPI00792534;IPI00793271	ATP synthase subunit beta, mitochondrial	ATP5B	30	26	76.6	56.559	529	0	0.96768	0.962094	1.00422	2.56029	2.29326	2.39498	0.886682	1.06407	1.26026
IPI00478410;IPI00395769	ATP synthase subunit gamma, mitochondrial	ATP5C1	12	12	35.2	32.996	298	3.2471e-91	0.902283	0.849834	0.914997	2.59875	2.16882	2.29022	0.827198	1.02432	1.0197
IPI00024920	ATP synthase subunit delta, mitochondrial	ATP5D	3	3	37.5	17.49	168	3.0637e-41	0.821423	0.674082	0.76864		2.30155	1.94005	0.833264	1.03641	0.906618
IPI00029133;IPI00456747;IPI00880198	ATP synthase subunit b, mitochondrial	ATP5F1	20	20	56.2	28.908	256	1.2271e-226	0.934667	0.597051	1.00081	2.82725	2.10917	2.42618	0.73692	0.926956	1.22647
IPI00220487;IPI00456049;IPI00792135;IPI00888359;IPI00887091;IPI00879809	ATP synthase subunit d, mitochondrial	ATP5H	15	15	81.4	18.491	161	2.1224e-217	0.958957	0.988435	1.03746	2.85984	2.0619	2.51661	0.915499	1.11416	1.2587
IPI00218848	ATP synthase subunit e, mitochondrial	ATP5I	3	3	50	8.3076	72	4.5718e-43	0.962186	0.868885	0.997108	3.3712	2.46111	2.57162	0.909835	1.08985	1.83746
IPI00456008;IPI00002521;IPI00794158	ATP synthase-coupling factor 6, mitochondrial	ATP5J	9	9	53.4	13.388	116	5.2238e-106	0.351395	1.69308	1.08732	2.39275	65.9935	2.3884	0.871156	0.273995	1.25962
IPI00220300;IPI00456013;IPI00219291	ATP synthase subunit f, mitochondrial	ATP5J2	4	2	42.6	10.918	94	1.091e-67			0.742887	1.88729		2.15969			1.01328
IPI00027448	ATP synthase subunit g, mitochondrial	ATP5L	6	6	57.3	11.428	103	2.1304e-74	1.03495	0.894134	0.980584	3.34012	1.93263	2.37001	0.78796	0.842886	1.24911
IPI00007611;IPI00878218;IPI00853134;IPI00893479	ATP synthase subunit O, mitochondrial	ATP5O	17	9	74.6	23.277	213	0	0.961446	0.841963	1.03732	2.81239	2.3108	2.49806	0.883548	1.09446	1.27925
IPI00017816	ATP synthase subunit s, mitochondrial	ATP5S	1	1	5.1	24.882	215	2.1196e-14	1.23857		1.30235	0.688184		3.43112	0.786287
IPI00784119;IPI00852864;IPI00552748;IPI00879995;IPI00879556;IPI00879893	V-type proton ATPase subunit S1	ATP6AP1	11	11	25.5	52.025	470	1.6736e-88	0.463822	0.698178	0.398438	1.87984	2.2969	1.46287	0.727855	0.497191	0.795229
IPI00168884;IPI00921999;IPI00642918;IPI00872971;IPI00642797;IPI00922895	Renin receptor	ATP6AP2	7	7	22.3	39.008	350	7.0433e-54	0.473171	0.676636	0.417171	2.16689	1.7712	0.984834	0.754034	0.889759	0.688848
IPI00892784;IPI00796045;IPI00743576;IPI00791716	cDNA FLJ54433, highly similar to Vacuolar proton translocating ATPase 116 kDa subunit a isoform 1	ATP6V0A1	11	11	19.5	96.599	838	1.6549e-236	0.365097	0.432844	0.454752	1.23332	0.794344	1.21968	0.435388	0.340866	1.52854
IPI00000425;IPI00152221;IPI00795987	V-type proton ATPase 116 kDa subunit a isoform 2	ATP6V0A2	10	9	12.9	98.081	856	1.3507e-38	0.31736	0.330961	0.353519	1.30859	0.804894	1.40899	0.186282	0.224977	0.343418
IPI00009852;IPI00382415	V-type proton ATPase 116 kDa subunit a isoform 4	ATP6V0A4	3	3	4.5	96.357	840	3.0247e-13						17.9598
IPI00018855	V-type proton ATPase 16 kDa proteolipid subunit	ATP6V0C	1	1	11.6	15.736	155	3.4341e-16	0.364153	0.259956		1.36366	0.997705	1.54729	0.400224	0.426003	1.18838
IPI00034159;IPI00922223	V-type proton ATPase subunit d 1	ATP6V0D1	15	15	39.3	40.329	351	1.9248e-207	0.403942	0.424034	0.445772	1.82866	1.08661	1.57495	0.550358	0.352299	0.923105
IPI00007682	V-type proton ATPase catalytic subunit A	ATP6V1A	23	23	43.8	68.303	617	0	1.47471	1.3699	1.29767	1.42033	1.10794	1.37321	1.20557	0.99552	2.10517
IPI00304911;IPI00926751;IPI00925534;IPI00925827	V-type proton ATPase subunit B, kidney isoform	ATP6V1B1	8	1	25	56.832	513	4.2028e-206
IPI00007812;IPI00848320;IPI00792597	V-type proton ATPase subunit B, brain isoform	ATP6V1B2	22	16	54.4	56.5	511	0	1.29311	1.35803	1.44732	1.12486	0.982511	1.60508	1.22809	1.02017	3.23813
IPI00007814;IPI00873237;IPI00789054	V-type proton ATPase subunit C 1	ATP6V1C1	17	17	45.8	43.941	382	2.8137e-68	2.64943	2.10633	2.52162	1.51057	1.00733	1.36112	0.94402	0.971062	1.42929
IPI00001568;IPI00385952	V-type proton ATPase subunit D	ATP6V1D	3	3	17.4	28.262	247	7.0327e-56	0.746324	1.17356		1.01317	1.12624		1.11407	0.709622	1.26947
IPI00003856;IPI00719806;IPI00719366;IPI00853433	V-type proton ATPase subunit E 1	ATP6V1E1	9	6	39.4	26.145	226	1.1717e-52	1.83375		1.74804	0.872144	1.2375	1.84502	1.35958	0.913993	2.39189
IPI00059139	V-type proton ATPase subunit E 2	ATP6V1E2	4	1	18.1	26.074	226	9.6011e-07
IPI00004488;IPI00942404	V-type proton ATPase subunit F	ATP6V1F	6	6	49.6	13.37	119	4.103e-28	0.659457	0.82631	0.573099		2.15105	1.37338	1.00576	0.822978	1.19019
IPI00025285;IPI00032147;IPI00552247	V-type proton ATPase subunit G 1	ATP6V1G1	5	5	42.4	13.757	118	1.4645e-91	1.42941	1.5569	1.45429	1.6152	1.37665	1.61749	1.24466	0.965531	1.96889
IPI00296191;IPI00414079;IPI00909198;IPI00795873	V-type proton ATPase subunit H	ATP6V1H	14	14	36.6	55.882	483	3.246e-236	1.05628	0.946253	1.13047	1.46643	1.43501	1.44059	1.52912	1.36737	2.79041
IPI00215615;IPI00215614;IPI00028610;IPI00215617;IPI00888367;IPI00741430;IPI00215616	Copper-transporting ATPase 1	ATP7A	3	3	2.7	172.08	1581	0.00010534
IPI00032402;IPI00874133;IPI00941654;IPI00221038	Probable phospholipid-transporting ATPase IA	ATP8A1	2	2	2.3	131.37	1164	0.00010781					4.32713
IPI00012851	Probable phospholipid-transporting ATPase IC	ATP8B1	4	4	3.4	143.69	1251	0.0015						3.94151
IPI00024368;IPI00220239;IPI00902910	Probable phospholipid-transporting ATPase IIA	ATP9A	8	7	8.2	118.58	1047	4.6578e-33	0.485343	0.468384			1.66259		0.129042
IPI00396022;IPI00479667	Probable phospholipid-transporting ATPase IIB	ATP9B	2	1	1.7	129.3	1147	0.0090041
IPI00302673;IPI00783728	ATP synthase mitochondrial F1 complex assembly factor 1	ATPAF1	4	4	12.8	36.436	328	1.2609e-10	1.02692			0.935366	0.889917			0.496376
IPI00296999;IPI00790950;IPI00922273	ATP synthase mitochondrial F1 complex assembly factor 2	ATPAF2	6	6	31.5	32.772	289	2.9973e-19	0.376591	0.388697		0.55919	0.339789		0.393066		0.484215
IPI00062882;IPI00643550	Cytoplasmic tRNA 2-thiolation protein 1	ATPBD3	2	2	10.1	36.45	348	2.2835e-10			0.579777				0.381971		0.493097
IPI00553153;IPI00377040;IPI00258804	ATPase inhibitor, mitochondrial	ATPIF1	2	2	20.6	12.405	107	6.3788e-15			0.443498					1.48821
IPI00412298;IPI00926461;IPI00554573;IPI00887811;IPI00887889	Serine/threonine-protein kinase ATR	ATR	6	6	2.8	301.36	2644	4.5087e-12	0.653509	0.880902	0.983381	0.707864	1.96812			0.888652	0.363319
IPI00027235;IPI00162735;IPI00218460;IPI00940485;IPI00939169	Attractin	ATRN	9	9	8.2	158.54	1429	1.6011e-20			3.13048		0.912659			4.96229	3.46608
IPI00001636;IPI00940340;IPI00940152;IPI00385153;IPI00913912;IPI00889628;IPI00889588	Ataxin-10	ATXN10	19	19	50.7	53.488	475	6.1823e-296	2.58826	2.46342	2.47133	0.919371	1.03719	0.841468	1.40677	1.87045	1.13279
IPI00180154;IPI00455363;IPI00455359;IPI00719520;IPI00792334;IPI00795276;IPI00794182;IPI00788625	Ataxin-2	ATXN2	12	12	12.7	140.28	1313	1.4341e-79	1.82186	1.3041	2.07202	1.04171	0.808538	1.18122	1.14554		1.79901
IPI00456359;IPI00456363;IPI00642402;IPI00639962;IPI00456361;IPI00883782;IPI00456365;IPI00456367;IPI00456369;IPI00479363	Ataxin-2-like protein	ATXN2L	27	27	29.1	113.37	1075	6.4878e-211	1.02069	0.946432	1.07383	0.772141	0.496993	0.686436	0.634357	0.633874	0.757863
IPI00005495;IPI00942815;IPI00219863;IPI00607670;IPI00872048;IPI00895831;IPI00219864;IPI00895820	Ataxin-3	ATXN3	4	4	9.8	43.417	376	2.8567e-30		0.95648	1.21115		0.81103		0.654879	0.789141	1.1252
IPI00001891;IPI00215815;IPI00910371;IPI00917463	Ancient ubiquitous protein 1	AUP1	10	10	24.6	53.028	476	4.5999e-60	1.80245	1.75266	1.56996	1.39831	3.04377	2.10944	0.883236		0.736811
IPI00298940;IPI00909342;IPI00646759;IPI00646206;IPI00790518	Serine/threonine-protein kinase 6	AURKA	7	7	22.8	45.809	403	8.9526e-28	0.677277	1.47102	0.625391	1.01864		0.207168	0.752615		0.130078
IPI00796914;IPI00176642	cDNA, FLJ95791, highly similar to Homo sapiens aurora kinase B (AURKB), mRNA	AURKB	5	5	21.4	39.466	345	5.4475e-27	2.33596		2.03186			0.207104			0.198704
IPI00006904	Cell death regulator Aven	AVEN	1	1	2.8	38.506	362	0.012569
IPI00735459	Autogenous vein graft remodeling associated protein 5	AVGR5	2	1	4.3	54.014	465	3.8574e-05
IPI00397348;IPI00903163;IPI00022042;IPI00916804	Late secretory pathway protein AVL9 homolog	AVL9	4	4	7.4	71.947	648	1.7324e-10		0.253975		3.03573	0.775134			0.60507
IPI00296992;IPI00397361	Tyrosine-protein kinase receptor UFO	AXL	7	7	10.4	98.335	894	1.0269e-31		2.13899	17.7538
IPI00166729;IPI00924948;IPI00939278;IPI00871622;IPI00816309;IPI00924815	Zinc-alpha-2-glycoprotein	AZGP1	12	12	45	34.258	298	4.4538e-65	23.8214	100.142	24.5688		19.0284	12.9493
IPI00298883;IPI00651721;IPI00896446;IPI00549517	5-azacytidine-induced protein 1	AZI1	6	6	6.8	122.06	1083	1.2262e-06	0.755972		1.30004			1.06309			0.354296
IPI00796379;IPI00004656;IPI00930068;IPI00941461	cDNA FLJ57067, highly similar to Beta-2-microglobulin	B2M	3	3	34.4	13.946	122	4.3969e-23		1.82508	2.05297			0.59755	2.94542	2.00582
IPI00375600	Beta-1,3-glucosyltransferase	B3GALTL	6	6	18.1	56.563	498	3.0033e-22	1.20578	1.5826	2.02347		0.562082		0.970874	1.02013	1.71996
IPI00477470;IPI00304331	B3GAT3 protein	B3GAT3	7	5	26.4	37.828	341	2.221e-45	0.176954	1.15934	0.249931	0.640328	0.569833	0.747943	0.375432	0.310183	0.557414
IPI00257239;IPI00217345;IPI00745207	UDP-GlcNAc:betaGal beta-1,3-N-acetylglucosaminyltransferase 2	B3GNT2	1	1	3.8	46.021	397	0.0026593
IPI00025473;IPI00909442	Beta-1,4 N-acetylgalactosaminyltransferase 1	B4GALNT1	1	1	2.6	58.882	533	7.9709e-16
IPI00169373;IPI00718973;IPI00929454	Beta-1,4 N-acetylgalactosaminyltransferase 2	B4GALNT2	7	7	15.4	63.301	566	1.9093e-67					33.2038	34.082
IPI00215767;IPI00759755	Beta-1,4-galactosyltransferase 1	B4GALT1	5	5	14.6	43.92	398	1.3855e-57	1.24722	1.05371	0.637836	2.08947	3.85505	1.37431	1.87554	1.56737
IPI00030128	Beta-1,4-galactosyltransferase 4	B4GALT4	2	2	7	40.041	344	2.7125e-31				0.307324																																	Amyloid beta (A4) protein (Peptidase nexin-II, Alzheimer disease), isoform CRA_d	cDNA, FLJ92638, Homo sapiens amyloid beta (A4) protein (proteasenexin-II, Alzheimer disease) (APP), mRNA	cDNA FLJ50531, highly similar to Amyloid beta A4 protein (APP) (ABPP)(Alzheimer disease amyloid protein homolog)	cDNA FLJ50491, highly similar to Amyloid beta A4 protein (APP) (ABPP)(Alzheimer disease amyloid protein) (Cerebral vascularamyloid peptide) (CVAP) (Protease nexin-II) (PN-II)(APPI) (PreA4)	cDNA FLJ59550, highly similar to Homo sapiens amyloid beta (A4) protein, transcript variant 3, mRNA
IPI00002792	Beta-1,4-galactosyltransferase 7	B4GALT7	5	5	15.9	37.405	327	1.4073e-17		0.839278	1.26634	1.2101	1.25838		0.737572
IPI00300531;IPI00641336;IPI00218546;IPI00807666;IPI00641892	BAG family molecular chaperone regulator 1	BAG1	5	5	20.9	38.877	345	1.2903e-78			0.388939	1.57532		1.557			0.16314
IPI00000643;IPI00657974	BAG family molecular chaperone regulator 2	BAG2	5	5	29.9	23.772	211	4.7661e-39	1.20194	1.59416
IPI00641582	BAG family molecular chaperone regulator 3	BAG3	23	11	59.7	61.594	575	1.3955e-157	0.497636	0.471698	0.452571	0.351976	0.47081	0.323719	1.45245	1.10654	1.06469
IPI00556027;IPI00007731	cDNA FLJ77290, highly similar to Homo sapiens BCL2-associated athanogene 5 (BAG5), mRNA	BAG5	15	15	34.8	56.026	488	1.2811e-131	0.803729	0.709069	0.79233	0.996711	1.13429	0.835631	0.653125	0.685401	0.668047
IPI00180292;IPI00299088;IPI00644120;IPI00642333;IPI00185159;IPI00647603;IPI00910507;IPI00902640;IPI00909413	Brain-specific angiogenesis inhibitor 1-associated protein 2	BAIAP2	21	21	51.3	57.444	520	4.5315e-170	2.13648	2.30899	1.81307	1.32988	1.52952	1.14907	2.24739	2.68781	1.41739
IPI00179326	Brain-specific angiogenesis inhibitor 1-associated protein 2-like protein 1	BAIAP2L1	18	18	43.1	56.882	511	5.3114e-162	0.611509	0.588305	0.53952	0.509398	0.704722	0.644828	1.0251	0.912159	0.919879
IPI00026087;IPI00186338;IPI00414985;IPI00642671	Barrier-to-autointegration factor	BANF1	11	11	71.9	10.058	89	6.7374e-168	0.673174	1.04523	0.657895	0.510647	1.27018	0.496352	0.461787	0.335255	0.370796
IPI00465087	Ubiquitin carboxyl-terminal hydrolase BAP1	BAP1	3	3	4.8	80.361	729	5.6788e-08		1.41983	1.52316	0.930319					0.547825
IPI00299024;IPI00908521	Brain acid soluble protein 1	BASP1	15	15	82.8	22.693	227	0	0.934579	0.755687	2.40108		1.41239	0.0873591	0.583805	0.19439	1.40329
IPI00641829;IPI00848161;IPI00790636;IPI00893580;IPI00792043;IPI00894161;IPI00643815;IPI00911054;IPI00796920;IPI00642800;IPI00641634;IPI00893920;IPI00892588;IPI00910878;IPI00894545;IPI00893927;IPI00893446;IPI00910759;IPI00642880;IPI00939221;IPI00792599;IPI00893059;IPI00641926;IPI00795722;IPI00791495;IPI00644541;IPI00908716;IPI00024539;IPI00794086	Spliceosome RNA helicase BAT1	BAT1	27	9	65.5	50.679	443	0	1.22954	1.24305	1.29868	1.07373	0.684697	1.09401	0.678196	0.517759	0.746938
IPI00641325;IPI00640787;IPI00893300	HLA-B associated transcript 1	BAT1	9	1	46	20.45	187	1.7716e-46
IPI00893641;IPI00010700;IPI00893120;IPI00894143;IPI00844237;IPI00642817;IPI00941272;IPI00942384;IPI00942936;IPI00940401;IPI00939397;IPI00940543;IPI00943144;IPI00084746;IPI00940155;IPI00941514;IPI00942314;IPI00943318;IPI00854786;IPI00941364;IPI00940875;IPI00885161;IPI00939969;IPI00941298;IPI00940175	HLA-B associated transcript 2	BAT2	26	25	21.6	228.85	2157	1.3738e-156	1.52388	1.3089	1.45457	0.951565	0.555586	0.693001	0.688468	0.592207	0.980873
IPI00941970;IPI00083708;IPI00739117;IPI00902898;IPI00852708;IPI00941219;IPI00902809;IPI00148247;IPI00902970;IPI00910607	BAT2 domain-containing protein 1	BAT2D1	28	27	17.7	296.06	2702	1.3201e-286	1.19763	1.23353	1.12566	1.24251	1.39813	1.1961	1.88143	1.84676	1.12834
IPI00741537;IPI00844323	Protein BAT2-like	BAT2L	9	6	5.3	242.96	2229	2.0234e-38	0.645411	1.17929			0.916086		1.03567	0.692089
IPI00892541;IPI00645431;IPI00894269;IPI00465128;IPI00894467;IPI00640922;IPI00642962;IPI00513728;IPI00641784;IPI00788873;IPI00641833;IPI00939983;IPI00795207;IPI00829720;IPI00795787;IPI00790683;IPI00793299;IPI00894130;IPI00941157;IPI00796135;IPI00792708	HLA-B associated transcript 3	BAT3	19	19	20.9	122.35	1162	5.1019e-202	1.09386	1.04519	1.02314	1.25937	1.34867	1.03524	0.648256	0.523725	0.495761
IPI00791049;IPI00033075;IPI00790465	cDNA FLJ77631, highly similar to Homo sapiens HLA-B associated transcript 5 (BAT5), mRNA	BAT5	6	6	12.8	67.518	601	7.2356e-33	0.932662	0.847242	1.20449	2.86862	2.8443	3.16166	0.505459	0.321161	0.688326
IPI00444945;IPI00443773;IPI00845474;IPI00071059;IPI00885203;IPI00439209;IPI00885178	Apoptosis regulator BAX	BAX	7	7	34.4	24.22	218	1.6844e-160	0.837311	0.797067	0.968148		0.526039	0.527816	0.973236	1.50677	1.60316
IPI00412415;IPI00383565	Bromodomain adjacent to zinc finger domain protein 1A	BAZ1A	13	13	10.9	178.7	1556	1.782e-34			0.562556	1.15276	2.00755	0.459728	1.10667		0.232364
IPI00069817;IPI00216695	Tyrosine-protein kinase BAZ1B	BAZ1B	16	16	11.9	170.9	1483	6.3562e-38		0.73303	0.429756	1.30892		0.204132	0.444405		0.191755
IPI00306961	Bardet-Biedl syndrome 2 protein	BBS2	2	2	3.5	79.87	721	0.0034863									27.0702
IPI00002406;IPI00554618	Lutheran blood group glycoprotein	BCAM	10	10	23.9	67.404	628	2.1235e-118	7.13369		4.06207	9.86096	9.12409		7.11642	31.2003
IPI00221233;IPI00514611;IPI00514847;IPI00515033;IPI00926856;IPI00927314;IPI00927085	B-cell receptor-associated protein 29	BCAP29	5	3	24.9	28.32	241	3.2973e-10			0.648046			0.160472	0.97229	1.09567	1.62327
IPI00642984;IPI00218200;IPI00641554;IPI00639976;IPI00646739;IPI00640444;IPI00930224;IPI00856053	cDNA FLJ33051 fis, clone TRACH1000063, highly similar to B-cell receptor-associated protein 31	BCAP31	18	17	37.4	34.752	313	5.9051e-136	0.948857	0.590179	0.93932	1.92593	2.12612	2.17014	0.82291	0.865801	1.10913
IPI00011998;IPI00872386;IPI00645994;IPI00641339;IPI00646673;IPI00740715;IPI00888329;IPI00887842	Breast cancer anti-estrogen resistance 1	BCAR1	9	6	13.7	95.338	888	1.8802e-41	0.323719	0.73497	0.331093	0.447167	0.721605	0.44403	1.11854	0.549149	0.432115
IPI00179053;IPI00642957	Breast cancer anti-estrogen resistance protein 3	BCAR3	8	8	12.8	92.565	825	1.252e-25	12.3191				8.25083	2.26716	9.21829		10.6141
IPI00744780;IPI00025311;IPI00793841;IPI00807587;IPI00908415;IPI00794332;IPI00909461	Breast carcinoma-amplified sequence 1	BCAS1	19	19	43.3	65.662	614	0	0.0813008		0.0444405	2.99321	10.1687	2.09965		0.189326	0.042425
IPI00025178	Pre-mRNA-splicing factor SPF27	BCAS2	10	10	52.4	26.131	225	1.9209e-102	0.566316	1.10143	0.511038	0.512243	0.581937	0.408614	0.558191	0.37449	0.248453
IPI00332097;IPI00411606;IPI00783452;IPI00332095;IPI00902682;IPI00909771;IPI00942101;IPI00902702;IPI00902821	Breast carcinoma-amplified sequence 3	BCAS3	9	9	11.3	105.16	965	3.6225e-83	0.803536	0.542859	0.91083	0.835352	2.19775	1.25677			0.792205
IPI00788925;IPI00396258;IPI00181135	Branched-chain-amino-acid aminotransferase	BCAT2	15	15	29.8	44.386	393	1.4319e-148	1.40544	0.916674	1.74773	2.06975	1.76666	2.50432	0.459876	0.666089	1.02924
IPI00002203;IPI00220152;IPI00068254;IPI00786906;IPI00909058	BRCA2 and CDKN1A-interacting protein	BCCIP	7	7	27.4	35.979	314	9.8855e-271	1.04442	1.32679	0.8036	0.399696	0.373301	0.437273	0.953471	0.732118	0.45333
IPI00444329;IPI00025100;IPI00910865;IPI00470386	cDNA FLJ45695 fis, clone FEBRA2013570, highly similar to 2-oxoisovalerate dehydrogenase alpha subunit, mitochondrial (EC 1.2.4.4)	BCKDHA	12	12	38.4	54.13	479	9.3764e-141	1.69851	1.2951	1.112	3.04257	3.91206	2.19829	1.22758	2.00441
IPI00011276;IPI00642832	2-oxoisovalerate dehydrogenase subunit beta, mitochondrial	BCKDHB	4	4	15.3	43.122	392	9.8846e-105	1.81739	1.24948				4.66527	1.3513	2.78567	2.06753
IPI00298612;IPI00062344;IPI00643414;IPI00910522	[3-methyl-2-oxobutanoate dehydrogenase [lipoamide]] kinase, mitochondrial	BCKDK	7	7	31.1	46.36	412	1.592e-16				2.23954		2.18895	0.76599	1.64393
IPI00022477	B-cell lymphoma/leukemia 10	BCL10	7	7	41.2	26.251	233	2.4428e-17	1.83746						8.98796	8.22166	7.32977
IPI00019983;IPI00219134;IPI00646996;IPI00646118;IPI00644343;IPI00219133;IPI00647529	Bcl-2-like protein 1	BCL2L1	2	2	8.2	26.049	233	0.0012701			1.73509				1.30208
IPI00011635;IPI00220829;IPI00384014;IPI00925297;IPI00853612;IPI00218043	Bcl-2-like protein 13	BCL2L13	12	12	36.9	52.723	485	5.6807e-250	2.97027	3.3456	3.3745	1.88597	2.42201	2.99303	1.7394	2.45369	2.9469
IPI00023787	Bcl-2-like protein 2	BCL2L2	1	1	9.8	20.774	193	8.0291e-10
IPI00025428;IPI00791379;IPI00922258;IPI00893435	B-cell lymphoma 3-encoded protein	BCL3	1	1	4.3	56.913	539	0.0042375
IPI00328798;IPI00878029;IPI00939359;IPI00877936;IPI00746747	B-cell CLL/lymphoma 9-like protein	BCL9L	6	6	7.6	157.13	1499	1.5166e-52	0.794281	1.13902	0.730034	0.637633		0.577834	0.733837
IPI00006079;IPI00413671;IPI00413672;IPI00886854;IPI00886987;IPI00413673	Bcl-2-associated transcription factor 1	BCLAF1	19	19	23.4	106.12	920	3.7667e-53	1.1768	1.876	1.03087	0.96367	0.706215	0.9994	0.849401	0.921914	0.676773
IPI00004497;IPI00472302;IPI00332355;IPI00742062;IPI00916237;IPI00425739;IPI00937409	Breakpoint cluster region protein	BCR	7	4	8.3	142.82	1271	8.8067e-40	1.2078	1.01697	1.62662	0.737354	0.717412	0.684978	1.14342	1.54974	1.71435
IPI00003985;IPI00925074;IPI00924626;IPI00924601;IPI00927724;IPI00925726;IPI00927504	Mitochondrial chaperone BCS1	BCS1L	14	14	45.3	47.534	419	9.7351e-110	0.452223	0.272264	0.409165	0.862366	0.58309	0.966557	0.327504	0.5124	0.81686
IPI00025341;IPI00925346;IPI00926064;IPI00925592;IPI00926272;IPI00925842;IPI00926718;IPI00794146;IPI00926954	D-beta-hydroxybutyrate dehydrogenase, mitochondrial	BDH1	15	15	54.8	38.157	343	1.7228e-299	0.110758	0.174517	0.224765	2.68601	2.20124	3.74237	0.254362	0.2488	0.289017
IPI00607799;IPI00446769;IPI00398129	3-hydroxybutyrate dehydrogenase type 2	BDH2	4	4	19.2	26.724	245	2.8134e-22									8.04311
IPI00748342;IPI00908910;IPI00796952	Beclin-1	BECN1	4	4	14.4	51.896	450	1.8826e-15							1.02989
IPI00741958	BEN domain-containing protein 3	BEND3	2	2	3.5	94.474	828	3.0388e-11							0.473507
IPI00004101;IPI00910055;IPI00014363;IPI00922635	Betaine--homocysteine S-methyltransferase 1	BHMT	3	3	11.3	44.998	406	6.2634e-48
IPI00337667;IPI00178185	Protein bicaudal D homolog 2	BICD2	16	14	17.8	96.805	855	3.4876e-41	1.23169	1.25042	1.24894	1.36722	0.352759	0.373371	2.84366	2.47647	2.00807
IPI00420084;IPI00413587;IPI00943215;IPI00472003;IPI00385121;IPI00896390	BH3-interacting domain death agonist	BID	7	7	44.8	26.836	241	6.4837e-249	0.639959	0.568666	0.53723	0.416962	0.412048	0.436395	0.325309	0.297672	0.257632
IPI00032966;IPI00556562	Bridging integrator 3	BIN3	2	2	9.5	29.665	253	4.5712e-12							6.35203	8.91583
IPI00299635;IPI00939720;IPI00893564	Baculoviral IAP repeat-containing protein 6	BIRC6	19	19	5.6	530.25	4857	2.5003e-94	0.720513	0.698129	0.644787	0.759936	1.08273	1.00734	0.916926	1.00546	0.861846
IPI00219575	Bleomycin hydrolase	BLMH	12	3	31.2	52.562	455	3.7302e-65	0.525348	0.48974	0.690322	0.385238	0.246786	0.294403	0.143353	0.122252	0.230282
IPI00020319;IPI00796973;IPI00795698	Biogenesis of lysosome-related organelles complex 1 subunit 1	BLOC1S1	5	5	36.6	17.262	153	1.4867e-33		0.394291	0.569638	0.68686	0.994332	1.37204	0.935804	0.919033	1.08633
IPI00411983;IPI00163483	Biogenesis of lysosome-related organelles complex 1 subunit 2	BLOC1S2	2	2	13.4	15.961	142	2.2494e-13	0.435616								1.1884
IPI00397721	Biogenesis of lysosome-related organelles complex 1 subunit 3	BLOC1S3	2	2	7.4	21.255	202	0.007402	0.653467	0.756487		1.2813	0.923276
IPI00294158;IPI00925847;IPI00926066	Biliverdin reductase A	BLVRA	16	16	44.9	33.428	296	8.6521e-130	1.24	1.06299	2.4849	0.901876	0.362109	0.858148	0.713165	0.696136	1.73762
IPI00219910;IPI00783862	Flavin reductase	BLVRB	15	15	74.4	22.19	207	2.6265e-280	0.554447	0.529886	0.793903	1.0349	1.102	1.13514	0.239705	0.322539	0.401043
IPI00009054	Bone morphogenetic protein 1	BMP1	2	1	2.8	111.25	986	1.8827e-14							28.5714
IPI00923496;IPI00014021;IPI00218045;IPI00218044	Bone morphogenetic protein 1 isoform 1, variant	BMP1	2	1	2.6	90.63	803	9.3179e-09
IPI00006099;IPI00935393;IPI00879994;IPI00790085;IPI00880141;IPI00401843;IPI00874269;IPI00867707;IPI00941020;IPI00880017;IPI00942611;IPI00791193;IPI00879919	Ribosome biogenesis protein BMS1 homolog	BMS1	14	14	12.6	145.81	1282	7.7895e-190	0.6595	1.60218	0.486452	1.12227	1.01841	0.646371	0.524246	0.497141	0.562082
IPI00215704;IPI00030397;IPI00215701;IPI00215703	Vesicle transport protein SEC20	BNIP1	9	9	39.5	26.132	228	2.221e-70	0.351296	0.332005	0.290015	1.39456	0.639018	0.940026	0.310058	0.53322	0.392835
IPI00028419;IPI00793422;IPI00791679	BCL2/adenovirus E1B 19 kDa protein-interacting protein 3-like	BNIP3L	2	2	15.2	25.433	230	5.3513e-08								1.15165
IPI00032900	BolA-like protein 1	BOLA1	4	4	46	14.289	137	1.18e-167	0.409266	0.626488	0.461808		0.745156		0.411658	0.330743	0.332823
IPI00301434;IPI00747913;IPI00410226;IPI00873049	BolA-like protein 2	BOLA2	7	7	46.7	16.932	152	4.0104e-138	0.602192	0.658371	0.655437	0.549541	1.13222	1.03489	0.482719	0.390564	0.438193
IPI00412229	BolA-like protein 3	BOLA3	1	1	12.1	12.114	107	0.0026564								0.635526
IPI00028955;IPI00741996	Ribosome biogenesis protein BOP1	BOP1	13	13	16.4	83.629	746	1.9008e-64	1.0376	1.02167	0.866701	0.927644	0.537288	0.95229	0.393546	0.408764	0.47856
IPI00215979;IPI00556284	Bisphosphoglycerate mutase	BPGM	3	3	20.5	30.005	259	2.7866e-08	13.8968
IPI00384428;IPI00003990;IPI00909698;IPI00844403;IPI00925185	Valacyclovir hydrolase	BPHL	11	11	50.2	32.542	291	6.013e-74	0.533646	0.395601	0.507485	1.86745	1.05376	1.72129	0.516929	0.616257	1.02954
IPI00296654	Bactericidal/permeability-increasing protein-like 1	BPIL1	5	1	19.7	49.172	458	3.2546e-14						20.3252
IPI00410214;IPI00910437;IPI00410215	3'(2'),5'-bisphosphate nucleotidase 1	BPNT1	17	17	58.1	33.392	308	0	2.42342	1.53622	2.33781	4.54959	5.00676	6.83387	0.912659	1.21944	1.77907
IPI00785110;IPI00254408;IPI00376404;IPI00024532;IPI00911006	Nucleosome-remodeling factor subunit BPTF	BPTF	6	6	2.8	338.26	3046	2.0868e-17	0.953925		0.614931	1.37165					0.248114
IPI00396089;IPI00908635;IPI00792737;IPI00791647	BRCA1-associated protein	BRAP	2	2	6.2	67.29	592	2.6656e-11	0.890155	0.910913
IPI00412408	Breast cancer type 2 susceptibility protein	BRCA2	4	4	1.3	384.22	3418	0.010326	1.5939
IPI00939471;IPI00008289;IPI00936224;IPI00871617;IPI00929376;IPI00943016;IPI00853631;IPI00853437	Lys-63-specific deubiquitinase BRCC36	BRCC3	9	9	37.2	36.239	317	2.8431e-194	0.97371	0.788768	0.99552	1.13443	1.53886	1.44718	1.05436	1.29761	1.22533
IPI00440502;IPI00797929;IPI00942517;IPI00014414;IPI00894013;IPI00893622;IPI00893088;IPI00894424;IPI00894298;IPI00893552;IPI00794051;IPI00893701	Bromodomain-containing protein 2	BRD2	8	5	14	92.032	836	7.3481e-10							1.29799	1.31149	0.861772
IPI00014266;IPI00410716;IPI00880042	Bromodomain-containing protein 3	BRD3	8	3	9.9	79.541	726	1.7566e-27			0.681803	1.1454
IPI00440727;IPI00477699;IPI00440728;IPI00940018;IPI00892847;IPI00894118	Bromodomain-containing protein 4	BRD4	19	12	15.3	152.22	1362	1.032e-39	2.57447	3.56455	2.62323	0.772439	1.11868		0.843313		0.486074
IPI00019226;IPI00148057;IPI00878385;IPI00828194;IPI00878545;IPI00878188;IPI00877679;IPI00878882;IPI00878733;IPI00877831	Bromodomain-containing protein 8	BRD8	3	3	3.6	135.36	1235	4.8317e-08
IPI00930290;IPI00908515;IPI00549384;IPI00759680;IPI00479047	Bromodomain-containing protein 9	BRD9	2	2	5.4	66.999	597	0.0041722
IPI00164724;IPI00149276;IPI00719447;IPI00446802;IPI00874261;IPI00892695;IPI00877161	BRCA1-A complex subunit BRE	BRE	11	11	33.7	43.551	383	1.0947e-140	0.72759	0.679579	0.977326	0.935016	0.95039	1.37001	0.871612	1.17498	1.14737
IPI00103599;REV_IPI00152007	BRI3-binding protein	BRI3BP	3	3	12	27.835	251	1.1743e-56			0.655351						0.381039
IPI00012500;IPI00514398	Fanconi anemia group J protein	BRIP1	12	12	11.8	140.88	1249	4.9051e-84	0.177173	0.358333	0.173031	1.274		0.534359	0.381127	0.305801	0.0923702
IPI00436518	Benzodiazepine receptor ligand	BRL	2	2	39.1	10	87	0.00059297									11.0138
IPI00065500;IPI00922787;IPI00644855	BRO1 domain-containing protein BROX	BROX	12	11	36	46.476	411	0	6.47668	4.77008	9.0082	6.41601	5.72836	7.07614	1.49058	1.74608	1.73256
IPI00009335;IPI00741734;IPI00937343;IPI00930221;IPI00794094	Brain protein 16	BRP16	10	10	39.5	42.129	390	1.3502e-65	0.506817	0.534017	0.679625	1.42892	1.33842	1.54741	0.432376	0.407997
IPI00022832;IPI00640179	Brain protein 44	BRP44	3	3	30.7	14.279	127	3.7856e-21	1.2417	1.12483	1.63039	6.44621	10.1541	4.62684		1.24533	1.27778
IPI00412224;IPI00943071;IPI00908722	Bromodomain and WD repeat-containing protein 2	BRWD2	17	17	17.1	136.68	1224	7.1328e-146	1.70088	1.14548	2.39998	2.22252	1.86029	2.83664	1.42349	1.94352	2.38101
IPI00479357;IPI00877921;IPI00878093;IPI00783278;IPI00045906;IPI00877791;IPI00879194	Seipin	BSCL2	1	1	1.9	51.286	464	0.0049144
IPI00018026;IPI00941916;IPI00414093;IPI00844452;IPI00909833;IPI00910328;IPI00908918;IPI00844593;IPI00844524	BSD domain-containing protein 1	BSDC1	4	4	9.9	51.166	474	1.048e-30	1.10542	0.839772	1.00743		3.88425	3.06645	0.928419	1.13473	1.53207
IPI00218019;IPI00019906;IPI00394877;IPI00908477	Basigin	BSG	6	6	21	42.2	385	7.8047e-152	1.6234	2.21009	1.91424	0.611172		0.332701	2.86993	4.48773	2.54104
IPI00301791;IPI00185568	B box and SPRY domain-containing protein	BSPRY	4	4	12.7	44.381	402	3.152e-08			2.27402	1.14929
IPI00909718;IPI00026241	cDNA FLJ59809, highly similar to Bone marrow stromal antigen 2	BST2	2	2	11.6	23.537	216	3.5333e-37		0.556143	0.301232	1.6465		2.27319
IPI00024802	TATA-binding protein-associated factor 172	BTAF1	8	8	6.4	206.89	1849	4.9619e-92	1.5484	1.13903	1.52219	1.53615	1.13958	1.98377	1.51543	1.65642
IPI00221035;IPI00419473;IPI00258884;IPI00015945;IPI00015946	Transcription factor BTF3	BTF3	11	11	57.8	22.168	206	0	0.653168	0.736865	0.570386	0.637024	0.684229	0.490581	1.31501	1.16086	0.712251
IPI00412792	Transcription factor BTF3 homolog 4	BTF3L4	8	3	65.8	17.27	158	1.8628e-256	1.21281	1.03128	1.15954	1.6038	1.2134	1.95259	0.626606	0.720305	0.910001
IPI00844417	Basic transcription factor 3-like 4, isoform CRA_c	BTF3L4	6	1	90	10.905	100	4.2017e-193				1.50202
IPI00783305;IPI00916549	Mitotic checkpoint serine/threonine-protein kinase BUB1	BUB1	2	2	3.3	122.37	1085	0.0027016	1.5626
IPI00013468;IPI00514701;IPI00644108;IPI00644568	Mitotic checkpoint protein BUB3	BUB3	13	13	49.4	37.154	328	1.4341e-296	1.04267	1.03823	1.14282	1.0358	0.82021	1.02683	0.903996	0.697399	0.535475
IPI00013180;IPI00922484;IPI00926757;IPI00925240;IPI00925053;IPI00925500	Protein BUD31 homolog	BUD31	9	9	54.2	17	144	1.5621e-22	0.28108	0.339766	0.413001	0.722439	1.40119	0.462043	0.375784	0.159762	0.240535
IPI00396329;IPI00478298;IPI00644504	Brix domain-containing protein 1	BXDC1	9	9	30.4	35.582	306	1.187e-42		1.12433	0.657722	4.26548		1.64034	0.926097		0.565036
IPI00181728	Brix domain-containing protein 2	BXDC2	11	11	36.3	41.401	353	1.2633e-70	1.03337	0.750863	0.835352	2.80222		1.41868	0.356113	0.496229	0.511065
IPI00292221	Ribosome production factor 1	BXDC5	2	2	8	40.11	349	3.8674e-09
IPI00328987	Bystin	BYSL	13	13	37.1	49.601	437	2.845e-103	0.880127	0.944912	0.714898	1.03257	0.68055	0.668137	1.05021	0.618391	0.520996
IPI00916503;IPI00916112;IPI00785096;IPI00918019;IPI00180128;IPI00900322;IPI00903257;IPI00917597;IPI00916338;IPI00916463;IPI00915826;IPI00916588	cDNA FLJ55789, highly similar to Rattus norvegicus basic leucine zipper and W2 domains 1 (Bzw1), mRNA	BZW1	32	30	57.6	51.281	451	9.4414e-295	0.632591	0.558815	0.723014	0.932749	0.877655	0.960707	1.17286	1.10391	1.14217
IPI00022305;IPI00894416;IPI00892775;IPI00892893;IPI00893174;IPI00807524;IPI00893030;IPI00064431;IPI00892766;IPI00892637;IPI00893309	Basic leucine zipper and W2 domain-containing protein 2	BZW2	20	18	42.5	48.162	419	1.6152e-181	0.575175	0.478629	0.614137	1.37754	1.43414	1.29259	0.699839	0.797894	0.626056
IPI00060893	UPF0448 protein C10orf104	C10orf104	2	2	42.7	11.667	110	4.8509e-74
IPI00478758;IPI00552546	UPF0557 protein C10orf119	C10orf119	8	8	17.3	72.979	642	7.0379e-103	1.69595	2.16427	1.39762	0.929195	1.12991	0.597872	1.80437	2.35305	0.727114
IPI00942052	Putative uncharacterized protein C10orf134	C10orf134	2	2	3.3	39.641	363	0.00017859
IPI00303253;IPI00939287;IPI00479408	UPF0693 protein C10orf32	C10orf32	2	2	33	11.695	106	2.2284e-21	0.514112					0.0736431
IPI00329115;IPI00641934;IPI00647239;IPI00873200	Uncharacterized protein C10orf47	C10orf47	2	2	5.5	45.801	435	0.00041692							1.03524	0.86798
IPI00296190;IPI00646289;IPI00646889;IPI00939991	Uncharacterized protein C10orf58	C10orf58	10	10	39.3	25.764	229	6.1738e-94	0.329891	0.25271	0.292073	1.81769	3.55252	2.41668	0.700378	0.741565	0.820345
IPI00646323;IPI00843920;IPI00375664;IPI00902691	UPF0668 protein C10orf76	C10orf76	5	5	10	78.71	689	4.4746e-55		0.720461	0.787092		1.41872	1.98303			1.56693
IPI00743673;IPI00477120;IPI00885001;IPI00876978;IPI00418714	PH domain-containing protein C10orf81	C10orf81	2	2	7.5	52.535	465	1.7391e-09
IPI00003320	UPF0197 transmembrane protein C11orf10	C11orf10	1	1	10.1	9.0788	79	0.00035261		1.08036	0.966744					0.427259
IPI00152627;IPI00872314;IPI00922191;IPI00413757	C11orf30 protein	C11orf30	3	3	3.6	143.19	1337	6.3872e-37				0.501228	0.81281
IPI00217662	Uncharacterized protein C11orf35	C11orf35	2	1	2.4	70.408	634	0.012369
IPI00072044;IPI00761072;IPI00061507;IPI00760666	Ester hydrolase C11orf54	C11orf54	8	8	27.6	35.117	315	2.1185e-58	4.55705	2.82869	5.68505	4.54194	5.15889	8.4168		0.884017	1.46199
IPI00016670	UPF0404 protein C11orf59	C11orf59	6	6	59.6	17.745	161	8.0193e-113	0.323196	0.497859	0.456913	0.900009	0.495319	0.850847	0.444148	0.539142	1.5604
IPI00100775;IPI00022308;IPI00748229	UPF0366 protein C11orf67	C11orf67	4	4	39.3	13.332	122	1.3015e-52		1.34635
IPI00914048;IPI00027794;IPI00940858	UPF0696 protein C11orf68	C11orf68	8	8	33.4	31.517	293	1.0237e-89	0.395946	0.571102			0.448974		0.735456	0.858222	1.55015
IPI00410091;IPI00908520	Uncharacterized protein C11orf73	C11orf73	5	5	27.4	21.627	197	1.6111e-53	0.380373	0.421141		0.555833	0.258311		0.450187	0.392881	0.703779
IPI00016443	Protein EMI5 homolog, mitochondrial	C11orf79	2	2	8.4	19.599	166	8.3509e-06	1.30878		1.08189			1.08063
IPI00432065	Uncharacterized protein C11orf83	C11orf83	4	4	47.3	10.111	93	5.7738e-56	0.572836	1.06434					0.574944	0.242395
IPI00550986;IPI00182406	Uncharacterized protein C12orf11	C12orf11	7	7	14.3	80.224	706	4.7649e-13	1.81465						0.939055		0.568537
IPI00184546	UPF0444 transmembrane protein C12orf23	C12orf23	5	5	62.9	11.748	116	6.9939e-163	0.775194	0.785053		0.751089	0.65475	1.26119	1.20478	1.08174	1.41105
IPI00795287;IPI00550410;IPI00465230	Uncharacterized protein C12orf29	C12orf29	2	2	5.5	37.49	325	0.013198	1.44461		1.63508	1.03078	0.773994	1.66038
IPI00025890;IPI00852843;IPI00796935;IPI00797759	TPR repeat-containing protein C12orf30	C12orf30	23	23	24.1	112.29	972	4.2376e-125	1.16356	0.977995	1.08372	1.26576	1.13968	1.61062	0.724848	0.688373	0.863111
IPI00305296;IPI00796677	UPF0453 protein C12orf44	C12orf44	3	3	17	25.002	218	2.606e-09	0.706614		0.597764
IPI00166861;IPI00796375	Uncharacterized protein C12orf45	C12orf45	2	2	14.9	20.464	188	4.9224e-23
IPI00016925;IPI00796572	Protein C10	C12orf57	6	6	81.7	13.178	126	7.2973e-258	1.15755	1.12983	0.808016		1.67252	0.790514	0.929627		0.673219
IPI00465410	Uncharacterized protein C12orf73	C12orf73	1	1	25.4	7.9694	71	2.3259e-05
IPI00292688;IPI00797298	UPF0124 protein C13orf31	C13orf31	3	3	12.1	47.78	430	9.4435e-19							12.1665
IPI00007730	Probable ergosterol biosynthetic protein 28	C14orf1	3	3	19.3	15.864	140	5.8714e-05				0.953652			0.860437	1.56698	1.2425
IPI00375471;IPI00412789	UPF0679 protein C14orf101	C14orf101	1	1	2.1	79.527	707	0.0004557
IPI00477539;IPI00641428;IPI00303565;REV_IPI00455985	UPF0614 protein C14orf102	C14orf102	5	5	5.6	132.42	1164	2.3452e-17	0.539636		0.654065	0.598946			0.296051		1.37236
IPI00062050	Probable D-tyrosyl-tRNA(Tyr) deacylase 2	C14orf126	2	2	19.6	18.66	168	1.053e-16							0.51143
IPI00941851;IPI00398786;IPI00004958;IPI00910378	Uncharacterized protein C14orf133	C14orf133	10	10	23.7	57.005	493	6.3155e-52	0.536164	0.397899	0.568311	0.675858	0.788022	1.07579	0.603173	0.801539	0.803794
IPI00032506	Uncharacterized protein C14orf142	C14orf142	2	2	34	10.859	100	1.3196e-16							0.280828
IPI00386591;IPI00909660	Probable proline racemase	C14orf149	1	1	4.8	38.167	354	1.6781e-12
IPI00411520;IPI00328650;IPI00328443;IPI00411523;IPI00411522	UPF0317 protein C14orf159, mitochondrial	C14orf159	2	2	5.6	66.926	621	0.0042227
IPI00006980;IPI00792100	UPF0568 protein C14orf166	C14orf166	17	17	71.7	28.068	244	0	1.00245	1.07715	1.01951	0.751541	0.7347	0.917684	0.937207	0.778938	1.00817
IPI00216999;IPI00793080	Pumilio domain-containing protein C14orf21	C14orf21	10	10	25.9	69.437	636	1.4565e-168	1.07234	0.97144	0.717978		0.749008	0.720254	0.53056	0.394836	0.353582
IPI00784739;IPI00878852;IPI00879168;IPI00847564	Uncharacterized protein C14orf43	C14orf43	4	4	5.5	114.99	1045	2.4785e-11								0.862292
IPI00008437	Probable ribosome biogenesis protein RLP24	C15orf15	1	1	11	19.621	163	3.4341e-16
IPI00024551;IPI00793489;IPI00795993;IPI00791879	UPF0480 protein C15orf24	C15orf24	5	5	27.3	26.47	242	2.156e-11	0.813206	0.813008		1.2478	1.11479	1.19204	0.784621		0.927386
IPI00915991;IPI00074225	UPF0552 protein C15orf38	C15orf38	4	3	12.3	35.518	317	0.00012969	5.14483						6.76315
IPI00783753;IPI00792462	UPF0235 protein C15orf40	C15orf40	1	1	8.5	16.353	153	0.00066987
IPI00032525;IPI00796879	Uncharacterized protein C15orf41	C15orf41	1	1	4.3	32.264	281	0.0092317
IPI00853221;IPI00413144;IPI00171480	Uncharacterized protein C15orf42	C15orf42	1	1	0.5	210.85	1910	0.0020405									14.4229
IPI00306017;IPI00941221;IPI00910192;IPI00914573	cDNA FLJ55475	C15orf44	7	7	17.7	61.345	554	3.8731e-60	0.859107	0.801539	0.800064	0.805283	0.956755	0.715359	0.860956	0.477122	0.679394
IPI00412676;IPI00854844;IPI00746995;IPI00445162	Uncharacterized protein C15orf52	C15orf52	4	4	9.6	57.324	534	1.4867e-09									10.8059
IPI00418644	UPF0580 protein C15orf58	C15orf58	2	2	8.6	42.249	385	0.00061712							0.497735
IPI00376058	UPF0583 protein C15orf59	C15orf59	1	1	3.8	31.928	293	0.015174
IPI00745105;IPI00746178;IPI00747270;IPI00893549;IPI00749346;IPI00065475	UPF0585 protein C16orf13	C16orf13	8	8	45.6	22.578	204	4.0302e-72	0.212193	0.276327	0.332127	2.50488	3.2774	2.99572		1.38326	1.50263
IPI00011693	UPF0293 protein C16orf42	C16orf42	1	1	4.8	33.596	312	2.8111e-35
IPI00305627;IPI00909885;IPI00908670;IPI00385776	UPF0420 protein C16orf58	C16orf58	7	7	19.4	51.017	468	2.3711e-86	0.690226	0.608236	0.956389	2.64487	2.82135	3.56786	0.364405	0.421283	0.637633
IPI00024619	Uncharacterized protein C16orf61	C16orf61	2	2	40.5	9.4598	79	2.069e-10
IPI00465238;IPI00872797;IPI00107728;IPI00909793	UPF0505 protein C16orf62	C16orf62	16	16	19.3	111.26	980	6.3684e-90	1.28097	0.803342	1.8647		0.261253		1.38118	1.73925	2.82877
IPI00013779	UPF0183 protein C16orf70	C16orf70	1	1	4.7	47.524	422	0.005466
IPI00001655;IPI00910720	UPF0468 protein C16orf80	C16orf80	6	6	33.7	22.774	193	3.0671e-113			1.26585		0.519103		1.08064	0.968804	1.145
IPI00554560	Protein C16orf88	C16orf88	6	6	16.2	51.588	458	1.2796e-36			0.21462	1.32695		1.34833		0.189043	0.295186
IPI00002884	PKHD domain-containing transmembrane protein C17orf101	C17orf101	1	1	4.1	35.646	319	1.6607e-08
IPI00007102;IPI00745272;IPI00909336;IPI00032575;IPI00922891;IPI00792035	cDNA FLJ76436	C17orf25	20	20	31.2	55.011	504	6.0286e-292	1.33948	1.23926	1.57354	0.976658	0.860733	1.09024	0.779241	0.93633	1.26933
IPI00783706;IPI00607714;IPI00247634	UPF0663 transmembrane protein C17orf28	C17orf28	20	20	31.7	88.743	788	1.7656e-162	0.141097	0.155972	0.129611	2.68176	3.27375	2.35549	0.115303	0.0735348	0.096581
IPI00031616;IPI00878073	Uncharacterized protein C17orf37	C17orf37	6	6	25.2	21.613	206	1.1936e-10			1.04095	5.26067	17.8817	9.44287	1.04408		1.44942
IPI00217151	Uncharacterized protein C17orf39	C17orf39	1	1	3	33.514	300	0.011466
IPI00170503;IPI00900278;IPI00789486;IPI00788883;IPI00910480	UPF0629 protein C17orf42	C17orf42	4	4	15	41.676	360	9.2112e-50		0.583431		2.55833		1.83157	0.574713	1.19659
IPI00373869;IPI00790228;IPI00793392	Uncharacterized potential DNA-binding protein C17orf49	C17orf49	4	4	25	19.961	192	1.7692e-76	0.453001		0.794218		0.465983		0.451182	0.947957	0.59641
IPI00166483;IPI00797663	UPF0451 protein C17orf61	C17orf61	2	2	31.9	11.741	113	7.8751e-69	0.785916			0.918864			2.89931		3.69535
IPI00001578;IPI00792773;IPI00795592;IPI00791476;IPI00794964	Uncharacterized protein C17orf62	C17orf62	3	3	15	20.774	187	2.6729e-17	0.890869	0.811557		1.48483
IPI00018087;IPI00855745	Uncharacterized protein C17orf68	C17orf68	1	1	1	134.58	1217	0.0092317
IPI00029473	Protein Njmu-R1	C17orf75	7	7	17.4	44.621	396	1.8804e-24			0.600204			1.30444	0.538619	0.65083	0.85918
IPI00782974;IPI00032056	Uncharacterized protein C17orf85	C17orf85	5	5	8.4	70.592	620	2.3671e-30			0.795798					2.06156	0.806387
IPI00290799;IPI00641597;IPI00639892	Uncharacterized protein C18orf19	C18orf19	5	5	25.4	30.804	272	1.6958e-50	0.970591	0.60006	0.993542	1.77148	1.46615	1.85518	1.17751	1.48449	1.3297
IPI00152407;IPI00059687	Uncharacterized protein C18orf25	C18orf25	2	2	9.6	37.048	343	3.5357e-21					0.725005
IPI00306439;IPI00640038;IPI00640495	TIM21-like protein, mitochondrial	C18orf55	2	2	8.9	28.202	248	0.0027107					8.97908
IPI00149964;IPI00647260;IPI00643380	Uncharacterized protein C18orf8	C18orf8	6	6	14	74.974	657	5.3383e-40	0.803471	0.325034	1.91329	0.494707		0.846453	0.612557	0.849041
IPI00056357	UPF0556 protein C19orf10	C19orf10	5	5	30.6	18.795	173	3.3219e-43	1.20954	0.92773	1.48441	1.84836	2.2605	2.21971	1.30639	1.29747	2.09148
IPI00217121	Uncharacterized protein C19orf21	C19orf21	19	19	32.7	75.356	679	2.4446e-57	0.791139	3.42384	0.866101	1.52569	8.40548	1.75396	3.16526		0.447688
IPI00060714	R3H domain-containing protein C19orf22	C19orf22	2	2	13.4	30.349	268	1.435e-16		0.446209
IPI00298662;IPI00789616;IPI00910213	UPF0449 protein C19orf25	C19orf25	1	1	12.4	17.174	161	0.005466
IPI00031526	Uncharacterized protein C19orf43	C19orf43	4	4	35.2	18.419	176	1.4783e-07			0.378487	0.952835					0.430719
IPI00157215	Uncharacterized protein C19orf52	C19orf52	4	4	15.8	29.233	260	9.7083e-07	1.02374	0.779545	0.444365	2.07336	3.60334	1.3046	0.880902		0.642467
IPI00022317	Leydig cell tumor 10 kDa protein homolog	C19orf53	3	3	17.2	10.576	99	6.3428e-05		0.468099		1.80489	0.569606	1.23697			0.564334
IPI00718821;IPI00871575	Uncharacterized protein C19orf55	C19orf55	1	1	1.5	51.074	480	0.0055377
IPI00880178;IPI00744558;IPI00419642;IPI00384722	UPF0510 protein C19orf63	C19orf63	3	3	10.4	28.003	269	2.5409e-67	0.949127		0.933881	1.02067	0.993147		0.701508	0.506227	0.625039
IPI00413853;IPI00383563;IPI00167592;IPI00642518	UPF0515 protein C19orf66	C19orf66	2	2	8.2	33.11	291	0.00012971									4.84215
IPI00024566;IPI00845228;IPI00893888;IPI00894285	Glycoprotein-N-acetylgalactosamine 3-beta-galactosyltransferase 1	C1GALT1	5	5	23.4	42.202	363	2.3041e-09							3.78759	3.26147	2.37029
IPI00479789;IPI00296858	Uncharacterized protein C1orf103	C1orf103	2	2	3.5	84.567	769	2.1282e-05			1.42529						0.671141
IPI00016605;IPI00514522	UPF0587 protein C1orf123	C1orf123	6	6	39.4	18.048	160	1.9673e-07	1.32519	0.846167	0.702494	0.917515	1.03674	1.13623	0.675265	0.801796	1.09137
IPI00015351;IPI00643524;IPI00910270;IPI00643061	UPF0424 protein C1orf128	C1orf128	8	8	35.1	24.178	211	2.4212e-136	1.03818	1.0246	1.18005	0.933794	1.21081	1.22923	1.75414	1.52476	2.11784
IPI00845227;IPI00941716;IPI00470641;IPI00646945;IPI00513772	Uncharacterized protein C1orf131	C1orf131	1	1	4.1	32.766	294	0.001007
IPI00470594;IPI00855711;IPI00855815;IPI00855947;IPI00940320;IPI00908578	UPF0485 protein C1orf144	C1orf144	2	2	23.7	16.997	152	0.0010382						0.0792267
IPI00939799;IPI00816419	C1orf151 protein	C1orf151	2	1	20.4	10.413	93	4.3484e-06						2.75421			2.31857
IPI00872862;IPI00062298	Putative uncharacterized protein C1orf151	C1orf151	2	1	19.2	8.688	78	0.0029477
IPI00303753	Hcp beta-lactamase-like protein C1orf163	C1orf163	8	8	42	25.709	231	1.1012e-82	0.844809	1.13833	1.09848	2.05074	5.26288	3.33145		0.715922	0.881601
IPI00013912;IPI00914884;IPI00914909	Uncharacterized protein C1orf198	C1orf198	4	4	15.3	36.346	327	2.0433e-20			3.3592		4.35218
IPI00917484;IPI00401682;IPI00917608;IPI00917912;IPI00893882	Uncharacterized protein C1orf226	C1orf226	2	1	21.7	19.145	180	5.4022e-62
IPI00830136;IPI00552131;IPI00045660;IPI00646750	Uncharacterized protein C1orf31	C1orf31	4	4	26.3	18.094	156	1.6211e-36			1.17841		36.7202	7.02839	0.886997		0.628101
IPI00012198;IPI00909125	Uncharacterized protein C1orf50	C1orf50	6	6	55.3	21.876	199	1.323e-38	0.555093	0.793336			1.11557		0.786349		1.89107
IPI00167998;IPI00871233;IPI00643818	UPF0667 protein C1orf55	C1orf55	1	1	4	49.741	451	0.012794
IPI00031570;IPI00514501	Nucleoside-triphosphatase C1orf57	C1orf57	9	9	59.5	20.713	190	5.7234e-115	3.06626	2.92783	2.79744	5.53495	6.77186	7.99808	0.849401	1.19035	1.2594
IPI00145260	Putative transferase C1orf69, mitochondrial	C1orf69	6	6	29.2	38.155	356	8.215e-73	1.23333			11.8932	10.8483	13.2293	1.08598	1.278
IPI00719040;IPI00300990;IPI00470438;IPI00644245;IPI00903173	Uncharacterized protein C1orf77	C1orf77	3	3	16.9	26.524	249	2.1319e-39			1.02594			1.31815			0.727379
IPI00647672	Uncharacterized protein C1orf85	C1orf85	1	1	6.4	43.864	406	1.7031e-27
IPI00908363;IPI00910916;IPI00383997;IPI00152199;IPI00643409	cDNA FLJ54774	C1orf93	4	4	28.6	24.121	224	1.3122e-162	0.978665	0.897747	1.24701			1.83019	1.21437		1.62678
IPI00014230;IPI00796075;IPI00796630	Complement component 1 Q subcomponent-binding protein, mitochondrial	C1QBP	8	8	51.4	31.362	282	9.2298e-238	1.24358	1.17611	1.1236	1.06176	1.2242	1.09541	0.853534	1.05937	0.93835
IPI00643667;IPI00742875;IPI00008860;IPI00425976;IPI00930111;IPI00903313	C1q and tumor necrosis factor related protein 3	C1QTNF3	1	1	2.2	35.183	319	0.011524
IPI00096986	Transmembrane protein C20orf108	C20orf108	3	3	26.6	20.424	192	9.5305e-09							2.22395	3.80633
IPI00016634;IPI00909074	Protein C20orf11	C20orf11	4	4	24.6	26.748	228	7.4455e-56			0.799424			1.12813
IPI00797771;IPI00915294;IPI00942898;IPI00022274	Uncharacterized protein C20orf117	C20orf117	9	8	6.7	183.86	1661	4.3486e-22			2.56746			1.90734			0.533447
IPI00552634;IPI00101095;IPI00395779;IPI00375962	Chromosome 20 open reading frame 27	C20orf27	5	5	33.7	21.645	199	4.4229e-40	0.573789	0.647668	0.775014	0.547615	0.472567	0.531802	0.409383	0.366744	0.44236
IPI00746691;IPI00641887;IPI00023023	UPF0414 transmembrane protein C20orf30	C20orf30	1	1	6	19.91	183	0.0047813						2.0434
IPI00791333;IPI00166013	Chromosome 20 open reading frame 4	C20orf4	6	6	23.9	45.034	398	1.248e-98		1.03909				0.630557	0.632191
IPI00218962;IPI00297121;IPI00792861;IPI00909332	Chromosome 20 open reading frame 43	C20orf43	9	9	32.7	37.499	336	1.7122e-54	0.43779	0.758495	0.369194		0.690655	0.229279	0.603391		0.118237
IPI00106573;IPI00644146	Probable methyltransferase C20orf7, mitochondrial	C20orf7	1	1	3.5	38.918	345	8.696e-08
IPI00001287;IPI00514321;IPI00514791	Uncharacterized protein C20orf72	C20orf72	5	5	20.9	39.42	344	4.8062e-23	0.471453	0.504515		1.07496	0.460617		0.717772	0.86783	1.21963
IPI00790553;IPI00872953;IPI00552470;IPI00455174	250 kDa substrate of Akt	C20orf74	4	3	2.5	210.77	1873	0.0013426				6.08384
IPI00024913;IPI00793677;IPI00798025;IPI00218482	ES1 protein homolog, mitochondrial	C21orf33	13	2	57.8	28.17	268	1.1665e-196	1.54245	1.20801	2.26583	2.23839	2.14555	2.75961	0.49215	0.686295	0.934317
IPI00793717;IPI00025710;IPI00926044;IPI00794421;IPI00658069;IPI00289348;IPI00658020	Uncharacterized protein C21orf59	C21orf59	2	2	10.4	33.947	297	5.4188e-06	2.64333			0.704573
IPI00027898;IPI00217294;IPI00789749;IPI00787945	Uncharacterized protein C21orf70	C21orf70	2	2	9.6	25.456	230	5.4712e-06	2.14326		0.857412	1.19077			1.20486		0.489261
IPI00550689;IPI00910144;IPI00909218;IPI00910259;IPI00893551;IPI00893767	UPF0027 protein C22orf28	C22orf28	26	26	54.5	55.21	505	0	1.35661	1.29608	1.39982	0.986193	0.945626	1.08395	0.943485	0.962186	1.01887
IPI00916131;IPI00935804;IPI00447419;IPI00514470;IPI00937891;IPI00003827;IPI00643648;IPI00852651;IPI00643747;IPI00217178;IPI00854670;IPI00939581;IPI00878429;IPI00915963	Chromosome 22 open reading frame 30	C22orf30	9	9	16.6	65.359	579	3.4406e-19	1.15919	0.948677	1.03551	0.795418	0.78125	0.778634		1.00518	0.712301
IPI00748099;IPI00549947;IPI00216917;IPI00791563;IPI00889780	Uncharacterized protein C22orf9.	C22orf9	2	2	4.8	52.951	475	7.3687e-05									4.32115
IPI00791103;IPI00394781	C2 domain-containing protein 2-like	C2CD2L	3	3	6.9	76.18	706	8.538e-12						2.99159
IPI00550440;IPI00908962;IPI00909361;IPI00892923	Transmembrane protein C2orf18	C2orf18	2	2	7	40.214	371	5.569e-50						0.729022	0.743716		1.38644
IPI00014194;IPI00916080	Uncharacterized protein C2orf29	C2orf29	5	5	13.3	55.215	510	2.6668e-69	1.30608		1.31738			1.91942	0.966557		2.97761
IPI00748151;IPI00894202;IPI00432337;IPI00893828	XTP3-transactivated gene B protein	C2orf30	10	10	31.9	54.858	483	2.6624e-64	0.822639	0.719321	0.930579	1.0239	1.09724	1.08866	0.636132	0.67861	1.02412
IPI00658115;IPI00030257;IPI00894390;IPI00894042;IPI00939758	Putative uncharacterized protein C2orf43	C2orf43	2	2	5.9	42.668	370	0.00012526			1.34773			2.23045
IPI00291751;IPI00927477	Uncharacterized protein C2orf47, mitochondrial	C2orf47	5	5	18.9	32.544	291	5.0227e-43	0.561829		0.633673			1.3681	0.53087	0.540365
IPI00782980;IPI00903297;IPI00847713;IPI00016347	Uncharacterized protein C2orf54	C2orf54	1	1	2.7	49.564	447	0.0026662
IPI00410436;IPI00872271;IPI00917275	Uncharacterized protein C2orf55	C2orf55	2	2	2.8	102.16	962	0.0032877
IPI00412670;IPI00910109;IPI00892645;IPI00375685;IPI00892526;IPI00894307;IPI00893170;IPI00942916	Protein midA homolog, mitochondrial	C2orf56	2	2	4.8	49.237	441	0.0010652								1.03478
IPI00046682;IPI00917539	UPF0538 protein C2orf76	C2orf76	2	2	13.5	14.623	126	4.3665e-08	0.42084	0.357654			0.605473		0.563412	0.605987
IPI00739770;IPI00916566	Uncharacterized protein C2orf77	C2orf77	1	1	1.8	66.402	552	0.012569
IPI00430803	Uncharacterized protein C2orf79	C2orf79	7	7	65	15.805	140	9.393e-79	0.607054	0.595806	0.707314		0.507666		0.756544	0.758898	0.992063
IPI00783987;IPI00887739;IPI00942927	Complement C3	C3	13	5	9.3	187.15	1663	6.9975e-76	24.3149						40.0416
IPI00299387;IPI00791540;IPI00789388;IPI00789905;IPI00788861	Transmembrane protein C3orf1	C3orf1	9	9	38.6	32.177	285	3.9284e-62	2.49439	3.17783	1.35307	1.09152	2.94204		1.32092	1.97379
IPI00844425;IPI00935838;IPI00000296;IPI00740180;IPI00787135;IPI00885135;IPI00884134;IPI00885184	Probable protein BRICK1	C3orf10	7	7	53.8	12.046	106	2.7105e-44	1.03222	2.06701	1.11355	0.525486		0.426112	1.31184	0.914829	0.705069
IPI00295519;IPI00470909;IPI00940289;IPI00607570;IPI00744149;IPI00876914;IPI00908539;IPI00790034	Uncharacterized protein C3orf17	C3orf17	1	1	1.9	64.551	567	0.00012968							0.430089
IPI00187003;IPI00925917	Uncharacterized protein C3orf19	C3orf19	2	2	5.3	56.475	491	0.00036625
IPI00171410;IPI00927901;IPI00165665;IPI00168035;IPI00794638;IPI00910604;IPI00924870	Uncharacterized protein C3orf21	C3orf21	6	6	20.1	43.806	393	5.8799e-54		0.30349			0.329348	0.245513	0.257805
IPI00031679;IPI00795094	Uncharacterized protein C3orf26	C3orf26	3	3	10.4	31.884	279	7.597e-30	1.87871	1.24177	1.42509	0.76063	0.435977		3.52721		0.40808
IPI00925803;IPI00925977;IPI00060287;IPI00795640;IPI00789717;IPI00908721;IPI00926705	cDNA FLJ60579	C3orf31	4	4	11.3	51.066	452	7.5749e-42	0.293195	0.289889				0.899281	0.485484	0.468121	1.11697
IPI00024618;IPI00910667	UPF0361 protein DC12	C3orf37	8	8	28	40.574	354	2.2163e-59	0.509632	0.653253	0.537953		0.202585	0.157968	0.422386	0.432732	0.327708
IPI00152311;IPI00743655;IPI00908825	Uncharacterized protein C3orf38	C3orf38	2	2	9.4	37.54	329	3.5512e-08
IPI00168631;IPI00796391	UPF0672 protein C3orf58	C3orf58	2	2	5.8	49.481	430	0.00043611			1.09949
IPI00217748;IPI00872169	Uncharacterized protein C3orf59	C3orf59	4	4	8.4	55.8	491	2.3376e-40		0.460363
IPI00790098;IPI00796104;IPI00793355;IPI00745978	Uncharacterized protein C3orf63	C3orf63	6	6	3.5	189.03	1670	1.2201e-05			1.2744			0.695169			0.880592
IPI00783226	Uncharacterized protein C3orf72	C3orf72	1	1	9.7	18.625	175	0.04106
IPI00385928	Uncharacterized protein C4orf14	C4orf14	5	5	10	78.457	698	5.8256e-82	0.738062	0.662076		0.790764	0.733622	0.830289			0.354195
IPI00016532;IPI00871134	UPF0609 protein C4orf27	C4orf27	6	6	22.5	39.408	346	1.4152e-28	0.811491	0.87804	0.744602	0.77815		0.740631	0.597586	0.735998	0.441716
IPI00103259;IPI00872615	Uncharacterized protein C4orf3	C4orf3	2	2	13.6	22.53	199	0.001639					33.5751
IPI00167492;IPI00845237	Uncharacterized protein C4orf32	C4orf32	3	3	31.8	14.725	132	0.0004992	0.461617	0.370755	3.67647	1.2597	1.08965		0.782228	1.15788
IPI00396048;IPI00375684;IPI00940935;IPI00412941	UPF0636 protein C4orf41	C4orf41	6	6	6.4	128.88	1133	7.4315e-10		0.775494					1.53532		2.25078
IPI00019962;IPI00922035	UPF0534 protein C4orf43	C4orf43	4	4	26.1	23.864	203	3.2738e-39	0.426967	0.665425	0.475263		0.992654	0.724113		0.305642	0.255323
IPI00019966;IPI00867737;IPI00910695;IPI00168444	UPF0489 protein C5orf22	C5orf22	5	5	20.4	49.967	442	2.2612e-68	1.50112	1.44369	1.4454	1.36489	1.49058	2.08551	0.553067	0.367296	0.319693
IPI00845432;IPI00431405;IPI00922892;IPI00654793	UPF0465 protein C5orf33	C5orf33	12	12	33	49.432	442	4.7127e-36		0.898553	1.0998	6.92857	4.51162	6.84603	0.690084	0.917684	1.95282
IPI00847958;IPI00872709;IPI00848035;IPI00884972;IPI00885084;IPI00742890	UPF0533 protein C5orf44	C5orf44	3	3	13.1	45.934	411	0.0050976
IPI00374272;IPI00895898	UPF0600 protein C5orf51	C5orf51	4	4	20.1	33.62	294	1.4179e-19			0.741235			1.06258			0.882301
IPI00013269;IPI00642125	Uncharacterized protein C6orf106	C6orf106	1	1	5.4	32.871	298	0.0083964
IPI00855846;IPI00514113;REV_IPI00878824	UPF0727 protein C6orf115	C6orf115	7	7	81.5	9.0564	81	2.287e-122	0.591891	0.621311	0.755572	0.464296	0.408847	0.412712	0.36324	0.372523	0.425459
IPI00939281	UPF0669 protein C6orf120	C6orf120	1	1	11	20.772	191	1.4216e-13
IPI00031617;IPI00514293	Uncharacterized protein C6orf125	C6orf125	5	5	38.1	14.875	126	1.8595e-44	0.891266		1.3997	2.17903	1.86755	2.42677	0.616713		0.719321
IPI00184871	Uncharacterized protein C6orf130	C6orf130	4	4	25.7	17.025	152	7.2657e-23	0.540161	0.676041	0.933445	1.1007	0.30499				0.602228
IPI00896427;IPI00479734	Uncharacterized protein C6orf132	C6orf132	7	7	9.5	124.09	1188	9.7655e-21	0.291155		0.904159	1.278	2.21435	1.17251	1.63519		0.60746
IPI00298007;IPI00853050;IPI00607846	Uncharacterized protein C6orf150	C6orf150	5	5	11.9	58.814	522	5.2993e-08	0.419305		0.278583	0.32417		0.0651169		1.46931	0.0625978
IPI00394816;IPI00807526	Uncharacterized protein C6orf167	C6orf167	1	1	1.7	142.37	1243	3.3061e-07
IPI00915263;IPI00747200	Uncharacterized protein C6orf203	C6orf203	2	2	10.2	28.457	245	5.5933e-28				1.09662
IPI00002270	UPF0364 protein C6orf211	C6orf211	20	20	45.8	51.172	441	2.0813e-264	0.157788	0.207771	0.151286	0.372273	0.261192	0.32001	0.240258	0.279634	0.283022
IPI00019560	Uncharacterized protein C6orf64	C6orf64	1	1	11.5	20.163	183	0.0045393
IPI00465226;IPI00477187;IPI00641641	Uncharacterized protein C6orf89	C6orf89	5	5	22	40.734	354	2.2218e-15		0.355076						0.187227	0.170213
IPI00419575;IPI00657959;IPI00893923;IPI00894419;IPI00894139;IPI00893782	UPF0363 protein C7orf20	C7orf20	5	5	18.6	36.603	328	8.1592e-75	0.664275	0.591051	0.617856	0.555864	1.25683	0.892777	0.537201	0.436395	0.529914
IPI00043294;IPI00031632	Uncharacterized protein C7orf26	C7orf26	1	1	3.1	50.046	449	0.0064266
IPI00658145;IPI00172590;IPI00797616;IPI00798399;IPI00893866	HEAT repeat-containing protein C7orf27	C7orf27	14	12	23.6	88.118	821	1.7211e-162	0.438982	0.699252	0.346296	0.687332	0.875964	0.298882	0.66024	0.465484	0.166295
IPI00477526	UPF0550 protein C7orf28	C7orf28A	9	5	21.7	56.196	483	5.0424e-81	0.459327	0.527343	0.426949	0.455705	0.466984		0.911743	0.472277	0.6054
IPI00061492	Uncharacterized protein C7orf30	C7orf30	1	1	9	26.17	234	0.0045393
IPI00414548;IPI00924471;IPI00924993	Uncharacterized protein C7orf44	C7orf44	1	1	9.6	16.694	146	0.0091633
IPI00031651;IPI00892559;IPI00892533	Uncharacterized protein C7orf50	C7orf50	5	5	35.6	22.083	194	1.0174e-79	0.163036	0.170619	0.146578	0.73303	0.441833	0.544218	0.408463		0.323771
IPI00418174	UPF0562 protein C7orf55	C7orf55	3	1	30.1	12.749	113	5.4494e-34
IPI00374364;IPI00924667;IPI00925110	UPF0539 protein C7orf59	C7orf59	3	3	11.9	22.261	202	6.5096e-06		0.986875	0.337895	0.864454		0.81626	0.680828		1.23297
IPI00013445	Uncharacterized protein C7orf70	C7orf70	1	1	16.2	7.7272	68	0.0047897
IPI00867735;IPI00011997;IPI00797466	UPF0488 protein C8orf33	C8orf33	2	2	14	26.448	242	1.0102e-81	0.665557	0.856971			0.929109		0.83949
IPI00852983;IPI00847930;IPI00167088;IPI00909221	UPF0551 protein C8orf38, mitochondrial	C8orf38	4	4	13.2	38.176	333	9.9157e-08	0.726903		0.888731		3.46045	3.53619			0.669613
IPI00306207;IPI00796624	Uncharacterized protein C8orf41	C8orf41	3	3	8.3	56.914	508	1.6158e-08			1.29643						1.21467
IPI00295855	Uncharacterized protein C8orf47	C8orf47	1	1	2.4	39.935	374	0.0012138
IPI00167940	Putative uncharacterized protein C8orf54	C8orf54	1	1	8.7	15.156	138	0.0090041
IPI00171421;IPI00791754	UPF0670 protein C8orf55	C8orf55	13	13	58.7	23.865	208	2.3143e-93	0.701459	0.591401	0.820951	3.57488	2.85625	2.55892	0.183864	0.292612	0.190295
IPI00166638;IPI00879142;IPI00430781	UPF0598 protein C8orf82	C8orf82	7	7	35.6	23.889	216	2.0162e-63	0.478606	0.384408	0.637836	1.42383	0.750413	1.70454	0.259134	0.372342	0.518753
IPI00418496;IPI00513818;IPI00853478	Probable gluconokinase	C9orf103	2	2	16	20.578	187	9.8327e-17
IPI00844014;IPI00418229	Uncharacterized protein C9orf114	C9orf114	5	5	19.9	42.008	376	3.9064e-31	0.455477	0.539316	0.601504	1.59951	0.406769				0.219356
IPI00477089;IPI00843811	Transmembrane protein C9orf123	C9orf123	3	3	32.8	12.257	116	2.2869e-70	2.01054	2.7274		3.47512	14.1898			4.60193
IPI00328702;IPI00935361	Protein C9orf140	C9orf140	2	2	4.8	42.636	394	6.177e-05						0.805542
IPI00030968	Uncharacterized protein C9orf142	C9orf142	7	7	34.3	21.639	204	8.9133e-52			1.10466	1.95944	2.58846	3.09291	0.608643	2.27599	0.72223
IPI00783904	UPF0574 protein C9orf169	C9orf169	1	1	5.4	19.663	184	0.012569		0.189011	0.0665026		2.80702		0.192909
IPI00166873	Alba-like protein C9orf23	C9orf23	1	1	5.5	17.631	163	0.00013843		0.55063	0.479501		0.443833	0.488735	0.615688	0.622587	0.668717
IPI00017504	Uncharacterized protein C9orf40	C9orf40	2	2	12.4	21.063	194	9.2965e-06									0.615801
IPI00307547	Transmembrane protein C9orf46	C9orf46	3	3	21.1	17.201	147	2.0585e-05			1.45934			5.05587			3.14238
IPI00607576;IPI00012429;IPI00607692;IPI00607726	Transmembrane protein C9orf5	C9orf5	4	4	4.1	100.94	911	1.3993e-35	0.970309	0.889917	1.37709	1.29983	0.891266		0.594919	0.291189
IPI00016408;IPI00552472	UPF0436 protein C9orf6	C9orf6	1	1	9.4	20.378	181	2.4685e-31
IPI00170972;IPI00647890;IPI00643582	UPF0553 protein C9orf64	C9orf64	13	13	39.3	39.028	341	4.402e-82	0.46292	0.51164	0.583431	0.602991	0.180018	0.202519	0.295639	0.150755	0.138875
IPI00890798;IPI00168383	Uncharacterized protein C9orf75	C9orf75	2	2	4.2	75.555	711	5.6845e-25
IPI00550191;IPI00433576;IPI00844166	Uncharacterized protein C9orf78	C9orf78	3	3	16.3	33.688	289	4.675e-34	1.66417	1.25527	0.686766	0.453906	0.794029				0.216807
IPI00000330;IPI00645651;IPI00829819	Uncharacterized protein C9orf80	C9orf80	2	2	26	11.425	104	3.226e-07			0.499326		1.25034	0.754489			0.291937
IPI00647286;IPI00456750;IPI00917117	C9orf88 variant protein	C9orf88 variant protein	33	33	51.1	84.137	746	0	1.24749	1.06471	1.10667	0.876885	1.02503	1.02138	2.00224	2.42418	1.83699
IPI00336153;IPI00177808	Bcl10-interacting CARD protein	C9orf89	3	3	14	25.589	228	1.4549e-07	0.89214		1.25736	0.737246		0.75171			0.969744
IPI00465147;IPI00642317	Uncharacterized protein C9orf97	C9orf97	2	2	6	58.262	516	0.00087784
IPI00012895;IPI00221392;IPI00903233	Carbonic anhydrase 12	CA12	5	5	19.2	39.45	354	3.6895e-135	0.0880282	0.839772		1.18886	1.15623	0.814266	0.672405		0.851136
IPI00218414;IPI00790885	Carbonic anhydrase 2	CA2	17	17	67.7	29.246	260	6.3918e-296	119.316	76.0572	54.1038	3.42067			28.4673	65.9326	49.9975
IPI00219669;IPI00795677	Carbonic anhydrase-related protein	CA8	10	10	47.6	32.973	290	9.6379e-166	5.33248	34.3548	17.7854		5.28933	10.6111
IPI00032561	Calcium-binding protein 39	CAB39	14	13	34.6	39.869	341	6.3274e-65	1.9314	1.20433	1.51183	1.10316	1.36526	1.09505	2.42554	1.95622	1.6122
IPI00026359;IPI00514062;IPI00844534;IPI00916547;IPI00917474;IPI00916672	Calcium-binding protein 39-like	CAB39L	9	8	27.9	39.087	337	2.1677e-38				3.82629	1.86539	5.13611	0.249619	0.518834
IPI00176469;IPI00644715;IPI00641178;IPI00645029;IPI00909384;IPI00909535	Chaperone activity of bc1 complex-like, mitochondrial	CABC1	11	11	21	71.949	647	2.8209e-142		0.639672	1.83483	14.0031	7.88022	13.3312
IPI00291427;IPI00178886	CDK5 and ABL1 enzyme substrate 1	CABLES1	1	1	2.7	67.598	633	0.0011485
IPI00395627;IPI00552308;IPI00940004;IPI00894008;IPI00410678;IPI00893250	Calcyclin-binding protein	CACYBP	26	25	78.9	26.21	228	0	1.12118	0.783699	1.0675	1.29094	1.37497	1.52054	0.713929	0.651381	0.816393
IPI00301263;IPI00893035;IPI00893143;IPI00893407;IPI00894050	CAD protein	CAD	74	73	44.1	242.98	2225	0	0.475692	0.470921	0.613648	0.413411	0.281587	0.377701	0.598552	0.612783	0.821355
IPI00747400;IPI00297412;IPI00374128;IPI00384808;IPI00796713	Calcium-dependent secretion activator 1	CADPS	3	1	2.9	153.45	1358	0.0022081
IPI00873837;IPI00550275;IPI00384264;IPI00328826	Calcium-dependent secretion activator 2	CADPS2	20	14	21.4	143.49	1255	9.6312e-75	0.347367			6.42096	12.0273	9.30752
IPI00220361	Calbindin	CALB1	2	1	10	30.025	261	6.5267e-07			18.9387
IPI00027264;IPI00413067;IPI00185574	Calretinin	CALB2	7	6	23.6	31.54	271	1.14e-14		50.6124	15.4342
IPI00910883;IPI00743360;IPI00908968;IPI00797191;IPI00794330	cDNA FLJ51790, highly similar to Homo sapiens nuclear domain 10 protein (NDP52), mRNA	CALCOCO2	10	10	21.5	55.188	470	2.3794e-70	0.889601			13.9243	16.0717	15.6669	1.01553		1.07082
IPI00333771;IPI00816770;IPI00218695;IPI00218696;IPI00807611	Caldesmon	CALD1	37	2	58.1	61.212	532	1.1582e-282	19.104	12.0699	27.5528	6.17627	1.55075	5.61041	25.1718	25.744	6.99937
IPI00916768;IPI00075248;IPI00794543;IPI00916600;IPI00386621;IPI00915959;IPI00219796;IPI00646205	Calmodulin	CALM1	17	14	74.3	20.762	187	0	1.30692	1.34793	1.91131	0.634075	1.59286	0.722387	1.16102	0.822368	1.41828
IPI00216984	Calmodulin-like protein 3	CALML3	13	10	80.5	16.891	149	1.9101e-81							19.9581	104.597	10.5505
IPI00021536	Calmodulin-like protein 5	CALML5	16	16	95.2	15.892	146	7.6368e-267		1.46509	9.23532	5.74086	104.5	60.8273	0.617475	0.652869	0.648172
IPI00020599	Calreticulin	CALR	32	28	77	48.141	417	0	1.05264	0.975515	1.07046	0.949487	1.41089	1.15215	1.31903	1.40013	1.68031
IPI00789155;IPI00941900	Calumenin, isoform CRA_c	CALU	27	6	72.4	38.05	323	0	2.19438	1.98894	2.39286	1.3341	1.3681	1.57925	1.46045	1.52544	2.29727
IPI00045396	Calumenin	CALU	23	2	65.7	37.134	315	0	2.8962	2.14032					1.68033
IPI00028296;IPI00927594;IPI00927354	Calcium/calmodulin-dependent protein kinase type 1	CAMK1	4	2	11.1	41.337	370	3.9578e-05
IPI00170508;IPI00170675;IPI00555769	Calcium/calmodulin-dependent protein kinase type 1D	CAMK1D	8	6	23.4	42.913	385	3.3068e-22	2.2804	1.75991	2.04645	0.54615	0.514695				0.318664
IPI00828081;IPI00828178;IPI00827717;IPI00430291;IPI00827625;IPI00828139;IPI00827573;IPI00915441;IPI00827606;IPI00876923;IPI00172636;IPI00654569;IPI00939804;IPI00215715;IPI00550056;IPI00877169;IPI00925128;IPI00925318	Calcium/calmodulin-dependent protein kinase type II delta chain	CAMK2D	12	8	35.3	58.343	518	1.3074e-232	1.35905	0.825491	1.77226	2.26285	2.78792	2.7954	1.0295	1.21356	2.45182
IPI00908444;IPI00334344;IPI00915383;IPI00915327;IPI00915393;IPI00915309;IPI00172450;IPI00296678;IPI00556423;IPI00646849;IPI00640362;IPI00172452;IPI00336118;IPI00216378;IPI00903230	Calcium/calmodulin-dependent protein kinase type II gamma chain	CAMK2G	10	4	29.1	65.241	588	1.1397e-213	1.37743	1.3178	1.49873	1.24408	2.54421	1.78225	1.0219	0.989218	1.42096
IPI00025729	Calcium signal-modulating cyclophilin ligand	CAMLG	2	2	7.1	32.952	296	0.001871									0.742832
IPI00884928;IPI00395444;IPI00647751	Calmodulin-regulated spectrin-associated protein 1	CAMSAP1	10	10	9.4	179.34	1613	3.1565e-147	0.553741	0.471943	0.728173	0.463757	0.450836		0.603573	0.511012	0.696088
IPI00409607;IPI00893859;IPI00640562;IPI00514883	Calmodulin-regulated spectrin-associated protein 1-like protein 1	CAMSAP1L1	9	9	7.7	168.03	1489	1.8954e-83	0.814531	0.474721		0.717721			3.34784	3.39374	3.59777
IPI00100160;IPI00604431;IPI00915424;IPI00791537;IPI00374208;IPI00926727;IPI00925352;IPI00792154	Cullin-associated NEDD8-dissociated protein 1	CAND1	69	69	60.5	136.37	1230	0	3.97709	2.85968	3.91221	0.939408	0.735456	0.962742	0.782044	0.917684	1.02021
IPI00103175;IPI00909245;IPI00413533	Soluble calcium-activated nucleotidase 1	CANT1	7	7	17.5	44.839	401	2.948e-24	0.888257	1.09204	1.21703		6.49224	2.95465	0.581734
IPI00020984;IPI00941747;IPI00477719;IPI00442866;IPI00383227;IPI00024776	cDNA FLJ55574, highly similar to Calnexin	CANX	45	45	58.9	71.502	627	0	1.83837	1.26191	1.94772	1.79154	1.82906	1.65615	0.632631	0.629644	0.745045
IPI00008274;IPI00646869;IPI00644589;IPI00641881;IPI00647351;IPI00644109;IPI00646269;IPI00642414;IPI00514858;IPI00643567	Adenylyl cyclase-associated protein 1	CAP1	41	1	72.6	51.855	475	0	3.427	2.94473	4.21141	2.7374	3.61402	3.01051	7.13267	7.20721	8.01025
IPI00639931;IPI00939159;IPI00645789	Adenylyl cyclase-associated protein 1	CAP1	41	1	72.6	51.784	474	0
IPI00027342;IPI00552929;IPI00922569;IPI00922216;IPI00922040	Adenylyl cyclase-associated protein 2	CAP2	7	5	20.3	52.823	477	2.4303e-71	0.667156	0.511221						0.274205
IPI00027341;IPI00917562;IPI00917178	Macrophage-capping protein	CAPG	16	1	55.2	38.517	348	0	2.34637	1.83753	1.9263	0.184057	0.189707	0.0734754	3.24496	5.29998	5.03575
IPI00848090;IPI00908511;IPI00916783	cDNA, FLJ94534, highly similar to Homo sapiens capping protein (actin filament), gelsolin-like(CAPG), mRNA	CAPG	16	1	56.9	38.498	348	1.9794e-249		10.7677	10.9032
IPI00011285;IPI00910547;IPI00909108	Calpain-1 catalytic subunit	CAPN1	43	43	60.5	81.889	714	0	1.29631	0.759532	1.13604	0.678472	0.841822	0.707364	1.54789	2.21897	1.98586
IPI00289758;IPI00910745;IPI00902887;IPI00446140;IPI00376289;IPI00874238;IPI00888895	Calpain-2 catalytic subunit	CAPN2	32	32	50.7	80.008	700	0	14.1912	15.2569	27.2732	17.5942	21.6488	18.4604	38.7177	58.0114	51.5145
IPI00003765;IPI00795461;IPI00927246;IPI00925105;IPI00927915	Calpain-7	CAPN7	6	6	9.1	92.651	813	2.4015e-21	0.713369	0.689655	0.838153		0.719269	1.18548	0.583805	0.485366	0.659718
IPI00025084	Calpain small subunit 1	CAPNS1	20	17	87.3	28.315	268	0	2.2425	1.91241	2.34835	1.17229	1.40386	1.36117	2.94455	3.77672	4.07664
IPI00306986	Calpain small subunit 2	CAPNS2	4	1	11.7	27.66	248	0.0055729				0.643956
IPI00783872;IPI00873926;IPI00910763	Caprin-1	CAPRIN1	26	26	44.3	78.365	709	5.7435e-221	1.17192	1.54574	1.07058	0.885583	0.787526	0.600132	1.10492	0.954198	0.452304
IPI00005969;IPI00873484	F-actin-capping protein subunit alpha-1	CAPZA1	21	17	80.8	32.922	286	0	0.711389	0.843882	1.11833	0.816927	0.665469	0.800641	1.40833	1.70783	2.28347
IPI00026182;IPI00873113;IPI00908400;IPI00852796;IPI00853571;IPI00879381;IPI00893673	F-actin-capping protein subunit alpha-2	CAPZA2	15	11	64.3	32.949	286	0	0.865426	0.857633	1.17812	1.00782	0.746102	1.05709	1.60953	2.10097	2.54985
IPI00642256;IPI00218782;IPI00026185;IPI00646047;IPI00647677;IPI00903103	F-actin-capping protein subunit beta	CAPZB	25	25	77.2	30.628	272	0	0.695459	0.722961	1.04953	0.885818	0.579979	0.860511	1.43999	2.02298	2.56469
IPI00012213;IPI00791181	Caspase recruitment domain-containing protein 14	CARD14	3	3	3.3	113.3	1004	0.00070207				1.11201		8.61995
IPI00304409	Calcium-regulated heat stable protein 1	CARHSP1	2	2	18.4	15.892	147	6.442e-62	0.543744		0.794281	0.188271	0.279018	0.32257	0.486381	0.335087	0.537577
IPI00645172;IPI00873027;IPI00908636;IPI00909495;IPI00910136;IPI00867692;IPI00922893	Carbohydrate kinase domain-containing protein	CARKD	10	10	39.5	41.36	390	9.9193e-135	2.25169	1.67073	3.39259	3.21978	3.60933	4.55477	0.39744	0.707514	1.12096
IPI00639957;IPI00412880;IPI00514607	Coactivator-associated arginine methyltransferase 1, isoform CRA_b	CARM1	19	19	41	65.853	608	0	0.348056	0.381986	0.36899	0.529745	0.300147	0.460957	0.414233	0.599018	0.670556
IPI00549993;IPI00644407	Protein CARP	CARP	1	1	3.4	49.724	445	2.1501e-16
IPI00909763;IPI00939491	cDNA FLJ59563, highly similar to Cysteinyl-tRNA synthetase (EC 6.1.1.16)	CARS	35	1	52.6	84.277	739	0
IPI00336016;IPI00922091	Probable cysteinyl-tRNA synthetase, mitochondrial	CARS2	8	8	16	62.223	564	4.5315e-49	0.95048	1.47776	4.24719	3.38467	4.21567	5.77001	3.21864	5.03854	6.5475
IPI00289491;IPI00909543	Protein CASC3	CASC3	2	2	4	76.277	703	3.2482e-05			1.11133						0.887942
IPI00374590;IPI00940961;IPI00383014;IPI00304892;IPI00167232	cDNA FLJ53496, highly similar to Homo sapiens cancer susceptibility candidate 4 (CASC4), transcript variant 1, mRNA	CASC4	4	4	12.8	49.497	436	5.4451e-08	2.39395				6.31672
IPI00220694;IPI00170766	Protein CASC5	CASC5	1	1	0.5	265.39	2342	0.0013428
IPI00514301;IPI00555605;IPI00641315;IPI00937304;IPI00877929;IPI00646452;IPI00877806;IPI00644270	Peripheral plasma membrane protein CASK	CASK	16	16	19.2	105.12	926	1.338e-95	0.685213	0.521213	0.580046	1.01752	1.53537	0.93932	0.934667	1.85113	1.1578
IPI00103516;IPI00916548;IPI00795017;IPI00385480;IPI00651633	Caskin-2	CASKIN2	11	11	11.6	126.71	1202	7.0277e-60	1.23232		0.888099	4.40276	5.51177	3.9763			2.41838
IPI00021800;IPI00219307;IPI00797075;IPI00219308;IPI00219309;IPI00554741;IPI00909164;IPI00554551;IPI00903240;IPI00066313;IPI00219310	Caspase-1	CASP1	5	5	15.6	45.158	404	3.8775e-71							107.28	186.202	13.4163
IPI00013885	Caspase-14	CASP14	16	16	67.4	27.679	242	1.5809e-147							25.8799	283.744	38.7702
IPI00291570;IPI00216410;IPI00018345;IPI00917270	Caspase-2	CASP2	7	7	22.3	50.685	452	5.2954e-102	1.12956	1.30888	1.75226	0.706964	0.995124		1.09325	0.95813
IPI00292140;IPI00798166;IPI00553172	Caspase-3	CASP3	7	7	23.5	31.608	277	1.4802e-46	11.1117	14.3023	12.2954			0.988631		21.2148	1.7407
IPI00027725;IPI00941180;IPI00376080;IPI00910956	Caspase-4	CASP4	2	2	5	43.262	377	0.00572									20.9122
IPI00023876;IPI00217208	Caspase-6	CASP6	8	8	29.4	33.31	293	6.6579e-48	0.282542	0.327697	0.369713	0.958957	0.806647	1.16377	0.848608	0.842318	1.06185
IPI00216675;IPI00221307;IPI00910107;IPI00216674;IPI00647486;IPI00514222	Caspase-7	CASP7	6	6	21.7	37.814	336	2.7468e-36	0.709622	0.632951	0.774533		0.482975	0.466548	0.621118	0.473171	0.693241
IPI00220726;IPI00305242;IPI00000149;IPI00220721;IPI00220722;IPI00220725;IPI00073318;IPI00793235;IPI00220723;IPI00220724;IPI00927317;IPI00927151;IPI00927011;IPI00925486;IPI00925770	Caspase-8	CASP8	4	4	8.6	61.863	538	9.3144e-112	0.443361	0.423549		0.544662			0.521648	0.435218
IPI00761160;IPI00761035;IPI00305750;IPI00220857;IPI00761140;IPI00760715;IPI00761069;IPI00413492;IPI00760909;IPI00220859;IPI00921920;IPI00939354;IPI00922832	Calpastatin	CAST	31	12	50.4	84.942	791	0	2.75437	1.63428	2.88234	2.58652	3.14802	3.88606	3.9093	5.73987	7.8376
IPI00103440;IPI00328211;IPI00922420	Zinc finger protein castor homolog 1	CASZ1	2	2	1.5	190.15	1759	0.013818
IPI00465436	Catalase	CAT	29	29	56.9	59.755	527	0	1.5657	1.40168	1.94371	1.68449	2.4209	3.10385	0.694348	0.938438	0.970968
IPI00009236;IPI00876941;IPI00853146;IPI00759683;IPI00852906;IPI00790433;IPI00789601	Caveolin-1	CAV1	8	8	56.2	20.471	178	7.9605e-121	6.28378	16.8079	73.8607	1.09579			14.5586	14.5264	91.9118
IPI00019870;IPI00759514;IPI00657910;IPI00386526	Caveolin-2	CAV2	5	5	40.7	18.291	162	2.0019e-40	44.6209	74.4823	112.516						63.2831
IPI00873942;IPI00295598;IPI00872133;IPI00888290;IPI00940030;IPI00914052;IPI00909493	Putative uncharacterized protein CBARA1	CBARA1	2	2	6.3	54.55	478	9.0562e-11
IPI00016746;IPI00024871	Core-binding factor subunit beta	CBFB	8	8	32.4	21.508	182	8.0345e-83	0.944912	0.975515	1.05896	0.432115	0.238977	0.316626	1.09841	1.36571	0.973141
IPI00027269	E3 ubiquitin-protein ligase CBL	CBL	13	13	23.4	99.632	906	9.3514e-234	0.992851	0.846883	1.22145	0.270841	0.218895		0.998901	0.9802
IPI00220418;IPI00008459	Signal transduction protein CBL-C	CBLC	2	2	6.3	47.418	428	6.6367e-05
IPI00290429;IPI00927532;IPI00925925;IPI00927719	E3 ubiquitin-protein ligase Hakai	CBLL1	4	4	13.6	54.519	491	1.2092e-14				0.875274					0.517143
IPI00295386;IPI00795334;IPI00909888	Carbonyl reductase [NADPH] 1	CBR1	19	16	77.3	30.375	277	0	1.24814	1.11156	1.21492	0.48821	0.315199	0.317864	1.29119	1.54466	2.26536
IPI00290462;IPI00816567	Carbonyl reductase [NADPH] 3	CBR3	17	14	67.1	30.85	277	9.5244e-244	1.73055	1.35399	1.89728	2.11963	1.0898	1.70106	0.45253	0.362083	0.458821
IPI00384297;IPI00884980	Carbonyl reductase 4	CBR4	3	3	15.6	25.319	237	8.579e-11									2.17264
IPI00219352;IPI00219649;IPI00794609;IPI00792672;IPI00795559	Cystathionine beta-synthase	CBS	28	28	59	60.586	551	0	0.897102	0.748503	1.19228	0.417345	0.292252	0.577634	0.202368	0.240125	0.115638
IPI00305163;IPI00645209;IPI00402055;IPI00216734;IPI00472118;IPI00645737;IPI00641727;IPI00910852;IPI00748308;IPI00607791;IPI00645933;IPI00641170;IPI00647365;IPI00829871;IPI00761134;IPI00941050;IPI00922307;IPI00930190;IPI00645695;IPI00916698;IPI00887061;IPI00646395;IPI00922130;IPI00887136;IPI00930631;IPI00884935;IPI00916179;IPI00930449;IPI00916476;IPI00644727;IPI00647878;IPI00747256;IPI00930135;IPI…	COBW domain-containing protein 1	CBWD1	6	6	19.7	44.068	395	1.2501e-51	0.436072		0.440878	0.686153	0.788084	0.889996		0.500125	0.867002
IPI00878669;IPI00010320;IPI00001830;IPI00879132	Putative uncharacterized protein CBX1	CBX1	7	6	36	21.915	189	1.7556e-169		1.76463	2.02782			0.51701			0.34139
IPI00297579;IPI00917646;IPI00869133	Chromobox protein homolog 3	CBX3	10	4	45.9	20.811	183	3.9574e-191	0.859328	0.93423	0.706414	0.833611	1.04722	0.69483	0.672359	0.465354	0.275862
IPI00917509	Chromobox homolog 3 (HP1 gamma homolog, Drosophila), isoform CRA_b	CBX3	5	1	42.6	11.858	101	4.4547e-64				1.70062
IPI00024662	Chromobox protein homolog 5	CBX5	9	8	45.5	22.225	191	7.5943e-91	0.658588		0.525072		1.00316	0.446468	0.536826	0.515251	0.210424
IPI00302647;IPI00759686;IPI00183065;IPI00643860;IPI00743836;IPI00939141	Coiled-coil and C2 domain-containing protein 1A	CC2D1A	19	19	25.8	104.06	951	1.1074e-132	0.703136	0.702297	0.532	0.496081	0.639223	0.445633	0.66921	0.953107	0.720565
IPI00644671;IPI00641630;IPI00646418;IPI00306483;IPI00847574;IPI00847796	Coiled-coil and C2 domain-containing protein 1B	CC2D1B	5	4	5.2	94.223	858	1.722e-13			0.884408			2.37057		2.13443	2.69644
IPI00217357;IPI00939119	Cell division cycle and apoptosis regulator protein 1	CCAR1	19	19	18	132.82	1150	8.4829e-188	1.18554	0.880282	1.23007	1.21024	0.982994	1.35227	0.8726	1.37823	1.19789
IPI00002523;IPI00181795	Kynurenine--oxoglutarate transaminase 1	CCBL1	5	5	14.7	57.668	516	1.4848e-06									9.56206
IPI00465373;IPI00553183;IPI00647840;IPI00465006	Kynurenine--oxoglutarate transaminase 3	CCBL2	7	7	18.1	51.4	454	1.2299e-45	1.02015	0.7249	0.961076	3.3753	4.97909	4.24214	2.11564	2.95107	3.00806
IPI00061178;IPI00643486;IPI00398308;IPI00167369	RBM1	CCBL2	19	2	46.2	42.141	390	4.3527e-96									1.70803
IPI00061680;IPI00936031	SAGA-associated factor 29 homolog	CCDC101	1	1	4.4	33.238	293	2.1069e-14
IPI00059169	Coiled-coil domain-containing protein 102A	CCDC102A	3	2	4.5	62.625	550	0.0019619									2.75832
IPI00412539;IPI00171833;IPI00893132;IPI00892803;IPI00892552	Coiled-coil domain-containing protein 104	CCDC104	3	2	10.9	41.928	367	1.1491e-16					0.47288		1.02189	1.33617
IPI00171573;IPI00185975	Coiled-coil domain-containing protein 109A	CCDC109A	7	7	23.4	39.866	351	4.4535e-58		3.40298	1.88783	1.93656	6.91563	2.31916	2.31567	2.58058	1.77032
IPI00152002;IPI00916147;IPI00908697	Coiled-coil domain-containing protein 115	CCDC115	2	2	15	19.76	180	3.8038e-12			0.729288		2.28133	2.05782
IPI00925918;IPI00453463;IPI00910342;IPI00926034;IPI00925418;IPI00796947	Coiled-coil domain-containing protein 12	CCDC12	5	5	31.3	20.501	179	1.7181e-37			0.486665			1.37263	0.39992	2.55545	0.274454
IPI00060627	Coiled-coil domain-containing protein 124	CCDC124	12	12	39.9	25.835	223	7.8999e-35	1.42639	0.752162	1.32155	0.468691	0.835911	0.932053	0.837591	0.869036	0.877732
IPI00060148	Coiled-coil domain-containing protein 127	CCDC127	6	6	26.2	30.834	260	1.6122e-22			3.9265			12.8246			3.37154
IPI00553067;IPI00103148;IPI00925633;IPI00418185;IPI00924580;IPI00878945;IPI00925392;IPI00924827;IPI00925264	Coiled-coil domain-containing protein 132	CCDC132	11	11	14.1	111.17	964	6.1139e-117	0.771069	0.601178	0.747552		0.47533	0.559128	0.678196	0.773575	0.917684
IPI00302674;IPI00893350	Coiled-coil domain-containing protein 134	CCDC134	2	2	14	26.56	229	4.9314e-93		1.73738		1.23634	1.20767		0.668807	0.6259
IPI00401962	Coiled-coil domain-containing protein 137	CCDC137	2	2	10.7	33.231	289	1.1661e-111			1.02169				0.456767		0.413223
IPI00917184;IPI00301743;IPI00917884	Putative uncharacterized protein CCDC150	CCDC150	1	1	1.2	68.837	588	0.011524	23.131
IPI00550977;IPI00009702;IPI00847495	Coiled-coil domain-containing protein 21	CCDC21	3	3	4.7	85.638	762	4.7437e-33	1.92983	3.84364
IPI00022265;IPI00909940	Coiled-coil domain-containing protein 22	CCDC22	17	17	35.6	70.755	627	1.9665e-266	0.620694	0.705517	0.619579	0.961446	0.64771	0.635364	0.855652	0.818197	0.876655
IPI00396174;IPI00939326;IPI00797903;IPI00793427;IPI00791694;IPI00477220;IPI00796594	Coiled-coil domain-containing protein 25	CCDC25	7	7	37.5	24.479	208	2.4737e-84	0.489644	0.702691		0.492078	0.365604		1.31258	1.43437	1.57478
IPI00411771;IPI00217329	Putative uncharacterized protein CCDC28A	CCDC28A	1	1	4.7	30.38	274	0.00049402								0.826378
IPI00792109;IPI00329147;IPI00852696;IPI00795681	CCDC43 protein	CCDC43	5	5	21.6	25.563	227	2.5475e-89	1.65898	1.00518	1.68816	0.358564			0.773754	0.883548	1.42092
IPI00019903;IPI00791351	Coiled-coil domain-containing protein 44	CCDC44	10	10	35.7	32.477	297	6.474e-111	0.668494	0.573855	0.760109	2.03281	1.55586	2.10646	0.368813	0.401639	0.493121
IPI00385065;IPI00903246	Coiled-coil domain-containing protein 46	CCDC46	3	3	3	112.75	955	0.0032673			9.87069
IPI00024642;IPI00743775	Coiled-coil domain-containing protein 47	CCDC47	25	25	50.5	55.873	483	0	0.56443	0.548095	0.659544	1.88136	1.53475	2.12522	0.554262	0.549692	0.671141
IPI00217059;IPI00383423;IPI00798355	Coiled-coil domain-containing protein 50	CCDC50	7	7	22	56.339	482	2.0866e-34			2.4812				4.70455	4.99226	5.61956
IPI00153023;IPI00795428;IPI00791923;IPI00791372;IPI00924763;IPI00927503	Coiled-coil domain-containing protein 51	CCDC51	9	9	27	45.811	411	1.074e-70	1.0165	0.675676	1.12473	2.1815	1.71633	3.23908	0.334258	0.524027	0.959969
IPI00032848	Coiled-coil domain-containing protein 53	CCDC53	1	1	6.2	21.172	194	1.5141e-09		1.04346		1.09449			1.38468
IPI00790230;IPI00030274;IPI00796386	cDNA, FLJ94609	CCDC55	4	2	2.8	159.65	1371	0.00010773									0.616219
IPI00022277	Coiled-coil domain-containing protein 56	CCDC56	3	3	30.2	11.731	106	5.9362e-15	0.905633		1.10835		1.21459	1.49196		4.87353	1.73076
IPI00046828;IPI00787272	Coiled-coil domain-containing protein 58	CCDC58	7	7	56.9	16.62	144	6.6369e-141	0.509632	0.601106	0.609422	0.383245	0.356952	0.518888	0.49434	0.53183	0.699888
IPI00329594	Thyroid transcription factor 1-associated protein 26	CCDC59	1	1	3.7	28.669	241	0.011466			0.369508			0.67815			0.376053
IPI00000634;IPI00871951;IPI00807498;IPI00385696	Coiled-coil domain-containing protein 6	CCDC6	20	20	32.6	65.916	585	6.8522e-146	1.33592	1.20715	1.32004	1.54863	1.70826	1.66964	0.91166	0.847099	1.03535
IPI00095032;IPI00783304	Coiled-coil domain-containing protein 64B	CCDC64B	1	1	3	56.862	508	0.011456
IPI00005149;IPI00909814	tRNA guanosine-2'-O-methyltransferase TRM13 homolog	CCDC76	3	2	7.5	54.246	481	9.6295e-06	1.26632		0.89222				1.62583
IPI00479953;IPI00642738;IPI00883695	cDNA FLJ78543	CCDC76	3	2	15.4	19.703	175	0.00039595
IPI00657798;IPI00556101	Coiled-coil domain-containing protein 85C	CCDC85C	2	2	5.7	45.209	419	1.5981e-07
IPI00012199	Coiled-coil domain-containing protein 86	CCDC86	4	4	14.7	40.235	360	2.4518e-27			0.472836	0.786349	0.376421	0.851571			0.294109
IPI00171134;IPI00654603;IPI00943263;IPI00893693;IPI00893391;IPI00893288;IPI00893019;IPI00892916	Girdin	CCDC88A	8	8	4.6	216.04	1871	3.9715e-24			9.60061						13.9194
IPI00885054;IPI00884966;IPI00398837	Coiled-coil domain-containing protein 88B	CCDC88B	2	2	1.2	164.81	1476	0.0011688			0.674536
IPI00740019;IPI00029170;IPI00217770;IPI00384031	Protein Daple	CCDC88C	6	6	4.7	228.21	2028	3.3754e-20	0.681896		0.657895	1.5578	2.17751				0.106065
IPI00177642	Coiled-coil domain-containing protein 9	CCDC9	5	5	14.7	59.702	531	8.2756e-16	1.39548
IPI00152975	Coiled-coil domain-containing protein 90A, mitochondrial	CCDC90A	1	1	3.3	39.694	359	1.5141e-09
IPI00549236;IPI00854851	Coiled-coil domain-containing protein 90B, mitochondrial	CCDC90B	7	7	44.5	29.471	254	8.1343e-33			0.600565			2.0653			1.72518
IPI00154668;IPI00796758;IPI00893617	Coiled-coil domain-containing protein 93	CCDC93	8	8	13	73.197	631	2.3871e-14			0.995718				0.992851	1.1259	1.41607
IPI00061777	Coiled-coil domain-containing protein 97	CCDC97	2	2	5.2	38.946	343	4.161e-05	1.84983				0.362858
IPI00061356;IPI00910491;IPI00030845	Coiled-coil domain-containing protein 99	CCDC99	2	2	3.8	70.119	605	1.4816e-06
IPI00619952;IPI00465425;IPI00942917;IPI00922065;IPI00922135	Malcavernin	CCM2	5	5	14.6	51.412	465	5.525e-27	0.900171	1.11799			0.49985		1.26725	1.30926	1.42231
IPI00022865	Cyclin-A2	CCNA2	3	3	9.3	48.536	432	1.3316e-15	1.43856
IPI00745793;IPI00294696	G2/mitotic-specific cyclin-B1	CCNB1	6	6	20.8	48.337	433	6.6834e-58	0.838926	1.93308	0.54277			0.296507	1.23827		0.191968
IPI00028266	G2/mitotic-specific cyclin-B2	CCNB2	4	4	14.8	45.281	398	8.619e-07		3.32591	2.25571
IPI00031076;IPI00552945	Cyclin-C	CCNC	2	2	12	33.242	283	4.9589e-25		1.30634
IPI00028098;IPI00815934	G1/S-specific cyclin-D1	CCND1	8	8	33.2	33.729	295	2.6802e-36	1.27882	2.34736	3.30338			0.271356	2.40333	0.511378	0.439541
IPI00025810	G1/S-specific cyclin-D2	CCND2	3	3	13.1	33.067	289	9.583e-10
IPI00025817;IPI00843804;IPI00514180;IPI00940490;IPI00910362	G1/S-specific cyclin-D3	CCND3	1	1	4.1	32.519	292	0.001007
IPI00021305;IPI00556112	Cyclin-H	CCNH	5	5	18.6	37.643	323	4.9647e-09			0.468933	0.501228				0.658935
IPI00783214;IPI00915260;IPI00939644;IPI00431127;IPI00411579;IPI00939345	Cyclin-K	CCNK	4	4	10.5	66.136	600	1.6868e-35					1.16199		1.06526	2.31642	0.695362
IPI00654682;IPI00654772;IPI00186287	Cyclin-L1	CCNL1	2	2	4.8	59.633	526	3.6369e-20		0.589936
IPI00030247;IPI00791037	Cyclin-T1	CCNT1	8	8	17.4	80.684	726	3.2274e-109	0.598516		0.601323	0.927472	0.756086	1.16349			0.762777
IPI00030313;IPI00217564;IPI00925381;IPI00927944	Cyclin-T2	CCNT2	4	4	6.8	81.028	730	7.1523e-30		0.263241						1.64658	1.1029
IPI00465457;IPI00334743;IPI00413625	Cyclin-Y	CCNY	2	2	9.4	39.336	341	3.8424e-07			2.55787			1.45064
IPI00297235;IPI00941283;IPI00792265	Cell cycle progression protein 1	CCPG1	3	3	4.7	93.487	807	8.3509e-06									1.04332
IPI00015890;IPI00744490	Nocturnin	CCRN4L	2	2	4.9	48.195	431	0.012569
IPI00021389	Copper chaperone for superoxide dismutase	CCS	4	4	21.2	29.04	274	6.2729e-17			0.927988			0.921234	0.649899
IPI00290566;IPI00550591	T-complex protein 1 subunit alpha	CCT1	40	40	73.7	60.343	556	0	1.31149	1.24227	1.38007	1.43937	1.26714	1.55299	1.15891	1.26809	1.3897
IPI00297779;IPI00791487	T-complex protein 1 subunit beta	CCT2	47	47	85.8	57.488	535	0	1.23125	1.36095	1.24483	0.837661	0.78376	0.833125	0.834725	0.819739	0.756544
IPI00553185;IPI00290770;IPI00552715;IPI00514032;IPI00513814;IPI00513703;IPI00514218	T-complex protein 1 subunit gamma	CCT3	40	40	66.1	60.533	545	0	1.26472	1.09415	1.25633	1.48008	1.24239	1.52098	1.18326	1.1748	1.22799
IPI00302927;IPI00893358;IPI00921414	T-complex protein 1 subunit delta	CCT4	37	37	79.8	57.924	539	0	1.19837	0.965344	1.17818	0.845737	0.71449	0.892299	0.806517	0.778634	0.831532
IPI00010720;IPI00940257;IPI00909956	T-complex protein 1 subunit epsilon	CCT5	45	45	74.7	59.67	541	0	1.39435	1.44415	1.3455	1.15203	1.12147	1.16162	1.11442	1.08923	1.04707
IPI00027626;IPI00552590;IPI00220656;IPI00910226;IPI00908488	T-complex protein 1 subunit zeta	CCT6A	39	39	66.3	58.024	531	0	1.45153	1.36262	1.47241	1.48153	1.34949	1.69093	1.23276	1.20709	1.42688
IPI00018465;IPI00552072;IPI00916908	T-complex protein 1 subunit eta	CCT7	45	45	76.4	59.366	543	0	1.43102	1.1679	1.43098	1.11485	1.1054	1.19009	1.07418	1.09952	1.08599
IPI00784090;IPI00302925;IPI00797206;IPI00794673	T-complex protein 1 subunit theta	CCT8	46	46	74.1	59.62	548	0	1.21492	1.18106	1.17209	1.14517	1.12085	1.21243	1.10285	1.11987	1.09428
IPI00152540;IPI00795801;IPI00788676;IPI00795327	CD109 antigen	CD109	23	23	21.2	161.69	1445	0	26.152	14.1393	35.0091				16.8036	47.6054	17.5614
IPI00298851	CD151 antigen	CD151	4	4	16.2	28.295	253	1.1942e-09			2.7038		2.84479	1.61236	4.78309	9.74754	2.45785
IPI00793688;IPI00410488;IPI00719044;IPI00441094;IPI00019275	CD276 antigen	CD276	5	5	17.1	60.206	561	2.2979e-63	0.467946	1.15678	0.369549	0.859254	0.941797	1.28454	1.12039	1.09756	0.944644
IPI00412771	CD2-associated protein	CD2AP	24	24	41.5	71.45	639	4.8123e-162	4.43715	3.41507	4.43636	1.59686	2.11385	1.79934	1.2196	0.905305	1.06554
IPI00006103	CD2 antigen cytoplasmic tail-binding protein 2	CD2BP2	5	5	19.1	37.646	341	2.8696e-115	0.958222	1.84584	0.397093			0.386011	0.555401		0.228316
IPI00641251	CD320 antigen	CD320	1	1	3.9	28.991	282	0.001212
IPI00012788;IPI00645816	DNA-directed RNA polymerase I subunit RPA34	CD3EAP	3	3	7.2	55.171	512	6.2606e-18	1.40839	1.79096	1.78117	1.07166	0.603209	0.929541	0.716076		0.517438
IPI00305064;IPI00828117;IPI00827658;IPI00827650;IPI00418465;IPI00827795;IPI00828064;IPI00828192;IPI00828056;IPI00419219;IPI00827893;IPI00827982;IPI00827937;IPI00297160;IPI00922478;IPI00918020;IPI00827555;IPI00828108;IPI00002541	CD44 antigen	CD44	13	13	19.5	81.553	742	1.3773e-207	62.0771	58.6854	77.1843	4.48954			163.393	79.8722	79.9169
IPI00219852;IPI00332399;IPI00456644;IPI00374177;IPI00332397;IPI00332401;IPI00479283;IPI00012035;IPI00173903;IPI00374175;IPI00398353;IPI00219853;IPI00374176;IPI00398354;IPI00337661;IPI00374178	Membrane cofactor protein	CD46	3	3	9.5	44.237	399	5.3241e-23		1.15935	1.90306	2.1204	1.57652		0.56338	0.931359	0.619655
IPI00374740;IPI00216516;IPI00942115;IPI00872082;IPI00216514	Leukocyte surface antigen CD47	CD47	3	3	8.7	35.213	323	9.4437e-05	1.00251	1.10746	1.30098	0.750582	0.655136	0.429572	0.608865	0.876117	0.627038
IPI00844191;IPI00017529;IPI00942320;IPI00646548;IPI00000059	Putative uncharacterized protein CD58	CD58	2	2	10	28.161	250	6.5276e-05
IPI00011302	CD59 glycoprotein	CD59	5	5	27.3	14.177	128	1.5685e-52	1.52798	3.34582	2.98811	0.455104	1.03086	0.232029	1.35175	1.42753	3.32635
IPI00215998;IPI00749070;IPI00384548;IPI00791992;IPI00795720;IPI00795188;IPI00791162	CD63 antigen	CD63	2	2	6.7	25.636	238	1.8726e-13	0.565579	0.665425		2.69986	4.0334	2.65675	3.08157	3.45149	4.39174
IPI00657752;IPI00000190	Putative uncharacterized protein CD81	CD81	4	4	23.7	29.806	274	1.5726e-158	2.78621	1.71869	1.75725	3.09195	5.65931	2.3912	0.810241	1.10347	0.623286
IPI00215997;IPI00657796;IPI00795937;IPI00908644;IPI00556460	CD9 antigen	CD9	7	7	25.4	25.416	228	5.9762e-41	1.7325	1.18203	1.52453	2.32823	2.39429	2.15992	0.609273	1.04709	0.652061
IPI00397229;IPI00872746;IPI00397230;IPI00909812;IPI00299412	CD97 antigen	CD97	6	6	10.8	91.868	835	1.0992e-137	3.00219	3.61193	4.40025				0.623752	0.253756	0.233432
IPI00253036;IPI00642948;IPI00644034;IPI00220117	CD99 antigen	CD99	3	3	29.7	18.848	185	2.1561e-49	0.185161				0.888257		0.417763
IPI00027983	Cytidine deaminase	CDA	6	6	62.3	16.185	146	2.8702e-181							93.214	214.376	83.8364
IPI00386747;IPI00217439	Codanin-1	CDAN1	2	2	2.3	134.27	1228	3.3149e-05							0.932662
IPI00005670;IPI00514175;IPI00514360;IPI00515030;IPI00647355;IPI00641917	Cell division cycle protein 123 homolog	CDC123	7	7	23.2	39.134	336	1.5849e-33	1.33053	1.55724	1.43262	1.3088		0.701656	1.86905	1.09819	0.661901
IPI00022091;IPI00376312;IPI00376313;IPI00642377;IPI00556646	Cell division cycle protein 16 homolog	CDC16	10	10	14.4	71.655	620	4.17e-23		1.04213	1.30127	0.591856		0.707664	0.94688	1.81087	0.78235
IPI00026689;IPI00908424;IPI00165249;IPI00742856;IPI00877696;IPI00925315;IPI00044678;IPI00917390;IPI00829793;IPI00442058	Cell division control protein 2 homolog	CDC2	20	3	68.3	34.778	303	2.1547e-263	3.16967	3.82438	2.74296	1.39398	1.28455	0.967024	0.987849	0.796749	0.339685
IPI00329526;IPI00909326;IPI00382768;IPI00909999	Cell division cycle protein 20 homolog	CDC20	6	6	18	54.722	499	6.8344e-46		2.91375	3.0567				1.8943
IPI00005822;IPI00939517;IPI00019237	Cell division cycle protein 23 homolog	CDC23	9	9	17.3	68.833	597	2.2335e-65	1.05853	1.15354	1.19134	0.673355	0.56744	0.604376	0.958038	1.16038	0.767283
IPI00794278;IPI00294575;IPI00797796;IPI00909993	Cell division cycle protein 27 homolog	CDC27	9	9	13.4	92.611	830	4.9822e-47	1.42134	1.84247	1.34784		0.581362		1.75		0.856604
IPI00071189;IPI00215999;IPI00071185;IPI00376979;IPI00376983;IPI00816795;IPI00099746;IPI00642438;IPI00942449;IPI00937307;IPI00070809;IPI00219508;IPI00641338;IPI00334381;IPI00071188;IPI00395687;IPI00942877;IPI00939540;IPI00736011;IPI00337617;IPI00376980;IPI00759690;IPI00024414;IPI00024413;IPI00294006;IPI00887666;IPI00941997;IPI00942914;IPI00654724;IPI00911073;IPI00909275;IPI00937005	PITSLRE serine/threonine-protein kinase CDC2L1	CDC2L1	11	10	16.3	91.866	797	4.0671e-33	1.14925	1.35827	1.06025	0.792267	0.715512	0.868659	0.893895	0.899928	0.809913
IPI00456970;IPI00029162;IPI00165474	Cell division cycle 2-like protein kinase 5	CDC2L5	6	4	6	164.92	1512	1.9733e-13									0.615422
IPI00027120	Ubiquitin-conjugating enzyme E2 R1	CDC34	3	3	14	26.736	236	6.615e-07				0.763884					0.465896
IPI00013122	Hsp90 co-chaperone Cdc37	CDC37	26	26	50	44.468	378	1.9645e-293	0.58418	0.528933	0.616181	0.851861	0.955384	0.97561	0.700182	0.754318	0.866701
IPI00302028;IPI00646390	Hsp90 co-chaperone Cdc37-like 1	CDC37L1	3	3	16.3	38.834	337	2.454e-11	0.342841	0.416476
IPI00026307;IPI00646175	Pre-mRNA-processing factor 17	CDC40	3	3	6.6	65.521	579	1.8152e-31		1.04772	0.764117	0.953743		0.934317	0.723851	0.556979	0.401929
IPI00909484;IPI00016786;IPI00910473;IPI00007189;IPI00642590	cDNA FLJ54776, highly similar to Cell division control protein 42 homolog	CDC42	10	9	40.3	26.528	236	2.9463e-112	2.03488	1.08494	2.21921	1.21933	2.50784	1.55584	1.38746	1.46856	1.67252
IPI00903296;IPI00640957;IPI00640468;IPI00550263;IPI00654830;IPI00642165;IPI00329326;IPI00843961;IPI00872095;IPI00305254;IPI00220440;IPI00220443;IPI00555911;IPI00418464;IPI00644326;IPI00220441;IPI00220439;IPI00790469;IPI00220442;IPI00855901;IPI00215958	Serine/threonine-protein kinase MRCK alpha	CDC42BPA	24	17	15.4	202.81	1781	2.4537e-63	1.18909	2.84471	5.97158	13.5676	9.02853	10.4639		4.46588	4.363
IPI00477763	Serine/threonine-protein kinase MRCK beta	CDC42BPB	39	31	26.3	194.31	1711	4.911e-300	0.708165	0.586373	0.861549	1.57171	1.82969	1.64196	0.871384	1.08308	1.19263
IPI00454910	Serine/threonine-protein kinase MRCK gamma	CDC42BPG	15	13	12.5	172.52	1551	1.2094e-68	0.303591		0.329696	0.896781	1.20646	1.00675	0.955201	0.713165	0.44401
IPI00023605;IPI00220243;IPI00879923;IPI00877771	Cdc42 effector protein 1	CDC42EP1	7	7	26.3	40.294	391	8.1382e-303	5.24742	1.98161	4.82137	0.698324	0.673945		1.17517
IPI00294391;IPI00916280	Cdc42 effector protein 3	CDC42EP3	2	2	16.1	27.678	254	2.1247e-71
IPI00015894;IPI00902538	Cdc42 effector protein 4	CDC42EP4	2	2	8.4	37.979	356	1.7318e-28
IPI00290570	Cdc42 effector protein 5	CDC42EP5	2	2	13.5	15.207	148	0.0084508					0.67944			1.50071
IPI00024972	CDC42 small effector protein 1	CDC42SE1	1	1	15.2	8.9252	79	0.001007						1.02455
IPI00024973	CDC42 small effector protein 2	CDC42SE2	2	2	66.7	9.2234	84	5.805e-90	1.05813						1.31363	1.7962
IPI00909930;IPI00025695;IPI00878645;IPI00879106	cDNA FLJ60098, highly similar to CDC45-related protein	CDC45L	2	2	3.8	68.801	598	1.86e-22		2.74854	1.75719				0.641355
IPI00465294;IPI00909093	Cell division cycle 5-like protein	CDC5L	25	25	37.8	92.25	802	0	1.17672	1.64919	1.20849	1.03067	0.813537	0.76599	0.814399	0.541272	0.546717
IPI00300659;IPI00909174;IPI00910274	Parafibromin	CDC73	12	12	26	60.576	531	2.1103e-190	0.764468	0.871004	0.679532	0.756945	0.737735	0.679117	0.778695	0.515251	0.303702
IPI00784714;IPI00910644;IPI00604551;IPI00915839;IPI00785043	Cell division cycle-associated protein 7	CDCA7	1	1	2.4	51.444	450	0.0047813
IPI00290039;IPI00736241;IPI00235622	CUB domain-containing protein 1	CDCP1	16	16	22.1	92.901	836	2.8263e-82	40.868	64.2426	2.85788				37.7743	13.3431	11.6007
IPI00744889;IPI00025861;IPI00000513;IPI00911003	E-cadherin	CDH1	21	19	25.2	99.692	901	0	1.31122	1.21696	0.781555	0.229405	0.539345	0.0790639	1.88875	2.12789	1.2824
IPI00024046;IPI00942276;IPI00879347;IPI00879357;IPI00922186	Cadherin-13	CDH13	6	6	12.8	83.407	760	3.2198e-46									15.9523
IPI00747243;IPI00645614	Cadherin-3	CDH3	15	13	20.9	91.417	829	2.0251e-108	3.45758	4.60851	3.0512				11.6996	25.0702	6.38447
IPI00024034	Cadherin-4	CDH4	1	1	1.4	100.28	916	8.0677e-05
IPI00902843;IPI00645518;IPI00647250;IPI00910287	cDNA FLJ16129 fis, clone BRACE2039823, highly similar to CDP-diacylglycerol--inositol3-phosphatidyltransferase (EC 2.7.8.11)	CDIPT	5	5	20.7	25.946	237	1.0967e-48	0.773934	0.767283		1.21359	0.966837	0.973615	0.440781	0.500952	1.03829
IPI00031681;IPI00260318;IPI00797954;IPI00910650;IPI00023503;IPI00925562;IPI00925841	Cell division protein kinase 2	CDK2	11	9	48.3	33.929	298	1.155e-36	1.11354	0.929109	0.919709	0.510412	0.800576		0.826446	0.559315	0.477213
IPI00022340;IPI00792446;IPI00027439	Cyclin-dependent kinase 2-associated protein 1	CDK2AP1	2	2	18.3	12.365	115	2.7615e-28			0.720305
IPI00007811;IPI00790969;IPI00059926	Cell division protein kinase 4	CDK4	6	5	24.8	33.729	303	1.3214e-14	1.41697	1.46158	0.861401	0.74118	1.83722	0.51083	1.01937	1.41489	0.397836
IPI00023530;IPI00827700	Cell division protein kinase 5	CDK5	14	13	54.1	33.304	292	1.6198e-112	1.01761	0.724008	0.990589	1.05024	0.88098	1.09824	0.30792	0.339697	0.521594
IPI00329039;IPI00746700;IPI00384417;IPI00329038;IPI00479235;IPI00553062;IPI00384418	CDK5 regulatory subunit-associated protein 2	CDK5RAP2	3	2	1.5	211.36	1861	0.0053283
IPI00414442;IPI00018780;IPI00187145;IPI00792261	CDK5 regulatory subunit-associated protein 3	CDK5RAP3	20	16	36.2	59.586	531	9.6047e-113	0.944822	0.980969	1.14919	1.31223	1.42013	1.69572	0.816727	0.953834	1.21694
IPI00023529;IPI00878924;IPI00878174	Cell division protein kinase 6	CDK6	11	10	39.9	36.938	326	1.0183e-34	12.2576	6.99643	12.037				4.49115		2.58118
IPI00000685	Cell division protein kinase 7	CDK7	3	3	12.7	39.038	346	1.2002e-29			0.504999				0.905633
IPI00026791;IPI00879595	Cell division protein kinase 8	CDK8	2	2	4.7	53.283	464	0.012569							1.0553		0.709572
IPI00552413;IPI00301923	Cell division protein kinase 9	CDK9	6	4	12.1	53.365	489	1.9236e-25	0.734268	0.5124		0.909504	2.07848	0.966184	0.894374	0.646204	0.688658
IPI00015713;IPI00443485	CDK5 regulatory subunit-associated protein 1-like 1	CDKAL1	4	4	10.4	65.111	579	6.588e-45		0.835701	0.900982			0.670196	0.780092		0.356812
IPI00910937;IPI00009384;IPI00387000	cDNA FLJ54803, highly similar to Cyclin-dependent kinase inhibitor 1	CDKN1A	2	2	15.2	21.908	198	5.068e-22									1.35349
IPI00001560;IPI00942408;IPI00001563	Cyclin-dependent kinase inhibitor 2A, isoforms 1/2/3	CDKN2A	3	3	17.4	17.883	167	0.00025785
IPI00020991	CDKN2A-interacting protein	CDKN2AIP	3	3	10.2	61.124	580	7.8157e-24			1.34521	1.41283			1.27828	1.43152
IPI00063181;IPI00887796	CDKN2AIP N-terminal-like protein	CDKN2AIPNL	2	2	20.7	13.196	116	7.1535e-62			0.881679			0.6031	0.627235		0.475602
IPI00001564	Cyclin-dependent kinase 4 inhibitor C	CDKN2C	1	1	4.2	18.127	168	0.0017668
IPI00395950;IPI00935388;IPI00014984	Cerebellar degeneration-related protein 2-like	CDR2L	4	4	11.6	53.01	465	2.4488e-13			1.53998		10.4956	12.4208			3.72634
IPI00024234;IPI00908510	Phosphatidate cytidylyltransferase 1	CDS1	3	2	9.1	53.303	461	2.9129e-46			0.654022	2.51826	3.14297	0.561545	1.55562	1.76221	0.369795
IPI00032150	Phosphatidate cytidylyltransferase 2	CDS2	4	3	16.2	51.417	445	7.9795e-70	1.27252				3.79334		1.81002	2.03965	3.79579
IPI00096899	DNA replication factor Cdt1	CDT1	1	1	1.8	60.443	546	0.01427
IPI00014197;IPI00798278;IPI00795684;IPI00793920;IPI00794676;IPI00795163;IPI00479935	Protein CDV3 homolog	CDV3	14	14	72.5	27.335	258	1.1676e-261	1.73142	1.6553	2.84584	0.575705	0.310212	0.542888	0.953743	0.735565	1.92942
IPI00293963;IPI00655922;IPI00334502;IPI00942198;IPI00927254;IPI00943174;IPI00218948;IPI00181285;IPI00069208	Chromodomain Y-like protein	CDYL	3	3	8.2	66.481	598	5.3151e-06			0.772977	1.46936		1.23652			0.37237
IPI00178475	Chromodomain Y-like protein 2	CDYL2	1	1	2.2	56.5	506	5.5434e-05
IPI00935840;IPI00385428;IPI00009938;IPI00641900;IPI00644390;IPI00018920;IPI00437847;IPI00879975;IPI00012676;IPI00216039;IPI00328130;IPI00018936	Carcinoembryonic antigen-related cell adhesion molecule 1	CEACAM1	6	5	23	45.95	417	3.218e-98	33.5064	65.368	10.6349	45.9855		2.76319			0.407947
IPI00027486;IPI00880101;IPI00743702;IPI00013972	Carcinoembryonic antigen-related cell adhesion molecule 5	CEACAM5	5	3	10.4	76.795	702	2.564e-85				116.522		26.224
IPI00027412	Carcinoembryonic antigen-related cell adhesion molecule 6	CEACAM6	7	6	24.4	37.237	344	1.9267e-166				74.9344	80.8407	105.968
IPI00289773	CCAAT/enhancer-binding protein beta	CEBPB	1	1	3.8	36.105	345	0.00066987
IPI00306723;IPI00893383	CCAAT/enhancer-binding protein zeta	CEBPZ	10	10	10.4	120.99	1054	3.1542e-19			0.532396	1.28791		0.945984			0.70373
IPI00011511;IPI00299177;IPI00902875;IPI00853431	Cat eye syndrome critical region protein 5	CECR5	14	14	50.4	46.321	423	0	0.986972	0.890631	0.863036	1.70596	1.16183	1.99625	0.342783	0.471898	0.62905
IPI00099670;IPI00843810;IPI00218674;IPI00936498	Bile salt-activated lipase	CEL	1	1	2.1	79.666	756	1.0304e-21
IPI00874160;IPI00003384;IPI00220393	Putative uncharacterized protein CELSR1	CELSR1	3	3	1.3	329.43	3014	0.00026041
IPI00015346;IPI00444112;IPI00444821	Cadherin EGF LAG seven-pass G-type receptor 2	CELSR2	5	5	2.5	317.45	2923	2.5162e-16		0.280489	0.0808407	0.452632	0.46292				0.145554
IPI00304885	Centromere protein C 1	CENPC1	1	1	1	106.92	943	0.00013843
IPI00855998;IPI00908367;IPI00058949;IPI00384044	Centromere protein F	CENPF	13	13	5.3	367.76	3210	2.2243e-16	5.66476		4.81556
IPI00410143;IPI00031566;IPI00938104;IPI00893712;IPI00893348	Centromere protein M	CENPM	3	3	21.2	14.287	132	0.0010461	1.21856	0.227417							0.271209
IPI00013338;IPI00788136	Centromere protein O	CENPO	2	2	6.7	33.785	300	0.00063349			3.67715
IPI00018689	Centromere protein Q	CENPQ	1	1	5.2	30.595	268	0.0082927
IPI00465368;IPI00643513;IPI00787249	Centromere protein T	CENPT	2	2	5	60.422	561	0.00079903			1.22111
IPI00761082;IPI00376481;IPI00761119	Centromere protein V	CENPV	1	1	5.1	29.946	275	0.0064266									0.201232
IPI00657962;IPI00888387;IPI00376383;IPI00646366;IPI00645181	Centriolin	CEP110	2	2	0.7	268.88	2325	0.0032763
IPI00011933;IPI00478736	Centrosomal protein of 110 kDa	CEP110	2	1	2.1	113.42	1012	2.6132e-06
IPI00748877;IPI00171224;IPI00909859	Centrosomal protein of 120 kDa	CEP120	1	1	1	112.64	986	0.0041865
IPI00007293;IPI00876967;IPI00445310	Centrosomal protein of 164 kDa	CEP164	3	3	2.3	164.31	1460	0.0054769		0.700084			0.610203		0.508156	1.31194	0.23762
IPI00186194;IPI00871460;IPI00477477;IPI00647185;IPI00909334;IPI00550875;IPI00910412;IPI00942415;IPI00930385	Centrosomal protein of 170 kDa	CEP170	10	10	11.2	175.29	1584	9.5e-30	4.06851	2.82					6.82175	5.99269	8.00641
IPI00455675;IPI00456708	CEP192 protein	CEP192	2	2	1.3	234.52	2132	3.3611e-18								1.64804
IPI00160622;IPI00292871	Centrosome-associated protein CEP250	CEP250	1	1	0.7	281.13	2442	8.2779e-11
IPI00101532;IPI00478943;IPI00478215	Centrosomal protein of 55 kDa	CEP55	4	4	8.8	54.124	464	1.019e-05			1.22117						0.367958
IPI00154553;IPI00642360;IPI00640272;IPI00641410;IPI00641221	Centrosomal protein of 76 kDa	CEP76	2	2	5.5	74.413	659	0.0057893	2.14804
IPI00249529;IPI00640133;IPI00647080;IPI00942857	Centrosomal protein of 78 kDa	CEP78	1	1	1.7	80.073	722	0.0092317
IPI00238469;IPI00383439;IPI00910764	Centrosomal protein of 97 kDa	CEP97	2	2	3.9	99.907	891	0.013467
IPI00005775	Choline/ethanolaminephosphotransferase 1	CEPT1	3	3	8.7	46.553	416	3.8031e-21				0.894134	0.586201
IPI00295595;IPI00642813;IPI00941005	Glycosyltransferase 25 family member 3	CERCAM	1	1	2.7	67.591	595	0.0083964
IPI00332828;IPI00419920;IPI00552259;IPI00220026;IPI00026103;IPI00913969;IPI00640345;IPI00844209;IPI00411985;IPI00167706	Carboxylesterase 2	CES2	13	13	26.3	68.898	623	1.9047e-85							33.5424	194.416	35.7615
IPI00374310;IPI00640658;IPI00384687	Carboxylesterase 3	CES3	3	2	7.9	62.281	571	2.5098e-05
IPI00215928;IPI00029225	Centrin-2	CETN2	8	8	48.8	19.738	172	2.3353e-54	1.69494		0.359518			0.662208	1.11829	1.04148	0.70497
IPI00165972	Complement factor D	CFD	1	1	6.5	27.779	260	0.00070436
IPI00007306;IPI00646794	Craniofacial development protein 1	CFDP1	3	3	13.7	33.592	299	4.9738e-18	0.455622		0.350067			0.174554			0.211216
IPI00012011;IPI00909841	Cofilin-1	CFL1	30	21	96.4	18.502	166	0	1.2387	1.28536	1.31192	0.798403	0.852733	0.895576	0.995619	1.02249	1.12506
IPI00413344;IPI00893115	Cofilin-2	CFL2	16	7	82.5	18.736	166	5.4287e-230	0.773156	1.0895	1.28778	0.509554	0.15252		1.16617	1.02843	1.54433
IPI00295585;IPI00795467	CGG triplet repeat-binding protein 1	CGGBP1	3	3	22.8	18.82	167	7.5025e-07	3.4303		1.12639						0.26559
IPI00893315;IPI00893087	Putative uncharacterized protein CGI-59	CGI-59	2	1	22.9	9.4379	83	6.3917e-47	1.0292	1.31752	1.02102	1.03699	0.835282	0.655996	0.765228	0.687427	0.576402
IPI00844508;IPI00929635;IPI00852984;IPI00797763;IPI00915752;IPI00744509	Cingulin	CGN	29	27	28.1	137.06	1203	0	0.955657	0.574317	0.684838	0.945448	0.917515	0.873591	0.294803	0.132317	0.096637
IPI00892572;IPI00903089;IPI00337548	Putative uncharacterized protein CGREF1	CGREF1	4	4	14.1	47.064	440	3.9636e-56					15.6448
IPI00402280;IPI00855816	Chondroadherin-like protein	CHADL	1	1	2.8	82.387	762	8.2159e-09	0.702988	0.698959					0.753523	0.693433
IPI00023177;IPI00219364;IPI00219363	Chromatin assembly factor 1 subunit A	CHAF1A	1	1	1	106.92	956	0.012569
IPI00011857	Chromatin assembly factor 1 subunit B	CHAF1B	2	2	3.4	61.492	559	8.0483e-15			1.13462			0.430367			0.230659
IPI00060107;IPI00646310	Coiled-coil-helix-coiled-coil-helix domain-containing protein 1	CHCHD1	2	2	25.4	13.475	118	0.00024201						2.12698
IPI00007673;IPI00401259	Coiled-coil-helix-coiled-coil-helix domain-containing protein 2, mitochondrial	CHCHD2	3	2	33.8	15.512	151	1.7303e-44		10.1497	6.33794						1.91721
IPI00926903;IPI00015833;IPI00926408;IPI00927150;IPI00921826;IPI00927721	Coiled-coil-helix-coiled-coil-helix domain-containing protein 3, mitochondrial	CHCHD3	12	12	40.5	26.694	232	6.5042e-165	0.61177	1.65706	0.810833	1.33853	4.29646	1.45951	1.68401	0.944376	0.883861
IPI00177428;IPI00748354	Mitochondrial intermembrane space import and assembly protein 40	CHCHD4	4	4	31.6	17.385	155	9.941e-26					1.63215
IPI00305552;IPI00395372	Putative uncharacterized protein CHCHD5	CHCHD5	1	1	8.9	17.713	158	1.8013e-06
IPI00031622;IPI00789915;IPI00796105	Coiled-coil-helix-coiled-coil-helix domain-containing protein 6	CHCHD6	7	7	43.8	26.457	235	4.7348e-12		1.4079					6.25391	4.98231	4.82742
IPI00009817;IPI00878815	Coiled-coil-helix-coiled-coil-helix domain-containing protein 8	CHCHD8	2	2	35.4	11.308	96	1.1098e-28	0.67659		0.238192		14.298	0.513215	0.468055	0.222568	0.393701
IPI00297851	Chromodomain-helicase-DNA-binding protein 1	CHD1	9	4	5.7	196.69	1710	1.4069e-21	0.556824	0.786782	0.545703	1.33794			1.25368		0.4332
IPI00329088;IPI00890729;IPI00890749;IPI00854584;IPI00400835;IPI00909123	Chromodomain-helicase-DNA-binding protein 1-like	CHD1L	13	13	14.5	101	897	1.4314e-79	2.02577	2.4001	2.0725	0.874738	1.18241	1.87333	0.796242	1.34391	0.525541
IPI00815893;IPI00023109;IPI00942840;IPI00902738	Chromodomain-helicase-DNA-binding protein 2	CHD2	6	1	3.4	211.34	1828	1.0804e-18
IPI00465222;IPI00937706;IPI00373870;IPI00411592;IPI00910580;IPI00879443;IPI00879130	Chromodomain-helicase-DNA-binding protein 3	CHD3	17	3	9	233.03	2059	1.7853e-236			1.55502			1.08505	0.326701	0.338937	0.528039
IPI00455210;IPI00000846;IPI00445286;IPI00789340	Chromodomain-helicase-DNA-binding protein 4	CHD4	55	37	29.9	220.83	1940	0	0.988631	0.822436	0.871992	1.04104	0.980392	0.823995	0.516903	0.486027	0.337507
IPI00152535;IPI00646871;IPI00444866	Chromodomain-helicase-DNA-binding protein 5	CHD5	16	1	7.4	223.05	1954	3.7467e-177
IPI00220289;IPI00395823	Chromodomain-helicase-DNA-binding protein 6	CHD6	6	4	2.1	305.41	2715	2.2192e-08			0.259182				0.9996		0.170062
IPI00794880	Chromodomain-helicase-DNA-binding protein 7	CHD7	7	3	2	335.92	2997	2.542e-07						1.29919			5.5816
IPI00398992;IPI00719073;IPI00939742	Chromodomain-helicase-DNA-binding protein 8	CHD8	11	7	4.6	290.51	2581	1.3173e-130	1.8114	0.907359	0.863632	0.873439	0.83703	15.1178	0.45527	0.539462
IPI00383105;IPI00746795;IPI00643741;IPI00941213;IPI00914955;IPI00644723	Chromodomain-helicase-DNA-binding protein 9	CHD9	4	2	1.3	326.02	2897	8.4309e-07
IPI00168603;IPI00798298;IPI00796003;IPI00797772	Choline dehydrogenase, mitochondrial	CHDH	4	4	8.9	65.358	594	1.3686e-17	0.905961	0.559722	1.28813		0.752899	1.26107
IPI00333010;IPI00642935;IPI00383486	Calcium homeostasis endoplasmic reticulum protein	CHERP	14	14	19.7	103.57	916	3.9699e-40	1.82989	1.65328	1.29626	0.825968	0.923361	0.706314	1.04208	0.983961	0.661332
IPI00023513;IPI00930659;IPI00397548;IPI00397549;IPI00943195;IPI00796680;IPI00789996;IPI00796197	E3 ubiquitin-protein ligase CHFR	CHFR	1	1	2	73.386	664	1.6607e-08
IPI00301185;IPI00940998;IPI00306719;IPI00045536	Chitinase domain-containing protein 1	CHID1	7	7	25.8	47.615	418	3.1576e-44	0.956023	0.509009	0.879275	10.3921	5.40424	3.1741	0.337849		0.641313
IPI00409761;IPI00409762	Choline kinase alpha	CHKA	1	1	3.1	52.248	457	0.00071338
IPI00031758	Choline/ethanolamine kinase	CHKB	2	2	7.8	45.271	395	1.3998e-53			1.3935	1.99812	2.5888				1.42258
IPI00028099	Rab proteins geranylgeranyltransferase component A 1	CHM	5	5	8.9	73.475	653	2.2548e-26			3.73874						1.6122
IPI00031587	Rab proteins geranylgeranyltransferase component A 2	CHML	4	4	7.3	74.071	656	5.5144e-07			4.7567						0.789079
IPI00382452	Charged multivesicular body protein 1a	CHMP1A	4	4	17.3	21.703	196	6.3883e-10	0.913993	0.883158	0.951022			0.404875	0.773156	0.657419	0.606428
IPI00004416;IPI00647029	Charged multivesicular body protein 2a	CHMP2A	6	6	17.1	25.104	222	4.496e-08		0.548817				0.964227	1.52802
IPI00550181	Charged multivesicular body protein 2b	CHMP2B	4	2	14.6	23.906	213	6.1068e-09	1.11241	1.16473	0.944198	0.951203	0.97144	0.919118	1.18275	0.99295	0.98174
IPI00794397	Charged multivesicular body protein 4a	CHMP4A	9	4	36.6	29.803	265	8.5487e-39							0.34408
IPI00025974	Charged multivesicular body protein 4b	CHMP4B	10	10	54.5	24.95	224	3.8581e-170	1.84132	1.35424	1.71783	1.23977	1.15925	1.41311	0.983961	0.807428	1.32769
IPI00060414	Charged multivesicular body protein 4c	CHMP4C	2	2	15	26.41	233	2.481e-37
IPI00100796	Charged multivesicular body protein 5	CHMP5	6	6	32.4	24.57	219	2.6196e-21	1.46832	1.5806	1.8587	1.27894	1.7522	1.316	1.0983
IPI00305423;IPI00796868	Charged multivesicular body protein 6	CHMP6	3	3	19.4	23.485	201	6.027e-34	0.809782				1.6443	1.58378			0.960615
IPI00395463;IPI00910996;IPI00789431;IPI00797449	Charged multivesicular body protein 7	CHMP7	6	6	15.9	50.91	453	3.8584e-89	0.569736	0.555093		0.612933			0.670286	0.601902	0.825151
IPI00015897;IPI00885057;IPI00869333	Cysteine and histidine-rich domain-containing protein 1	CHORDC1	16	16	62.7	37.489	332	1.4954e-123	0.874891	0.667468	0.900171	0.76063	0.418989	0.719476	0.793399	0.577467	0.802182
IPI00218924;IPI00908436;IPI00790539	Calcium-binding protein p22	CHP	10	10	59.5	22.456	195	9.1823e-180	3.15447	3.64844	2.83014		2.58572	1.11439	2.64075	10.9378	2.61445
IPI00010158;IPI00791751	Chromatin accessibility complex protein 1	CHRAC1	4	4	36.6	14.71	131	6.4365e-180		1.43429	1.6503	0.805218		0.551724
IPI00329141;IPI00852578	Chondroitin sulfate synthase 1	CHSY1	1	1	1.4	91.783	802	0.00012968
IPI00872454;IPI00178203;IPI00414657;IPI00927525;IPI00895945;IPI00909267;IPI00922118	Chromosome transmission fidelity protein 18 homolog	CHTF18	10	10	13.7	107.38	975	5.1327e-33	0.491787	0.530335	0.463865	0.954836	0.858295	0.275467	0.493681	0.452694	0.242931
IPI00005104	Inhibitor of nuclear factor kappa-B kinase subunit alpha	CHUK	7	6	10.5	84.653	745	2.2679e-12	0.872296	0.564876	0.66778		0.844167	0.782411	0.734322		1.25935
IPI00797096;IPI00102920	Protein Churchill	CHURC1	2	1	27.7	12.887	112	2.4427e-07
IPI00008791;IPI00908614	Protein CIAO1	CIAO1	12	12	39.8	37.84	339	0	0.644496	0.705169	0.663394	0.905141	0.975895	0.918021	0.658762	0.691515	0.754205
IPI00387130;IPI00025333;IPI00908414;IPI00513770;IPI00878389	Anamorsin	CIAPIN1	9	9	36.2	33.582	312	6.5172e-61	0.880282	0.578938	0.886682	0.504236	0.55537	1.21096	1.27833	0.966931	1.45425
IPI00018451	Calcium and integrin-binding protein 1	CIB1	3	3	24.1	21.703	191	6.0012e-39			0.623636			1.96298
IPI00013263	Cyclin-dependent kinase 2-interacting protein	CINP	1	1	6.1	24.324	212	0.0084508
IPI00180954;IPI00641579;IPI00909097;IPI00646241;IPI00910502;IPI00443657	Cold-inducible RNA-binding protein	CIRBP	7	7	38.4	18.648	172	3.1589e-93	1.06658	1.09445	1.25117	1.80255	2.04616			0.360321
IPI00239815;IPI00399197;IPI00399195;IPI00641112	Cirhin	CIRH1A	7	7	13.4	76.889	686	1.0576e-29	1.47999	2.166	0.684088	0.870398		0.768876			0.579912
IPI00020510	CDGSH iron sulfur domain-containing protein 1	CISD1	5	5	48.1	12.199	108	4.9031e-15	0.732332		1.30924			1.64661	0.415455		0.707664
IPI00166865	CDGSH iron sulfur domain-containing protein 2	CISD2	7	7	47.4	15.278	135	2.2295e-140	0.357705	0.360985	0.419798	0.93668	0.454628	0.798467	0.328396	0.255148	0.356583
IPI00783359	CDGSH iron sulfur domain-containing protein 3, mitochondrial	CISD3	1	1	8.7	14.215	127	0.0013428
IPI00719285;IPI00022465;IPI00607850;IPI00793453;IPI00884041	Putative uncharacterized protein CIT	CIT	17	17	9.8	236.6	2069	5.9935e-32	2.60695	4.9586	1.8966	0.355341			1.23247	0.737735	0.360646
IPI00921819;IPI00514295;IPI00329602;IPI00386740;IPI00220051;IPI00183425;IPI00647476;IPI00551026	cDNA FLJ56007, highly similar to Cip1-interacting zinc finger protein	CIZ1	2	2	2.7	102.98	924	0.013745							1.33103		0.217562
IPI00071824;IPI00794761;IPI00896560;IPI00640794;IPI00872604	Cytoskeleton-associated protein 2	CKAP2	5	5	12.2	76.986	683	7.9925e-24	4.58022	18.5295	3.39409	1.37855
IPI00141318;IPI00939370;IPI00883950;IPI00604713;IPI00796152	Cytoskeleton-associated protein 4	CKAP4	36	36	58.8	66.022	602	0	1.95091	1.62277	2.47139	1.53969	1.82445	1.58145	2.09674	3.31565	4.58737
IPI00921422;IPI00028275;IPI00472887;IPI00749072	Cytoskeleton-associated protein 5	CKAP5	70	70	38.8	226.25	2039	0	0.952925	0.936944	1.15942	1.03295	0.81057	0.911411	1.11161	1.16038	1.34682
IPI00022977;IPI00908811	Creatine kinase B-type	CKB	16	15	52.5	42.644	381	1.0921e-251	38.0026	35.935	35.5391		18.7056	62.1079
IPI00658109;IPI00877726;IPI00878893;IPI00852728;IPI00921866;IPI00935707;IPI00797318;IPI00024638;IPI00853566;IPI00015141;IPI00922077;IPI00027487;IPI00909684;IPI00908787;IPI00908823	Creatine kinase, ubiquitous mitochondrial	CKMT1A	22	20	53.7	47.036	417	6.7347e-300	0.803019	0.539345	1.2169	5.06098	5.24494	7.54205	2.01394	3.86563	6.20424
IPI00015104;IPI00413006;IPI00514250;IPI00794756;IPI00643512	Cyclin-dependent kinases regulatory subunit 1	CKS1B	6	6	73.4	9.6601	79	4.8323e-33	3.02279	5.08984	2.31997		1.06711	0.714592	0.954654	0.536538	0.132776
IPI00015105	Cyclin-dependent kinases regulatory subunit 2	CKS2	2	2	44.3	9.8602	79	8.6237e-05			0.917936				2.41097		0.112615
IPI00396279;IPI00744551;IPI00915353;IPI00828013;IPI00926355;IPI00927744;IPI00927708;IPI00926566;IPI00927083;IPI00790508	CLIP-associating protein 1	CLASP1	20	16	16.5	169.45	1538	2.8515e-218	1.21723	1.02916	1.37357	0.639182	0.421053	0.723484	2.11582	3.04553	1.89779
IPI00925217;IPI00168165;IPI00789331;IPI00167067	CLASP2 protein	CLASP2	17	1	13.9	166.67	1520	0	1.43988	1.14826	1.6619	1.12956			1.66492	2.15202	2.08703
IPI00299094	Calcium-activated chloride channel regulator 2	CLCA2	20	20	31.8	103.94	943	9.1418e-163				30.9607	15.9068	20.1873	0.653937		1.73497
IPI00045511;IPI00396547;IPI00103757;IPI00103756;IPI00513790	Chloride channel CLIC-like protein 1	CLCC1	5	5	12.2	62.022	551	1.8805e-14	0.392619	0.313982		0.899361	1.03094		0.557103	0.603245
IPI00020524;IPI00940305;IPI00641148;IPI00796265	Chloride channel 7, isoform CRA_b	CLCN7	5	5	4.7	89.387	812	1.0575e-05		0.470854		0.839349	0.902364		0.635526	1.20795
IPI00007364	Claudin-3	CLDN3	3	3	12.3	23.318	220	4.3045e-24	0.65304	0.556328	0.627471	1.10092	1.88498
IPI00794537;IPI00294755;IPI00554813	Claudin-7	CLDN7	1	1	7.4	24.629	231	2.072e-128	1.51124
IPI00746431;IPI00072743;IPI00554568;IPI00848208;IPI00790649;IPI00744006;IPI00795658;IPI00793116	Claudin domain-containing protein 1	CLDND1	3	3	10.9	31.05	276	0.0039231							1.41385		1.30249
IPI00169441;IPI00915926;IPI00643561;IPI00917061	Protein CLEC16A	CLEC16A	3	3	2.5	117.71	1053	0.0047775	0.708918	1.09217					0.982994		1.06867
IPI00010896;IPI00877596	Chloride intracellular channel protein 1	CLIC1	18	17	87.1	26.922	241	0	2.18527	1.91725	2.53968	0.961261	0.84317	1.08879	1.47267	1.46994	2.16155
IPI00000692;IPI00644062	Chloride intracellular channel protein 3	CLIC3	21	20	81.8	26.648	236	3.2672e-167	0.16164	0.218804	0.0913159	2.04599	8.22842	2.96974	0.841468	1.17938	0.213712
IPI00001960;IPI00027193;IPI00294443;IPI00221328;IPI00514835;IPI00853014;IPI00384724	Chloride intracellular channel protein 4	CLIC4	23	4	86.6	28.772	253	0	5.4095	3.27375	7.85053	0.752729	0.461979	1.05512	4.40606	6.10054	7.5706
IPI00291930;IPI00397519;IPI00939839	Clathrin interactor 1	CLINT1	19	19	32	70.294	643	5.0523e-293	1.37571	1.35573	1.42843	1.26119	1.30247	1.51364	0.844595	0.923361	1.02425
IPI00013455;IPI00027172;IPI00217113;IPI00384485;IPI00788776;IPI00789347	CLIP1 protein	CLIP1	36	29	27	162.24	1438	1.3553e-281	1.5746	1.42698	1.55077	0.963484	0.922169	0.979144	1.42136	1.15525	1.10333
IPI00019642;IPI00246616	CAP-Gly domain-containing linker protein 2	CLIP2	7	3	7.2	115.84	1046	1.2447e-24			1.90589						17.0097
IPI00028071;IPI00643082;IPI00478691;IPI00915761;IPI00028061;IPI00180143;IPI00936499	Dual specificity protein kinase CLK2	CLK2	2	2	4.4	60.089	499	0.0064266
IPI00847415;IPI00298896;IPI00219341;IPI00902581;IPI00798255;IPI00556473	Dual specificity protein kinase CLK3	CLK3	2	2	4.4	73.514	638	9.0683e-58
IPI00411705;IPI00290764	Chronic lymphocytic leukemia deletion region gene 6 protein	CLLD6	5	5	25.5	21.666	196	1.0265e-21	0.990589	0.855945					0.906043		1.56698
IPI00101942	Calmin	CLMN	14	14	17.4	111.65	1002	3.2127e-45	6.02627	3.45352	2.57978	4.09048	15.915	4.56496	2.78606		2.28864
IPI00012448;IPI00217836;IPI00217835;IPI00384849;IPI00217837;IPI00186092;IPI00644378;IPI00639963;IPI00217838;IPI00010906;IPI00642284;IPI00383566;IPI00640605;IPI00941424;IPI00910102;IPI00010905;IPI00028312;IPI00383568;IPI00383669	Battenin	CLN3	4	4	15.3	47.622	438	3.068e-13	0.432601	0.324717	0.507177	5.20021	5.17384	4.30589		1.0695
IPI00026050	Ceroid-lipofuscinosis neuronal protein 5	CLN5	3	3	6.6	46.339	407	5.9898e-09							10.894		9.18611
IPI00016597;IPI00798061;IPI00795971;IPI00922070;IPI00910505;IPI00797404	Ceroid-lipofuscinosis neuronal protein 6	CLN6	3	3	13.8	35.919	311	4.059e-87		0.867528		0.916338	0.791703		0.496919	0.633312
IPI00003926	Protein CLN8	CLN8	1	1	8.7	32.787	286	2.132e-22
IPI00004795	Methylosome subunit pICln	CLNS1A	4	4	29.1	26.215	237	2.4977e-141	0.761963	1.20893	0.739536	0.805153	1.01283	0.760861	1.19261	1.17607	0.42294
IPI00216192;IPI00006615;IPI00910365	Caseinolytic peptidase B protein homolog	CLPB	17	16	31.6	75.448	677	3.9728e-117	0.279548	0.346536	0.345698	0.632351	0.429221	0.467115	0.32204	0.34565	0.41437
IPI00003870	Putative ATP-dependent Clp protease proteolytic subunit, mitochondrial	CLPP	7	7	27.8	30.18	277	2.3047e-93	0.408563	0.426385	0.511745	1.35175	1.11532	1.67465	0.396479	0.497512	0.579845
IPI00107357;IPI00396411	Cleft lip and palate transmembrane protein 1	CLPTM1	10	10	20.3	77.958	686	1.7149e-283	1.37093	1.55104	1.23962	1.5827	2.53171	1.2242	1.42945	0.840054	0.447347
IPI00151358;IPI00186429	Cleft lip and palate transmembrane protein 1-like protein	CLPTM1L	7	7	13.8	62.228	538	2.6611e-145	1.15635	0.905223	1.48001	2.25098	1.1484	2.33263	0.657722	0.584249	0.825423
IPI00008728	ATP-dependent Clp protease ATP-binding subunit clpX-like, mitochondrial	CLPX	18	18	40.4	69.223	633	1.5745e-167	0.870095	0.944733	0.689132	1.87	1.90862	1.38587	0.973425	1.10186	0.559472
IPI00879588;IPI00186968;IPI00748041	Claspin	CLSPN	1	1	1	151.09	1339	0.00049402
IPI00014587;IPI00790571;IPI00216393	Clathrin light chain A	CLTA	9	9	29	27.076	248	6.089e-97	0.703631	0.759994	1.14003	2.0826	2.49856	2.13817	0.806257	0.854555	1.00882
IPI00014589;IPI00216472	Clathrin light chain B	CLTB	11	11	31.9	25.19	229	1.4735e-39	0.226783	0.332347	0.443046	0.564111	0.960523	0.529045	0.739426	0.697399	1.04777
IPI00024067;IPI00455383;IPI00922104;IPI00385931	Clathrin heavy chain 1	CLTC	118	90	70.8	191.61	1675	0	0.506611	0.451406	0.621929	1.02188	0.843953	1.01771	0.753012	0.829876	1.08293
IPI00022881;IPI00300446	Clathrin heavy chain 2	CLTCL1	29	1	13.9	187.03	1640	0
IPI00400826;IPI00291262;IPI00795633;IPI00793848	Clusterin	CLU	18	18	34.1	57.832	501	4.8262e-92			0.147898	9.72101	34.9211	10.3755
IPI00303158;IPI00479958	N-acylneuraminate cytidylyltransferase	CMAS	15	15	40.1	48.379	434	1.9162e-116	0.579072	0.615915	0.66538	0.616143	0.547285	0.707264	0.613911	0.449903	0.842176
IPI00383046	Carboxymethylenebutenolidase homolog	CMBL	13	13	51.8	28.048	245	4.3027e-93				50.6098	92.3276	9.19709		30.5409	30.0752
IPI00376478;IPI00927432;IPI00794853;IPI00790595	COX assembly mitochondrial protein homolog	CMC1	4	4	27.4	12.49	106	2.2465e-10	1.08371	1.76647	1.43017			0.661638	0.974659	1.16904	1.20269
IPI00028438;IPI00413562;IPI00641967	C-Maf-inducing protein	CMIP	1	1	2.5	86.33	773	0.0088686
IPI00219953;IPI00908752;IPI00514929;IPI00514049;IPI00909419	UMP-CMP kinase	CMPK1	16	16	53.5	25.855	228	2.8374e-288	1.59742	0.920726	1.54959	1.54988	1.90647	2.00795	1.48074	1.73683	2.34797
IPI00015801	CKLF-like MARVEL transmembrane domain-containing protein 6	CMTM6	3	3	21.9	20.419	183	4.5087e-11	2.714
IPI00430812;IPI00430813;IPI00895806;IPI00430814	Cellular nucleic acid-binding protein	CNBP	10	1	56.5	19.463	177	1.9211e-141	1.04633		0.746547		1.02577	0.326286	0.921234		0.552181
IPI00895911;IPI00895852	Cellular nucleic acid binding protein alpha variant 1	CNBP	10	1	56.7	19.592	178	3.7103e-173																																					HCG1983504, isoform CRA_f	TUBB3 protein
IPI00177728;IPI00165579;IPI00386314;IPI00646632;IPI00642792;IPI00643827;IPI00642656;IPI00646185;IPI00643988;IPI00647662;IPI00641258	Cytosolic non-specific dipeptidase	CNDP2	30	30	68.6	52.878	475	0	1.76585	1.34253	2.16596	1.59193	1.99481	1.74566	0.9994	1.33811	1.40603
IPI00000115;IPI00642014	Protein cornichon homolog 4	CNIH4	1	1	14.4	16.093	139	2.7277e-17		0.933271	1.66221	10.4636	10.1191		1.87663	2.20391	3.27311
IPI00910593;IPI00015262;IPI00398735;IPI00910272;IPI00021264	cDNA FLJ52765, highly similar to Calponin-2	CNN2	19	17	60.6	35.943	330	0	4.94756	4.80031	4.79616	1.32839	1.39591	1.5106	14.2515	16.5566	8.61549
IPI00216682;IPI00909623;IPI00642542	Calponin-3	CNN3	13	11	45.3	36.413	329	8.219e-223	52.8625	125.664	13.6495			61.4213	113.419	16.1878	28.4568
IPI00168565;IPI00641658;IPI00386115	Metal transporter CNNM3	CNNM3	2	2	4.1	76.118	707	6.0856e-08			2.83326
IPI00418426;IPI00922084	Metal transporter CNNM4	CNNM4	3	3	4.8	86.606	775	2.9096e-05								0.254758
IPI00166010;IPI00880052;IPI00642900;IPI00410157;IPI00032299	CCR4-NOT transcription complex subunit 1	CNOT1	50	50	26.9	266.94	2376	0	1.39803	1.00941	1.27204	1.07341	0.942951	1.18321	0.849185	0.979144	0.990786
IPI00790411;IPI00878368;IPI00396314;IPI00794753;IPI00925558;IPI00926913;IPI00791933;IPI00922596	CCR4-NOT transcription complex subunit 10	CNOT10	5	5	7.7	89.142	804	5.9519e-67	1.36683	1.14069		1.19153	0.926526	2.54304	0.967961	0.995818	0.256977
IPI00005011;IPI00789121;IPI00017733;IPI00410623;IPI00410621;IPI00410622;IPI00794346;IPI00796557;IPI00795025	CCR4-NOT transcription complex subunit 2	CNOT2	7	7	24.8	59.737	540	1.3827e-83	1.66511	1.30541		1.22971	1.1399		0.962279	1.09958
IPI00005015;IPI00478453;IPI00186188;IPI00892654;IPI00892783;IPI00892660	CCR4-NOT transcription complex subunit 3	CNOT3	10	10	16.6	81.871	753	1.7777e-134	1.31693	1.34755	1.38591	0.873134	0.91166	1.02312	0.814332	0.906208	1.0199
IPI00410685;IPI00410684;IPI00925697;IPI00410686;IPI00410681;IPI00410682;IPI00410683;IPI00002436;IPI00902957	CCR4-NOT transcription complex subunit 4	CNOT4	5	5	11	84.746	767	2.2979e-37	0.906618	1.29966		1.0326				0.491449
IPI00164061;IPI00008205;IPI00878418;IPI00910740;IPI00455253	CCR4-NOT transcription complex subunit 6-like	CNOT6L	4	4	8.6	63.001	555	2.3556e-23	0.654579		0.125884		0.855139	0.891186	0.544722	0.825083
IPI00006552;IPI00395777;IPI00791840;IPI00796191	CCR4-NOT transcription complex subunit 7	CNOT7	6	5	34.7	32.745	285	1.8425e-109	0.880127	0.837381	0.82672	1.05028	0.851716	1.11508	0.931099	1.04978	0.983478
IPI00295501	CCR4-NOT transcription complex subunit 8	CNOT8	2	1	8.2	33.54	292	0.0047132
IPI00306667;IPI00220993	2',3'-cyclic-nucleotide 3'-phosphodiesterase	CNP	13	13	31.4	47.578	421	1.6402e-44	1.26536	0.765169	1.0476	1.05095	1.04674	1.2799	1.11846	1.35864	1.47176
IPI00443909;IPI00793081;IPI00790734;IPI00383952;IPI00792424;IPI00789541	Protein canopy homolog 2	CNPY2	13	13	65.9	20.652	182	1.2553e-106	0.727643	0.823723	0.912076	1.5178	2.23359	2.25968	0.426785	0.545613	0.69735
IPI00551062;IPI00844103;IPI00000675	Protein canopy homolog 3	CNPY3	8	8	32	30.748	278	3.5013e-202	1.09853	1.02215	1.37741		0.554416	0.845952	0.310001	0.544218	0.735835
IPI00102962;IPI00166955	Protein canopy homolog 4	CNPY4	4	4	10.9	28.309	248	0.00067986									0.626999
IPI00029751;IPI00216641;IPI00479304	Contactin-1	CNTN1	3	3	3.1	113.32	1018	0.0014026							0.68171
IPI00909064;IPI00184821;IPI00783178;IPI00909062	Bifunctional coenzyme A synthase	COASY	12	12	26.5	65.339	593	5.6575e-107	0.350018	0.355366	0.37386	0.790952	0.689132	0.840477	0.53723	0.83689	0.779362
IPI00807589;IPI00384529;IPI00807621;IPI00925646;IPI00807645;IPI00329653;IPI00927568;IPI00927215;IPI00924789	Protein cordon-bleu	COBL	5	5	7.1	143.93	1343	1.0221e-56	5.81869	2.07194	3.41309
IPI00807339;IPI00007133;IPI00807728;IPI00411553;IPI00916729;IPI00916919;IPI00788734	Cordon-bleu protein-like 1	COBLL1	9	8	10.1	134.85	1233	2.5683e-44	2.16525		1.82232				2.08013	3.32182	1.93095
IPI00103483	Negative elongation factor B	COBRA1	10	10	21.9	65.697	580	5.525e-125	0.494927	0.491039	0.475624	0.620964	0.459411	0.619233	0.526316	0.547855	0.426858
IPI00141561;IPI00794563	Conserved oligomeric Golgi complex subunit 1	COG1	19	19	23.7	108.98	980	3.4528e-113	0.73373	0.558441	0.814067	1.36297	1.45359	1.55161	0.784191	0.948677	1.06201
IPI00000057;IPI00643424;IPI00922762	Conserved oligomeric Golgi complex subunit 2	COG2	9	9	15.7	83.207	738	1.4019e-169	0.738498	0.616751	0.943931	1.47091	1.45936	1.91769	0.823655	0.941974	1.39923
IPI00414858;IPI00555771	Conserved oligomeric Golgi complex subunit 3	COG3	14	14	22.5	94.095	828	1.9363e-116	0.851354	0.603573	0.858959	1.27905	1.20399	1.71016	0.786596	0.948947	1.14697
IPI00871406;IPI00149849;IPI00220800;IPI00294999	Conserved oligomeric Golgi complex subunit 4	COG4	11	11	18.7	89.094	785	5.1009e-153	0.930492	0.687521	0.70205	1.16919	1.07657	1.18394	0.776036	0.713623	0.968242
IPI00377050;IPI00007347;IPI00885051	Conserved oligomeric Golgi complex subunit 5	COG5	10	10	15.8	94.876	860	8.003e-162	0.52021	0.405252	0.509944	1.08258	0.976181	1.37425	0.648635	0.779484	0.9522
IPI00642611;IPI00940437;IPI00889669;IPI00398963	cDNA FLJ56431, highly similar to Conserved oligomeric Golgi complex component 6	COG6	9	9	18.7	76.798	690	5.8962e-95	0.564207	0.464943	0.30248	1.3828	1.33034	1.40879	0.740905	0.78235	1.16195
IPI00164005	Conserved oligomeric Golgi complex subunit 7	COG7	16	16	26.5	86.343	770	7.8785e-144	0.40222	0.41862	0.37968	1.03627	1.25786	1.09588	0.589067	0.794723	0.698032
IPI00140201	Conserved oligomeric Golgi complex subunit 8	COG8	5	5	11.7	71.208	639	6.632e-21	0.600348		0.624454	1.22745	1.33672	1.43047	0.604851	0.716332
IPI00006442	Coilin	COIL	8	8	14.6	62.608	576	9.6804e-31			0.945805	1.23324		1.08232			0.40828
IPI00329573;IPI00302944;IPI00221384;IPI00941565;IPI00827759	Collagen alpha-1(XII) chain	COL12A1	25	25	10.2	333.14	3063	9.2683e-212	8.12942		7.53807	0.6879	0.844096		34.8967	12.4367	9.42596
IPI00398272;IPI00643731;IPI00852576;REV_IPI00441959;REV_IPI00171791;REV_IPI00441955;REV_IPI00441952;REV_IPI00921003;REV_IPI00329695;REV_IPI00783670;REV_IPI00441954;REV_IPI00942289;REV_IPI00883941;REV_IPI00028588;REV_IPI00332777	Collagen alpha-1(XVII) chain	COL17A1	21	20	16.8	150.42	1497	4.1384e-116			26.1856				14.9303	29.8927	25.8953
IPI00783931;IPI00022822;IPI00414694;IPI00479309;IPI00796842;IPI00828004	Collagen alpha-1(XVIII) chain	COL18A1	2	2	2.1	178.19	1754	4.0337e-06			6.49899
IPI00306322;IPI00936857;IPI00940293	Collagen alpha-2(IV) chain	COL4A2	2	2	1.5	167.55	1712	8.27e-11							43.399		12.3235
IPI00657692;IPI00024701;IPI00182914	cDNA FLJ39535 fis, clone PUAEN2005502, highly similar to Goodpasture antigen-binding protein (EC 2.7.11.9)	COL4A3BP	12	12	19.3	83.707	752	7.7551e-174	0.488067	0.403812	0.553403	1.42146	1.67712	1.18769	0.93362	1.02834	1.18396
IPI00291136;IPI00942349	Collagen alpha-1(VI) chain	COL6A1	11	11	15.2	108.53	1028	1.0625e-134	14.7842	0.822233	41.9059				0.544484
IPI00304840;IPI00220613;IPI00073454;IPI00915389;IPI00796708	Collagen alpha-2(VI) chain	COL6A2	6	6	7.9	108.58	1019	8.0238e-42	9.27816	55.5494	55.8847
IPI00025418;IPI00795118;IPI00794493	Collagen alpha-1(VII) chain	COL7A1	25	25	13.3	295.22	2944	0							5.23807	10.1176	28.6164
IPI00414467;IPI00885028;IPI00641439	Collectin-12	COLEC12	2	2	2.4	81.524	742	5.615e-05
IPI00171117;IPI00917011;IPI00918005	COMM domain-containing protein 1	COMMD1	3	3	30.5	21.178	190	2.7475e-90	1.18291							1.20494	2.18909
IPI00412811	COMM domain-containing protein 10	COMMD10	7	7	42.6	22.966	202	2.8758e-92	0.669031	0.657419	0.766989	0.961354	0.966184	1.05502	0.604961	0.705268	1.02856
IPI00456048;IPI00791916	COMM domain-containing protein 2	COMMD2	5	5	42.7	22.745	199	2.2033e-06	0.829531	0.939673	0.845023		0.566283	0.493705	0.863334	0.873057	1.27463
IPI00015773;IPI00514949;IPI00514459;IPI00903231;IPI00515123;IPI00922834	COMM domain-containing protein 3	COMMD3	7	7	47.2	22.151	195	2.4248e-55	0.800128	0.812876	0.880902	0.770475	0.597479	0.62251	0.891186	1.27662	1.01591
IPI00413500;IPI00852907;IPI00456702;IPI00796870;IPI00795578;IPI00908997	COMM domain-containing protein 4	COMMD4	5	5	37.7	21.764	199	1.6981e-49		0.86192					1.08256	1.26778	1.6153
IPI00101106	COMM domain-containing protein 5	COMMD5	6	5	40.6	24.67	224	1.0501e-16	0.642508		2.38658	0.764994	1.00142	1.03665	0.671366	0.876732	1.90752
IPI00375957;IPI00889756;IPI00409561	COMM domain-containing protein 6	COMMD6	3	3	42.4	9.638	85	6.6052e-08							1.37618
IPI00743772;IPI00853293	COMM domain-containing protein 7	COMMD7	2	2	11.5	22.54	200	0.00011977			1.18325	0.813074			0.696233
IPI00871891;IPI00016447	Putative uncharacterized protein COMMD8	COMMD8	2	2	12.6	21.124	183	2.7117e-30	0.879585	0.852297		0.488067	0.521241		1.2768	0.949037
IPI00305212;IPI00856091	COMM domain-containing protein 9	COMMD9	7	7	51.5	21.819	198	5.4856e-191	0.964785		0.960799		0.727167	0.677415	0.877655	1.05303	0.779059
IPI00011284;IPI00375513;IPI00878254;IPI00878855;IPI00878765;IPI00880186	Catechol O-methyltransferase	COMT	23	23	76.8	30.037	271	0	0.596516	0.644621	0.7303	1.08501	1.00996	1.35949	0.316967	0.406454	0.427515
IPI00642041;IPI00910238	Catechol-O-methyltransferase domain-containing protein 1	COMTD1	4	4	19.5	28.808	262	1.6853e-29					12.4524	2.58659		1.08868
IPI00295857;IPI00646493	Coatomer subunit alpha	COPA	77	77	68.4	138.34	1224	0	0.884564	0.682594	0.800833	1.19802	1.37485	1.34831	1.19903	1.37432	1.3922
IPI00295851	Coatomer subunit beta	COPB1	58	58	64.3	107.14	953	0	0.798148	0.647082	0.678887	1.32998	1.45866	1.41076	1.24816	1.36868	1.33765
IPI00220219;IPI00908621;IPI00789674	Coatomer subunit beta'	COPB2	56	56	70.1	102.49	906	0	0.72338	0.687711	0.712352	1.01409	1.36301	1.13855	1.15769	1.28924	1.26448
IPI00465132;IPI00399319;IPI00399318	Coatomer subunit epsilon	COPE	23	23	79.5	34.482	308	0	0.905633	0.806972	0.847386	1.1037	1.27228	1.15112	1.01251	1.15423	1.44267
IPI00783982;IPI00794911	Coatomer subunit gamma	COPG	59	49	73.9	97.717	874	0	0.900901	0.761731	0.769053	1.32772	1.46671	1.50541	1.38548	1.43984	1.42414
IPI00002557;IPI00877609;IPI00941186;IPI00926962	Coatomer subunit gamma-2	COPG2	33	28	49.8	97.621	871	0	0.636173	0.538329	0.585103	1.15686	1.16585	1.43361	0.830634	1.10544	1.22432
IPI00018813;IPI00743825	COP9 signalosome complex subunit 2	COPS2	22	22	50.9	52.404	450	6.0788e-172	1.0816	0.965904	0.91416	0.881135	0.745545	0.983187	1.05807	1.14338	1.26809
IPI00025721;IPI00797970;IPI00797314;IPI00788801	COP9 signalosome complex subunit 3	COPS3	20	20	63.4	47.873	423	0	0.894294	0.762486	0.853825	0.648508	0.672314	0.669299	0.872068	0.989511	0.96965
IPI00171844	COP9 signalosome complex subunit 4	COPS4	26	26	79.1	46.268	406	0	0.900739	0.802761	0.857854	0.865426	0.792142	0.94679	0.982415	1.10056	1.29569
IPI00009958;IPI00556139;IPI00791857;IPI00792995	COP9 signalosome complex subunit 5	COPS5	13	13	35	37.578	334	3.4598e-125	0.899038	0.83696	0.944912	0.843953	0.824538	0.936242	1.02943	1.06908	1.26699
IPI00163230;IPI00924791;IPI00924636;IPI00925574;IPI00909067	COP9 signalosome complex subunit 6	COPS6	10	10	36.4	36.163	327	9.5546e-110	0.832848	0.776639	0.790639	0.807037	0.818599	0.87858	1.04112	1.1034	1.21844
IPI00301419;IPI00798179;IPI00902665	COP9 signalosome complex subunit 7a	COPS7A	9	9	42.9	30.276	275	1.6707e-157	0.947867	1.01525	1.01495	1.17904	0.927558	0.960523	1.86578	2.04411	2.31027
IPI00009301;IPI00917481;IPI00445209;IPI00916219;IPI00917140;IPI00478990;IPI00916095;IPI00916369;IPI00917012;IPI00916504;IPI00916690;IPI00917467;IPI00917804	COP9 signalosome complex subunit 7b	COPS7B	6	6	26.5	29.622	264	1.9722e-65	0.825491	0.735943	0.945716	0.745545	1.05022	0.775855	0.558098	0.609942
IPI00009480;IPI00916489;IPI00916030;IPI00377080;IPI00915801;IPI00872083;IPI00916216	COP9 signalosome complex subunit 8	COPS8	5	5	34.9	23.225	209	2.1511e-102	0.821828	1.17026	0.909174	0.730247			1.08418
IPI00032851;IPI00792696;IPI00792095;IPI00791413;IPI00790808	Coatomer subunit zeta-1	COPZ1	6	6	35	20.198	177	2.2546e-138	0.681292	0.604339	0.581937	1.32797	1.27449	1.15417	1.14138	1.17347	1.3133
IPI00942635;IPI00065495;IPI00018628;IPI00736624;IPI00152070;IPI00916273;IPI00915875	COQ10A protein	COQ10A	1	1	4	28.171	252	0.0041865
IPI00418414;IPI00514903	Hexaprenyldihydroxybenzoate methyltransferase, mitochondrial	COQ3	2	2	8.4	40.998	369	0.00011881
IPI00456965;IPI00908347;IPI00742661	Ubiquinone biosynthesis methyltransferase COQ5, mitochondrial	COQ5	8	8	33	37.14	327	1.0568e-90	0.534331	0.468779	0.611958	4.19939	1.25979	2.60954	0.550146		0.531265
IPI00032633;IPI00921877;IPI00328619;IPI00922099;IPI00922119;IPI00921939	Ubiquinone biosynthesis monooxygenase COQ6	COQ6	9	9	31	50.869	468	5.146e-81	0.43096	0.412337	0.408965	1.70593	0.780884	1.51807	0.276457	0.400481	0.5002
IPI00294073;IPI00645720	Ubiquinone biosynthesis protein COQ7 homolog	COQ7	2	2	7.8	24.307	217	0.00093665						2.23659
IPI00470631;IPI00908298;IPI00385901	Ubiquinone biosynthesis protein COQ9, mitochondrial	COQ9	7	7	35.5	35.509	318	1.0193e-64	0.635526		0.664408	3.11594	1.92489	3.17168	0.565323	0.822436	1.26717
IPI00010133;IPI00642725;IPI00908906;IPI00446617	Coronin-1A	CORO1A	13	11	26.2	51.026	461	5.4656e-75	1.36392	1.15238	1.10308	1.02476	1.59023	0.51581	2.42424	1.73037	1.25246
IPI00007058;IPI00908316;IPI00867659	Coronin-1B	CORO1B	21	20	47.4	54.234	489	4.1314e-232	0.36014	0.4044	0.542005	0.65548	0.864603	0.644995	0.381577	0.380113	0.463285
IPI00867509;IPI00943173;IPI00798401;IPI00797709;IPI00903139;IPI00789933;IPI00034860;IPI00783124;IPI00939459;IPI00903270	Coronin-1C_i2 protein	CORO1C	23	20	41.9	58.947	527	1.2984e-283	1.79504	1.81222	4.08047	1.12139		1.0594	1.86965	3.31587	3.97062
IPI00023736	Coronin-2A	CORO2A	1	1	2.3	59.763	525	8.696e-08
IPI00027996	Coronin-7	CORO7	17	1	25.9	100.57	925	1.8262e-286	0.205744	0.318684	0.313568	0.470544	0.348481	0.361024	0.341763	0.300571	0.413616
IPI00017704	Coactosin-like protein	COTL1	15	15	83.1	15.945	142	3.2742e-149	7.7101	8.38153	10.3772	0.387192		0.721345	3.93499	4.11066	4.56267
IPI00295394;IPI00794128;IPI00938235	Cytochrome c oxidase assembly protein COX11, mitochondrial	COX11	1	1	7.2	31.43	276	1.6622e-45
IPI00419869;IPI00455190	Cytochrome c oxidase assembly protein COX15 homolog	COX15	2	2	6.3	46.03	410	2.6008e-08	1.05742			0.811622	4.19516
IPI00796062;IPI00218144;IPI00477819	Cytochrome c oxidase copper chaperone	COX17	3	3	33.7	10.853	98	3.7573e-24			0.919963				0.353245		0.342841
IPI00006579;IPI00645361	Cytochrome c oxidase subunit 4 isoform 1, mitochondrial	COX4I1	15	15	60.4	19.576	169	5.254e-78	0.774054	1.32198	0.713012	1.87963	4.79916	1.57649	0.837731	0.710278	0.318624
IPI00005740;IPI00915313	Neighbor of COX4	COX4NB	6	6	38.1	23.773	210	3.2296e-45	1.00532	1.00168	1.10344		0.602083	2.35183		0.624181	0.82447
IPI00025086	Cytochrome c oxidase subunit 5A, mitochondrial	COX5A	8	8	46	16.762	150	6.6844e-48	0.418095	1.08715	0.718752	1.18448	4.95417	1.66597	0.842957	0.774114	0.350471
IPI00021785	Cytochrome c oxidase subunit 5B, mitochondrial	COX5B	6	6	31	13.696	129	6.1506e-23	0.548456		0.837451	0.561577	40.1752	2.11752	0.921659	0.139706	0.449236
IPI00021793;IPI00176681;IPI00383598	Cytochrome c oxidase subunit 6A1, mitochondrial	COX6A1	3	3	54.1	12.155	109	0.0019129	0.628417	1.10081	0.184478	1.15013	5.01706	1.35779			0.353294
IPI00797738;IPI00216085	Cytochrome c oxidase subunit 6B1	COX6B1	4	4	48.5	12.035	103	1.1878e-177	0.383245		0.598767	0.383465	43.5654	1.95332	0.688705		0.206377
IPI00015972	Cytochrome c oxidase subunit 6C	COX6C	5	5	50.7	8.7813	75	2.12e-31			0.702889	4.22708	11.3976	2.3303	0.892379		0.236535
IPI00026570;IPI00872879	Cytochrome c oxidase polypeptide 7A2, mitochondrial	COX7A2	3	3	21.7	12.844	115	9.511e-61	0.544692		0.645745	2.07835	7.25742	1.72718	0.835003	0.71541	0.273396
IPI00022421;IPI00893199;IPI00892592	Cytochrome c oxidase subunit 7A-related protein, mitochondrial	COX7A2L	3	3	20.2	12.615	114	4.7504e-16			0.807689	1.67732	3.73972
IPI00013968;IPI00436520	Cytochrome c oxidase subunit 7C, mitochondrial	COX7C	2	2	41.3	7.2454	63	5.8492e-14						2.57599	0.440839		0.287431
IPI00008894	Carboxypeptidase A4	CPA4	4	4	12.4	47.351	421	3.8908e-18							12.8783
IPI00027078;IPI00921861	Carboxypeptidase D	CPD	15	15	11.7	152.93	1380	4.4433e-66	1.04081	0.828089	1.16539	5.38445	9.32227	4.02836	4.04973	6.92042	6.35405
IPI00031121;IPI00853537	Carboxypeptidase E	CPE	4	4	10	63.674	572	2.6309e-25					0.143076				5.8292
IPI00375652;IPI00386558;IPI00181719	Cytoplasmic polyadenylation element-binding protein 4	CPEB4	1	1	1.5	80.151	729	0.001212
IPI00026270;IPI00794541	Carboxypeptidase M	CPM	4	4	10.4	50.513	443	1.9286e-08	4.55332		42.924
IPI00894409;IPI00018452;IPI00917016;IPI00852917;IPI00892994;IPI00643325;IPI00645712;IPI00645270;IPI00642976;IPI00646121;IPI00647692;IPI00644561;IPI00643422;IPI00642168;IPI00642736;IPI00640313;IPI00917163;IPI00552982;IPI00645385	Copine I	CPNE1	13	13	26	59.717	542	4.4081e-218	1.66196	1.271	1.45643	1.41235	1.33975	1.38839	0.498828	0.715205	0.704871
IPI00645310	Copine-2	CPNE2	4	3	8.4	63.963	574	7.6725e-39			5.95274
IPI00024403;IPI00002657;IPI00295469;IPI00030532;IPI00219842;IPI00219004;IPI00059186;IPI00332395;IPI00797947;IPI00797798	Copine-3	CPNE3	22	21	44.1	60.13	537	0	1.161	1.14346	1.52082	1.74816	1.70742	1.57714	1.2834	1.25922	1.19181
IPI00384746;IPI00334276;IPI00793395	Copine-8	CPNE8	2	1	5	63.107	564	2.1066e-13
IPI00093057;IPI00794067	Coproporphyrinogen-III oxidase, mitochondrial	CPOX	16	16	41.2	50.151	454	1.7866e-155	1.48287	1.26072	2.00928	0.891742	0.708165	0.895977	1.448	1.93289	2.11712
IPI00305010;IPI00426077;IPI00909311	Calcineurin-like phosphoesterase domain-containing protein 1	CPPED1	4	4	20.4	35.576	314	1.7427e-45							5.31773		2.68731
IPI00889534;IPI00011062;IPI00397498;IPI00926403;IPI00926199	Carbamoylphosphate synthetase I	CPS1	21	20	18.1	165.65	1506	5.8751e-168	6.66756	2.37739	4.08313	4.68955					10.0513
IPI00026219	Cleavage and polyadenylation specificity factor subunit 1	CPSF1	21	21	17.7	160.88	1443	2.5513e-169	0.94402	1.33842	0.934056	1.06427	1.1341	0.774234	0.698275	0.56057	0.482882
IPI00419531;IPI00902580	Cleavage and polyadenylation specificity factor subunit 2	CPSF2	12	12	23.1	88.486	782	1.3126e-113	0.84832	1.10152	0.805348	1.19143	0.980681	0.896298	1.03323		0.51164
IPI00007818;IPI00807384	Cleavage and polyadenylation specificity factor subunit 3	CPSF3	13	13	25.4	77.485	684	4.8724e-165	0.815195	0.886446	0.849401	0.695749	0.58627	0.578704	0.774773	0.703581	0.581937
IPI00063404;IPI00514973;IPI00513900;IPI00306882;IPI00514808;IPI00386782;IPI00513774	Integrator complex subunit 11	CPSF3L	4	4	11	67.662	600	3.2175e-14	0.592979	0.508285					0.651721	0.68264
IPI00009137;IPI00029707;IPI00375469;IPI00927478;IPI00924476	Cleavage and polyadenylation specificity factor subunit 4	CPSF4	2	1	8.9	30.255	269	1.5389e-12									0.563634
IPI00030654;IPI00012998;IPI00647126;IPI00910864;IPI00797184	Cleavage and polyadenylation specificity factor subunit 6	CPSF6	10	10	22.3	63.47	588	3.1316e-292	1.19626	1.34374	1.21259	0.840266	0.750188	0.993937	0.757346	0.670691	0.623364
IPI00915356;IPI00550821;IPI00719106;IPI00927669;IPI00927882;IPI00926271;IPI00926462;IPI00921501	Cleavage and polyadenylation specificity factor subunit 7	CPSF7	12	12	27	56.374	514	2.4708e-235	0.58924	0.70141	0.579912	0.691515	0.518672	0.575374	0.652146	0.538126	0.479524
IPI00032038;IPI00479108;IPI00021925;IPI00877658;IPI00921936;IPI00922376	Carnitine O-palmitoyltransferase 1, liver isoform	CPT1A	34	34	45.4	88.367	773	0	0.410038	0.562525	0.56373	2.2118	1.0272	1.73379	0.212233	0.163658	0.202331
IPI00012912	Carnitine O-palmitoyltransferase 2, mitochondrial	CPT2	25	25	43.8	73.776	658	2.6728e-175	0.527621	0.382804	0.618965	4.51692	3.66475	5.3217	0.710833	1.08095	1.65906
IPI00219930	Cellular retinoic acid-binding protein 1	CRABP1	1	1	6.6	15.565	137	0.036314
IPI00216088;IPI00643056	Cellular retinoic acid-binding protein 2	CRABP2	14	14	71.7	15.693	138	1.9907e-191	0.859328	0.32495	0.342044	2.65139	6.29802	3.61847	0.0840124	0.176722	0.0511352
IPI00020364;IPI00789201;IPI00383718;IPI00908919;IPI00791849	Death domain-containing protein CRADD	CRADD	2	2	15.1	22.745	199	2.6404e-05
IPI00016457;IPI00514595;IPI00029140;IPI00853033;IPI00852692;IPI00927749	Carnitine O-acetyltransferase	CRAT	20	20	37.4	70.857	626	1.1061e-167	6.53766		9.43485	75.706	49.0412	22.0863	1.39661
IPI00165433	Crumbs protein homolog 3	CRB3	2	2	17.9	13.113	123	0.013683	4.29719
IPI00045917;IPI00641620;IPI00925344;IPI00925252;IPI00790008;IPI00926883;IPI00925600;IPI00797356;IPI00796158	Protein cereblon	CRBN	3	3	11.3	50.545	442	2.8668e-66	1.26097	0.679117			0.896138
IPI00152889;IPI00514670;IPI00644441;IPI00647386	Cyclic AMP-responsive element-binding protein 3-like protein 4	CREB3L4	1	1	4.3	43.432	395	0.0016932
IPI00478946;IPI00027461;IPI00216189;IPI00397362;IPI00410078	Cyclic AMP-responsive element-binding protein 5	CREB5	1	1	1.8	56.918	508	0.036314
IPI00023339;IPI00619932;IPI00155855	CREB-binding protein	CREBBP	5	1	2	265.35	2442	3.8738e-11
IPI00021997	Protein CREG1	CREG1	2	2	15	24.074	220	1.0207e-208							2.72613	5.26399
IPI00794252;IPI00796204;IPI00419731;IPI00794793;IPI00386754;IPI00797918;IPI00879774;IPI00879605	Cysteine-rich with EGF-like domain protein 2	CRELD2	7	7	12.9	43.578	402	1.8342e-18			0.997307			0.640861	0.886211	0.350385	1.00615
IPI00215611	Cysteine-rich protein 1	CRIP1	5	5	59.7	8.5328	77	1.4311e-29					443.046	72.2439
IPI00921911;IPI00006034	cDNA FLJ56946, highly similar to Cysteine-rich protein 2	CRIP2	10	10	43.6	30.221	282	0	0.288792	0.3333	0.415351	1.4529	0.811491	1.28385	0.45405	0.641807	0.649562
IPI00004838;IPI00399054;IPI00305469	Proto-oncogene C-crk	CRK	14	14	64.8	33.83	304	0	1.28444	1.38213	1.39291	0.648929	0.565068	0.603464	1.2342	1.18311	1.54775
IPI00004839	Crk-like protein	CRKL	16	16	75.9	33.777	303	0	1.93125	1.93532	1.9619	0.806647	0.745935	0.722439	1.22372	1.62745	1.62491
IPI00021175;IPI00923566;IPI00868781;IPI00910891	Cell division cycle 2-related protein kinase 7	CRKRS	4	2	3.6	164.15	1490	8.2638e-23	1.04719	1.26733		0.763068
IPI00295387	Cytokine receptor-like factor 3	CRLF3	4	4	11.8	49.765	442	8.8742e-14	1.82309	1.32852		0.855139			1.47386		2.02897
IPI00177437;IPI00219318;IPI00219317	Crooked neck-like protein 1	CRNKL1	14	14	16.7	100.45	848	4.0069e-103	0.856458	0.681338	0.522739	1.10474	1.36127	0.945358	0.385922		0.214869
IPI00456492;IPI00644892	Rootletin	CROCC	4	3	2.1	228.52	2017	0.003938		1.51421	0.633714	5.44247			0.415351		1.3898
IPI00107745;IPI00448519;IPI00470619	Cisplatin resistance-associated overexpressed protein	CROP	15	14	30.6	51.466	432	0	1.36277	1.09841	1.13617	1.9286	2.19053	1.64433	0.875197	0.683153	0.598731
IPI00292763;IPI00924730;IPI00921172;IPI00384241	Peroxisomal carnitine O-octanoyltransferase	CROT	2	2	6.2	70.178	612	7.1946e-05								3.52522
IPI00479534;IPI00844220;IPI00413272;IPI00646226;IPI00867654;IPI00472333;IPI00927553	Cofactor required for Sp1 transcriptional activation, subunit 3, 130kDa	CRSP3	8	8	7.6	157.11	1374	1.5063e-68	0.752162	0.835073	0.873515	0.896218	0.669434	0.964785	0.620463	0.350976
IPI00748502;IPI00793277;IPI00902594;IPI00888408;IPI00795368	Cartilage-associated protein	CRTAP	7	7	17.5	46.561	401	5.4753e-38	3.4727	4.50471		0.640451			9.42152	7.80945
IPI00412329;IPI00783099;IPI00303383	CREB-regulated transcription coactivator 1	CRTC1	1	1	1.5	68.781	650	0.0020405
IPI00783502;IPI00639850	CREB-regulated transcription coactivator 2	CRTC2	6	6	12.8	73.301	693	2.3989e-38	1.34915	1.39466	1.49568	2.0784	1.85195	2.17846			0.826993
IPI00021062;IPI00796777;IPI00795775	Alpha-crystallin A chain	CRYAA	1	1	4.6	19.909	173	0.00035261		4.80469
IPI00021369;IPI00792299;IPI00794466	Alpha-crystallin B chain	CRYAB	7	7	53.1	20.159	175	2.459e-67	19.5419	91.7263	32.5087				23.2223	230.707	16.7473
IPI00006443;IPI00645031;IPI00909277	Lambda-crystallin homolog	CRYL1	4	4	22.9	35.419	319	3.0932e-30	0.5124			2.42665				0.573658	2.25332
IPI00000792;IPI00647366;IPI00641565;IPI00642016;IPI00874075;IPI00645425	Quinone oxidoreductase	CRYZ	14	14	58.1	35.206	329	9.4683e-266	1.38804	1.13917	1.94295	1.80209	2.11999	2.33803	0.572902	0.750188	1.11561
IPI00852997;IPI00438923;IPI00657749;IPI00657674;IPI00877972;IPI00877784;IPI00853457;IPI00927508;IPI00375316;IPI00853327;IPI00877631;IPI00853269;IPI00853123;IPI00853608;IPI00853409	Putative uncharacterized protein CRYZL1	CRYZL1	6	6	19	41.612	373	7.371e-16	1.90483	2.21828	2.63206		1.22495		1.47643	1.57134	1.81511
IPI00025366;IPI00793839;IPI00383539;IPI00795080;IPI00796979;IPI00791780;IPI00791211;IPI00795682;IPI00792509	Citrate synthase, mitochondrial	CS	20	20	44.2	51.712	466	3.1676e-272	1.70407	0.881834	1.76807	1.9052	1.24685	1.72753	0.535705	0.604631	0.833611
IPI00925494;IPI00789682;IPI00465165;IPI00791483;IPI00018011;IPI00926431	CSAD protein	CSAD	1	1	3.3	58.011	520	2.4685e-31
IPI00031801;IPI00219148;IPI00555698;IPI00790453	DNA-binding protein A	CSDA	19	3	62.6	40.089	372	0	1.28718	1.08244	0.956389	0.583158	0.563317	0.623208	0.964785	0.977326	0.870853
IPI00219147	DNA-binding protein A	CSDA	17	1	72.3	31.947	303	0			2.49016						1.54017
IPI00470891;IPI00844264;IPI00873244	Cold shock domain-containing protein E1	CSDE1	44	44	55.5	88.884	798	0	0.434537	0.716332	0.345137	0.505919	0.496253	0.237869	0.816127	0.552822	0.27154
IPI00022744;IPI00219994;IPI00910737;IPI00910298;IPI00219762	Exportin-2	CSE1L	51	51	65.6	110.42	971	0	1.62824	1.42778	1.72102	1.53139	1.02345	1.59586	1.17049	1.29559	1.32547
IPI00013212;IPI00910540;IPI00477563;IPI00000868;IPI00160403	Tyrosine-protein kinase CSK	CSK	16	16	43.6	50.704	450	3.3786e-107	0.380633	0.461851	0.477076	0.720981	0.576103	0.631194	0.606428	0.626684	0.775615
IPI00448798;IPI00183400;IPI00167096	Casein kinase I isoform alpha	CSNK1A1	15	15	39.7	41.937	365	3.4e-157	1.07259	1.03007	1.17959	2.773	2.63421	1.96781	1.21203	0.997805	1.41579
IPI00011102;IPI00234463;IPI00556134;IPI00878751;IPI00878583;IPI00797824;IPI00878374;IPI00878570;IPI00910946	Casein kinase I isoform delta	CSNK1D	12	3	37.6	47.33	415	6.7787e-98	1.0216	0.976944	1.05958	2.47341	2.42542	1.84454	1.30263	0.975419	1.23729
IPI00027729;IPI00848174;IPI00892867;IPI00878432	Casein kinase I isoform epsilon	CSNK1E	10	1	27.2	47.315	416	1.4407e-56
IPI00297767;IPI00184779	Casein kinase I isoform gamma-2	CSNK1G2	3	1	9.2	47.457	415	7.3664e-11				1.79976				1.56583
IPI00218437;IPI00181294;IPI00410228;IPI00941996;IPI00788259;IPI00791893;IPI00465058;IPI00219823;IPI00938020;IPI00792456	Casein kinase I isoform gamma-3	CSNK1G3	3	1	7	52.377	455	4.7246e-05
IPI00016613;IPI00744507;IPI00741317;IPI00784195;IPI00472911	cDNA, FLJ92904, highly similar to Homo sapiens casein kinase 2, alpha 1 polypeptide (CSNK2A1), mRNA	CSNK2A1	23	22	53.7	45.908	397	0	1.36141	1.22632	1.36939	1.15508	1.3676	1.32897	1.04745	1.14099	0.979528
IPI00020602	Casein kinase II subunit alpha'	CSNK2A2	13	12	37.1	41.213	350	7.0798e-70	0.990589	0.98824	1.11631	0.465636	0.466266	0.546448	1.22641	1.18946	1.57562
IPI00640088;IPI00010865;IPI00514910;IPI00908480;IPI00843824;IPI00647922	Casein kinase 2 beta polypeptide	CSNK2B	7	7	37.2	26.925	234	1.483e-90	1.3816	1.53384	1.45419	1.02826	0.911245	1.05361	1.27455	1.16431	0.967118
IPI00019157;IPI00873990;IPI00942413	Chondroitin sulfate proteoglycan 4	CSPG4	10	10	5.8	250.49	2322	3.7132e-59									8.41893
IPI00442073;IPI00921301	Cysteine and glycine-rich protein 1	CSRP1	12	12	66.3	20.567	193	6.8587e-203	0.525928	0.465398	0.454711	1.14041	1.35349	0.963763	1.27866	1.41217	1.16318
IPI00002824;IPI00793531;IPI00792951;IPI00791139;IPI00794630	Cysteine and glycine-rich protein 2	CSRP2	5	5	34.7	20.954	193	1.9322e-28									20.956
IPI00032293	Cystatin-C	CST3	2	2	23.3	15.799	146	0.00059764	0.453515				1.50693
IPI00032325;IPI00794081	Cystatin-A	CSTA	5	5	62.2	11.006	98	4.2688e-51							188.331	128.427	14.5452
IPI00021828	Cystatin-B	CSTB	9	9	85.7	11.139	98	1.0262e-214	4.69329	4.3535	8.55213	1.05216	1.35573	1.26992	1.54693	1.76532	2.91223
IPI00011528;IPI00644499;IPI00789964	Cleavage stimulation factor 50 kDa subunit	CSTF1	13	13	43.9	48.357	431	1.3809e-240	0.477897	0.659892	0.48998	0.766225	0.776458	0.590145	0.572541	0.531265	0.356087
IPI00902991;IPI00013256;IPI00607841;IPI00909622	BetaCstF-64 variant 2	CSTF2	14	7	29.6	62.928	597	2.0655e-194	1.07436	1.23611	1.18258	0.723223	0.671096	0.739044	0.719321	0.595557	0.607792
IPI00550906	Cleavage stimulation factor 64 kDa subunit, tau variant	CSTF2T	9	2	20.6	64.436	616	1.3438e-85
IPI00015195	Cleavage stimulation factor 77 kDa subunit	CSTF3	16	16	28	82.921	717	5.7451e-200	0.95057	0.976276	1.01998	0.890155	0.74677	1.07406	1.03243	0.890551	0.728863
IPI00908361;IPI00915443;IPI00930437;IPI00006122;IPI00402229;IPI00401163;IPI00515009;IPI00218139;IPI00915291;IPI00930301;IPI00930439	cDNA FLJ55352, highly similar to Cutaneous T-cell lymphoma-associated antigen 5	CTAGE5	14	2	27.8	76.878	672	3.9929e-103	1.27953	0.79277	1.05937	2.47807	2.54959	3.0498		1.11238	1.30851
IPI00872345;IPI00915283;IPI00847772	Cutaneous T-cell lymphoma-associated antigen 5	CTAGE5	13	1	22.1	82.442	729	5.0793e-78
IPI00012835;IPI00554626	C-terminal-binding protein 1	CTBP1	10	6	25.5	47.535	440	8.7415e-139	0.933968	0.808931	0.84488		0.700084	0.770713	0.949397	2.3731
IPI00450767	CTBP1 protein	CTBP1	1	1	12.3	23.692	227	0.0048987
IPI00010136;IPI00647506;IPI00010120	C-terminal-binding protein 2	CTBP2	14	10	20.6	106.19	985	1.3837e-237	1.16275	0.974659	1.09891	1.31086	1.12573	1.28594	1.03399	1.22761	1.04013
IPI00007778;IPI00643023	Di-N-acetylchitobiase	CTBS	2	2	8.6	43.759	385	2.9724e-07					4.42733		1.29971	1.57161
IPI00027988;IPI00556456;IPI00902532	Transcriptional repressor CTCF	CTCF	8	8	13.1	82.785	727	4.0898e-105			0.524466	0.602954	0.451223	0.459622	0.307986		0.243671
IPI00410256;IPI00873195;IPI00410257;IPI00410258;IPI00640254	RNA polymerase II subunit A C-terminal domain phosphatase	CTDP1	7	7	9.5	104.3	961	4.4815e-16	3.20955		2.91129			1.19649			1.1956
IPI00022524;IPI00873134	Small CTD phosphatase 2	CTDSP2	1	1	3.9	31.761	283	0.00012968
IPI00024826;IPI00454757;IPI00926023;IPI00009633;IPI00376211;IPI00927233;IPI00925357;IPI00385297;IPI00927578;IPI00927629	CTD small phosphatase-like protein	CTDSPL	1	1	2.9	37.875	340	0.0032763
IPI00033054;IPI00871437	CTD small phosphatase-like protein 2	CTDSPL2	2	2	5.2	52.998	466	3.9516e-11			2.1427
IPI00020977;IPI00220647	Connective tissue growth factor	CTGF	3	3	8	38.091	349	7.1246e-12			15.4223
IPI00031557;IPI00908512;IPI00221301	Cystathionine gamma-lyase	CTH	6	6	25.9	44.508	405	2.302e-68	1.51055	1.8166	6.19809	4.60299	5.06073	12.0844	2.82374	10.8859	5.58005
IPI00215948;IPI00473136;IPI00514038;REV_IPI00009859;REV_IPI00397946;IPI00917211	Catenin alpha-1	CTNNA1	53	43	65.3	100.07	906	0	1.54916	1.43897	1.11099	0.377444	0.381607	0.301878	1.95244	2.73441	1.34358
IPI00385055;IPI00743859;IPI00916487;IPI00916353	Catenin alpha-2	CTNNA2	9	1	11.1	105.4	954	7.1938e-117
IPI00001712;IPI00645669	Catenin alpha-3	CTNNA3	2	1	3.7	99.808	895	5.1779e-21
IPI00179328;IPI00549924;IPI00000163;IPI00643624	Alpha-catulin	CTNNAL1	3	3	7.2	81.895	734	2.4804e-32	3.16256		2.27371
IPI00017292;IPI00927799;IPI00219893;IPI00788993;IPI00925083;IPI00792321;IPI00926114;IPI00924607;IPI00925425	Catenin beta-1	CTNNB1	32	27	53.9	85.496	781	0	4.74271	3.87747	2.90765	0.364524	0.180548	0.152207	3.46069	6.4792	2.89268
IPI00514012;IPI00025001	Putative uncharacterized protein CTNNBIP1	CTNNBIP1	1	1	6.5	16.472	155	0.00029384
IPI00844214;IPI00472981;IPI00645320;IPI00789216	Beta-catenin-like protein 1	CTNNBL1	15	15	25.6	65.173	563	5.8665e-61	1.24477	1.39196	1.20254	0.994036	0.975515	1.01377	0.796876	0.629763	0.617246
IPI00219868;IPI00219870;IPI00219726;IPI00219728;IPI00942869;IPI00182469;IPI00219875;IPI00219725;IPI00219735;IPI00219738;IPI00219873;IPI00940850;IPI00845519;IPI00219733;IPI00219731;IPI00219734;IPI00219732;IPI00219869;IPI00182540;IPI00219872;IPI00419482;IPI00219727;IPI00219730;IPI00219741;IPI00219742;IPI00219737;IPI00219739;IPI00845246;IPI00219745;IPI00219747;IPI00219743;IPI00219744;IPI00219749;IPI…	Catenin delta-1	CTNND1	46	46	57.3	104.98	939	0	1.83291	1.41892	1.30041	1.27126	1.83261	1.34171	2.32455	3.52871	2.36468
IPI00301317;IPI00220032;IPI00890767	Catenin delta-2	CTNND2	2	1	2	132.65	1225	0.0014908
IPI00290142;IPI00921944	CTP synthase 1	CTPS	27	25	55.3	66.69	591	0	1.4758	1.4498	1.55792	0.778089	0.724375	0.831324	1.16859	1.10991	1.19716
IPI00645702;IPI00553127	CTP synthase 2	CTPS2	16	14	31.7	65.677	586	2.044e-138	0.183905	0.305455	0.267123	0.97561	0.779788	1.11962	0.438847	0.448934	0.68465
IPI00477468	RNA polymerase-associated protein CTR9 homolog	CTR9	14	14	18	133.5	1173	4.641e-75	0.746269	0.897827	0.791954	1.04101	1.00338	0.796052	0.86408	0.613422	0.354736
IPI00295741;IPI00909303;IPI00941296;IPI00788996	Cathepsin B	CTSB	13	13	36.9	37.821	339	0	13.8819	11.9318	13.6739	0.949848	1.39938		27.502	31.739	26.2096
IPI00022810;IPI00872258;IPI00872443;IPI00171323;IPI00941964	Dipeptidyl-peptidase 1	CTSC	13	13	32.6	51.841	463	5.2627e-253	8.47529	7.74473	5.56824	0.526648	0.645703		48.1024	59.5132	23.19
IPI00011229;IPI00853455;IPI00852597;IPI00892793;IPI00658053	Cathepsin D	CTSD	22	10	54.1	44.552	412	0	0.806842	0.987557	0.615953	1.63473	2.9529	1.03358	2.54848	5.251	2.2628
IPI00012887;IPI00640540	Cathepsin L1	CTSL1	3	3	18.3	37.564	333	1.3776e-38
IPI00000013	Cathepsin L2	CTSL2	8	8	38.6	37.329	334	4.0804e-50							46.9881	45.556
IPI00017257	Cathepsin O	CTSO	1	1	3.1	35.957	321	0.01427
IPI00002745;IPI00448792	Cathepsin Z	CTSZ	7	7	31	33.868	303	3.6497e-34							32.0935	8.04894	31.4386
IPI00029601;IPI00791680;IPI00792087	Src substrate cortactin	CTTN	37	4	58.5	61.585	550	0	2.50514	2.47985	2.62219	0.663042	0.607829	0.673764	1.0027	1.09656	1.33064
IPI00746806	cDNA FLJ54828, highly similar to Src substrate cortactin	CTTN	31	1	46.4	70.958	634	0			1.24955			0.686106			0.961446
IPI00514311;IPI00103980	CTTNBP2 N-terminal-like protein	CTTNBP2NL	8	8	14.2	70.157	639	1.3553e-17		1.61823	1.52341	1.49757			3.6135		2.85584
IPI00418412;IPI00455719;IPI00554765;IPI00848327;IPI00642103	Cytoplasmic tRNA 2-thiolation protein 2	CTU2	4	4	7.8	63.713	586	8.321e-34	0.472411	0.517786	1.43715		0.373315	1.1513	0.25108	0.288226
IPI00853009;IPI00034015;IPI00218389;IPI00218388;IPI00410277;IPI00845479;IPI00845480;IPI00607544;IPI00853320;IPI00910773	CUG-BP- and ETR-3-like factor 1	CUGBP1	9	9	18.2	55	512	1.1987e-134	0.65189	0.704374	0.65505	0.635445	0.37968	0.565131	0.799616	0.784683	0.686577
IPI00014310;IPI00917192	Cullin-1	CUL1	24	23	33	89.677	776	4.8501e-176	0.749738	0.67815	0.796876	0.71286	0.509295	0.735456	1.00883	1.04555	0.954654
IPI00014311;IPI00642151;IPI00647073;IPI00922263;IPI00643617;REV_IPI00005635;REV_IPI00927036;REV_IPI00926829;REV_IPI00794893	Cullin-2	CUL2	30	29	44.5	89.503	764	0	1.79346	1.48278	1.99056	1.08516	1.06253	1.24199	0.9273	0.967024	1.19303
IPI00014312;IPI00382458;IPI00382459;IPI00917651;IPI00917208;IPI00916926;IPI00025819;IPI00748752;IPI00218763;IPI00218764;IPI00939965;IPI00940948;IPI00175639;IPI00791842;IPI00549214;IPI00789753;IPI00791276	Cullin-3	CUL3	30	30	40.4	88.929	768	0	1.01812	0.832848	0.972006	0.830496	0.608569	0.71048	0.664452	0.732279	0.784683
IPI00935649;IPI00419273;IPI00549919	Putative uncharacterized protein CUL4A	CUL4A	25	16	35.6	87.727	759	9.7196e-198	2.40883	1.87684	2.21366	1.92879	1.69331	1.6305	1.0741	1.17707	1.21178
IPI00480142;IPI00643885;IPI00179057;IPI00644450	Cullin-4B	CUL4B	27	19	31	103.98	913	3.4602e-287	2.71142	2.11349	2.4126	1.22817	0.927558	1.46282	1.13714	1.51805	1.28952
IPI00216003;IPI00871370	Cullin-5	CUL5	15	15	22	96.725	837	1.1296e-167	1.63688	1.17503	1.74697	1.40343	1.15804	1.62364	1.32385	1.3788	1.9931
IPI00001690	Cullin-7	CUL7	5	4	3.4	191.16	1698	3.2954e-09	1.28401		0.902527				2.44129		1.34324
IPI00034319;IPI00554634;IPI00554556	Protein CutA	CUTA	5	5	37.4	20.925	198	2.6123e-101	1.20019	1.71765	1.34461			0.68975	1.05284	1.05095	1.82249
IPI00300408	Copper homeostasis protein cutC homolog	CUTC	1	1	5.5	29.341	273	0.0004557						3.82482
IPI00419894;IPI00026673;IPI00472000;IPI00472247;IPI00873332;IPI00742111;IPI00736943;IPI00741668;IPI00071696;IPI00926621;IPI00927318;IPI00910893;IPI00877848;IPI00927701	Homeobox protein cut-like 1	CUX1	9	9	9.3	165.69	1516	3.1121e-110	0.554354	0.381214	0.560475		1.26064	0.35084	0.332027
IPI00009009	Protein CWC15 homolog	CWC15	5	5	24.5	26.624	229	3.7078e-68	1.43556		1.27094	1.22994					0.700722
IPI00101600;IPI00478313;IPI00386343	CWF19-like protein 1	CWF19L1	9	9	20.8	60.618	538	1.195e-93	1.84233	1.69535	1.58453	1.15997	1.13458	1.20662	0.900576	0.93932	0.638692
IPI00065515;IPI00937846;IPI00878006;IPI00879290	CWF19-like protein 2	CWF19L2	2	2	3.4	103.79	894	0.0040798
IPI00019146;IPI00874147;IPI00607658	Coxsackievirus and adenovirus receptor	CXADR	1	1	6.3	40.029	365	4.3735e-11
IPI00107104;IPI00640930	UPF0368 protein Cxorf26	CXorf26	13	13	53.6	26.056	233	7.2966e-157	2.1595	2.26019	2.57116	1.13651	1.71524	2.64236	2.58659	2.1964	2.55571
IPI00152089;IPI00910523;IPI00607830;IPI00552646	Uncharacterized protein CXorf38	CXorf38	3	3	7.8	36.67	319	0.0037352	5.003		0.241319						0.648214
IPI00005055;IPI00335006	UPF0428 protein CXorf56	CXorf56	3	3	16.7	25.624	222	3.3619e-42	1.50101		1.09067		0.622975		0.819605		0.349113
IPI00257965	Uncharacterized protein CXorf67	CXorf67	2	2	4.4	51.893	503	0.0050104	53.9898			16.9471
IPI00794485;IPI00027144	cDNA FLJ55917, highly similar to Cytochrome b561 domain-containing protein 1	CYB561	2	2	7.9	34.785	318	2.2691e-36	0.384305				3.93654
IPI00013026;IPI00792273;IPI00789903;IPI00925455	Cytochrome b561 domain-containing protein 2	CYB561D2	1	1	5.4	23.973	222	9.622e-20					5.54416
IPI00397860;IPI00871858;IPI00182933;IPI00645474;IPI00646039	Cytochrome b5	CYB5A	6	6	56	15.33	134	8.953e-112	2.05732	3.38834	3.89575	1.96754	4.914	1.89635	0.337427	0.161634	0.2531
IPI00303954;IPI00641334	Cytochrome b5 type B	CYB5B	7	7	66	16.694	150	2.2494e-97	0.754546	0.716486	0.85419	0.47335	0.361376		0.843882	0.934579	1.04129
IPI00470674;IPI00643530;IPI00911104	NADH-cytochrome b5 reductase 1	CYB5R1	10	10	36.4	34.094	305	3.6159e-78	0.672812	0.488043	0.927386	3.13982	3.85936	4.63671	2.18422	3.16026	3.81854
IPI00328415;IPI00871319;IPI00446235;IPI00879792;IPI00879692	NADH-cytochrome b5 reductase 3	CYB5R3	20	20	57.5	38.226	334	3.453e-280	4.88926	3.14139	5.10595	1.42537	1.47761	1.57746	1.78814	2.6656	4.03372
IPI00029264	Cytochrome c1, heme protein, mitochondrial	CYC1	10	10	34.8	35.39	325	5.1775e-143	0.635566	1.54214	0.742776	2.34071	5.82513	2.43202	0.590702	0.726216	0.466701
IPI00465315;IPI00917605;IPI00176698;IPI00943180;CON_CytC	Cytochrome c	CYCS	7	7	56.2	11.749	105	1.2319e-208	0.692809	0.639141	1.00002	2.08703	3.06909	3.48371	0.610911	0.878657	0.972573
IPI00644231;IPI00903062;IPI00550212;IPI00790459;IPI00790673	Cytoplasmic FMR1-interacting protein 1	CYFIP1	47	30	44.5	145.18	1253	0	2.5468	1.87431	2.66959	1.2047	1.10267	1.37238	1.62485	1.91095	1.9644
IPI00719600;IPI00789699;IPI00922002;IPI00921821;IPI00383109;IPI00871615	Cytoplasmic FMR1-interacting protein 2	CYFIP2	20	3	19.3	145.67	1253	7.0895e-217			1.89714
IPI00103373	Cytoglobin	CYGB	3	3	14.7	21.404	190	0.00048693									4.96944
IPI00889783;IPI00889572	Cysteine and histidine-rich protein 1	CYHR1	5	5	12.7	40.703	362	5.1288e-33	1.01625	0.917179	1.18927		0.529437		0.200252	0.262309	0.520996
IPI00218839;IPI00871435;IPI00552572	Cytochrome P450 1A1	CYP1A1	3	3	8.8	58.165	512	8.2298e-07
IPI00003451;IPI00742001;IPI00938262	Cytochrome P450 1B1	CYP1B1	19	19	44	60.845	543	3.3305e-164	0.363716	0.505868		1.06714	2.20109	13.3601	0.256951	0.263449
IPI00010218	Putative uncharacterized protein CYP20A1	CYP20A1	7	1	20.7	49.533	435	8.3344e-50	1.08128	0.52203	0.589588		0.618276	1.35676	0.606097	0.733084	1.1664
IPI00019411	Cytochrome P450 2J2	CYP2J2	3	3	10.8	57.61	502	1.173e-06					4.59369
IPI00164018;IPI00396661	Cytochrome P450 2S1	CYP2S1	5	5	11	62.23	564	1.5062e-12	11.3088		34.6945
IPI00307483;IPI00470536	Cytochrome P450 4F11	CYP4F11	4	3	11.3	60.197	524	3.4225e-15							2.03907	4.34009	3.6092
IPI00289171;IPI00002370;IPI00298792;IPI00641662;IPI00909227	Cytochrome P450 4F12	CYP4F12	2	1	5.3	60.309	524	7.2248e-06
IPI00295772;IPI00925291;IPI00926839;IPI00926620;IPI00926468	Lanosterol 14-alpha demethylase	CYP51A1	17	17	37.1	57.278	509	0	1.36243	1.79192	0.84168	1.23922	2.37586	1.41417	4.4843	6.56728	0.651975
IPI00299219;IPI00909871;IPI00006273	Protein CYR61	CYR61	12	12	32.5	42.026	381	4.0431e-69	12.9249		21.6812				34.802	12.0833	4.04531
IPI00015228;IPI00908336;IPI00910648;IPI00013892;IPI00216718;IPI00936565;IPI00478608;IPI00328228;IPI00395879;IPI00853301;IPI00903229;IPI00853361;IPI00556147;IPI00878363;IPI00852732;IPI00852664;IPI00878487	Cytohesin-2	CYTH2	3	3	7	46.546	400	0.00038594	3.23729	2.38158	2.39458			2.58258	2.2407		1.99593
IPI00178072;IPI00744837;IPI00879449;IPI00879862	Cytospin-A	CYTSA	6	6	6	124.59	1117	9.7973e-15			4.31574	1.41669					1.16523
IPI00166642;IPI00871210;IPI00883619;IPI00893605;IPI00893732	D-2-hydroxyglutarate dehydrogenase, mitochondrial	D2HGDH	2	2	5.8	56.415	521	4.5434e-05					1.09259
IPI00337800;IPI00337801;IPI00337802	Disheveled-associated activator of morphogenesis 1	DAAM1	7	7	7.3	123.47	1078	3.5367e-30			3.56392			1.87463			1.5795
IPI00179438;IPI00219298	Disabled homolog 2	DAB2	4	4	7.3	82.447	770	6.6555e-11			11.0312
IPI00789361;IPI00914911;IPI00646394;IPI00045600;IPI00878837;IPI00872792	Disabled homolog 2-interacting protein	DAB2IP	9	9	11	131.62	1189	3.1443e-79							6.75584	14.9254	5.08647
IPI00009407	Dolichyl-diphosphooligosaccharide--protein glycosyltransferase subunit DAD1	DAD1	3	3	28.3	12.497	113	4.1094e-39	2.38681	0.968242	1.33683	1.00995	2.8936	1.53142	0.829325	0.750075	1.68101
IPI00028911;IPI00910536;IPI00924621;IPI00927942;IPI00925319	Dystroglycan	DAG1	18	18	26.9	97.44	895	2.64e-176	2.88043	2.89251	1.94273	1.12472	1.56974	0.730674	0.34522		0.335064
IPI00385987;IPI00926351;IPI00927759;IPI00909319;IPI00927234;IPI00911108;IPI00910414;IPI00785012	Sn1-specific diacylglycerol lipase beta	DAGLB	13	13	22.6	73.731	672	5.028e-98	0.279455	0.365938	0.333311	0.926269	0.642715	0.78883	0.396087	0.486452	0.690226
IPI00551024;IPI00942691	Bifunctional ATP-dependent dihydroxyacetone kinase/FAD-AMP lyase (cyclizing)	DAK	23	23	52	58.977	575	0	0.32175	0.305988	0.336078	0.400529	0.30049	0.4638	0.263213	0.306485	0.464317
IPI00018120;IPI00910684	28S ribosomal protein S29, mitochondrial	DAP3	18	18	43.2	45.566	398	6.2222e-294	0.624025	0.570028	0.688231	1.85443	1.49116	1.55318	0.532226	0.647375	0.718494
IPI00033388;IPI00746243	Death-associated protein kinase 2	DAPK2	2	1	8.4	42.898	370	0.0006197
IPI00015213;IPI00807379	Death-associated protein kinase 3	DAPK3	3	2	5.7	52.535	454	3.378e-07			7.22543				9.89022		5.89484
IPI00004301;IPI00384620;IPI00908645	Dual adapter for phosphotyrosine and 3-phosphotyrosine and 3-phosphoinositide	DAPP1	4	4	21.4	32.044	280	0.00071345							12.5766
IPI00216951;IPI00917615;IPI00917783;IPI00917492;IPI00917920;IPI00917399	Aspartyl-tRNA synthetase, cytoplasmic	DARS	35	35	71.9	57.136	501	0	1.40517	1.11684	1.33501	0.82122	0.803923	1.02129	1.38019	1.55448	1.34088
IPI00100460;IPI00843782	Aspartyl-tRNA synthetase, mitochondrial	DARS2	20	20	36.7	73.562	645	3.2065e-163	1.49553	1.20075	1.5897	5.26981	4.14577	5.9446	1.52716	2.46719	2.96674
IPI00894417;IPI00646625;IPI00876958	Transporter 1 ATP-binding cassette sub-family B (MDR/TAP)	DASS-67H14.3-001	6	6	13.2	87.175	808	1.6321e-149	1.21816	1.23744			0.368392		1.46565	1.17067	2.07374
IPI00915456;IPI00170867;IPI00220885;IPI00642750;IPI00640563	cDNA FLJ77778, highly similar to Homo sapiens death-associated protein 6 (DAXX), mRNA	DAXX	3	3	5.7	82.875	752	2.8604e-05			1.1152	1.06176			1.48887
IPI00165230;IPI00335930	DAZ-associated protein 1	DAZAP1	9	9	29.5	43.383	407	5.4098e-159	1.89879	1.64606	2.01772	1.29879	1.36465	1.66384	1.35281	1.1593	1.38314
IPI00010182;IPI00922055;IPI00921830;IPI00218836;IPI00815745	Acyl-CoA-binding protein	DBI	8	8	78.2	10.044	87	2.4834e-89	0.279236	1.38635	0.83949	1.03581	8.25491	1.54228	0.64222	0.0723798	1.26778
IPI00794221;IPI00003406;IPI00295624	Putative uncharacterized protein DBN1	DBN1	12	12	21.9	76.299	695	5.2006e-74	5.06406	4.97117	8.85975		1.55436	3.94073	2.08738		5.74086
IPI00101968;IPI00396437;IPI00925098;IPI00910949;IPI00924475;IPI00910112;IPI00925926;IPI00924873;IPI00925506;IPI00926332;IPI00924490;IPI00926516;IPI00926741	Drebrin-like protein	DBNL	14	2	43.5	49.042	439	1.2206e-257	1.2199	1.10533	1.38133	0.798085	0.981258	1.02482	1.62625	1.91843	1.97075
IPI00456925	Drebrin-like protein	DBNL	13	1	39.5	48.207	430	3.5701e-243			1.23197
IPI00305545;IPI00790744;IPI00787976	Lariat debranching enzyme	DBR1	7	7	13.4	61.554	544	9.6149e-26	0.973615	0.867528	1.02063	0.45977	0.359221	0.430663	0.424791	0.488138	0.402982
IPI00003944;IPI00644810	Lipoamide acyltransferase component of branched-chain alpha-keto acid dehydrogenase complex, mitochondrial	DBT	12	12	28.4	53.486	482	1.6336e-113	1.68936	0.967492	1.74325	4.50958	3.40067	4.82462	1.21678	1.79879	3.15726
IPI00291417;IPI00015737	Dephospho-CoA kinase domain-containing protein	DCAKD	7	7	26.8	26.55	231	2.4057e-44	0.988826		1.31877	1.55741	0.539171		0.791014	1.1525	1.76944
IPI00337612;IPI00872383;IPI00550954	Discoidin, CUB and LCCL domain-containing protein 1	DCBLD1	2	2	6.3	77.92	715	3.0745e-23	1.12779
IPI00433138;IPI00419836;IPI00894192;IPI00185191;IPI00796292;IPI00793031;IPI00382681	Discoidin, CUB and LCCL domain-containing protein 2	DCBLD2	6	6	11.3	86.656	789	3.922e-47			3.76619				17.2304	9.80681	12.6994
IPI00027547;IPI00847793	Dermcidin	DCD	2	2	29.1	11.284	110	0.00032804								9.06536
IPI00300567;IPI00398758;IPI00383752	3,2-trans-enoyl-CoA isomerase, mitochondrial	DCI	9	9	37.7	32.816	302	0	0.382029	0.433013	0.615309	1.34419	0.635163	1.00903	0.295596	0.478011	0.546866
IPI00020454	Deoxycytidine kinase	DCK	5	5	15.4	30.518	260	0.00012071	1.43823			0.830496	0.926097	0.83167	0.868056	1.20575	0.692042
IPI00004560;IPI00217247;IPI00644293	Serine/threonine-protein kinase DCLK1	DCLK1	1	1	1.5	82.223	740	2.4065e-07
IPI00164672;IPI00795655;IPI00795165	mRNA-decapping enzyme 1A	DCP1A	6	6	14.6	63.436	584	4.645e-74	0.683293	0.83619	0.975229		0.39744	0.71664	0.779302	0.628891	0.814465
IPI00328309;IPI00871404;IPI00910493;IPI00794202;IPI00792577	mRNA-decapping enzyme 1B	DCP1B	3	3	7.6	67.85	618	5.6849e-13	0.365537	0.486287		0.626488	0.445058				0.484426
IPI00292382;IPI00440151	mRNA-decapping enzyme 2	DCP2	2	2	8.3	48.423	420	0.0010243
IPI00335385	Scavenger mRNA-decapping enzyme DcpS	DCPS	14	14	45.4	38.608	337	0	1.24978	1.07537	1.31704	0.948047	0.744602	1.0704	0.957488	0.958405	0.953471
IPI00554705;IPI00296863;IPI00910904	dCMP deaminase	DCTD	7	7	55.6	21.014	189	5.7039e-58	0.722282	0.671456		1.62973	0.275687		1.95244	2.11968	3.08062
IPI00935906;IPI00916757;IPI00872359;IPI00873712;IPI00029485;IPI00917681;IPI00914026;IPI00219114;IPI00917166;IPI00465112;IPI00555695;IPI00917852;IPI00917189;IPI00916359;IPI00917045;IPI00916125;REV_IPI00401138;IPI00916478	cDNA FLJ56465, highly similar to Dynactin-1	DCTN1	50	49	51.3	138.75	1253	0	2.18331	1.74001	2.23599	0.896781	0.895496	0.88968	1.67988	1.86912	2.17599
IPI00220503;IPI00789792;IPI00791846;IPI00789999;IPI00789063;REV_IPI00018829;REV_IPI00217047;REV_IPI00217048;REV_IPI00939892;REV_CON_00697851;REV_CON_00009867;REV_IPI00009867;REV_CON_00139301;REV_IPI00796776;REV_CON_IPI00005859;REV_IPI00005859;IPI00939241;IPI00873617;IPI00940520;REV_CON_IPI00306959;REV_IPI00306959;REV_CON_IPI00847342;REV_IPI00847342;IPI00445804;REV_IPI00792841;REV_IPI00793572;IPI0…	Dynactin subunit 2	DCTN2	20	19	59.9	44.819	406	0	2.16132	2.14128	2.26891	0.87943	0.99226	0.966464	1.7368	1.86539	2.09991
IPI00027014;IPI00514971;IPI00013654;IPI00385809;IPI00747408;IPI00786988;IPI00787934;IPI00787988;IPI00016475;IPI00790994;IPI00472363;IPI00377137;IPI00739611;IPI00788140;IPI00746207;IPI00793327;IPI00788644;IPI00791424;IPI00240375;IPI00479557;REV_IPI00414202;IPI00879648;REV_IPI00216128;REV_IPI00220315	Dynactin subunit 3	DCTN3	7	6	30.6	21.119	186	2.3171e-14		1.78977	2.03422	0.885269		0.972479	1.67856		2.32607
IPI00914016;IPI00550852;IPI00914006;IPI00910858	Dynactin subunit 4	DCTN4	8	8	21.4	53.151	467	3.3387e-74	1.25304	1.21036	1.242	1.13695	1.36251	1.13643	1.98106	1.9002	2.86607
IPI00032498;IPI00909903	Dynactin subunit 5	DCTN5	3	3	17.6	20.126	182	2.5539e-23	0.947598			1.13792	1.29077
IPI00220770;IPI00791750	Dynactin subunit 6	DCTN6	2	2	14.7	20.747	190	3.6547e-08							1.61114		1.6176
IPI00012197	dCTP pyrophosphatase 1	DCTPP1	11	11	57.6	18.681	170	5.0969e-150	0.55142	0.557693	0.657765	0.523588	0.437178	0.601721	0.344982	0.397078	0.38398
IPI00291893;IPI00910838;IPI00749447	DCN1-like protein 1	DCUN1D1	10	10	39	30.124	259	1.6508e-180	0.85492	0.785546	0.899847	0.812018	0.554109	0.76864	0.548155	0.464339	0.617894
IPI00641124;IPI00941798;IPI00872299;IPI00385380	cDNA FLJ55777, highly similar to DCN1-like protein 4	DCUN1D4	3	2	8	38.382	336	2.582e-05	1.23267	1.32788	1.24267				0.592171
IPI00165361	DCN1-like protein 5	DCUN1D5	5	4	20.3	27.508	237	6.3094e-18	1.13285	0.913159	0.915751	0.843739	0.948677	0.993443	0.64813	0.703581	0.486263
IPI00797917;IPI00448095;IPI00797249;IPI00790455;IPI00789087;IPI00796620	L-xylulose reductase	DCXR	16	16	81	25.728	242	0	0.50844	0.305288	0.492854	1.73031	2.20721	2.13074	0.136679	0.145724	0.150412
IPI00220342;IPI00910124	N(G),N(G)-dimethylarginine dimethylaminohydrolase 1	DDAH1	15	14	57.2	31.121	285	1.3116e-208	5.68925	5.52822	8.87626	2.56772	2.81468	4.33088	1.24434	0.824946	1.29808
IPI00000760;IPI00647695;IPI00797462;IPI00645821;IPI00646524	N(G),N(G)-dimethylarginine dimethylaminohydrolase 2	DDAH2	8	7	38.9	29.644	285	2.9253e-280	0.997904	0.94679	1.59939	0.931793	0.616789	1.12284	0.210314	0.208829	0.263727
IPI00293464;IPI00909008;IPI00909251;IPI00909177;IPI00922069	DNA damage-binding protein 1	DDB1	55	55	50.1	126.97	1140	0	0.609385	0.5997	0.55054	0.893815	1.04145	0.810898	0.74912	0.83682	0.5973
IPI00021518;IPI00446284;IPI00549348;IPI00607727;IPI00607674	DNA damage-binding protein 2	DDB2	10	10	32.8	47.863	427	1.1841e-88	0.255735	0.292937	0.246409	0.555895	0.560381		0.819135	0.998104
IPI00376941;IPI00848041;IPI00794129;IPI00376942	Phospholipase DDHD1	DDHD1	4	4	5.6	100.43	900	2.9161e-08		0.753125					0.506073	0.38906	0.85317
IPI00871731;IPI00304761	Phospholipase DDHD2	DDHD2	2	1	3	81.031	711	1.4333e-06
IPI00031618;IPI00845258;IPI00796836	Protein DDI1 homolog 2	DDI2	7	7	18.4	46.571	419	1.4156e-92	0.435749	0.426185	0.553802	0.797639	0.684978	1.00028	0.770891	1.01157	1.24048
IPI00550489	DNA-damage-inducible transcript 4 protein	DDIT4	1	1	5.6	25.37	232	4.8196e-06
IPI00297084;IPI00910419	Dolichyl-diphosphooligosaccharide--protein glycosyltransferase 48 kDa subunit	DDOST	18	18	56.8	50.8	456	1.3884e-289	1.48787	1.28811	1.38282	1.45089	1.50707	1.34895	1.04805	1.31832	1.33962
IPI00657861;IPI00001477;IPI00219996;IPI00925878;IPI00922197;IPI00910318;IPI00796394;IPI00789128;IPI00789817;IPI00939463;IPI00790169;IPI00790861;IPI00941821	Discoidin domain receptor family, member 1	DDR1	5	5	6.7	101.8	919	1.8546e-24		0.717566		1.234			0.560601	0.787216
IPI00028387;IPI00942981;IPI00375407;IPI00432026	DDRGK domain-containing protein 1	DDRGK1	8	8	34.1	35.61	314	1.0113e-175	0.838153	0.665513	0.957213	2.28697	2.99321	1.94065	0.794344	0.750075	1.44907
IPI00878984;IPI00293867;IPI00909853;IPI00894562;IPI00472043;IPI00913936;IPI00894440;IPI00787049;IPI00893737	D-dopachrome decarboxylase	DDT	10	10	56.8	14.192	132	1.3848e-166	1.78148	1.74426	1.75101	1.61645	2.78909	2.91435	0.839913	1.07492	1.04503
IPI00293655	ATP-dependent RNA helicase DDX1	DDX1	42	42	55.7	82.431	740	0	1.17441	1.18704	1.20272	0.85034	0.834655	0.988142	1.01326	0.94688	1.06883
IPI00297900;IPI00908600	Probable ATP-dependent RNA helicase DDX10	DDX10	7	7	8.9	100.89	875	6.6664e-20			0.687332	1.67555		1.44511			0.649266
IPI00940000;IPI00889541;IPI00651653;IPI00651677;IPI00023785;IPI00941799;IPI00879638	DEAD box polypeptide 17 isoform p82 variant	DDX17	40	26	57.6	80.457	731	0	1.51284	1.37694	1.46856	1.57749	1.76038	1.53733	0.909504	0.988924	0.809717
IPI00301323;IPI00657846;IPI00555700	ATP-dependent RNA helicase DDX18	DDX18	16	16	29.7	75.406	670	2.5991e-71	1.9002	1.9699	0.976086	1.68299		1.04106	0.90465	0.575473	0.50971
IPI00019918;IPI00155054;IPI00296139;IPI00759454	ATP-dependent RNA helicase DDX19A	DDX19A	20	4	37	53.974	478	4.3843e-229	0.745212	0.723014	0.739973	0.415645	0.397994	0.468406	0.835841	0.732654	0.742335
IPI00008943;IPI00939593;IPI00027599;IPI00556368;IPI00556256;IPI00922879;IPI00329577;IPI00219940;IPI00644955	ATP-dependent RNA helicase DDX19B	DDX19B	18	2	37	53.926	479	6.2012e-196
IPI00005904	Probable ATP-dependent RNA helicase DDX20	DDX20	16	16	26.7	92.239	824	3.4781e-79	0.447267	0.538126	0.421692	0.898715	0.981451	0.944376	0.703383	0.427095	0.380011
IPI00015953;IPI00477179	Nucleolar RNA helicase 2	DDX21	37	34	47.8	87.343	783	0	1.3711	1.75193	0.929454	2.77062	1.26041	1.35992	1.38336	0.580585	0.387027
IPI00006725;IPI00903057	Probable ATP-dependent RNA helicase DDX23	DDX23	27	22	36	95.581	820	1.7838e-100	0.545137	0.518162	0.633473	1.16225	1.22117	1.08126	0.531265	0.345519	0.517143
IPI00006987;IPI00923556;IPI00911118;IPI00910382;IPI00000207	ATP-dependent RNA helicase DDX24	DDX24	20	20	27.2	96.331	859	1.3502e-88	0.216549	0.327204	0.309953	1.40142	0.73078	0.922254	0.451121	0.26191	0.280749
IPI00293078	Probable ATP-dependent RNA helicase DDX27	DDX27	17	17	22.6	89.834	796	4.8433e-82	1.62143	0.567408	0.818599	1.36771	0.831393	1.13908	0.564048		0.530842
IPI00020050	Probable ATP-dependent RNA helicase DDX28	DDX28	3	3	4.4	59.55	540	2.2133e-06		0.946163	0.870095			2.07112	0.959785		0.500826
IPI00043990;IPI00844181;IPI00291296;IPI00552716;IPI00552374;IPI00910952	Probable ATP-dependent RNA helicase DDX31	DDX31	7	7	10.9	94.086	851	5.5436e-15		0.484027	0.545673	1.69506		1.16252	0.86103	2.73232	0.373497
IPI00940237;IPI00644431;IPI00166874;IPI00062206;IPI00910317;REV_IPI00149849;REV_IPI00871406;REV_IPI00294999	ATP-dependent RNA helicase DDX39	DDX39	26	9	66	49.129	427	0	1.25729	1.50918	1.20661	1.29611	0.589379	1.09948	0.432283	0.299769	0.324739
IPI00215637;IPI00910433;IPI00293616;IPI00908506;IPI00647597;IPI00909544;IPI00646152;IPI00909282;IPI00071483;IPI00456933	ATP-dependent RNA helicase DDX3X	DDX3X	36	35	55	73.243	662	0	0.601431	0.643211	0.663878	1.03044	1.16735	0.857339	0.960246	0.800512	0.761557
IPI00007208	Probable ATP-dependent RNA helicase DDX41	DDX41	15	15	25.1	69.837	622	7.5505e-35	0.776398	0.812282	0.689893	0.655738	0.810373	0.729554	0.497562	0.341111	0.314179
IPI00409671;IPI00829889	ATP-dependent RNA helicase DDX42	DDX42	30	30	46.6	102.97	938	0	2.00779	1.86703	1.5685	1.47482	2.62881	1.68226	1.32795	0.98668	0.759071
IPI00939523;IPI00329791	Probable ATP-dependent RNA helicase DDX46	DDX46	37	36	38.7	117.46	1032	0	1.16144	1.20008	0.991179	1.50017	1.47469	1.32256	0.779423	0.751315	0.629644
IPI00023972;IPI00397372;IPI00792829;IPI00792278;IPI00795631;IPI00794506	Probable ATP-dependent RNA helicase DDX47	DDX47	9	9	23.1	50.646	455	7.1714e-122	0.747272	0.975515	0.546448	0.987069	0.9802	0.733353	1.01252	0.75466	0.381098
IPI00003739;IPI00012192;IPI00641167	Probable ATP-dependent RNA helicase DDX49	DDX49	5	5	13.3	54.226	483	1.0106e-10	0.626645		0.498803	0.739317	1.07399	0.732869	0.627628	0.547465	0.385609
IPI00017617;IPI00798375	Probable ATP-dependent RNA helicase DDX5	DDX5	42	32	58.1	69.147	614	0	0.945448	1.76825	0.906618	1.15495	1.79414	0.815395	1.41625	0.908183	0.407183
IPI00031554	ATP-dependent RNA helicase DDX50	DDX50	9	6	16.7	82.564	737	7.0374e-91			0.904895	1.47223		1.17034	1.4095		0.775494
IPI00217541;IPI00871397	ATP-dependent RNA helicase DDX51	DDX51	4	4	6.9	72.456	666	1.8667e-26			1.47152						0.658371
IPI00032423;IPI00394982	Probable ATP-dependent RNA helicase DDX52	DDX52	6	6	11	67.465	599	3.8546e-34			0.599053			0.870474			1.04398
IPI00152510;IPI00879999;IPI00797938;IPI00031637	ATP-dependent RNA helicase DDX54	DDX54	18	18	23.8	98.665	882	7.6083e-62			0.578102	2.50746		0.933532	0.805477		0.409685
IPI00185361;IPI00791512;IPI00657777;IPI00790802;IPI00789648;IPI00939441	ATP-dependent RNA helicase DDX55	DDX55	5	5	10.3	68.488	600	3.5978e-28	1.39429	0.970403	1.20683	1.96564	1.10561	1.91832	0.537779		0.42123
IPI00302281;IPI00925037;IPI00925339;IPI00926269;IPI00925990;IPI00924551;IPI00925260	Probable ATP-dependent RNA helicase DDX56	DDX56	13	13	28.5	61.589	547	4.8745e-86	0.722752	0.755915	0.588235	1.248	0.778695	0.660153	1.07606	0.416476	0.381869
IPI00654731;IPI00295503	Probable ATP-dependent RNA helicase DDX58	DDX58	12	12	14.4	106.6	925	1.2587e-75	11.9144	10.222	12.1098			9.35191
IPI00217157;IPI00010449;IPI00514037	Probable ATP-dependent RNA helicase DDX59	DDX59	2	2	4	68.809	619	0.0047897							0.763242
IPI00030320	Probable ATP-dependent RNA helicase DDX6	DDX6	25	25	63.8	54.416	483	0	0.841397	0.727537	0.996512	0.963113	0.676133	0.772141	0.642797	0.542977	0.548667
IPI00003482;IPI00789705	2,4-dienoyl-CoA reductase, mitochondrial	DECR1	13	13	47.2	36.067	335	2.7745e-301	2.03978	1.47855	2.76832	4.22297	2.88193	3.85	0.760341	1.04681	1.90665
IPI00010190;IPI00640806;IPI00444050;IPI00940905;IPI00894182;IPI00790565;IPI00856119;IPI00877954	Peroxisomal 2,4-dienoyl-CoA reductase	DECR2	6	6	20.2	30.777	292	9.0788e-75	0.126196			1.06865	0.481556	1.14626	0.276266
IPI00004290;IPI00607869	Digestive organ expansion factor homolog	DEF	9	9	13.4	87.054	756	5.252e-09			1.34382	1.36827	2.17979	2.11564			0.810241
IPI00004924;IPI00783066;IPI00853432;IPI00419958;IPI00935400	Differentially expressed in FDCP 6 homolog	DEF6	6	6	10	73.91	631	2.1099e-14			1.87157						2.18871
IPI00410572;IPI00930114;IPI00885026;IPI00930505;IPI00643626	Differentially expressed in FDCP 8 homolog	DEF8	1	1	2.7	58.71	512	0.0064266
IPI00021147	Sphingolipid delta(4)-desaturase DES1	DEGS1	5	5	16.1	37.866	323	3.9825e-55			0.926269		32.0328	11.2242	6.08828
IPI00020021;IPI00942944;IPI00909779;IPI00425937	Protein DEK	DEK	17	17	33.9	42.674	375	8.8089e-165	1.15507	1.30125	0.777122	0.507898	0.516956	0.511928	0.813603	1.81251	0.408998
IPI00921122;IPI00396063	C-myc promoter-binding protein	DENND4A	4	4	3.2	213.77	1907	0.00019872							1.0447
IPI00847759	DENN domain-containing protein 4B	DENND4B	1	1	1.7	163.84	1496	9.4271e-06
IPI00746398;IPI00100453;IPI00386049;IPI00514187;IPI00856026;IPI00478744	DENN domain-containing protein 4C	DENND4C	7	7	5.4	186.85	1673	2.0985e-32	1.44146	1.90078	3.39939	2.37203	2.35183	2.8422		1.89934
IPI00940755;IPI00306280;IPI00909445	Density-regulated protein	DENR	9	9	38.5	22.334	200	3.6359e-222	1.26566	1.0659	1.54252	0.966744	0.920217	1.66378	0.740741	0.950029	1.16874
IPI00426066;IPI00937821;IPI00005665;IPI00479194;IPI00514024;IPI00619975;IPI00908356	DEP domain-containing protein 5	DEPDC5	1	1	1.4	181.26	1603	0.00023236
IPI00908855;IPI00290560	cDNA FLJ52958, highly similar to Homo sapiens DEP domain containing 6 (DEPDC6), mRNA	DEPDC6	3	3	14.6	33.978	308	3.0302e-06				5.31547	1.74892
IPI00219677;IPI00791500;IPI00789397;IPI00792937	Putative deoxyribose-phosphate aldolase	DERA	9	8	38.4	35.23	318	6.7421e-108	0.756773	0.818934	1.14321	0.634156	0.456475		0.775555	1.0005	1.14982
IPI00013271;IPI00902975;IPI00909815;IPI00940349	Derlin-1	DERL1	5	5	21.9	28.8	251	9.5019e-39	0.436796	0.560067	0.528067	0.693866	1.05858	0.540657	0.404367	0.320595	0.346368
IPI00304264	Derlin-2	DERL2	1	1	12.6	27.567	239	4.341e-07
IPI00829707;IPI00328185;IPI00877109;IPI00402148;IPI00383650	Dermal papilla-derived protein 6	DERP6	2	2	13.3	35.692	323	1.4766e-36
IPI00465084	Desmin	DES	8	2	11.3	53.535	470	2.2396e-53			0.366502						2.61493
IPI00010882;IPI00604566	DNA fragmentation factor subunit alpha	DFFA	11	11	37.8	36.521	331	8.6232e-168	0.729022	0.809979	0.772022	0.596944	0.45438	0.371181	1.07208	1.19327	1.45262
IPI00029656;IPI00218265;IPI00916340;IPI00917302;IPI00917746;IPI00916467	Non-syndromic hearing impairment protein 5	DFNA5	11	11	31.2	54.554	496	1.191e-96							153.254	55.1724	60.35
IPI00015799	Diacylglycerol O-acyltransferase 1	DGAT1	2	2	8.2	55.278	488	1.8367e-73					6.18085
IPI00333143;IPI00796290;IPI00644617;IPI00942306;IPI00102417	Diacylglycerol kinase alpha	DGKA	21	21	39.6	82.671	735	5.2342e-260							45.3988	37.3134	10.337
IPI00003293;IPI00382834	Diacylglycerol kinase epsilon	DGKE	4	4	8.8	63.926	567	4.1512e-49	1.78002		1.7133			1.55405			0.717721
IPI00745381;IPI00329264;IPI00759622	Diacylglycerol kinase eta	DGKH	3	3	3.6	134.86	1220	2.0964e-09	0.886446						1.32988		2.30261
IPI00013835;IPI00398065;IPI00300125;IPI00867551;IPI00556127;IPI00922452;IPI00869055	Diacylglycerol kinase zeta	DGKZ	2	2	2.6	124.13	1117	0.002894			0.591891						1.10172
IPI00004461;IPI00221320;IPI00221318;IPI00221317;IPI00221319	Deoxyguanosine kinase, mitochondrial	DGUOK	3	3	19.9	32.055	277	8.738e-33		0.741675					0.511065
IPI00016703;IPI00922928;IPI00647760;IPI00922718	24-dehydrocholesterol reductase	DHCR24	20	20	29.5	60.101	516	6.3774e-118	0.425894	0.399712	0.395257	3.62017	5.52334	4.31593	1.39016	1.24796	1.2998
IPI00294501	7-dehydrocholesterol reductase	DHCR7	9	9	19.4	54.489	475	1.0661e-251	0.489165	0.38323	0.514324	0.792644	0.599988	0.856531	0.832293	1.12429	1.16496
IPI00514787;IPI00410097;IPI00922374;IPI00410099;IPI00647181;IPI00514729;IPI00515105	Dehydrodolichyl diphosphate synthase	DHDDS	1	1	2.7	38.785	334	0.00011104
IPI00936284;IPI00030357;IPI00219558	Dihydrofolate reductase	DHFR	10	10	42	28.844	262	2.2312e-138	0.679625	0.913409	0.3707	0.474383		0.216689	0.483489		0.109839
IPI00024462;IPI00607764;IPI00642644	Dihydroorotate dehydrogenase, mitochondrial	DHODH	8	8	27.1	42.867	395	2.9413e-64	0.485555	0.430441	0.458505	0.347596	0.367026	0.473171		0.288984	0.325351
IPI00026829;IPI00215771;IPI00375406;IPI00552707;IPI00911002;IPI00908628	Deoxyhypusine synthase	DHPS	10	10	38.5	40.97	369	1.1813e-273	0.459411	0.66212	0.424376	0.431425	0.466962	0.417519	0.33896	0.320328	0.282119
IPI00065063	Dehydrogenase/reductase SDR family member 1	DHRS1	8	8	27.2	33.909	313	2.0848e-92	0.44831		0.504668				1.85274	2.39223	2.93669
IPI00034280;IPI00658011;IPI00792258;IPI00790844	Dehydrogenase/reductase SDR family member 11	DHRS11	2	2	11.9	28.308	260	0.0080386		0.432732
IPI00059955;IPI00746067;IPI00910665;IPI00790184	Dehydrogenase/reductase SDR family member 13	DHRS13	4	4	14.6	40.848	377	4.851e-26					11.4295	2.98196			0.278118
IPI00376377;IPI00218235;IPI00555608	Dehydrogenase/reductase (SDR family) member 2	DHRS2	3	3	13.7	31.495	300	1.0839e-68		0.375883
IPI00006250;IPI00432717;IPI00641331	Short-chain dehydrogenase/reductase 3	DHRS3	3	3	7.6	33.548	302	0.0067662	2.53801			0.532283					31.4891
IPI00106913;IPI00885050;IPI00719360;IPI00937147;IPI00377198;IPI00376025;IPI00152403;IPI00454647;IPI00376623;IPI00787015;IPI00909027;IPI00885002	Dehydrogenase/reductase SDR family member 4	DHRS4	12	12	38.8	29.537	278	1.1486e-139	0.414388	0.49034	0.536942	0.565771	0.338146	0.523231	0.573559	0.675539	1.1109
IPI00006957;IPI00339238;IPI00470418	Dehydrogenase/reductase SDR family member 7	DHRS7	11	11	38.6	38.298	339	5.2574e-284	1.1748	0.827952	1.52933	0.965251	0.770475	0.942329	1.39206	1.27359	1.92756
IPI00871975;IPI00550165;IPI00790347	Putative uncharacterized protein DHRS7B	DHRS7B	9	9	32.6	35.111	325	1.2588e-188	1.17398	0.938615	1.18064	1.10381	0.843028	1.16862			1.08982
IPI00063408;IPI00640506;IPI00640072;IPI00644967	Probable 2-oxoglutarate dehydrogenase E1 component DHKTD1, mitochondrial	DHTKD1	20	20	35.7	103.04	919	0	0.896539	0.597586	1.00586	1.72049	1.1095	1.61259	0.220863	0.195175	0.253203
IPI00396435	Putative pre-mRNA-splicing factor ATP-dependent RNA helicase DHX15	DHX15	41	40	50.7	90.932	795	0	0.703185	0.53723	0.723014	0.984834	0.692713	0.999001	0.81182	0.727855	0.646245
IPI00552073;IPI00297178;IPI00894081;IPI00644906;IPI00292510;IPI00894447;IPI00789517	Putative pre-mRNA-splicing factor ATP-dependent RNA helicase DHX16	DHX16	11	10	11.2	119.26	1041	2.4169e-72	1.08684	0.880127	0.939232	0.708818	0.618353	0.590702	0.462193	0.328418	0.32173
IPI00217413	ATP-dependent RNA helicase DHX29	DHX29	29	28	26.5	155.23	1369	9.191e-205	0.406405	0.378544	0.286451	0.918527	0.818063	0.61931	0.845023	0.717824	0.614062
IPI00411733;IPI00926109;IPI00477295;IPI00440661;IPI00164906;IPI00795005;IPI00793739;IPI00926295	Putative ATP-dependent RNA helicase DHX30	DHX30	30	1	34	133.94	1194	8.2466e-282	0.850991	0.963484	0.793966	1.21561	1.23478	0.947418	0.688516	0.640205	0.492368
IPI00644447;IPI00334601	Putative pre-mRNA-splicing factor ATP-dependent RNA helicase DHX32	DHX32	3	3	5.7	84.418	743	2.4126e-17	0.803019				1.97153	1.68107
IPI00302860;IPI00943053;IPI00655950	cDNA FLJ56443, highly similar to Putative ATP-dependent RNA helicase DHX33 (EC 3.6.1.-)	DHX33	1	1	1.6	85.209	766	1.3268e-05
IPI00789639;IPI00382739	cDNA FLJ56408, highly similar to Homo sapiens DEAH (Asp-Glu-Ala-His) box polypeptide 34 (DHX34), transcript variant 1, mRNA	DHX34	2	2	2.6	128.12	1143	2.4683e-06
IPI00030288;IPI00642913;IPI00513682;IPI00514896;IPI00909339	Probable ATP-dependent RNA helicase DHX35	DHX35	3	3	5.7	78.909	703	4.0291e-09	1.58917	0.73416	1.62837						0.415334
IPI00027415;IPI00217760;IPI00784170;IPI00896438;IPI00922725	Probable ATP-dependent RNA helicase DHX36	DHX36	22	21	25.3	114.77	1008	5.0993e-143	0.885426	0.831393	0.761267	0.285177	0.25236	0.248293	0.874279	0.685918	0.526759
IPI00217630;IPI00796689	Probable ATP-dependent RNA helicase DHX37	DHX37	5	5	5.9	129.54	1157	4.2594e-40		0.586958		0.824402			0.488544		0.34825
IPI00294211;IPI00909589	Pre-mRNA-splicing factor ATP-dependent RNA helicase PRP16	DHX38	13	13	13.1	140.5	1227	1.9302e-138	0.540278	0.671141	0.577367	0.306007	0.199896	0.21826	0.708215	0.489644	0.340391
IPI00410110;IPI00797226;IPI00789290;IPI00888071	Probable ATP-dependent RNA helicase DHX40	DHX40	7	5	10.5	88.559	779	5.2815e-30	0.509866	0.664452	0.429056						0.264438
IPI00168885;IPI00477424;IPI00749029;IPI00399364	Putative ATP-dependent RNA helicase DHX57	DHX57	7	5	6.8	155.6	1386	1.8464e-32							1.28878		0.840054
IPI00031508	ATP-dependent RNA helicase DHX8	DHX8	8	7	7.2	139.31	1220	1.7461e-17	1.42694		1.04714	0.585377		0.895415	1.24466	1.20878	0.643501
IPI00844578;IPI00921264	ATP-dependent RNA helicase A	DHX9	49	49	41	140.96	1270	0	0.753125	0.642137	0.816593	1.13385	0.560475	0.953016	0.737844	0.628733	0.508958
IPI00008418;IPI00219865;IPI00148255;IPI00789460;IPI00794003;IPI00924568;IPI00924790;IPI00793399	Diablo homolog, mitochondrial	DIABLO	8	8	25.7	35.845	315	5.8159e-46	1.30526	1.04687	1.15802	1.6597	1.71892	2.2899	0.733999	0.975039	1.16592
IPI00852685;IPI00936125;IPI00935307;IPI00924442;IPI00936881;IPI00884341	Protein diaphanous homolog 1	DIAPH1	52	52	45.4	141.35	1272	0	0.967399	0.812414	1.00389	0.585926	0.474428	0.508906	0.880282	0.841043	1.14646
IPI00514914;IPI00514075;IPI00844377;IPI00877079;IPI00844086;IPI00747951	Putative uncharacterized protein DIAPH2	DIAPH2	7	7	7.5	125.62	1103	3.2997e-81	0.68975	0.38506	0.698129		0.371775	0.839842	0.806192	1.03148	1.54421
IPI00789805;IPI00871704;IPI00942390;IPI00794752;IPI00936715;IPI00791213;IPI00791794;IPI00855715;IPI00747250;IPI00655865	Protein diaphanous homolog 3	DIAPH3	5	5	4.2	136.92	1193	2.431e-29	5.07254		5.15677						1.4225
IPI00219036	Endoribonuclease Dicer	DICER1	10	10	7.4	218.68	1922	4.3996e-82	0.668852	0.622432	0.591401	0.871156	1.21405	0.578001	0.813736	1.08717	0.703383
IPI00619921;IPI00249982;IPI00183350;IPI00249984	Death-inducer obliterator 1	DIDO1	9	9	6.7	243.87	2240	6.4283e-53	0.734107	0.702593	1.01053	1.5039	1.6198	1.74304	1.02543	0.56101	0.558067
IPI00004459	Probable dimethyladenosine transferase	DIMT1L	12	12	47.6	35.236	313	3.0871e-48	0.444978	0.514668	0.468911	0.622743	0.288817	0.434594	0.431016	0.247604	0.320718
IPI00878325	Death-inducing-protein	DIP	2	1	10.3	30.012	262	1.6868e-05
IPI00465045;IPI00643040	Disco-interacting protein 2 homolog B	DIP2B	34	30	26.5	171.49	1576	0	1.47639	1.08347	1.50056	1.36679	1.72025	1.53219	0.631194	0.929368	0.673809
IPI00032087;IPI00552729	Disco-interacting protein 2 homolog C	DIP2C	3	1	1.7	170.77	1556	0.00016061				0.887942
IPI00045792;IPI00168349	Disrupted in renal carcinoma protein 2	DIRC2	3	3	10.5	52.087	478	0.0024877									7.2197
IPI00746351;IPI00183462	Exosome complex exonuclease RRP44	DIS3	16	16	18.6	109	958	9.1633e-108	2.02274	1.64485	1.72348	2.03397	1.97398	2.01772	2.62722	2.47249	1.55945
IPI00880048;IPI00217752;IPI00167753;IPI00465384;IPI00385160;IPI00917763	DIS3-like exonuclease 2	DIS3L2	5	2	7.9	99.209	885	1.0617e-41	0.599018	0.633072	0.691611	0.404694	0.414113		1.01183	1.13803	1.04998
IPI00221394;IPI00873935;IPI00874145;IPI00915274;IPI00852712;IPI00852780;IPI00893630;IPI00893397	H/ACA ribonucleoprotein complex subunit 4	DKC1	21	21	46.3	57.673	514	3.4646e-196	0.73443	0.803794	0.845237	3.31983	0.663086	1.62188	0.682501	0.571788	0.764234
IPI00654865;IPI00941011;IPI00925788;IPI00335362;IPI00335360;IPI00410130;IPI00017734	Putative uncharacterized protein DKFZp434G0572	DKFZp434G0572	7	3	5.7	170.44	1572	4.049e-09	4.15472	2.26727		2.22975			1.87389	3.63888	2.01248
IPI00794521;IPI00470483;IPI00654823;IPI00795854;IPI00644445	Putative uncharacterized protein DKFZp434J046	DKFZp434J046	7	7	6.2	166.51	1523	2.4852e-14	6.62866	11.932
IPI00384333;IPI00012966;IPI00384979;IPI00940466	cDNA FLJ52589, highly similar to Transcription factor 12	DKFZp451F163	2	2	6.7	75.844	706	7.3442e-28	2.26014
IPI00000581;IPI00939174;IPI00409750	cDNA FLJ56307, highly similar to Ubiquitin thioesterase protein OTUB1 (EC 3.4.-.-)	DKFZp564E242	15	15	53.9	35.18	308	0	0.587303	0.607903	0.642096	0.737898	0.6182	0.853534	0.716076	0.806712	1.01242
IPI00740961;IPI00893485;IPI00876931;IPI00892889	DKFZP586J0619 protein	DKFZP586J0619	6	6	3.3	266.64	2408	3.3592e-32	1.40762		0.538677	0.641437		1.19231	1.02292		0.443125
IPI00413961;IPI00012885;IPI00793270;IPI00871963;IPI00789953;IPI00749256;IPI00216217;IPI00216218;IPI00797735	cDNA FLJ61553, highly similar to Focal adhesion kinase 1 (EC 2.7.10.2)	DKFZp666O0110	21	21	23.5	121.72	1074	2.0744e-173	0.951746	0.888889	1.03079	1.09937	1.16082	0.981065	0.951022	0.887942	0.996314
IPI00100193;IPI00795469	Alpha- and gamma-adaptin-binding protein p34	DKFZp667D2317	4	4	14.9	34.593	315	1.1374e-94	0.354108	0.4153	0.445712	0.685495		0.759301	0.586304	0.52651	0.648298
IPI00465113;IPI00915852;IPI00916247	cDNA FLJ78298	DKFZp686D0959	9	9	17.4	70.352	621	4.2264e-42	0.725584		0.582411	1.46994	2.1707	1.33704	0.78456	1.33494	1.00947
IPI00027443;IPI00556365;IPI00556541;IPI00789371;IPI00745398	cDNA FLJ54534, highly similar to Homo sapiens cysteinyl-tRNA synthetase (CARS), transcript variant 3, mRNA	DKFZp686F1612	38	4	51.4	94.637	831	0	1.3914	1.0687	1.57948	0.845594	0.8364	1.08546	1.14321	1.73485	1.8318
IPI00465105;IPI00853174;IPI00794825;IPI00925147;IPI00924511	Putative uncharacterized protein DKFZp686G2074	DKFZp686G2074	3	2	8	47.963	426	2.085e-21						3.04155
IPI00552191	Putative uncharacterized protein DKFZp686H16220	DKFZp686H16220	3	2	40.3	8.049	72	1.144e-36	36.3042			469.021			249.781	420.292
IPI00413451;IPI00749398;IPI00513699	cDNA, FLJ95410, highly similar to Homo sapiens serine (or cysteine) proteinase inhibitor, clade B(ovalbumin), member 6 (SERPINB6), mRNA	DKFZp686I04222	21	20	55.3	46.37	409	0	0.434556	0.456433	0.599413	0.666844	0.453186	0.645411	0.733192	0.778574	1.24819
IPI00748891;IPI00166051	Putative uncharacterized protein DKFZp686J1254	DKFZp686J1254	5	5	24.6	26.045	236	9.0297e-37	0.90843		1.20073				0.667245	0.429535	0.576336
IPI00016461;IPI00746030;IPI00925355;IPI00026386	cDNA FLJ75064, highly similar to Homo sapiens phospholipase C, delta 1 (PLCD1), mRNA	DKFZp686K101	11	10	17.9	88.134	777	1.9922e-53	10.9655		10.2763		2.65618		60.4778	44.613	32.1089
IPI00791613;IPI00646909;IPI00792478;IPI00853556	Putative uncharacterized protein DKFZp686L04275	DKFZp686L04275	20	1	37	51.984	467	0
IPI00513827;IPI00895801;IPI00005040	Putative uncharacterized protein DKFZp686M24262	DKFZp686M24262	13	13	35	50.27	454	3.7989e-54	3.13332	2.65456	2.60444	2.84309	2.20293	2.77239	1.5157		2.96577
IPI00418169;IPI00455315;IPI00334627;IPI00903334;IPI00797556;IPI00909509;IPI00795925;IPI00798111	Putative uncharacterized protein DKFZp686P03159	DKFZp686P03159	56	56	92.4	40.411	357	0	10.2099	8.47386	10.8267	1.9906	1.74328	1.44856	24.8626	24.846	33.942
IPI00386243;IPI00103707	DKFZp761E198 protein	DKFZp761E198	1	1	1.5	87.832	821	1.5141e-09						1.21105
IPI00555694;IPI00163337;IPI00828051;IPI00010953	cDNA, FLJ96612, highly similar to Homo sapiens SEC15 (S. cerevisiae)-like (SEC15L), mRNA	DKFZp761I2124	8	7	12	95.347	820	2.7922e-78			1.26146			3.27268
IPI00926440	Putative uncharacterized protein DKFZp761P0818	DKFZp761P0818	9	1	51.6	21.346	182	1.0084e-43
IPI00924549;IPI00470941;IPI00740027;IPI00924479;IPI00924776	Putative uncharacterized protein DKFZp781C0425	DKFZp781C0425	1	1	8.3	14.872	133	3.8404e-06		0.555185		0.339582
IPI00815732	Putative uncharacterized protein DKFZp781N1372	DKFZp781N1372	34	2	74.3	47.958	432	0	2.28943	1.80157	2.10336	0.9176	0.886211	0.959601	0.894134	0.985902	1.01846
IPI00021338;IPI00788836;IPI00908638	Dihydrolipoyllysine-residue acetyltransferase component of pyruvate dehydrogenase complex, mitochondrial	DLAT	19	19	36	68.996	647	5.8509e-229	1.50657	1.15264	1.53076	4.12116	4.48954	5.17277	1.00836	1.19204	1.42939
IPI00218729;IPI00552376;IPI00030351;IPI00552511;IPI00552213;IPI00553029;IPI00552682;IPI00789849;IPI00927180;IPI00926279;IPI00927298;IPI00830135;IPI00927236;IPI00927003;IPI00019213;IPI00790650;IPI00619928;IPI00789794;IPI00030769;IPI00790551;IPI00798304;IPI00790354;IPI00796899;IPI00794349;IPI00790485;IPI00789901;IPI00798030	Disks large homolog 1	DLG1	20	11	27.8	103.32	926	2.4027e-92	0.878426	0.794281	1.03245	1.21573	0.814863	0.669031	0.880049	0.910167	1.0457
IPI00647950;IPI00646771;IPI00444727;IPI00444938;IPI00794641;IPI00794865;IPI00940753;IPI00796686;IPI00942330;IPI00795962	Disks large homolog 2	DLG2	5	1	7.6	109.37	975	2.9631e-28
IPI00552701;IPI00023343;IPI00647338	Discs, large homolog 3 (Neuroendocrine-dlg, Drosophila)	DLG3	10	9	14	93.605	849	1.0187e-66	0.525762	0.578102	0.2815	2.1332	3.60881	0.675219	3.50803	0.486358
IPI00411901;IPI00854821;IPI00514780;IPI00854862	Disks large homolog 5	DLG5	7	7	4	213.87	1919	1.6558e-07			1.34568			1.78565		8.30841	2.89847
IPI00220581;IPI00007138;IPI00411461;IPI00942560;IPI00654770	Disks large-associated protein 4	DLGAP4	6	6	6.9	108.01	992	2.2086e-46	2.14491	1.60254	2.14037	1.44988	1.68327	1.31884	0.944109	0.0441228	1.49047
IPI00647892;IPI00184997;IPI00908946;IPI00647106	Disks large-associated protein 5	DLGAP5	8	8	12.4	95.114	846	3.3308e-30	2.12648	4.92999	1.44059			0.206096	2.16169
IPI00006091;IPI00472316;IPI00304639;IPI00375141;IPI00304638;IPI00220577;IPI00334618;IPI00335579;IPI00376366;IPI00184337;IPI00376375;IPI00872706;IPI00334178;IPI00184813;IPI00376367;IPI00419537;IPI00376374;IPI00647524;IPI00002386	Dystrophin	DMD	4	3	1.2	426.69	3685	4.8926e-05	104.136			35.3757			15.3475	8.71536	0.734214
IPI00296196	Dimethylglycine dehydrogenase, mitochondrial	DMGDH	1	1	2.1	96.806	866	4.6513e-15
IPI00294728;IPI00807343	DmX-like protein 1	DMXL1	5	5	1.8	337.61	3027	7.5154e-10	1.20605			0.695604
IPI00152542	DmX-like protein 2	DMXL2	3	3	1.4	339.71	3037	2.3259e-05
IPI00872980;IPI00888430;IPI00940591;IPI00873976;IPI00186065;IPI00746573	Dynein heavy chain 17, axonemal	DNAH17	7	7	1.4	511.84	4485	0.002298						4.0295
IPI00012535	DnaJ homolog subfamily A member 1	DNAJA1	24	23	62.7	44.868	397	0	0.717463	1.05813	0.666889	0.93362	0.923446	0.611098	0.992753	0.656513	0.364153
IPI00032406	DnaJ homolog subfamily A member 2	DNAJA2	19	19	54.6	45.745	412	1.5637e-201	0.768344	0.77101	0.644164	0.457268	0.446528	0.510803	0.852733	0.741565	0.808669
IPI00294610;IPI00179187;IPI00910442	DnaJ homolog subfamily A member 3, mitochondrial	DNAJA3	16	16	38.5	52.537	480	2.1174e-188	0.314248	0.401268	0.379954	1.70619	1.95944	1.64978	0.30459	0.227051	0.45041
IPI00383360	PRO1472	DNAJA4	2	1	12.9	17.153	155	7.3424e-35
IPI00015947;IPI00910075	DnaJ homolog subfamily B member 1	DNAJB1	21	20	56.2	38.044	340	1.1092e-95	0.68334	0.740576	0.667646	0.760341	0.76746	0.827061	0.975134	0.812282	0.828569
IPI00008454;IPI00927297;IPI00797108	DnaJ homolog subfamily B member 11	DNAJB11	13	13	38	40.513	358	4.428e-206	1.06243	0.900495	1.07577	0.901632	0.992457	0.912492	0.857412	0.58292	1.07202
IPI00939657;IPI00014400	DnaJ homolog subfamily B member 12	DNAJB12	10	10	29.6	41.859	375	1.6316e-27	1.21149	0.589553	0.857927	0.716794	0.987849		0.717515	0.600456	0.476985
IPI00178504;IPI00410274	DnaJ homolog subfamily B member 14	DNAJB14	1	1	3.2	42.515	379	0.0092317
IPI00220102;IPI00874105;IPI00916360;IPI00917047;IPI00908667;IPI00916752;IPI00925711	DnaJ homolog subfamily B member 2	DNAJB2	3	2	14.2	35.58	324	9.6745e-09							6.16371
IPI00003848	DnaJ homolog subfamily B member 4	DNAJB4	2	1	6.5	37.806	337	1.9634e-22
IPI00024523;IPI00556073;IPI00908622;IPI00909891;IPI00927277;IPI00098523;IPI00926867;IPI00910456;IPI00926644;IPI00925657;IPI00103326;IPI00925863;IPI00926246;IPI00103726;IPI00169308;IPI00926057	DnaJ homolog subfamily B member 6	DNAJB6	7	6	28.8	36.087	326	2.7548e-71	4.40296	2.6356	4.47547	2.79135	2.00823	0.96367	0.81586		0.899038
IPI00074870;IPI00645450;IPI00645120	DnaJ homolog subfamily C member 1	DNAJC1	9	9	18.1	63.882	554	3.7641e-40	0.543715	0.717772	0.752106	1.24287	1.21487	1.03236	0.529521	0.633392
IPI00293260;IPI00844115;IPI00873764	DnaJ homolog subfamily C member 10	DNAJC10	17	17	21.7	91.079	793	6.7903e-98	5.5991	3.81476	5.97265	1.28584	1.56529	1.94568	1.63348	1.97309	3.19101
IPI00465290;IPI00333016;IPI00607744;IPI00477887;IPI00027984	DnaJ homolog subfamily C member 11	DNAJC11	16	16	29.2	63.277	559	2.6169e-92	0.828981	2.62923	0.878889	2.32558	6.85401	2.22598	2.16746	2.07297	1.70882
IPI00307259;IPI00830029;IPI00410315	DnaJ homolog subfamily C member 13	DNAJC13	37	37	21.7	254.43	2243	0	0.632031	0.546239	0.639386	0.434764	0.358744		0.847027	1.19005	1.07571
IPI00158847;IPI00643715;IPI00793805;IPI00796374	DnaJ homolog subfamily C member 14	DNAJC14	1	1	3.6	78.568	702	0.0004578
IPI00006433;IPI00759581;IPI00646250;IPI00640786	DnaJ homolog subfamily C member 16	DNAJC16	3	3	4	90.59	782	0.0024461
IPI00018798	DnaJ homolog subfamily C member 17	DNAJC17	5	5	22.7	34.687	304	2.9172e-13			1.09796			1.22167			1.0966
IPI00304306;IPI00795263;IPI00397464;IPI00794191;IPI00795893	Mitochondrial import inner membrane translocase subunit TIM14	DNAJC19	7	7	64.7	12.498	116	3.7265e-94	0.740576	0.511954	0.842105	2.09236		2.38834	0.36062	0.705268	0.902201
IPI00830108;IPI00455199;IPI00924488;IPI00925154;IPI00448317;IPI00925609	DnaJ homolog subfamily C member 2	DNAJC2	16	16	31.9	71.896	621	9.7995e-98	0.582513	0.522411	0.475398	0.785176	0.967492	0.778089	0.438078	0.423801	0.343926
IPI00006713;IPI00166730	DnaJ homolog subfamily C member 3	DNAJC3	12	12	27.8	57.579	504	1.1064e-33	0.854336	0.673673	1.11271		0.981547		1.72783		2.71569
IPI00402231;IPI00023780	DnaJ homolog subfamily C member 5	DNAJC5	7	7	42.9	22.149	198	7.3432e-133	0.981547	1.20279	1.41219		3.57079	2.73486	2.23644		3.98899
IPI00184119;IPI00639806;IPI00872067;IPI00760699	Putative tyrosine-protein phosphatase auxilin	DNAJC6	2	2	2.4	105.67	970	3.3752e-10			5.07537
IPI00329629;IPI00794610;IPI00796506	DnaJ homolog subfamily C member 7	DNAJC7	19	19	39.7	56.44	494	6.2686e-164	0.740741	0.680874	0.711997	0.660546	0.608643	0.647417	1.35444	1.04812	0.941531
IPI00003438	DnaJ homolog subfamily C member 8	DNAJC8	9	9	39.5	29.841	253	5.4812e-17	1.24		1.04306	0.429978		0.40997	0.816327	0.906372	0.66011
IPI00154975;IPI00014718	DnaJ homolog subfamily C member 9	DNAJC9	15	15	41.5	29.909	260	2.7563e-99	1.08664	1.0979	1.19219	0.383289	0.13567	0.299115	0.761905	0.590388	0.63857
IPI00010348;IPI00922554	Deoxyribonuclease-2-alpha	DNASE2	6	6	17.8	39.58	360	1.04e-51		0.217269	0.169397	1.01165	1.66304	1.35739	0.58751	0.821625	0.677599
IPI00401285;IPI00514266	DNL-type zinc finger protein	DNLZ	2	2	12.9	19.204	178	2.0177e-08
IPI00146935;IPI00942042;IPI00235412;IPI00871742;IPI00555883;IPI00037283;IPI00473085;IPI00910662;IPI00909322;IPI00791569;IPI00446579	Dynamin-1-like protein	DNM1L	38	38	65.8	81.876	736	0	2.32547	1.84165	2.42878	1.42066	1.1617	1.72325	3.60386	4.41345	5.30223
IPI00033022;IPI00218889;IPI00514550;IPI00181352;IPI00556437;IPI00942160;IPI00895844;IPI00221332;IPI00480085;IPI00641436;IPI00413140;IPI00887273;IPI00888758;IPI00816287;IPI00657691;IPI00444873;IPI00914615;IPI00445318;IPI00914940;IPI00399414	Dynamin-2	DNM2	38	38	46.3	98.063	870	0	0.752219	0.732977	0.757117	0.906208	0.971534	1.04341	0.900982	0.95511	1.07878
IPI00174025;IPI00480148;IPI00873922;IPI00514447	Dynamin-binding protein	DNMBP	6	6	4.6	177.35	1577	5.3398e-19							6.76178		7.24218
IPI00031519;IPI00220918;IPI00220919	DNA (cytosine-5)-methyltransferase 1	DNMT1	31	30	19.5	189.56	1678	1.9509e-242	0.96302	1.32435	0.703532	0.602591	0.601793	0.313215	0.794976	0.426658	0.132598
IPI00015856;IPI00658215;IPI00658188;IPI00029820;IPI00072257;IPI00658014;IPI00657991;IPI00658049;IPI00333813;IPI00657933	Aspartyl aminopeptidase	DNPEP	20	20	46.5	54.493	493	1.603e-295	0.363016	0.345304	0.484332	0.569282	0.336598	0.571429	0.245755	0.313175	0.47335
IPI00057097;IPI00513998;IPI00939798;IPI00514967;IPI00642460	Deoxynucleotidyltransferase terminal-interacting protein 1	DNTTIP1	4	4	12.8	37.013	329	2.6231e-12	1.82812		0.849762	0.580282
IPI00290410;IPI00921860	Deoxynucleotidyltransferase terminal-interacting protein 2	DNTTIP2	5	5	9.3	90.669	810	6.1345e-21				1.0383					0.886132
IPI00872808;IPI00015286	Putative uncharacterized protein DOCK1	DOCK1	5	3	3	222.66	1931	3.0957e-35	2.57089								3.67215
IPI00411452;IPI00748916	Putative uncharacterized protein DOCK11	DOCK11	4	4	2.6	238.1	2077	1.8661e-37		3.86862	4.48491
IPI00792788;IPI00746684;IPI00917443;IPI00816677;IPI00022449;IPI00916073	Dedicator of cytokinesis protein 5	DOCK5	26	21	17.7	216.23	1880	2.5893e-177	1.31705	0.882924	1.52103	0.66836	1.20619	1.63364	4.37331	5.49602	5.56266
IPI00940115	Dedicator of cytokinesis protein 6	DOCK6	13	1	7.3	229.65	2047	1.6147e-49
IPI00513791;IPI00815633;IPI00183572;IPI00815886;IPI00807434;IPI00816106;IPI00043678	Dedicator of cytokinesis protein 7	DOCK7	20	16	12.3	242.56	2140	3.1116e-151	1.40843	0.969932	1.57458	1.22915	1.63313	1.80437	2.39063	2.81429	2.65661
IPI00797373;IPI00856108;IPI00942335;IPI00657746	Dedicator of cytokinesis protein 8	DOCK8	4	1	2	238.53	2099	4.911e-19
IPI00332567;IPI00873308	Dedicator of cytokinesis protein 9	DOCK9	9	1	6.6	238.84	2093	4.4234e-31	2.82941	2.64019	3.8847	2.41074			2.17879	3.52634	4.53515
IPI00216408;IPI00719015;IPI00940600;IPI00743652;IPI00151888;IPI00911071;IPI00641778;IPI00939997	Dedicator of cytokinesis protein 9	DOCK9	9	1	6	240.36	2102	4.8803e-28
IPI00171856	Deoxyhypusine hydroxylase	DOHH	10	10	51.7	32.904	302	1.4118e-103	1.01091	0.792016	1.46047		0.654536		1.25318	0.744768	1.15726
IPI00329410;IPI00844463	Dolichyldiphosphatase 1	DOLPP1	2	2	13.4	27.03	238	3.0774e-55	0.594636	0.524411		1.17554	0.795925		0.410341		0.517866
IPI00294653;IPI00796463	Protein dopey-2	DOPEY2	27	26	14.6	258.18	2298	0	0.454442	0.320225	0.423352	1.33103	1.22441	1.29167	0.229389	0.198192	0.181107
IPI00023500;IPI00219736;IPI00909196;IPI00394961	UDP-N-acetylglucosamine--dolichyl-phosphate N-acetylglucosaminephosphotransferase	DPAGT1	3	3	7.1	46.089	408	1.0051e-11			0.660677			1.87836	0.273441	0.274657	0.74599
IPI00023322;IPI00908945	Zinc finger protein ubi-d4	DPF2	4	4	14.1	44.155	391	2.0378e-42	1.09281	0.55991	0.79694			0.74366	0.406058		0.694734
IPI00908772;IPI00718991;IPI00868806;IPI00868847	cDNA FLJ55582, highly similar to Homo sapiens DPH1 homolog (DPH1), mRNA	DPH1	3	3	6.2	50.245	453	4.5169e-25		0.47735		1.00678		1.35058	0.677369	0.576568	0.563
IPI00106549;IPI00737502;IPI00908597	Diphthamide biosynthesis protein 2	DPH2	4	4	15.1	52.082	489	6.7223e-22		0.511771
IPI00375824;IPI00074270;IPI00902709;IPI00941449;IPI00375823;IPI00006419;IPI00375822	Diphthine synthase	DPH5	4	4	20.2	33.005	297	4.5659e-12	1.12895	1.10152
IPI00796864;IPI00641116;IPI00022018;IPI00790317	Dolichyl-phosphate mannosyltransferase polypeptide 1, catalytic subunit	DPM1	13	13	51.2	33.349	295	1.651e-103	0.990884	0.705567	0.85419	1.6491	1.40465	1.88434	0.678334	0.801925	1.01257
IPI00297475;IPI00004454	Dolichol-phosphate mannosyltransferase subunit 3	DPM3	2	2	13.1	18.358	168	1.9031e-11		0.679256							0.867453
IPI00020672;IPI00645171	Dipeptidyl-peptidase 3	DPP3	29	29	45.2	82.588	737	0	0.649688	0.599772	0.738062	0.619809	0.628931	0.770357	0.563253	0.612933	0.847386
IPI00296141	Dipeptidyl-peptidase 2	DPP7	14	8	36.6	54.341	492	2.4279e-268	0.773814	0.489285	0.950119	2.43037	3.91512	3.4009	0.211672	0.254123	0.341285
IPI00377128;IPI00412277;IPI00026036;IPI00377129;IPI00795254;IPI00084071;IPI00307553;IPI00791295;IPI00914899;IPI00641172	Dipeptidyl peptidase 8	DPP8	5	4	5	103.36	898	1.4033e-13	1.35993		2.52404			2.21995	1.76202		2.18122
IPI00940180;IPI00604777;IPI00604645	Dipeptidyl peptidase 9	DPP9	21	2	22.9	110.24	971	2.5404e-66	3.03601	2.46463	4.96722	2.74228	3.03979	4.14336	8.92379	10.206	14.6944
IPI00604483;IPI00604694	Dipeptidyl peptidase 9	DPP9	20	1	27.5	95.012	836	5.1985e-72		3.21409
IPI00007461;IPI00924944;IPI00848219	Protein dpy-19 homolog 1	DPY19L1	4	3	9.8	77.318	675	1.8029e-13	1.11189	0.91083					1.30489	1.48063	4.6729
IPI00028109;IPI00893184	Protein dpy-30 homolog	DPY30	6	2	83.8	11.25	99	3.2638e-141	1.41756	4.31518	1.9302	1.04728	3.98073	1.29803	0.743716	0.225301	0.991375
IPI00257508	Dihydropyrimidinase-related protein 2	DPYSL2	24	8	55.6	62.293	572	0	5.33874	4.23012	6.57203	0.196075	0.100464		10.6108	14.9707	16.3516
IPI00883655	Dihydropyrimidinase-like 2 long form	DPYSL2	4	3	29.1	17.865	165	8.6281e-24	7.17875		23.9149
IPI00022388;IPI00514623	Dihydropyrimidinase-related protein 4	DPYSL4	2	2	7.3	61.877	572	7.5562e-08								15.2644
IPI00008991	Protein Dr1	DR1	2	2	21	19.443	176	1.63e-13		1.75334						1.66337
IPI00477494;IPI00003084	Dr1-associated corepressor	DRAP1	5	5	21.2	23.205	212	7.3722e-46		1.36251	1.21755	1.52992		2.00497			0.811557
IPI00031836;IPI00877819;IPI00877958;IPI00878191;IPI00878823	Developmentally-regulated GTP-binding protein 1	DRG1	19	19	57.2	40.542	367	5.7546e-281	2.39498	1.64376	2.1616	1.15614	1.02875	0.996612	0.953743	0.962279	1.04618
IPI00022697;IPI00794194;IPI00556215;IPI00797141;IPI00794224;IPI00910426	Developmentally-regulated GTP-binding protein 2	DRG2	14	14	36	40.746	364	7.4272e-66	0.677828	0.609422	0.697934	0.606281	0.651381	0.785114	0.87108	0.911328	1.08764
IPI00938079;IPI00246058;IPI00797599;IPI00926014;IPI00942087;IPI00924740;IPI00925321;IPI00943244;IPI00924996;IPI00937686;IPI00789478;IPI00798229	cDNA FLJ55458, highly similar to Programmed cell death 6-interacting protein	DRIP4	56	56	63.1	96.771	873	0	2.10793	1.73512	2.10761	1.45281	1.72509	1.72191	2.53511	2.73538	2.7462
IPI00941287;IPI00025846	cDNA FLJ76245, highly similar to Homo sapiens desmocollin 2 (DSC2), transcript variant Dsc2a, mRNA	DSC2	9	1	15.5	101.4	914	2.9426e-107	11.0461		3.19836			1.28087			0.64855
IPI00218928;IPI00031549	Desmocollin-3	DSC3	12	10	17.2	93.453	839	3.6204e-122	14.5998	15.0173	8.20614	2.23164			0.769468		2.35643
IPI00029700;IPI00902996;IPI00791412;IPI00219339;IPI00020366	Down syndrome cell adhesion molecule	DSCAM	2	2	1.1	222.26	2012	0.024851	0.587441
IPI00299884	Sister chromatid cohesion protein DCC1	DSCC1	2	2	6.6	44.825	393	0.00014096	1.38209
IPI00298946;IPI00790720;IPI00789523;IPI00385046;IPI00922353;IPI00790030;IPI00916796	Down syndrome critical region protein 3	DSCR3	4	4	17.8	33.01	297	5.8177e-23	1.52124						1.50462	1.99924	2.86115
IPI00002526	Dermatan-sulfate epimerase	DSE	2	2	2.5	111.82	977	4.1979e-05
IPI00025753	Desmoglein-1	DSG1	2	2	4.6	113.71	1049	0.006365
IPI00028931	Desmoglein-2	DSG2	27	27	35.8	122.29	1118	0	2.94481	3.50275	2.31728	1.03007	1.47003	0.932749	1.49555	1.28016	1.64927
IPI00031547	Desmoglein-3	DSG3	20	20	27.1	107.53	999	0			38.2468					113.304	39.4602
IPI00016580;IPI00827925;IPI00843750;IPI00884119;IPI00641008;IPI00936886	Kinetochore-associated protein DSN1 homolog	DSN1	1	1	3.9	40.067	356	1.8013e-06
IPI00013933;IPI00217182;IPI00746877;IPI00872333;IPI00943025	Desmoplakin	DSP	202	200	63.4	331.77	2871	0	1.82488	1.90089	1.60074	1.60197	4.27844	3.09301	15.825	10.986	2.83447
IPI00217992;IPI00217993;REV_IPI00642186;REV_IPI00902637;REV_IPI00007748;REV_IPI00744116;REV_IPI00791843	Bullous pemphigoid antigen 1, isoforms 1/2/3/4/5/8	DST	62	2	26.3	306.75	2649	0	4.01332	2.86451	8.99766	1.08257	1.10909		16.7524	14.7739	22.0653
IPI00473014;IPI00845388;IPI00935521;IPI00786968;IPI00888288;IPI00788232;IPI00869284	Destrin	DSTN	20	17	93.3	18.506	165	3.328e-252	2.23369	1.75704	1.73506	1.25884	1.50141	1.00679	2.12897	2.38016	1.95971
IPI00152692	D-tyrosyl-tRNA(Tyr) deacylase 1	DTD1	6	6	39.2	23.423	209	2.6123e-111	0.853242	0.717618	0.814863	0.409903	0.372828	0.245339	0.819068	0.772678	1.10064
IPI00643808	Denticleless protein homolog	DTL	2	2	3.2	79.44	730	0.00013685		5.25376
IPI00479571;IPI00328918;IPI00394984;IPI00847171;IPI00940422	Putative uncharacterized protein DTNBP1	DTNBP1	3	3	9.1	39.636	352	3.4852e-08
IPI00328939;IPI00869117;IPI00871824;IPI00103123	DTW domain-containing protein 1	DTWD1	2	2	5.6	35.248	304	0.00037133	0.213292	0.155528	0.272175				0.201199	0.221513
IPI00168209	DTW domain-containing protein 2	DTWD2	2	2	10.4	33.415	298	3.8221e-06	0.220449			0.45635
IPI00377117;IPI00867656;IPI00925715	Protein deltex-2	DTX2	2	1	4.7	62.344	575	5.8802e-13
IPI00152503	Protein deltex-3-like	DTX3L	3	3	6.8	83.553	740	3.0614e-34		0.606355					0.767283
IPI00013862;IPI00787559;IPI00938328;IPI00892966;IPI00892836	Thymidylate kinase	DTYMK	19	19	65.6	23.819	212	7.6718e-155	0.903424	0.875503	1.07784	0.660371	0.383347	0.689132	0.569736	0.545732	0.778089
IPI00335251;IPI00329754	tRNA-dihydrouridine synthase 1-like	DUS1L	6	6	15	53.23	473	9.1229e-54	0.620194	0.40563	0.552303	0.88129	1.0112	1.19811	0.327665		0.194435
IPI00015804;IPI00909876	tRNA-dihydrouridine synthase 2-like	DUS2L	9	9	22.1	55.05	493	7.0327e-53	0.426767	0.532822	0.74217	1.12256	0.479317	0.610389	0.356366	0.508699	0.548155
IPI00784107;IPI00186125;IPI00640947	tRNA-dihydrouridine synthase 3-like	DUS3L	4	4	7.5	72.593	650	4.8764e-71	1.33862	1.14231			1.28366	1.96002	0.699496		0.627077
IPI00026987;IPI00158733	Dual specificity protein phosphatase 10	DUSP10	2	2	6	52.642	482	0.00066757
IPI00020683;IPI00941817;IPI00465012;IPI00925927	RNA/RNP complex-1-interacting phosphatase	DUSP11	1	1	4.2	43.71	377	0.0053728
IPI00009210	Dual specificity protein phosphatase 12	DUSP12	5	5	17.9	37.687	340	3.703e-22	0.860067	1.11571	1.01479				0.638244	0.615726	0.588928
IPI00013031	Dual specificity protein phosphatase 14	DUSP14	2	2	14.1	22.255	198	2.7995e-08									7.09874
IPI00306353	Dual specificity protein phosphatase 23	DUSP23	8	8	67.3	16.588	150	2.0379e-161	0.53268	0.436167	0.520291	0.96043	0.997108	0.877886	0.808865	0.889205	0.875657
IPI00790757;IPI00018671;IPI00796237	Dual specificity protein phosphatase 3	DUSP3	6	6	38.1	23.165	210	1.1423e-131	1.1953	1.05648	1.47907	0.874891	0.748783		1.43559	1.50634	2.12247
IPI00375015;IPI00013679;IPI00749113;IPI00793322;IPI00794545	Deoxyuridine 5'-triphosphate nucleotidohydrolase, mitochondrial	DUT	10	10	69.5	17.748	164	5.5242e-184	1.16724	1.26323	0.852515	0.569736	0.415852	0.294655	0.52356	0.546777	0.169474
IPI00296211;IPI00921973;IPI00853555;IPI00640591	Dymeclin	DYM	2	2	2.7	75.935	669	0.00042528
IPI00456969;IPI00440177;IPI00030618;IPI00914534	Cytoplasmic dynein 1 heavy chain 1	DYNC1H1	271	271	58.5	532.4	4646	0	2.11528	1.50528	2.38141	1.07582	0.96581	1.26994	1.57168	1.94292	2.29521
IPI00302712;IPI00216348;IPI00827813;IPI00744015;IPI00827859;IPI00915993;IPI00917978;IPI00412601;IPI00915884;IPI00917180;IPI00917325;IPI00917685;IPI00916278;IPI00917785;IPI00916160;IPI00917564;IPI00917075;IPI00916306	Cytoplasmic dynein 1 intermediate chain 2	DYNC1I2	17	17	38.3	70.644	632	0	2.07809	1.87624	2.35139	1.01365	1.04587	1.21473	1.76255	2.00128	2.35999
IPI00007675;IPI00927867;IPI00796377	Cytoplasmic dynein 1 light intermediate chain 1	DYNC1LI1	24	4	53.7	56.578	523	1.0001e-206	1.78699	1.71292	2.17283	1.14485	0.926956	1.27755	1.32654	1.33417	1.76532
IPI00011592;IPI00909090;IPI00909455;IPI00470463	Cytoplasmic dynein 1 light intermediate chain 2	DYNC1LI2	16	15	52.2	54.099	492	1.4722e-250	1.54057	1.30514	1.90712	0.726744	0.704722	0.951656	1.65843	1.94262	2.09354
IPI00171494;IPI00788188;IPI00885216	Cytoplasmic dynein 2 heavy chain 1	DYNC2H1	5	5	1.1	493.39	4314	5.9729e-08		2.73853							0.806712
IPI00019329	Dynein light chain 1, cytoplasmic	DYNLL1	7	5	64	10.366	89	3.3464e-261	0.850412	0.835911	0.951565	0.636294	0.765873	0.763592	1.57751		1.14322
IPI00062037	Dynein light chain 2, cytoplasmic	DYNLL2	7	5	64	10.35	89	1.7006e-228	0.959141	1.00381	1.23265	0.900982	0.966744	1.22758	1.35577	0.675493	1.02956
IPI00412497;IPI00910924;IPI00643583;IPI00178188;IPI00385120;IPI00063849	Dynein, light chain, roadblock-type 1	DYNLRB1	5	5	39.2	16.253	148	3.3551e-88	1.63567	2.11851	2.39011	0.583397	1.16255	1.00404	1.39542	1.19126	1.83254
IPI00019495;IPI00479503	Dynein light chain Tctex-type 1	DYNLT1	4	4	60.2	12.452	113	3.592e-185	2.42025	2.14238	2.22975		1.38334	1.87319	1.57178	2.17184	1.96055
IPI00639982;IPI00020885;IPI00644278	Putative uncharacterized protein DYNLT3	DYNLT3	5	5	59.9	16.979	152	3.2964e-99	1.86602	1.7882	2.87687		0.45159				4.02382
IPI00014344;IPI00219250;IPI00219252;IPI00182717;IPI00941492;IPI00219251;IPI00796684;IPI00796059	Dual specificity tyrosine-phosphorylation-regulated kinase 1A	DYRK1A	7	6	16.8	85.583	763	4.7512e-40		0.618697	0.811425		0.958773	2.64068	0.610836		0.750188
IPI00000352;IPI00215873;IPI00332215	Dual specificity tyrosine-phosphorylation-regulated kinase 1B	DYRK1B	2	1	2.7	69.197	629	0.0022951
IPI00890779;IPI00908826;IPI00793867;IPI00908443;IPI00890768;IPI00908936;IPI00910624;IPI00908658;IPI00910445;IPI00908764;IPI00020210;IPI00871702;IPI00911101;IPI00908579;IPI00915417	Dysferlin	DYSF	3	1	1.5	241.35	2119	6.4737e-46
IPI00292880	Transcription factor E2F4	E2F4	2	2	6.5	43.96	413	0.0046384
IPI00184135;IPI00644552;IPI00556439	Transcription factor E4F1	E4F1	1	1	1.9	83.476	784	2.1501e-16
IPI00009373;IPI00515006;IPI00642467;IPI00828199	Chromatin modification-related protein EAF6 homolog	EAF6	1	1	6.5	22.755	201	0.0026564
IPI00019205	Enhanced at puberty protein 1	EAP1	10	7	19.2	82.658	796	2.7972e-153	1.44978	1.02755	0.838223	0.398931	1.70308		0.524191		0.543065
IPI00306299	E2F-associated phosphoprotein	EAPP	1	1	4.9	32.734	285	0.00018708
IPI00642156;IPI00384707;IPI00384503	Probable glutamyl-tRNA synthetase, mitochondrial	EARS2	7	7	21.4	58.688	523	4.7886e-93	0.220483	0.275581	0.211932	0.864753	0.783699	0.921659	0.396165	0.558223	0.501807
IPI00930241;IPI00745955;IPI00910851;IPI00908409	Probable rRNA-processing protein EBP2	EBNA1BP2	10	10	30.5	40.684	361	9.3722e-60			0.847673	1.64704		1.34745			0.511326
IPI00008599;IPI00643669;IPI00642218	3-beta-hydroxysteroid-Delta(8),Delta(7)-isomerase	EBP	2	2	12.2	26.352	230	4.3996e-124	0.625195	0.578972	0.593683	1.16263	1.37686		1.47141	2.14293	2.27004
IPI00913873;IPI00027034;IPI00913859;IPI00644124;IPI00644693	Protein SGT1	ECD	4	4	7.7	76.507	677	6.3107e-88		2.06475					1.88779
IPI00002478;IPI00216762;IPI00216758;IPI00216760;IPI00514800	Endothelin-converting enzyme 1	ECE1	18	18	30.9	87.163	770	3.9808e-198	7.18856	5.77034	8.81834	1.48971	0.991768	1.86213	0.795798	1.05118	0.398724
IPI00472106;IPI00218597	Endothelin-converting enzyme 2	ECE2	3	3	12.5	28.306	255	1.1542e-05
IPI00011416;IPI00908564	Delta(3,5)-Delta(2,4)-dienoyl-CoA isomerase, mitochondrial	ECH1	16	13	56.1	35.816	328	0	1.08698	1.14045	1.22564	2.8247	3.14297	4.17206	0.32872	0.502993	0.732225
IPI00302688;IPI00941904;IPI00550928;IPI00479537;IPI00513761;IPI00645630;IPI00642080;IPI00644982;IPI00872902;IPI00646014;IPI00869269	Enoyl-CoA hydratase domain-containing protein 1	ECHDC1	6	6	28	33.698	307	5.5637e-62								8.86918	7.3654
IPI00024993	Enoyl-CoA hydratase, mitochondrial	ECHS1	15	15	60.3	31.387	290	0	0.757633	0.625078	0.7227	1.86057	1.52057	2.09617	0.470943	0.545822	0.53217
IPI00645849;IPI00003351;IPI00006969;IPI00909747	Extracellular matrix protein 1	ECM1	1	1	3.5	63.563	567	0.005549
IPI00942702;IPI00015315	ECM2 protein	ECM2	3	2	4	78.842	693	0.0032794
IPI00157790;IPI00639848	Proteasome-associated protein ECM29 homolog	ECM29	59	59	36.9	223.69	2017	0	0.909918	0.760052	1.1244	0.76693	0.545256	0.87146	0.64914	0.735024	0.765755
IPI00106506;IPI00063188;IPI00915447	Evolutionarily conserved signaling intermediate in Toll pathway, mitochondrial	ECSIT	5	5	16.7	49.148	431	5.1591e-41	0.534359	0.718288					0.75861	0.703136
IPI00794284;IPI00924778;IPI00748143;IPI00924582;IPI00927485;IPI00927046;IPI00925941;IPI00792396	Protein ECT2	ECT2	6	6	9.8	105.07	927	7.1524e-22		7.49963	1.93043			0.606796	2.3784		0.121287
IPI00152912;IPI00103484;IPI00642058	Ectodysplasin-A receptor-associated adapter protein	EDARADD	5	5	36.1	23.689	205	6.3484e-47					15.3511	31.1468
IPI00018009	Enhancer of mRNA-decapping protein 3	EDC3	8	8	24.2	56.077	508	6.0258e-38	1.37268	1.05453	1.25805	0.894694			0.645745		0.537057
IPI00376317;IPI00641449	Enhancer of mRNA-decapping protein 4	EDC4	33	33	33.8	151.66	1401	0	0.465614	0.482998	0.69056	0.451794	0.212089	0.434802	0.435787	0.372578	0.460363
IPI00009410;IPI00892978;IPI00177388	ER degradation-enhancing alpha-mannosidase-like 3	EDEM3	5	5	8	104.66	932	5.8845e-12					1.5759		0.946701
IPI00021570;IPI00640567;IPI00006362	Endothelial differentiation-related factor 1	EDF1	8	8	46.6	16.368	148	5.9383e-48	0.572213	0.589171	0.532765		0.643998	0.699692	1.00339	0.693722	0.399058
IPI00761051;IPI00844267;IPI00746361;IPI00914869	Erythroid differentiation-related factor 1	EDRF1	1	1	0.9	138.53	1238	0.00038844			1.88363						0.614024
IPI00329536;IPI00941708;REV_IPI00142768;REV_IPI00015631;IPI00916211	Early endosome antigen 1	EEA1	57	54	42.5	162.46	1411	0	0.748391	0.65634	0.860585	1.04643	1.03653	1.34253	2.1222	3.16897	3.69604
IPI00432040;IPI00395515;IPI00171248	Polycomb protein EED	EED	6	6	15	53.06	466	4.6761e-11	0.897666	0.782718	0.837802	0.795355		0.569541			0.299832
IPI00396485;IPI00472724;IPI00025447;IPI00940393;IPI00941522;IPI00382804;IPI00879622	Elongation factor 1-alpha 1	EEF1A1	45	13	78.8	50.14	462	0	0.963206	0.773694	0.874432	0.97561	0.886918	0.81493	0.778756	0.721605	0.809913
IPI00014424;IPI00938077;IPI00556204;REV_IPI00060990;REV_IPI00922918	Elongation factor 1-alpha 2	EEF1A2	32	14	75.2	50.47	463	0	0.0954927	0.16982	0.0831463	0.168503	0.0804441	0.040843	0.0886132	0.0547765	0.035302
IPI00178440;IPI00164838;IPI00927696;IPI00927920;IPI00926585;IPI00924908	Elongation factor 1-beta	EEF1B2	19	15	78.7	24.763	225	0	0.874661	0.978857	1.05993	0.689941	0.601649	0.565579	0.651933	0.577367	0.759821
IPI00642971;IPI00789435;IPI00023048;IPI00796284;IPI00795920;IPI00793083;IPI00792430	cDNA, FLJ95068, highly similar to Homo sapiens eukaryotic translation elongation factor 1 delta (guanine nucleotide exchange protein) (EEF1D), transcript variant 1, mRNA	EEF1D	30	3	39.9	71.407	647	0	1.10907	1.20438	1.26202	0.91659	0.726058	0.643666	0.614893	0.490557	0.546956
IPI00064086	EEF1D protein	EEF1D	28	1	93.8	28.558	257	0
IPI00003588;IPI00913838	Eukaryotic translation elongation factor 1 epsilon-1	EEF1E1	10	10	58	19.81	174	1.7014e-75	0.494707	0.493608	0.554324	1.80274	0.857265	1.4482	0.937119	0.946342	1.37022
IPI00937615;IPI00000875;IPI00738381;IPI00909534;IPI00908389;IPI00910941	Elongation factor 1-gamma	EEF1G	34	34	70.3	50.118	437	0	0.776699	0.636011	0.773216	0.505766	0.362608	0.343879	0.474744	0.423998	0.496056
IPI00186290;IPI00909570;IPI00440662	Elongation factor 2	EEF2	80	78	81	95.337	858	0	0.815661	0.758553	0.696136	0.58214	0.68956	0.519696	1.21687	0.922254	0.663438
IPI00011689	Elongation factor 2 kinase	EEF2K	4	4	5.8	82.143	725	3.6981e-06		0.91166			0.461063	1.34322	0.789391
IPI00028050;IPI00789634;IPI00793158;IPI00792787	Selenocysteine-specific elongation factor	EEFSEC	12	12	27.9	65.338	596	1.9977e-82	0.666445	0.624025	0.717412	0.534616	0.284738	0.316196	0.617055	0.664938	0.806712
IPI00029658;IPI00220814;IPI00220815;IPI00220813;IPI00908496;IPI00893517;IPI00922935;IPI00894239;IPI00893769;IPI00894009;IPI00893884	EGF-containing fibulin-like extracellular matrix protein 1	EFEMP1	6	6	15.6	54.64	493	3.8224e-45	25.7433		45.5083
IPI00640276	EF-hand domain-containing family member A1	EFHA1	2	2	7.4	49.666	434	2.6247e-21	1.16147					0.832848
IPI00031091;IPI00916914;IPI00915909;IPI00917776;IPI00917888	EF-hand domain-containing protein D1	EFHD1	11	9	46	26.927	239	2.8472e-94	5.72672		4.592	13.2753	7.48783	16.1684
IPI00060181;IPI00552365	EF-hand domain-containing protein D2	EFHD2	10	8	37.9	26.697	240	1.1307e-28	1.40764	1.04463		0.448914	0.628101	0.69056	1.59637	1.86386	3.33979
IPI00024307	Ephrin-B1	EFNB1	9	9	40.2	38.006	346	5.9541e-34							10.9719	22.6162	21.7912
IPI00005126;IPI00552558	Ephrin-B2	EFNB2	1	1	4.5	36.923	333	0.0026593
IPI00470711;IPI00941700;IPI00816614;IPI00470468;IPI00896386;IPI00892689;IPI00877167;IPI00892551	Protein EFR3 homolog A	EFR3A	8	8	12.7	92.923	821	9.908e-31			3.19275						1.816
IPI00293026;IPI00759768;IPI00878078;IPI00887069	Elongation factor Tu GTP-binding domain-containing protein 1	EFTUD1	22	22	23.6	125.43	1120	0	0.519157	0.423998	0.996214	1.06226	0.798276	1.25919	3.05595	2.58839	4.19481
IPI00003519;IPI00917777;IPI00903143	116 kDa U5 small nuclear ribonucleoprotein component	EFTUD2	37	35	44.2	109.43	972	0	1.24544	1.08718	1.12202	0.95039	0.755915	0.933968	0.864155	0.556824	0.654493
IPI00383960	EGF-like domain-containing protein 7	EGFL7	3	3	12.1	29.617	273	7.1274e-06									0.108633
IPI00018274;IPI00924546;IPI00221347;IPI00943104;IPI00221348;IPI00221346;IPI00926683;IPI00915452	Epidermal growth factor receptor	EGFR	30	26	30.3	134.28	1210	3.1526e-283	18.8936	47.6985	25.6391	8.03536		7.68108	114.458	22.2286	49.3097
IPI00004928;IPI00328822	Egl nine homolog 1	EGLN1	6	6	21.6	46.02	426	3.3327e-17	0.501781			6.32231	9.36856	7.92581
IPI00178187;IPI00845271;IPI00433194;IPI00893239	EH domain-binding protein 1	EHBP1	9	7	8.1	140.02	1231	3.725e-15	2.90596	1.37097	3.32204				3.4992		3.34739
IPI00296421	EH domain-binding protein 1-like protein 1	EHBP1L1	3	2	2.6	161.85	1523	1.7056e-05			1.74978						1.64236
IPI00017184;IPI00657915;IPI00853165;IPI00853100;IPI00852957;IPI00853038	EH domain-containing protein 1	EHD1	34	21	71	60.626	534	0	2.09494	1.67653	1.87811	0.989413	0.84317	0.844595	3.25553	2.44123	1.88398
IPI00100980;IPI00922156;IPI00910301	EH domain-containing protein 2	EHD2	19	16	46.4	61.161	543	2.282e-220	52.3341	31.2588	19.974				63.3072	20.8842	18.1683
IPI00005578	EH domain-containing protein 4	EHD4	28	20	58	61.174	541	1.0278e-285	1.56157	1.79289	2.55506	1.70117	2.11403	2.3006	3.14139	3.51692	2.67838
IPI00172578;IPI00034048	ETS homologous factor	EHF	2	1	9.3	34.892	300	0.00019109	22.6081
IPI00216164;IPI00927231;IPI00796526;IPI00926990	Peroxisomal bifunctional enzyme	EHHADH	6	6	12	79.494	723	3.7573e-79	2.14703			1.07582			2.13274	2.10544	4.05236
IPI00015526;IPI00942420;IPI00216443;IPI00645334;IPI00384472	Histone-lysine N-methyltransferase, H3 lysine-9 specific 5	EHMT1	2	2	2.2	141.46	1298	0.00037496			0.596694						0.326744
IPI00788863;IPI00893814;IPI00797257;IPI00892722;IPI00892914;IPI00096972;IPI00892814;IPI00220795;IPI00939492;IPI00940015;IPI00893334;IPI00941307;IPI00892976;IPI00640176	Euchromatic histone-lysine N-methyltransferase 2	EHMT2	6	6	4.9	138.77	1267	2.1228e-18		0.712454	0.869641			0.56478			0.260947
IPI00872497;IPI00478368	Etoposide-induced protein 2.4 homolog	EI24	2	2	5.3	40.979	359	1.3025e-05			1.92634			3.79983			4.0282
IPI00015077;IPI00798174;IPI00457347;IPI00879317	Eukaryotic translation initiation factor 1	EIF1	12	6	85.8	12.732	113	0	0.603318	0.595274	0.651296	0.934405	0.712962	0.804376	0.864304	0.559378	0.511771
IPI00298618	Probable RNA-binding protein EIF1AD	EIF1AD	2	2	20	19.053	165	3.1332e-11	0.564972	1.43047			0.738171		1.26868
IPI00232533;IPI00074224;IPI00023004;IPI00642387;IPI00647118	Eukaryotic translation initiation factor 1A, X-chromosomal	EIF1AX	10	10	69.4	16.46	144	7.1768e-82	0.62901	0.490244	0.607977	0.885583	0.930492	0.909753	0.936768	1.05561	0.916086
IPI00031489	Eukaryotic translation initiation factor 1b	EIF1B	8	2	67.3	12.823	113	1.776e-167
IPI00902564;IPI00845305	Eukaryotic translation initiation factor 2A	EIF2A	28	2	67.7	64.989	585	0	0.720305	0.66769	0.607755	0.438635	0.377572	0.367552	0.468669	0.418043	0.309972
IPI00012462;IPI00939283;IPI00795312	Eukaryotic translation initiation factor 2A	EIF2A	27	1	63.4	67.851	609	0	0.862441	0.882924	0.860882	0.0557569			1.01379	0.932575	0.665425
IPI00328149;IPI00328150;IPI00921031	Eukaryotic translation initiation factor 2-alpha kinase 1	EIF2AK1	2	2	4	71.106	630	2.2391e-05
IPI00019463;IPI00385404;IPI00807398;IPI00892809	Interferon-induced, double-stranded RNA-activated protein kinase	EIF2AK2	18	18	33.9	62.094	551	5.3909e-128	0.665602	0.6027	0.562651	0.279244	0.209402	0.313893	0.884095	0.834934	0.751936
IPI00303053;IPI00927902;IPI00927221	Eukaryotic translation initiation factor 2-alpha kinase 3	EIF2AK3	1	1	1.2	125.21	1116	2.509e-19
IPI00163851;IPI00456685	Eukaryotic translation initiation factor 2-alpha kinase 4	EIF2AK4	10	10	7.8	186.84	1649	9.9029e-45			5.87061				8.38012		9.94629
IPI00221300;IPI00910969;IPI00783880;IPI00791918	Translation initiation factor eIF-2B subunit alpha	EIF2B1	16	16	51.8	33.712	305	3.3258e-81	0.763301	0.549874	0.73244	1.15531	1.10483	1.35659	0.790764	0.693529	0.905305
IPI00028083	Translation initiation factor eIF-2B subunit beta	EIF2B2	10	10	37.3	38.989	351	3.8346e-162	0.750525	0.93188	0.838645	1.10344	1.08413	1.0589	0.87858	0.761267	0.691133
IPI00006504;IPI00217227;IPI00332950;IPI00872304;IPI00747747;IPI00513887	Translation initiation factor eIF-2B subunit gamma	EIF2B3	14	14	42	50.24	452	1.6609e-50	1.1214	1.062	1.16148		1.57973	1.70369	1.10832	1.17552	1.32968
IPI00005979;IPI00654843;IPI00220232;IPI00908922;IPI00892585;IPI00893055;IPI00893169	Translation initiation factor eIF-2B subunit delta	EIF2B4	12	12	30.8	57.557	523	4.237e-163	0.935191	0.874126	1.21212	1.43297	1.49972	1.81518	0.918274	0.998602	1.24888
IPI00011898;IPI00925085;IPI00790479;IPI00925483;IPI00793254;IPI00925244;IPI00795510;IPI00795184	Translation initiation factor eIF-2B subunit epsilon	EIF2B5	14	14	24.5	80.379	721	2.5441e-76	0.984543	0.945448	1.11452	1.5333	1.48739	2.00884	0.870549	1.07527	1.36763
IPI00007736;IPI00646765;IPI00030602;IPI00873752	Protein argonaute-1	EIF2C1	6	1	8.5	97.213	857	6.0782e-37
IPI00745433;IPI00929290;IPI00794808	Protein argonaute-2	EIF2C2	27	21	46.1	97.207	859	5.9162e-188	0.937295	0.862218	1.02907	1.13095	0.985125	1.19011	0.621813	0.647962	0.689322
IPI00304181;IPI00551009;IPI00872123;IPI00514988	Protein argonaute-3	EIF2C3	8	3	13.3	97.359	860	4.5347e-39			4.26821			0.117929			5.8924
IPI00219678;IPI00909998	Eukaryotic translation initiation factor 2 subunit 1	EIF2S1	25	25	68.6	36.112	315	7.14e-303	0.96637	0.996115	0.916003	0.9522	1.045	0.942063	0.931359	0.878194	0.808146
IPI00021728;IPI00176637;IPI00816442	Eukaryotic translation initiation factor 2 subunit 2	EIF2S2	25	25	68.2	38.388	333	0	1.04149	0.962371	0.974279	0.982029	1.10957	1.02159	1.01527	1.03474	0.922169
IPI00297982;IPI00900305;IPI00900297;IPI00644287;IPI00914525	Eukaryotic translation initiation factor 2 subunit 3	EIF2S3	23	23	56.1	51.109	472	0	1.04503	0.94162	0.872829	1.04012	1.15556	1.09324	1.00677	1.10908	0.92687
IPI00029012;IPI00644494	Eukaryotic translation initiation factor 3 subunit A	EIF3A	87	86	51	166.57	1382	0	1.13868	1.07216	1.0926	0.906536	0.931619	0.907523	1.39053	1.29286	1.22091
IPI00719752;IPI00396370;IPI00893301;IPI00893431	Eukaryotic translation initiation factor 3 subunit B	EIF3B	42	42	52.2	99.028	873	0	0.566316	0.631752	0.460936	0.53285	0.57006	0.459158	0.782595	0.692377	0.591296
IPI00016910;IPI00646839;IPI00922360;IPI00910003;IPI00873286;IPI00939953	Eukaryotic translation initiation factor 3 subunit C	EIF3C	38	38	45.2	105.34	913	0	1.08554	1.14557	0.948497	0.866101	0.830772	0.724218	1.41527	1.42833	0.956755
IPI00791086;IPI00006181;IPI00903191;IPI00789582;IPI00879112;IPI00797054;IPI00879261	Putative uncharacterized protein EIF3D	EIF3D	28	18	48.4	63.902	548	0	1.33177	1.27202	1.30501	0.921065	1.16135	0.832293	1.41868	1.32424	1.07562
IPI00879735	Eukaryotic translation initiation factor 3, subunit D	EIF3D	11	1	56.4	19.131	165	1.953e-136
IPI00013068;IPI00796161	Eukaryotic translation initiation factor 3 subunit E	EIF3E	29	29	63.8	52.22	445	0	1.27535	1.25706	1.12299	0.878426	0.912825	0.764584	1.33424	1.30632	0.941531
IPI00465233;IPI00745266;IPI00910633;IPI00879876;IPI00910422;IPI00877935;IPI00878425;IPI00877598;IPI00787469;IPI00878298	Eukaryotic translation initiation factor 3, subunit E interacting protein	EIF3EIP	33	33	58.3	70.901	607	0	1.33147	1.24696	1.17444	0.85266	0.863483	0.826378	1.39788	1.35637	1.15475
IPI00290460;IPI00885107;IPI00921947;IPI00910276	Eukaryotic translation initiation factor 3 subunit G	EIF3G	19	19	60.6	35.611	320	4.3174e-200	0.710026	0.824063	0.747384	0.685777	0.473776	0.648635	0.744269	0.777303	0.792644
IPI00012795;IPI00642205;REV_IPI00000858;REV_IPI00941607;REV_IPI00941723;REV_IPI00921016;REV_IPI00922214;REV_IPI00793755;REV_IPI00154408;REV_IPI00642023	Eukaryotic translation initiation factor 3 subunit I	EIF3I	18	18	65.8	36.501	325	1.4199e-271	0.734754	0.788146	0.717515	0.620964	0.636578	0.631114	0.832848	0.844595	0.789079
IPI00290461;IPI00910728	Eukaryotic translation initiation factor 3 subunit J	EIF3J	13	13	51.6	29.062	258	1.2349e-202	0.969368	1.19208	1.26236	1.5013	1.46254	1.57446	0.805672	0.703977	1.08761
IPI00033143	Eukaryotic translation initiation factor 3 subunit K	EIF3K	9	9	50	25.059	218	4.4827e-277	1.24763	1.39208	1.21042	0.998203	0.875427	0.929973	1.37282	0.973141	1.1302
IPI00102069;IPI00909759	Eukaryotic translation initiation factor 3 subunit M	EIF3M	23	23	64.7	42.502	374	0	1.05186	0.820412	0.870701	0.800961	0.800833	0.821895	1.22121	1.11681	1.03872
IPI00647650;IPI00941359;IPI00793882	cDNA FLJ35809 fis, clone TESTI2006016, highly similar to Eukaryotic translation initiation factor 3 subunit 3	EIF3S3	14	14	41.3	41.581	366	9.3795e-235	1.0878	1.28396	1.10387	0.952562	0.930233	0.805997	1.32668	1.18766	1.18237
IPI00025491;IPI00796657;IPI00910691;IPI00790597;IPI00794324;IPI00927069;IPI00879391;IPI00927480;IPI00815667;IPI00791914;IPI00879131;IPI00927306	Eukaryotic initiation factor 4A-I	EIF4A1	44	26	91.9	46.153	406	0	0.980873	1.04646	1.06503	0.616903	0.541917	0.549541	1.15091	1.02913	1.05513
IPI00409717;IPI00328328;IPI00924536;IPI00030296;IPI00788730;IPI00794607;IPI00793328;IPI00790077;IPI00793220;IPI00792676	Eukaryotic initiation factor 4A-II	EIF4A2	29	11	59.6	46.489	408	0	2.21882	1.35272	1.97297	2.24321	3.01123	3.7287	1.43139	1.87252	3.50914
IPI00009328	Eukaryotic initiation factor 4A-III	EIF4A3	32	27	71	46.871	411	0	1.63685	2.33378	1.31903	1.18778	1.26475	1.09807	0.800448	0.57544	0.557476
IPI00942600;IPI00012079;IPI00908588;IPI00798302;IPI00910983;IPI00788971;IPI00816329;IPI00797648	Eukaryotic translation initiation factor 4B	EIF4B	26	26	44.3	69.697	616	6.4284e-215	0.491376	0.462065	0.442087	0.414766	0.459812	0.380214	0.549692	0.4018	0.476963
IPI00908416;IPI00027485;IPI00873680;IPI00788723;IPI00852709	Eukaryotic translation initiation factor 4E	EIF4E	9	9	40.3	28.777	248	1.3761e-132	0.56123	0.487211	0.602882	1.06385	1.17834	1.41097	0.840901	0.99681	1.14611
IPI00744211;IPI00916635;IPI00556081;IPI00917532;IPI00917207;IPI00915774;IPI00917665;IPI00910085;IPI00879488	Eukaryotic translation initiation factor 4E type 2	EIF4E2	7	7	42	28.362	245	4.144e-31	0.604961	0.817327		0.855213	0.76746		1.14236	0.900495
IPI00002569	Eukaryotic translation initiation factor 4E-binding protein 1	EIF4EBP1	4	4	41.5	12.58	118	1.6532e-73					1.81399	1.66995	1.06341	0.690512
IPI00002570	Eukaryotic translation initiation factor 4E-binding protein 2	EIF4EBP2	1	1	12.5	12.939	120	7.6723e-07				1.12877	16.2174
IPI00291800;IPI00414095;IPI00550518;IPI00880203	Eukaryotic translation initiation factor 4E transporter	EIF4ENIF1	1	1	1.9	108.2	985	5.495e-05
IPI00927510;IPI00926411;IPI00384463;IPI00926013;IPI00220365;IPI00293474	Eukaryotic translation initiation factor 4 gamma 1	EIF4G1	66	1	40.9	166.75	1513	0	0.626959	0.546896	0.564557	0.714643	0.566348	0.604887	0.76929	0.706914	0.773395
IPI00552639	Eukaryotic translation initiation factor 4 gamma 1	EIF4G1	65	1	40.5	175.53	1600	0
IPI00941589;IPI00782985	Eukaryotic translation initiation factor 4 gamma 2	EIF4G2	37	1	49.1	102.36	907	0	1.56311	1.48339	1.66254	1.00801	0.982608	1.09769	1.13622	1.14201	1.02239
IPI00015952;IPI00654814	cDNA FLJ59571, highly similar to Eukaryotic translation initiation factor 4gamma 2	EIF4G2	37	1	45.3	110.26	980	0
IPI00646377;IPI00328268;IPI00874215;IPI00748864	Eukaryotic translation initiation factor 4 gamma 3	EIF4G3	19	11	10.7	176.65	1585	2.4609e-99	1.89086	0.920895		1.20704			2.11345	2.25958	2.06305
IPI00411710	Eukaryotic translation initiation factor 4 gamma 3	EIF4G3	2	2	5.6	67.559	630	8.6979e-101									2.61876
IPI00014263	Eukaryotic translation initiation factor 4H	EIF4H	17	7	58.9	27.385	248	0	0.721917	0.68686	0.696767	0.509658	0.388561	0.351235	1.05319	1.16306	1.35772
IPI00375127	Eukaryotic translation initiation factor 4H	EIF4H	11	1	26.2	32.604	294	1.1439e-248			0.367634						0.226773
IPI00022648;IPI00910936	Eukaryotic translation initiation factor 5	EIF5	21	21	39.9	49.222	431	2.7849e-215	0.552608	0.733945	0.67861	0.97704	1.10959	0.877655	0.661638	0.569898	0.516742
IPI00376005;IPI00411704;IPI00855924;IPI00006935	Eukaryotic translation initiation factor 5A-1	EIF5A	17	17	73.9	20.17	184	0	1.36732	1.25041	1.37193	0.658718	0.625274	0.780701	1.32871	1.36732	1.77032
IPI00299254	Eukaryotic translation initiation factor 5B	EIF5B	43	43	40.9	138.8	1220	0	0.799233	0.733945	0.86103	0.863409	0.817261	0.902446	1.12081	1.14311	1.42666
IPI00010105;IPI00375391;IPI00640731;IPI00893107;IPI00893507;IPI00892804	Eukaryotic translation initiation factor 6	EIF6	9	9	51	26.599	245	3.7043e-275	1.97033	2.23169	2.3033	1.00519	0.794344	1.14858	1.71966	1.77974	2.09153
IPI00396627;IPI00789842;IPI00398822	Zinc phosphodiesterase ELAC protein 2	ELAC2	17	4	31.2	92.218	826	8.3454e-162	1.08109	1.16163	0.942241	0.938527	0.869792	0.592382	1.00643	0.699545	0.390793
IPI00798145;IPI00398823;IPI00940094	cDNA FLJ56210, highly similar to Zinc phosphodiesterase ELAC protein 2 (EC 3.1.26.11)	ELAC2	14	1	34.1	70.031	624	1.8383e-144
IPI00301936;IPI00940851;IPI00184721	cDNA FLJ60076, highly similar to ELAV-like protein 1	ELAVL1	17	16	50.1	38.996	353	2.4466e-301	1.24663	1.4317	1.28156	0.919963	0.52776	0.994431	0.942152	0.684978	0.772738
IPI00644008;IPI00513758;IPI00607677;IPI00479625;IPI00643012;IPI00943170;IPI00644588;IPI00395507;IPI00902494;IPI00030250;IPI00219967;IPI00031552;IPI00140449	ELAV (Embryonic lethal, abnormal vision, Drosophila)-like 2 (Hu antigen B)	ELAVL2	3	2	6.5	42.417	387	0.0028468				0.93932
IPI00167002;IPI00384476	ETS-related transcription factor Elf-1	ELF1	2	2	5	67.497	619	1.2056e-46	1.09674	0.838785					0.90843
IPI00607557;IPI00009995;IPI00396265;IPI00607896;IPI00439925	ETS-related transcription factor Elf-2	ELF2	1	1	2.4	63.966	593	0.0064266
IPI00004581;IPI00844532;IPI00643579	ETS-related transcription factor Elf-3	ELF3	2	1	6.5	41.454	371	0.0013435
IPI00011757	RNA polymerase II elongation factor ELL2	ELL2	3	3	3.9	72.324	640	2.1432e-05				1.02814
IPI00260090;IPI00940537;IPI00640649;IPI00101924;IPI00642462	cDNA FLJ60834, highly similar to Engulfment and cell motility protein 2 (CED-12 homolog A)	ELMO2	2	2	5.3	83.958	732	0.00011877		0.757346
IPI00793764;IPI00644140;IPI00930637;IPI00003033	Engulfment and cell motility protein 3	ELMO3	10	10	14.9	87.101	773	2.7583e-24	3.33244	2.13229	2.93876		1.17691	0.649393	4.2015	11.3368	6.34961
IPI00217918	ELMO domain-containing protein 2	ELMOD2	5	5	19.8	34.96	293	1.8954e-31	1.40323	1.00073			2.69906		1.6372	1.66074	2.46914
IPI00645469;IPI00063650;IPI00878890	Transcription elongation factor 1 homolog	ELOF1	1	1	15.8	12.829	114	4.5319e-05
IPI00010187;IPI00910626	Elongation of very long chain fatty acids protein 1	ELOVL1	2	2	9	32.662	279	1.0573e-36	0.95057		1.19799			1.59739			2.83776
IPI00910962;IPI00328307	cDNA FLJ52813, highly similar to Homo sapiens ELOVL family member 5, elongation of long chain fatty acids, mRNA	ELOVL5	3	3	11	38.368	326	7.794e-78	4.35616	4.7792					4.41248	6.02083
IPI00783761	Elongation of very long chain fatty acids protein 7	ELOVL7	1	1	3.6	33.356	281	0.00023232		0.582683					0.576768
IPI00642369;IPI00015560;IPI00909025;IPI00304246;IPI00289763;IPI00470701;IPI00296893;IPI00641547;IPI00643466;IPI00647238;IPI00645294	cDNA FLJ60364, highly similar to Stat3-interacting protein	ELP2	11	11	17.5	100.02	891	6.1729e-65	0.880592	0.804246	1.12792	1.69915	2.44218	2.44936	1.08534	1.47815	1.07712
IPI00165477;IPI00844099;IPI00844135	Elongator complex protein 3	ELP3	9	9	22.3	62.258	547	1.4797e-19	0.662559	0.73046	0.632511		0.729076	1.53304	1.21637	1.15516	0.912242
IPI00784483;IPI00909309;IPI00061376	Elongator complex protein 4	ELP4	2	2	5.4	58.713	535	4.3357e-06	0.873057
IPI00394808	Embigin	EMB	1	1	5.2	36.881	327	0.0032877
IPI00032003;IPI00552214;IPI00879203	Emerin	EMD	7	7	44.5	28.994	254	6.8643e-65	0.740631	0.841822	0.767872	1.21084	1.11433	1.11138	1.43324	1.25691	1.73937
IPI00025347;IPI00790725;IPI00794141;IPI00792804	Probable ribosome biogenesis protein NEP1	EMG1	9	9	45.5	26.72	244	5.016e-111	0.867303	0.819336	0.675402	0.749176	0.647291	0.688089	0.522302	0.258572	0.583703
IPI00550611;IPI00334011;IPI00004582	Echinoderm microtubule-associated protein-like 1	EML1	6	5	9.5	91.984	834	5.947e-08	0.00876424	0.0248299		1.39311				0.00665203
IPI00015944;IPI00921883;IPI00921867;IPI00923627;IPI00895879;IPI00742831;IPI00847255	Echinoderm microtubule-associated protein-like 2	EML2	21	20	36.7	88.588	815	0	1.52781	1.02762	1.98012	1.25207	1.6589	1.64753	0.784745	1.33009	2.02102
IPI00852659;IPI00167909;IPI00843902;IPI00910363;IPI00843958;IPI00852738;IPI00852574	Echinoderm microtubule associated protein like 3, isoform CRA_e	EML3	12	12	16.8	95.283	897	4.295e-76	0.155444	0.204658	0.209714	0.307787	0.332314	0.351444	0.349382	0.4408	0.487211																												Zinc finger protein 573	Zinc finger protein 195	Zinc finger protein 528	ZNF30 protein	cDNA FLJ59328, highly similar to Zinc finger protein 30
IPI00001466;IPI00940934;IPI00854834;IPI00913926;IPI00893935;IPI00917887	Echinoderm microtubule-associated protein-like 4	EML4	22	6	25.2	108.9	981	3.8675e-144	1.10121	0.855578	1.23204	0.984349	0.776217	0.845094	0.626488	0.775014	0.986875
IPI00893067	Putative uncharacterized protein EML4	EML4	17	1	28	86.081	768	6.0594e-120
IPI00411623;IPI00646954;IPI00374054;IPI00783772;IPI00749432;IPI00640474;IPI00170979	Protein enabled homolog	ENAH	15	15	30.6	66.509	591	5.499e-131	4.05959	3.85564	4.85956	8.67453	11.7583	7.44768	2.35777	2.0256	2.7112
IPI00001952	Endonuclease domain-containing 1 protein	ENDOD1	9	9	28.2	55.016	500	2.2402e-90	2.06424	1.41987	2.09109		2.43002		6.3597	7.9466	7.67401
IPI00290614	Endonuclease G, mitochondrial	ENDOG	2	2	9.8	32.646	297	7.5225e-12	1.41655						4.48209		1.51651
IPI00021106;IPI00925869;IPI00925148;IPI00927095;IPI00926369;IPI00926574;IPI00908995	Nuclease EXOG, mitochondrial	ENDOGL1	3	3	9	41.084	368	4.607e-11								2.7717	4.92732
IPI00465248;IPI00759806;IPI00328587;IPI00790892	Alpha-enolase	ENO1	51	47	87.3	47.168	434	0	1.65136	1.54304	1.5657	0.626763	0.662032	0.709622	1.73934	2.04161	2.19935
IPI00216171;IPI00791564;IPI00792715	Gamma-enolase	ENO2	13	8	45.6	47.268	434	0	5.14139	4.75896	5.50964	1.49216	0.174095	0.218374	1.82232	1.78387	5.79408
IPI00218474;IPI00909949;IPI00942494;IPI00909595	Beta-enolase	ENO3	7	3	21.4	46.931	434	1.2428e-186		0.956572					1.90179
IPI00038378;IPI00385140;IPI00795241	Enolase-phosphatase E1	ENOPH1	6	6	27.2	28.932	261	5.9701e-76	0.825151	0.788084		0.994431	0.990982	1.072	0.663967	0.76864	1.12186
IPI00300601;IPI00418794;IPI00936665;IPI00184190;IPI00647004;IPI00647540;IPI00645578;IPI00643643;IPI00639934;IPI00645099;IPI00646474;IPI00644507	Mitochondrial enolase superfamily member 1	ENOSF1	9	9	28.2	49.786	443	8.3848e-35	1.86362	1.70413	1.95091	1.45323	0.987849	2.16207	0.876194	1.28121	1.07066
IPI00184311;IPI00478248	Ectonucleotide pyrophosphatase/phosphodiesterase family member 1	ENPP1	9	9	13.1	104.92	925	2.8304e-44					4.73821	6.76727
IPI00007249	Ectonucleotide pyrophosphatase/phosphodiesterase family member 4	ENPP4	4	4	13.5	51.641	453	4.2229e-08	5.7924	6.49519			2.0683
IPI00410177;IPI00470835;IPI00929648;IPI00644717;IPI00410178;IPI00383552;IPI00220797;IPI00410179;IPI00410180;IPI00410181;IPI00410387	Endosulfine alpha	ENSA	12	11	44.4	20.994	187	4.669e-71	0.852878	1.08058	1.26539	0.691994	2.57792	1.56106	0.381577	0.413839	0.572672
IPI00001586;IPI00216370	Ectonucleoside triphosphate diphosphohydrolase 2	ENTPD2	3	3	8.7	53.665	495	1.3697e-56	2.16338		3.8401
IPI00215952	Ectonucleoside triphosphate diphosphohydrolase 5	ENTPD5	1	1	4.2	47.517	428	4.5319e-05
IPI00024620;IPI00794848;IPI00791152;IPI00790965;IPI00789193;IPI00795558	Enhancer of yellow 2 transcription factor homolog	ENY2	5	5	41.6	11.528	101	8.1786e-06			0.466374	0.665336		0.780579	0.603027		0.432339
IPI00020985	Histone acetyltransferase p300	EP300	6	3	2.9	264.16	2414	1.1859e-39			1.84703						0.690369
IPI00167535;IPI00064931;IPI00783050;IPI00878154;IPI00783692;IPI00798339	E1A-binding protein p400	EP400	5	5	2.2	343.61	3160	1.2128e-10	1.08177		0.640615						0.27474
IPI00445309;IPI00885012;IPI00295968;IPI00853177;IPI00852634;IPI00789429;IPI00384652;IPI00433444;IPI00795332;IPI00793943	EP400 N-terminal-like protein	EP400NL	1	1	2.5	51.752	488	0.0090041			0.323196
IPI00003921;IPI00218697;IPI00218700;IPI00791144;IPI00739613;IPI00553103;IPI00218698;IPI00218699;IPI00218701;IPI00877070	Protein 4.1	EPB41	4	3	4.5	97.016	864	6.8424e-08	0.266525			0.601902	0.707464	0.956755
IPI00024062;IPI00644651;IPI00645410;IPI00256095;IPI00646098;IPI00642786;IPI00641968;IPI00642915;IPI00646198;IPI00646661;IPI00647052;IPI00607638;IPI00641271	Band 4.1-like protein 1	EPB41L1	15	11	21.5	98.502	881	4.1233e-100	1.42996	1.21634	1.17906	0.812282	0.946701	0.470765	0.563984	0.806712	0.394649
IPI00015973;IPI00556351;IPI00788953;IPI00444820;IPI00383844	Band 4.1-like protein 2	EPB41L2	32	22	35.6	112.59	1005	1.4776e-256	13.5011	16.3977	19.5427	0.600384	0.931706	0.571331	3.05213	1.93686	2.1337
IPI00022133	Erythrocyte membrane protein band 4.1-like 2	EPB41L2	2	1	10.3	26.015	234	0.0003834
IPI00032230;IPI00922914;IPI00215716;IPI00215717;IPI00643241;IPI00921919;IPI00643553;IPI00641850;IPI00639855	Band 4.1-like protein 3	EPB41L3	5	1	5.3	120.68	1087	1.1315e-20
IPI00100362;IPI00102391;IPI00152953;IPI00874276	Band 4.1-like protein 4B	EPB41L4B	5	3	12.7	58.566	518	1.4472e-17	2.43576	1.98574			3.14209
IPI00217841;IPI00376221;IPI00890731;IPI00890719	Band 4.1-like protein 5	EPB41L5	11	9	26.9	57.885	505	2.5142e-68	0.287936	0.640985	0.300743	0.6035	1.15564	0.593965	0.237829	0.136323	0.126092
IPI00893715;IPI00296215;IPI00893928	Putative uncharacterized protein EPCAM	EPCAM	12	12	40.9	37.893	342	1.0685e-193	1.76579	1.52488	1.35064	0.484731	0.772917	0.352473	0.116895	0.0755744	0.04662
IPI00657648;IPI00259102;IPI00924609;IPI00924633	Mammalian ependymin-related protein 1	EPDR1	2	2	5.8	38.15	344	2.677e-07
IPI00294250	Ephrin type-A receptor 1	EPHA1	4	4	5.3	108.07	976	8.8321e-75			0.322155	2.05116	3.90778	1.72129	1.13286		0.489045
IPI00021267	Ephrin type-A receptor 2	EPHA2	11	10	14	108.27	976	4.2963e-61		3.28796	1.64503				10.1489	3.67525	5.06457
IPI00008318;IPI00917056	Ephrin type-A receptor 4	EPHA4	2	1	2.2	109.86	986	2.5689e-17
IPI00008315;IPI00334334;IPI00219244;IPI00783604;IPI00021275;IPI00016645;IPI00607655;IPI00252979;IPI00219421;IPI00644408;IPI00219245;IPI00903258;IPI00884127;IPI00737817	Ephrin type-B receptor 1	EPHB1	2	1	2	109.88	984	2.3612e-15
IPI00289329;IPI00789482;IPI00789990	Ephrin type-B receptor 3	EPHB3	8	5	11.1	110.33	998	5.6548e-121	1.69165				3.86922	3.64087
IPI00289342;IPI00186826;IPI00909048	Ephrin type-B receptor 4	EPHB4	11	8	14.5	108.27	987	6.623e-98	0.702247	0.624805	0.512636	1.09891	1.40066	1.25935	0.693722	0.520671	0.406488
IPI00009896;IPI00647694;IPI00640017	Epoxide hydrolase 1	EPHX1	25	25	64	52.948	455	1.9421e-168	2.59707	1.96017	2.74446	5.45554	6.4288	7.42446	1.14428	1.57465	1.47971
IPI00104341;IPI00942976;IPI00909862	cDNA FLJ59619, highly similar to Epoxide hydrolase 2 (EC 3.3.2.3)	EPHX2	5	5	14.2	64.73	572	3.0781e-13					11.0541	4.68274
IPI00419721	EPM2A-interacting protein 1	EPM2AIP1	4	4	8.4	70.369	607	3.2696e-14					0.45583			1.39158	0.450288
IPI00647389;IPI00027082;IPI00002495;IPI00397365	Epsin-1	EPN1	7	6	17.2	69.039	662	5.2616e-101	1.97083		2.37265			1.40869	2.28545	2.39808	2.58799
IPI00915466;IPI00397379;IPI00397381;IPI00915293;IPI00790403;IPI00791739;IPI00922410;IPI00790988	Epsin-2	EPN2	4	3	6.7	68.568	642	0.00080722
IPI00300584;IPI00845319;IPI00910899;IPI00386833	Epsin-3	EPN3	8	6	21.2	68.221	632	1.2563e-85	0.457959	0.934667	1.27985	5.59409	11.0317	3.89105	1.89093	1.38439	1.33403
IPI00010951;REV_IPI00014186;REV_IPI00219003;REV_IPI00827480	Epiplakin	EPPK1	156	143	77	555.61	5090	0	1.62681	1.18359	1.18046	0.45159	0.454112	0.298677	0.455042	0.386115	0.245568
IPI00923606;IPI00013452;IPI00909383	cDNA FLJ58269, highly similar to Bifunctional aminoacyl-tRNA synthetase	EPRS	110	109	73.8	170.59	1512	0	3.13244	1.93431	2.76717	2.83672	3.58474	3.78759	1.13941	1.67937	1.449
IPI00292134;IPI00385325;IPI00640127;IPI00916208;IPI00902474	Epidermal growth factor receptor substrate 15	EPS15	14	14	19.2	98.655	896	6.5968e-169	1.30933	1.06043	1.31947	1.10254	0.984737	1.333	1.38806	1.56169	2.03446
IPI00163849;IPI00942431;IPI00646339;IPI00645613;IPI00647324	cDNA FLJ60624, highly similar to Epidermal growth factor receptor substrate 15-like 1	EPS15L1	25	25	35.6	99.606	910	0	0.865426	0.832154	0.85317	0.866401	0.585309	0.625861	0.543183	0.506355	0.655695
IPI00290337;IPI00794000;IPI00792706	Epidermal growth factor receptor kinase substrate 8	EPS8	5	5	10.8	91.88	822	2.1556e-44				0.763359			1.57428	6.34075	3.73037
IPI00301250;IPI00759466;IPI00157535;IPI00253281;IPI00795545	Epidermal growth factor receptor kinase substrate 8-like protein 1	EPS8L1	15	15	25.4	80.308	723	1.9094e-216	0.494413	0.607017	0.481533	2.65125	4.64059	3.77287	0.654622	0.784191	0.777484
IPI00414315;IPI00759759;IPI00909674	Epidermal growth factor receptor kinase substrate 8-like protein 2	EPS8L2	25	25	39.7	82.322	731	0	1.32986	0.900657	0.966651	1.44573	2.54965	1.52835	3.71955	4.86098	3.2076
IPI00026512;IPI00216548	GTP-binding protein era homolog	ERAL1	7	2	20.6	48.349	437	1.0483e-31	0.470433	0.488854	0.67944	1.90956	0.994431	2.93651		0.405318
IPI00165949;IPI00477831	Endoplasmic reticulum aminopeptidase 1	ERAP1	19	19	28.3	107.84	948	2.0935e-272		0.532623	0.901063	0.924898	1.09999	1.13525	0.779423	0.919371	0.879044
IPI00465261;IPI00747807;IPI00877711;IPI00878267	Endoplasmic reticulum aminopeptidase 2	ERAP2	9	9	11.4	110.46	960	3.8657e-40							38.1301	13.614	7.3524
IPI00300384;IPI00845478;IPI00941360;IPI00384288;IPI00179189;IPI00008115;IPI00295401;IPI00000977	Receptor tyrosine-protein kinase erbB-2	ERBB2	41	34	35.6	137.91	1255	0	1.23235	0.664231	0.36491	61.3798	103.954	38.37	1.13394
IPI00438286;IPI00438287;IPI00438288;IPI00438290;IPI00438289;IPI00438291;IPI00438292;IPI00910753	Protein LAP2	ERBB2IP	6	6	7.8	159.05	1419	4.124e-37	2.32823					1.11592	2.22504		1.26537
IPI00298285;IPI00794366	Receptor tyrosine-protein kinase erbB-3	ERBB3	2	2	2.1	148.1	1342	0.00016226
IPI00216719;IPI00374976;IPI00171230;IPI00181684;IPI00216720;REV_IPI00328172;REV_IPI00921541;REV_IPI00921448;REV_IPI00942189	ELKS/RAB6-interacting/CAST family member 1	ERC1	18	11	18.7	128.08	1116	3.9306e-84	1.36859	1.06892					2.68269	3.20113	3.42936
IPI00456707;IPI00472614	ERC protein 2	ERC2	8	1	6.8	111.61	965	2.147e-08
IPI00029728;IPI00642906;IPI00442420;IPI00745781;IPI00745711	TFIIH basal transcription factor complex helicase subunit	ERCC2	10	10	16.2	86.908	760	3.5696e-97	0.903751	0.77226	0.935279	1.09158	0.767342		0.69735	1.0066	0.762253
IPI00747053;IPI00917823;IPI00917952	TFIIH basal transcription factor complex helicase XPB subunit	ERCC3	4	4	7.5	89.277	782	1.8344e-22			11.986	1.60826	1.13788		0.672766
IPI00219179;IPI00657932	DNA repair endonuclease XPF	ERCC4	3	3	5.1	104.48	916	1.3298e-08		0.421336					0.598229
IPI00477535;IPI00640241;IPI00552845;IPI00848102	DNA repair protein complementing XP-G cells	ERCC5	4	4	3.9	133.11	1186	4.2419e-05						3.59415
IPI00414779;IPI00555651	DNA excision repair protein ERCC-6	ERCC6	4	4	3.2	168.41	1493	7.001e-06		1.93945						2.69201	3.04664
IPI00552569;IPI00873388	DNA excision repair protein ERCC-6-like	ERCC6L	15	15	13.4	141.1	1250	2.0322e-51	1.34695	1.07749	1.39484	0.408948			0.756659	0.598516	0.453124
IPI00032936	ETS domain-containing transcription factor ERF	ERF	6	6	15.7	58.702	548	1.2945e-26	1.83611	1.2775		1.06929
IPI00022887;IPI00003635;IPI00916582;IPI00916999;IPI00021763;IPI00916451;IPI00916716	Endoplasmic reticulum-Golgi intermediate compartment protein 1	ERGIC1	13	13	50.7	32.592	290	2.9596e-131	0.445553	0.399856	0.40863	5.16102	7.88022	6.72495	0.644745	0.93006	1.22332
IPI00165651;IPI00874264;IPI00791417;IPI00792747;IPI00440176;IPI00793406;IPI00790722	Endoplasmic reticulum-Golgi intermediate compartment protein 2	ERGIC2	6	6	20.4	43.494	387	2.6979e-09	0.895175				2.10726		1.06518	0.332591	2.36005
IPI00446875;IPI00552115;IPI00006438;IPI00853517;IPI00942583;IPI00383663;IPI00552465;IPI00644136;IPI00472099;IPI00853202	Endoplasmic reticulum-Golgi intermediate compartment protein 3	ERGIC3	5	5	14.1	44.828	398	0.00020961			0.97352	1.21052		3.1173			1.4964
IPI00029631	Enhancer of rudimentary homolog	ERH	8	8	56.7	12.259	104	4.9794e-144	0.984737	1.58343	1.07934	1.17213	1.26773	1.09932	0.953289	0.747831	0.738989
IPI00216873	3'-5' exoribonuclease 1	ERI1	3	3	14.6	40.063	349	2.0254e-08	0.893017								1.25434
IPI00007940;IPI00936931;IPI00879747	cDNA, FLJ96656, highly similar to Homo sapiens SPFH domain family, member 1 (SPFH1), mRNA	ERLIN1	14	11	48.3	39.171	348	7.2535e-159	2.08082	2.26922	2.27599	1.14016	1.08169		2.15568	2.40477	2.47844
[truncated: 5,280 more rows]
[truncated: 91 more columns]
