# Supplementary material for: Proteomic Changes Resulting from Gene Copy Number Variations in Cancer Cells
Source: PLoS Genet. 2010 Sep 2;6(9):e1001090. doi: 10.1371/journal.pgen.1001090 (PMC2932691; doi:10.1371/journal.pgen.1001090)
Supplement: Table S5 — Peptide table. (9.21 MB XLSX) [file pgen.1001090.s007.xlsx]

## Sheet: peptides
Supplementary Table 5: Peptide ratios of HCC1143, HCC2218 and HMEC vs. heavy labeled MCF7 cells. Ratios are given for three biological replicates. PEP-posterior error probability
Sequence	Mass	Leading Razor Protein	Protein Names	PEP	Ratio HCC1143/SILAC Replicate 1	Ratio HCC1143/SILAC Replicate 2	Ratio HCC1143/SILAC Replicate 3	Ratio HCC2218/SILAC Replicate 1	Ratio HCC2218/SILAC Replicate 2	Ratio HCC2218/SILAC Replicate 3	Ratio HMEC/SILAC Replicate 1	Ratio HMEC/SILAC Replicate 2	Ratio HMEC/SILAC Replicate 3
AAAAAAAAAAAAAAAGAGAGAK	1595.84	IPI00022649	Solute carrier family 12 member 2;Bumetanide-sensitive sodium-(potassium)-chloride cotransporter 1;Basolateral Na-K-Cl symporter;Bumetanide-sensitive Na-K-Cl cotransporter;Solute carrier family 12 (Sodium/potassium/chloride transporters), member 2, isoform CRA_b;SLC12A2 protein;Solute carrier family 12 (Sodium/potassium/chloride transporters), member 2 variant	1.0197e-57		0.98601		0.054759	0.068089	0.20165
AAAAAAAAAAGAAGGR	1197.62	IPI00005792	Polyadenylate-binding protein 2;Poly(A)-binding protein II;Polyadenylate-binding nuclear protein 1;Nuclear poly(A)-binding protein 1;cDNA FLJ57714, highly similar to Poly(A)-binding protein 2	1.9664e-97	2.1036	1.4381	1.6178	1.7723	2.0882	2.34	1.5901	2.0485	2.7365
AAAAAAAGDSDSWDADAFSVEDPVRK	2592.17	IPI00290461	Eukaryotic translation initiation factor 3 subunit J;Eukaryotic translation initiation factor 3 subunit 1;eIF-3-alpha;eIF3 p35;cDNA FLJ57599, moderately similar to Eukaryotic translation initiation factor 3 subunit 1	1.7291e-57	1.1344	1.0076	0.79429		0.65154	0.63682		1.4205
AAAAAAALQAK	955.545	IPI00003918	60S ribosomal protein L4;L1;cDNA FLJ78454, highly similar to Homo sapiens ribosomal protein L4 (RPL4), mRNA;Ribosomal protein L4, isoform CRA_c;cDNA FLJ78445, highly similar to Homo sapiens ribosomal protein L4 (RPL4), mRNA;cDNA FLJ56689, highly similar to 60S ribosomal protein L4;Ribosomal protein L4 variant;cDNA FLJ50996, highly similar to 60S ribosomal protein L4	7.2475e-15		1.3368				1.2198	0.93687
AAAAAAALQAKSDEK	1414.74	IPI00003918	60S ribosomal protein L4;L1;cDNA FLJ78454, highly similar to Homo sapiens ribosomal protein L4 (RPL4), mRNA;Ribosomal protein L4, isoform CRA_c;cDNA FLJ78445, highly similar to Homo sapiens ribosomal protein L4 (RPL4), mRNA;cDNA FLJ56689, highly similar to 60S ribosomal protein L4;Ribosomal protein L4 variant;cDNA FLJ50996, highly similar to 60S ribosomal protein L4	0.079393
AAAAAAAVAGVGR	1054.59	IPI00914048		1.2376e-11
AAAAAAAVGGQQPSQPELPAPGLALDK	2498.31	IPI00915334	E3 ubiquitin-protein ligase UBR3;N-recognin-3;Ubiquitin-protein ligase E3-alpha-3;Ubiquitin-protein ligase E3-alpha-III;Zinc finger protein 650	3.8411e-58		1.5743			0.45129
AAAAAAGAASGLPGPVAQGLK	1747.96	IPI00185146	Importin-9;Ran-binding protein 9;Importin 9;Importin 9, isoform CRA_b	3.7302e-62	1.0009	1.5517	0.91596	0.75455	0.77866	0.49788	1.1595	0.85257	0.77069
AAAAAAGAGPEMVR	1241.62	IPI00003479	Mitogen-activated protein kinase 1;Extracellular signal-regulated kinase 2;Mitogen-activated protein kinase 2;p42-MAPK;ERT1;cDNA FLJ58314, highly similar to Mitogen-activated protein kinase 1 (EC 2.7.11.24);Mitogen-activated protein kinase 1, isoform CRA_a;Extracellular signal-regulated kinase-2 splice variant	3.6842e-34	0.41695	0.55426	0.32841		1.1998	1.2849	0.51569	0.61412
AAAAAAGEAR	857.436	IPI00014439	Dihydropteridine reductase;HDHPR;Quinoid dihydropteridine reductase;cDNA FLJ76220, highly similar to Homo sapiens quinoid dihydropteridine reductase (QDPR), mRNA;Quinoid dihydropteridine reductase, isoform CRA_d;cDNA FLJ55000, highly similar to Dihydropteridine reductase (EC 1.5.1.34);Quinoid dihydropteridine reductase, isoform CRA_c;cDNA FLJ42391 fis, clone 3NB692002806, highly similar to Dihydr…	0.0016002
AAAAAAGEARR	1013.54	IPI00014439	Dihydropteridine reductase;HDHPR;Quinoid dihydropteridine reductase;cDNA FLJ76220, highly similar to Homo sapiens quinoid dihydropteridine reductase (QDPR), mRNA;Quinoid dihydropteridine reductase, isoform CRA_d;cDNA FLJ55000, highly similar to Dihydropteridine reductase (EC 1.5.1.34);Quinoid dihydropteridine reductase, isoform CRA_c;cDNA FLJ42391 fis, clone 3NB692002806, highly similar to Dihydr…	0.0013428		1.1644					0.5873	0.39198
AAAAAATAAAAASIR	1256.68	IPI00794956	Putative uncharacterized protein SCFD1;Vesicle transport-related protein isoform a variant;Sec1 family domain-containing protein 1;Syntaxin-binding protein 1-like 2;Sly1p;cDNA FLJ57213, highly similar to Sec1 family domain-containing protein 1	5.5872e-106	1.4797	1.4433	1.3436	1.0609	1.0498	0.83328	1.2958	1.3917	1.108
AAAAAAVGPGAGGAGSAVPGGAGPCATVSVFPGAR	2906.45	IPI00639957	Coactivator-associated arginine methyltransferase 1, isoform CRA_b;Putative uncharacterized protein CARM1;Histone-arginine methyltransferase CARM1;Protein arginine N-methyltransferase 4;Coactivator-associated arginine methyltransferase 1	1.7024e-77	2.2934	2.2412		1.565	2.663		2.0704	1.4017
AAAAAEQQQFYLLLGNLLSPDNVVR	2700.42	IPI00939304	Importin-5;Importin subunit beta-3;Karyopherin beta-3;Ran-binding protein 5;cDNA FLJ43041 fis, clone BRTHA3003339, highly similar to Importin beta-3;cDNA FLJ54573, highly similar to Importin beta-3;IPO5 protein;Importin 5	1.2144e-36	0.6816		0.53488		0.0094418	0.57407		0.49314
AAAAAEQQQFYLLLGNLLSPDNVVRK	2828.52	IPI00939304	Importin-5;Importin subunit beta-3;Karyopherin beta-3;Ran-binding protein 5;cDNA FLJ43041 fis, clone BRTHA3003339, highly similar to Importin beta-3;cDNA FLJ54573, highly similar to Importin beta-3;IPO5 protein;Importin 5	1.7898e-43	0.78358				0.93858		0.71885	0.78712
AAAAAGAGSGPWAAQEK	1512.73	IPI00883940		0.0016932		0.58157
AAAAAGTATSQR	1074.54	IPI00828150	Suppressor of G2 allele of SKP1 homolog;Sgt1;Putative 40-6-3 protein;cDNA FLJ75365, highly similar to Homo sapiens SUGT1B (SUGT1) mRNA;cDNA FLJ75780, highly similar to Homo sapiens SGT1, suppressor of G2 allele of SKP1 (SUGT1), mRNA;cDNA FLJ60958, highly similar to Homo sapiens SGT1, suppressor of G2 allele of SKP1 (SUGT1), mRNA;SGT1, suppressor of G2 allele of SKP1 (S. cerevisiae);SGT1, suppress…	9.622e-20	1.1502	1.0813	0.69298	1.6852	1.2679	1.438	0.61698	0.58461	0.60299
AAAAAQGGGGGEPR	1168.56	IPI00018195	Mitogen-activated protein kinase 3;Extracellular signal-regulated kinase 1;Insulin-stimulated MAP2 kinase;MAP kinase 1;p44-ERK1;ERT2;p44-MAPK;Microtubule-associated protein 2 kinase;Mitogen-activated protein kinase 3, isoform CRA_d;cDNA FLJ33690 fis, clone BRAWH2002967, highly similar to Mitogen-activated protein kinase 3 (EC 2.7.11.24);Mitogen-activated protein kinase 3, isoform CRA_b;Putative u…	1.8407e-21	0.97646		1.4059						1.7579
AAAAASAAGPGGLVAGKEEK	1724.91	IPI00414629	Protein unc-119 homolog B;cDNA FLJ44403 fis, clone TUTER2000904, moderately similar to Unc-119 protein homolog (Retinal protein 4)	4.6708e-09	0.76053	2.3323			1.8774				0.74168
AAAAASHLNLDALR	1392.75	IPI00297113	Tripartite motif-containing protein 32;Zinc finger protein HT2A;72 kDa Tat-interacting protein;Tripartite motif-containing 32	4.3015e-95	0.69005	0.68959	0.72602	0.68557	0.87061	0.97114	0.86173	0.4236	0.63688
AAAAATVVPPMVGGPPFVGPVGFGPGDR	2590.34	IPI00021626	RNA-binding protein 42;RNA-binding motif protein 42;cDNA FLJ60187	0.0048987	0.5441
AAAAAVGNAVPCGAR	1354.68	IPI00034277	Probable cation-transporting ATPase 13A1;cDNA FLJ31858 fis, clone NT2RP7001166, highly similar to Probable cation-transporting ATPase 13A1 (EC 3.6.3.-);ATPase type 13A1, isoform CRA_c	1							0.059206
AAAAAWEEPSSGNGTAR	1644.75	IPI00465044	Protein RCC2;Telophase disk protein of 60 kDa;RCC1-like protein TD-60;RCC2 protein	3.0897e-42		1.734						1.3125	1.6166
AAAAECDVVMAATEPELLDDQEAK	2546.15	IPI00329629	DnaJ homolog subfamily C member 7;Tetratricopeptide repeat protein 2;TPR repeat protein 2;cDNA FLJ76281, highly similar to Homo sapiens DnaJ (Hsp40) homolog, subfamily C, member 7 (DNAJC7), mRNA;cDNA, FLJ78980, highly similar to DnaJ homolog subfamily C member 7;DnaJ (Hsp40) homolog, subfamily C, member 7 variant	2.1546e-59		1.5991
AAAAEGVLATR	1028.56	IPI00411983	Biogenesis of lysosome-related organelles complex 1 subunit 2;Centrosome-associated protein;cDNA FLJ54853, highly similar to Biogenesis of lysosome-related organellescomplex-1 subunit 2;Biogenesis of lysosome-related organelles complex-1, subunit 2, isoform CRA_b	1.7748e-11	2.3901	1.7399	1.9579		0.97354	0.94708			0.75489
AAAAELSLLEK	1114.62	IPI00003588	Eukaryotic translation elongation factor 1 epsilon-1;Multisynthetase complex auxiliary component p18;Elongation factor p18	8.5931e-21	2.3783	2.1622	1.1527		1.4804	0.76489	1.1535	1.101	0.86686
AAAAKPNNLSLVVHGPGDLR	1999.1	IPI00216057	Sorbitol dehydrogenase;L-iditol 2-dehydrogenase;cDNA, FLJ92795, Homo sapiens sorbitol dehydrogenase (SORD), mRNA;cDNA FLJ60282, highly similar to Sorbitol dehydrogenase (EC 1.1.1.14);cDNA FLJ50165, moderately similar to Sorbitol dehydrogenase (EC 1.1.1.14)	1.9054e-31	1.0073	1.5315	0.80481	0.44742	0.44918	0.28256	1.6712	1.6068	0.95004
AAAAKPNNLSLVVHGPGDLRLENYPIPEPGPNEVLLR	3930.11	IPI00216057	Sorbitol dehydrogenase;L-iditol 2-dehydrogenase;cDNA, FLJ92795, Homo sapiens sorbitol dehydrogenase (SORD), mRNA;cDNA FLJ60282, highly similar to Sorbitol dehydrogenase (EC 1.1.1.14);cDNA FLJ50165, moderately similar to Sorbitol dehydrogenase (EC 1.1.1.14)	3.6384e-08						0.10225
AAAALMQDR	945.47	IPI00014454	Ras and Rab interactor 1;Ras interaction/interference protein 1;Ras inhibitor JC99;cDNA FLJ51119, highly similar to Ras and Rab interactor 1;cDNA FLJ51965, highly similar to Ras and Rab interactor 1;Ras inhibitor RIN1 variant;cDNA FLJ53581, highly similar to Ras and Rab interactor 1	0.1114									1.0089
AAAAMAAAAGGGAGAAR	1314.65	IPI00015865	Poly(ADP-ribose) glycohydrolase ARH3;ADP-ribosylhydrolase 3;[Protein ADP-ribosylarginine] hydrolase-like protein 2;Putative uncharacterized protein ADPRHL2;cDNA FLJ51852, highly similar to Homo sapiens ADP-ribosylhydrolase like 2 (ADPRHL2), mRNA;cDNA, FLJ79248, highly similar to Homo sapiens ADP-ribosylhydrolase like 2 (ADPRHL2), mRNA;ADP-ribosylhydrolase like 2, isoform CRA_a	0.0023787					0.85528
AAAAPAATTATPPPEGAPPQPGVHNLPVPTLFGTVK	3442.82	IPI00187011	Zinc finger CCCH domain-containing protein 4	0.01216	0.62211
AAAAPGASPSPGGDAAWSEAGPGPRPLAR	2641.3	IPI00384456	DNA mismatch repair protein Msh6;MutS-alpha 160 kDa subunit;G/T mismatch-binding protein;p160;cDNA FLJ55677, highly similar to DNA mismatch repair protein MSH6;cDNA FLJ53432, highly similar to DNA mismatch repair protein MSH6;GTBP-ALT;MSH6 protein	1.3321e-36	0.70619	0.83905		2.1422					7.0367
AAAASAAEAGIATTGTEDSDDALLK	2319.11	IPI00022694	26S proteasome non-ATPase regulatory subunit 4;26S proteasome regulatory subunit S5A;Rpn10;Multiubiquitin chain-binding protein;Antisecretory factor 1;Proteasome (Prosome, macropain) 26S subunit, non-ATPase, 4;Putative PIP5K1A and PSMD4-like protein	8.1875e-42	1.5899	1.5761			1.6074
AAAATMAAAAR	974.497	IPI00166132	Vacuolar protein sorting-associated protein 52 homolog;SAC2 suppressor of actin mutations 2-like protein;Vacuolar protein sorting 52 (S. cerevisiae);Vacuolar protein sorting 52 (Yeast), isoform CRA_c;cDNA FLJ54452, highly similar to Vacuolar protein sorting protein 52;cDNA FLJ55499, highly similar to Vacuolar protein sorting protein 52;cDNA FLJ60156, highly similar to Vacuolar protein sorting pro…	2.4065e-07	1.2194		3.6668	1.5947	1.4155
AAAAVGAGHGAGGPGAASSSGGAR	1863.89	IPI00101952	Solute carrier family 35 member E1	5.4919e-274	1.8803	2.0641	1.5397	0.90164	0.92323	0.89852	1.6186	1.5699	1.1756
AAAAVQGGR	799.43	IPI00472939	Signal peptidase complex subunit 2;Microsomal signal peptidase 25 kDa subunit;cDNA FLJ56339, highly similar to Signal peptidase complex subunit 2 (EC 3.4.-.-)	2.4899e-07		2.2583	2.7181	1.0836		1.2628	1.2736	1.4869	1.2753
AAAAVSESWPELELAER	1827.9	IPI00170935	Leucine-rich repeat-containing protein 47	4.3964e-55	0.79295	1.1544	0.88992			0.93057	0.77719	0.53673
AAAAVSSAK	774.424	IPI00220567	5-formyltetrahydrofolate cyclo-ligase;5,10-methenyl-tetrahydrofolate synthetase;MTHFS protein	0.020886
AAAAVVEFQR	1060.57	IPI00105598	26S proteasome non-ATPase regulatory subunit 11;26S proteasome regulatory subunit S9;26S proteasome regulatory subunit p44.5;cDNA FLJ76114, highly similar to Homo sapiens proteasome (prosome, macropain) 26S subunit, non-ATPase, 11 (PSMD11), mRNA;Proteasome (Prosome, macropain) 26S subunit, non-ATPase, 11, isoform CRA_a;cDNA FLJ58882, highly similar to 26S proteasome non-ATPase regulatory subunit …	1.1689e-09	1.3073	1.2457	1.464		1.2084	1.4834	0.95171	1.0997	1.0286
AAAAVVVPAEWIK	1323.76	IPI00158615	THO complex subunit 2;cDNA FLJ61096, highly similar to THO complex subunit 2;THO complex 2	2.1069e-14		0.67763				1.001
AAADGDDSLYPIAVLIDELR	2116.07	IPI00554737	Serine/threonine-protein phosphatase 2A 65 kDa regulatory subunit A alpha isoform;PP2A, subunit A, PR65-alpha isoform;PP2A, subunit A, R1-alpha isoform;Medium tumor antigen-associated 61 kDa protein;cDNA FLJ77680, highly similar to Homo sapiens protein phosphatase 2 (formerly 2A), regulatory subunit A (PR 65), alpha isoform (PPP2R1A), mRNA;cDNA FLJ78455, highly similar to Homo sapiens protein pho…	2.2576e-134							0.7081	0.79643
AAADGGGPGGASVGTEEDGGGVGHR	2136.94	IPI00890837	Structural maintenance of chromosomes flexible hinge domain-containing protein 1	0.020599	0.27915			1.0848
AAADTLQGPMQAAYR	1562.75	IPI00376317	Enhancer of mRNA-decapping protein 4;Human enhancer of decapping large subunit;Autoantigen Ge-1;Autoantigen RCD-8;cDNA FLJ76807, highly similar to Homo sapiens autoantigen (RCD-8), mRNA;Autoantigen;cDNA FLJ53245, highly similar to Homo sapiens autoantigen (RCD-8), mRNA	2.3814e-14	1.8477	1.8017		2.002	4.4167		2.1472
AAAEAAAEAK	901.451	IPI00009542	Melanoma-associated antigen D2;MAGE-D2 antigen;Breast cancer-associated gene 1 protein;11B6;Hepatocellular carcinoma-associated protein JCL-1;Melanoma antigen family D, 2;Melanoma antigen family D, 2, isoform CRA_d;Putative uncharacterized protein MAGED2;cDNA FLJ58171, moderately similar to Melanoma-associated antigen D2	0.012569		0.51043				0.34041			0.94801
AAAEDVNVTFEDQQK	1663.77	IPI00015891	Prefoldin subunit 4;Protein C-1;cDNA, FLJ92340, highly similar to Homo sapiens prefoldin 4 (PFDN4), mRNA	6.4616e-42	2.8629	1.2919	2.4255		2.2398			0.60488	2.5371
AAAEEGHIIPR	1162.61	IPI00009913	TRAF and TNF receptor-associated protein;ETS1-associated protein 2;ETS1-associated protein II;cDNA FLJ58984, highly similar to TRAF and TNF receptor-associated protein;cDNA FLJ51984, highly similar to TRAF and TNF receptor-associated protein	0.13171						0.32163
AAAEELLAR	942.513	IPI00016932	Phosphatidylinositol-3,4,5-trisphosphate 5-phosphatase 2;SH2 domain-containing inositol-5'-phosphatase 2;Inositol polyphosphate phosphatase-like protein 1;Protein 51C;Inositol polyphosphate phosphatase-like 1;Inositol polyphosphate phosphatase-like 1, isoform CRA_b	0.0048291		4.4892
AAAEGLMSLLR	1130.61	IPI00794278	Cell division cycle protein 27 homolog;H-NUC;cDNA FLJ57525, highly similar to Cell division cycle protein 27 homolog	5.5434e-05			0.85092
AAAEPSPR	797.403	IPI00939144	Pyrroline-5-carboxylate reductase 3;Pyrroline-5-carboxylate reductase-like protein;cDNA FLJ57148, highly similar to Homo sapiens pyrroline-5-carboxylate reductase-like (PYCRL), mRNA;cDNA FLJ57147, highly similar to Homo sapiens pyrroline-5-carboxylate reductase-like (PYCRL), mRNA	0.37971			1.0988			0.73896
AAAEVAGQFVIK	1202.67	IPI00022462	Transferrin receptor protein 1;T9;p90;Transferrin receptor protein 1, serum form;cDNA FLJ75881, highly similar to Homo sapiens transferrin receptor (p90, CD71) (TFRC), mRNA;Transferrin receptor (P90, CD71);Transferrin receptor (P90, CD71), isoform CRA_a;cDNA FLJ57106, highly similar to Transferrin receptor protein 1	8.1906e-14	0.43755	0.5982	0.68852	1.193	0.72491		1.0876	0.39339	0.49182
AAAEVNQDYGLDPK	1489.7	IPI00296053	Fumarate hydratase, mitochondrial;Fumarate hydratase;Fumarate hydratase, isoform CRA_c;cDNA, FLJ92753, Homo sapiens fumarate hydratase (FH), nuclear gene encodingmitochondrial protein, mRNA	1.247e-25			0.32941		0.093447	0.1212			0.39681
AAAFEEQENETVVVK	1662.81	IPI00298994	Talin-1;Talin 1	5.0621e-54		0.36007			1.5555
AAAFEQLQK	1004.53	IPI00015602	Mitochondrial import receptor subunit TOM70;Mitochondrial precursor proteins import receptor;Translocase of outer membrane 70 kDa subunit;cDNA FLJ90621 fis, clone PLACE1002547, highly similar to Mitochondrial proteins import receptor;cDNA FLJ57240, highly similar to Mitochondrial proteins import receptor	0.00013843		1.2109		0.33559		0.21926	1.4978	1.2072	0.71427
AAAGAAATHLEVAR	1307.69	IPI00465308	GPI transamidase component PIG-S;Phosphatidylinositol-glycan biosynthesis class S protein;cDNA, FLJ95416, highly similar to Homo sapiens phosphatidylinositol glycan, class S (PIGS), mRNA;cDNA PSEC0119 fis, clone PLACE1002376, highly similar to GPI transamidase component PIG-S	4.3015e-95	0.69823	1.2751	0.8208	0.72009	0.92628	0.75111	0.75314		0.9833
AAAGALER	757.408	IPI00748807	Nuclear pore complex protein Nup160;Nucleoporin Nup160;160 kDa nucleoporin	0.016114			1.0131			1.7788			1.4173
AAAGARPVELGFAESAPAWR	2026.04	IPI00001427	Programmed cell death protein 2;Zinc finger protein Rp-8;Zinc finger MYND domain-containing protein 7;Programmed cell death 2 isoform 2;cDNA FLJ55102, highly similar to Programmed cell death protein 2;Programmed cell death 2 isoform 1;Programmed cell death 2;PDCD2 protein	3.8973e-27							2.3255
AAAGEFADDPCSSVK	1523.66	IPI00215948	Catenin alpha-1;Cadherin-associated protein;Alpha E-catenin;NY-REN-13 antigen;cDNA FLJ36832 fis, clone ASTRO2010799, highly similar to ALPHA-1 CATENIN;cDNA FLJ54052, highly similar to Alpha-1 catenin (Cadherin-associated protein);cDNA FLJ54547, highly similar to Alpha-1 catenin (Cadherin-associated protein);cDNA FLJ54047, highly similar to Alpha-1 catenin (Cadherin-associated protein);CTNNA1 prot…	6.4616e-42	0.7003	0.34643	0.93256		2.2162	3.3727	0.53401		0.31883
AAAGELQEDSGLMALAK	1673.83	IPI00031091	EF-hand domain-containing protein D1;EF-hand domain-containing protein 1;Swiprosin-2;cDNA FLJ51583, highly similar to EF-hand domain-containing protein 1 (Swiprosin-2);EF hand domain family, member D1 variant;MSTP133;Putative uncharacterized protein FLJ13612;Putative uncharacterized protein DKFZp781H0842;Putative uncharacterized protein PP1187	2.8758e-46
AAAGGGGGGAAAAGR	1070.52	IPI00007755	Ras-related protein Rab-21;KIAA0118 protein	3.0583e-89			0.35344			1.0841	1.9577	1.6229
AAAGLGGGDSGDGTAR	1331.61	IPI00744637	RUN and FYVE domain-containing protein 1;FYVE-finger protein EIP1;Zinc finger FYVE domain-containing protein 12;La-binding protein 1;Rab4-interacting protein;cDNA FLJ78384, highly similar to Homo sapiens RUN and FYVE domain containing 1 (RUFY1), mRNA;Putative uncharacterized protein RUFY1	2.2979e-37			1.3066			2.1378			1.4949
AAAGLTVTVTHSNEK	1497.78	IPI00300531	BAG family molecular chaperone regulator 1;Bcl-2-associated athanogene 1;Glucocorticoid receptor-associated protein RAP46;BCL2-associated athanogene isoform 1L variant;BCL2-associated athanogene;BCL2-associated athanogene, isoform CRA_a;BCL2-associated athanogene, isoform CRA_b	0.0026593				0.63479
AAAGYPDPYSR	1166.54	IPI00010951	Epiplakin;450 kDa epidermal antigen;Putative uncharacterized protein DKFZp434G0719	0.0047813			0.72083
AAAHCAHVFTTVSQITAIEAQHLLK	2716.41	IPI00303868	Glycogen [starch] synthase, muscle;cDNA FLJ76881, highly similar to Homo sapiens glycogen synthase 1 (muscle) (GYS1), mRNA;cDNA FLJ54059, highly similar to Glycogen (starch) synthase, muscle (EC 2.4.1.11);cDNA FLJ53681, highly similar to Glycogen (starch) synthase, muscle (EC 2.4.1.11);Glycogen synthase 1 (Muscle) variant;cDNA FLJ59500, highly similar to Glycogen (starch) synthase, muscle (EC 2.4…	1.3241e-33		0.7669				0.556	1.0112	0.70733	0.36379
AAAHHYGAQCDKPNKEFMLCR	2503.13	IPI00219034	NADH dehydrogenase [ubiquinone] 1 alpha subcomplex subunit 8;NADH-ubiquinone oxidoreductase 19 kDa subunit;Complex I-19kD;Complex I-PGIV;NADH dehydrogenase (Ubiquinone) 1 alpha subcomplex, 8, 19kDa;cDNA, FLJ94833, Homo sapiens NADH dehydrogenase (ubiquinone) 1 alpha subcomplex, 8, 19kDa (NDUFA8), mRNA;cDNA FLJ52138, highly similar to NADH dehydrogenase (ubiquinone) 1 alpha subcomplex subunit 8 (E…	0.19694			1.3386			0.44083
AAAIGIDLGTTYSCVGVFQHGK	2264.13	IPI00304925	Heat shock 70 kDa protein 1;HSP70.1;HSP70-1/HSP70-2;Heat shock 70kDa protein 1A;Heat shock 70kDa protein 1B;cDNA FLJ75127, highly similar to Homo sapiens heat shock 70kDa protein 1A, mRNA;cDNA FLJ54328, highly similar to Heat shock 70 kDa protein 1;cDNA FLJ54283, highly similar to Heat shock 70 kDa protein 1;Heat shock protein 72;cDNA FLJ53752, highly similar to Heat shock 70 kDa protein 1;cDNA F…	1.0214e-128	0.85061	0.78172	0.65739	2.2108	2.6871	1.7397	2.08
AAALAAAVAQDPAASGAPSS	1695.84	IPI00552587	Growth arrest and DNA-damage-inducible proteins-interacting protein 1;CR6-interacting factor 1;CKII beta-associating protein;Papillomavirus L2-interacting nuclear protein 1;p53-responsive gene 6 protein;CKII beta binding protein 2	4.1488e-36
AAALATVNAWAEQTGMK	1731.86	IPI00921422	Cytoskeleton-associated protein 5;Colonic and hepatic tumor over-expressed protein;Ch-TOG protein;CKAP5 protein	3.3382e-73	1.0057	1.0239					0.8865	0.99138
AAALEAMK	803.421	IPI00013894	Stress-induced-phosphoprotein 1;Hsc70/Hsp90-organizing protein;Transformation-sensitive protein IEF SSP 3521;NY-REN-11 antigen;cDNA FLJ76863, highly similar to Homo sapiens stress-induced-phosphoprotein 1 (Hsp70/Hsp90-organizing protein) (STIP1), mRNA;STIP1 protein;cDNA FLJ54451, highly similar to Stress-induced-phosphoprotein 1	0.0079231	2.199	3.685		1.7247			3.1571
AAALEAMKDYTK	1310.65	IPI00013894	Stress-induced-phosphoprotein 1;Hsc70/Hsp90-organizing protein;Transformation-sensitive protein IEF SSP 3521;NY-REN-11 antigen;cDNA FLJ76863, highly similar to Homo sapiens stress-induced-phosphoprotein 1 (Hsp70/Hsp90-organizing protein) (STIP1), mRNA;STIP1 protein;cDNA FLJ54451, highly similar to Stress-induced-phosphoprotein 1	0.5647			2.0875			1.1197			1.7661
AAALEFLNR	1003.55	IPI00013894	Stress-induced-phosphoprotein 1;Hsc70/Hsp90-organizing protein;Transformation-sensitive protein IEF SSP 3521;NY-REN-11 antigen	2.4899e-07	2.6196	2.8094		1.4728	1.7212		2.9244	3.2448	2.1923
AAALEFLNRFEEAK	1607.83	IPI00013894	Stress-induced-phosphoprotein 1;Hsc70/Hsp90-organizing protein;Transformation-sensitive protein IEF SSP 3521;NY-REN-11 antigen	1.8407e-21	3.0258	3.5055	2.7783		2.2304	1.6112	3.949	0.99096	2.6754
AAALEFLNRFEEAKR	1763.93	IPI00013894	Stress-induced-phosphoprotein 1;Hsc70/Hsp90-organizing protein;Transformation-sensitive protein IEF SSP 3521;NY-REN-11 antigen	0.24382						1.2183			2.4847
AAALVLQTIWGYK	1432.81	IPI00219868	Catenin delta-1;p120 catenin;Cadherin-associated Src substrate;p120(cas);Putative uncharacterized protein DKFZp781O2021;Catenin (Cadherin-associated protein), delta 1;CTNND1 protein	3.6459e-34	0.54694	0.67669	0.76782	0.81561		0.65779	0.45502	0.30873	0.44495
AAAMDVDTPSGTNSGAGK	1648.74	IPI00003386	RING-box protein 1;Regulator of cullins 1;RING finger protein 75;Protein ZYP;Ring-box 1, isoform CRA_b;cDNA, FLJ96824, Homo sapiens ring-box 1 (RBX1), mRNA	7.1535e-62	0.71043	0.72237			0.86362	1.1889		1.4103
AAAMDVDTPSGTNSGAGKK	1776.83	IPI00003386	RING-box protein 1;Regulator of cullins 1;RING finger protein 75;Protein ZYP;Ring-box 1, isoform CRA_b;cDNA, FLJ96824, Homo sapiens ring-box 1 (RBX1), mRNA	4.9214e-50	0.81589	0.87811	0.84382		0.82751	3.8464	1.3487
AAAMTPPEEELKR	1441.72	IPI00927682	Rab3 GTPase-activating protein catalytic subunit;RAB3 GTPase-activating protein 130 kDa subunit;Rab3-GAP p130;RAB3GAP1 protein;RAB3 GTPase activating protein subunit 1;RAB3 GTPase activating protein subunit 1 (Catalytic), isoform CRA_d	0.0084508		0.93661	0.47591			0.55688			0.37313
AAAMVPGR	771.406	IPI00007926	Deoxyribonucleoside 5'-monophosphate N-glycosidase;c-Myc-responsive protein Rcl;Putative uncharacterized protein C6orf108	0.033533		3.2011		1.2836			2.4761		1.1222
AAANEQLTR	972.499	IPI00926903	Coiled-coil-helix-coiled-coil-helix domain-containing protein 3, mitochondrial;Coiled-coil-helix-coiled-coil-helix domain containing 3, isoform CRA_d;Coiled-coil-helix-coiled-coil-helix domain containing 3;cDNA FLJ53726, highly similar to Coiled-coil-helix-coiled-coil-helixdomain-containing protein 3	0.57928			0.91409
AAANFFSASCVPCADQSSFPK	2260.99	CON_00788576		1.8644e-48	0.0057231	0.0020694	0.039884		0.019718	0.014703	0.00043765	0.0046066	0.027414
AAAPAPEEEMDECEQALAAEPK	2356.02	IPI00937615	Elongation factor 1-gamma;eEF-1B gamma;Eukaryotic translation elongation factor 1 gamma;GIG35;EEF1G protein;Eukaryotic translation elongation factor 1 gamma, isoform CRA_c;cDNA FLJ56389, highly similar to Elongation factor 1-gamma	1.6508e-85	1.2364	1.4812	1.1115		3.585	2.6262	2.5306	2.4728	1.8023
AAAPAPVSEAVCR	1297.64	IPI00761160	Calpastatin;Calpain inhibitor;Sperm BS-17 component;cDNA FLJ56123, highly similar to Calpastatin;cDNA FLJ50632, highly similar to Calpastatin;Heart-type calpastatin;cDNA FLJ59277, highly similar to Calpastatin;Calpastatin isoform a variant;cDNA FLJ56102, highly similar to Homo sapiens calpastatin (CAST), transcript variant 8, mRNA;CAST protein;cDNA FLJ52193, highly similar to Calpastatin;Calpasta…	1.002e-43		6.3278	23.682	1.3	1.6619	0.25628	0.3199	0.28037	0.23532
AAAPAPVSEAVSR	1224.65	IPI00302047	cDNA FLJ77693, highly similar to Homo sapiens calpastatin (CAST), transcript variant 3, mRNA;cDNA FLJ77737, highly similar to Homo sapiens calpastatin (CAST), transcript variant 3, mRNA;Testis calpastatin	1.7406e-15	0.013717	0.037389	0.080985	0.16251			0.012083		0.019706
AAAPGVEDEPLLR	1336.7	IPI00011118	Ribonucleoside-diphosphate reductase subunit M2;Ribonucleotide reductase small subunit;Ribonucleotide reductase small chain;cDNA FLJ35352 fis, clone PUAEN1000121, highly similar to Ribonucleoside-diphosphate reductase M2 subunit (EC 1.17.4.1);cDNA FLJ16813 fis, clone THYMU3030231, highly similar to Ribonucleoside-diphosphate reductase M2 subunit;Similar to ribonucleotide reductase protein r2 clas…	0.0084508	1.0389								6.0403
AAAPLFTGFLVLHSEPR	1824.99	IPI00889514	HEAT repeat-containing protein 7A;cDNA FLJ56026;HEATR7A protein	1.6781e-12	0.81496	1.9944	0.71101			0.34408			0.36708
AAAPPSYCFVAFPPR	1649.8	IPI00923582	cDNA FLJ59687, highly similar to Secernin-1;Secernin-1;cDNA FLJ75484, highly similar to Homo sapiens secernin 1 (SCRN1), mRNA;Secernin 1, isoform CRA_b;cDNA FLJ54276, highly similar to Secernin-1;Putative uncharacterized protein SCRN1	5.4993e-05	1.5478	1.9134		1.2823				1.3561
AAAPQAWAGPMEEPPQAQAPPR	2270.09	IPI00794221	Putative uncharacterized protein DBN1;Drebrin;Developmentally-regulated brain protein;cDNA FLJ36806 fis, clone ASTRO1000165, highly similar to Drebrin;Drebrin 1, isoform CRA_d;cDNA FLJ53620, highly similar to Drebrin	5.9959e-08	0.1542		0.017906						0.13112
AAAPRPPVSAASGRPQDDTDSSR	2308.12	IPI00435947	WAS/WASL-interacting protein family member 2;WIP-related protein;WASP-interacting protein-related protein;WIP- and CR16-homologous protein;cDNA FLJ75102, highly similar to Homo sapiens WIRE protein (WIRE), mRNA;cDNA FLJ77749, highly similar to Homo sapiens WIRE protein (WIRE), mRNA;cDNA FLJ78696, highly similar to Homo sapiens WIRE protein (WIRE), mRNA;cDNA, FLJ79485, highly similar to WIP-relate…	0.056637	0.85987				0.76861
AAAQCYIDLIIK	1377.73	IPI00295851	Coatomer subunit beta;Beta-coat protein	2.8045e-47	1.3253	1.4129		0.96992		1.2794	0.37376	0.81772	1.0425
AAAQCYIDLIIKESDNNVK	2164.08	IPI00295851	Coatomer subunit beta;Beta-coat protein	0.00034495						0.85988
AAAQEQYSAAVAR	1334.66	CON_00717930		1.0115e-31	0.51118	0.054748	0.0031855				0.011718
AAAQEQYSAAVARGESAGLVR	2104.07	CON_00717930		0.024176
AAAQLLQSQAQQSGAQQTK	1956	IPI00019376	Septin-11;cDNA FLJ53374, highly similar to Septin-11;Putative uncharacterized protein FLJ10849;cDNA FLJ14373 fis, clone HEMBA1001595, highly similar to SEPTIN 2 HOMOLOG;Putative uncharacterized protein DKFZp566C224	4.9214e-50		0.58748					0.42902
AAAQYYLGNFR	1272.63	IPI00000606	Tetratricopeptide repeat protein 4;Tetratricopeptide repeat domain 4;Tetratricopeptide repeat domain 4, isoform CRA_a	0.00012968	1.4505
AAASGSVLQR	958.52	IPI00059762	Lysophospholipase-like protein 1;cDNA FLJ77315, highly similar to Homo sapiens lysophospholipase-like 1 (LYPLAL1), mRNA;cDNA FLJ41634 fis, clone FCBBF4000076, highly similar to Lysophospholipase-like protein 1 (EC 3.1.2.-);Lysophospholipase-like 1, isoform CRA_a	1.0307e-05	0.40855	0.73763	0.55089	0.073846	0.0837	0.149	0.55594	0.29913	0.1798
AAASLAAVSGTAAASLGSAQPTDLGAHK	2493.28	IPI00376199	Interferon regulatory factor 2-binding protein 2;Interferon regulatory factor 2 binding protein 2;cDNA FLJ52600, highly similar to Homo sapiens interferon regulatory factor 2 binding protein 2 (IRF2BP2), mRNA	2.2366e-132	0.1724	0.15923		0.14967	0.065841		0.19554	0.22033
AAATAEEPDPK	1098.52	IPI00017763	Nucleosome assembly protein 1-like 4;Putative uncharacterized protein NAP1L4;cDNA, FLJ92975, highly similar to Homo sapiens nucleosome assembly protein 1-like 4 (NAP1L4), mRNA;cDNA FLJ59403, highly similar to Nucleosome assembly protein 1-like 4;cDNA, FLJ79141, highly similar to Nucleosome assembly protein 1-like 4;cDNA, FLJ79223, highly similar to Nucleosome assembly protein 1-like 4;cDNA, FLJ79…	0.0047813									0.34781
AAATGAVAASAASGQAEGKK	1715.88	IPI00792743	SAFB-like transcription modulator;Modulator of estrogen-induced transcription;Putative uncharacterized protein SLTM	1.6622e-45				0.76155
AAATGLPEGPAVPVPSR	1588.86	IPI00477112	Zinc transporter ZIP11;Zrt- and Irt-like protein 11;Solute carrier family 39 member 11;Solute carrier family 39 (Metal ion transporter), member 11, isoform CRA_a;cDNA, FLJ93908	2.4685e-31	0.59955	1.2108		0.12057	0.080385	0.1545
AAATGPSFWLGNETLK	1661.84	IPI00257882	Xaa-Pro dipeptidase;Proline dipeptidase;Imidodipeptidase;Peptidase D;cDNA FLJ75447, highly similar to Homo sapiens peptidase D, mRNA;cDNA FLJ78212, highly similar to Human prolidase (imidodipeptidase) mRNA;cDNA FLJ78243, highly similar to Homo sapiens peptidase D, mRNA;Putative uncharacterized protein PEPD;cDNA FLJ58179, highly similar to Xaa-Pro dipeptidase (EC 3.4.13.9);cDNA FLJ57945, highly si…	1.3625e-87	0.45166	0.6097	0.36709			0.65806	1.5133	1.2713
AAATLTSKLYSLLFR	1653.95	IPI00554701	Cytochrome b-c1 complex subunit 9;Ubiquinol-cytochrome c reductase complex 7.2 kDa protein;Cytochrome c1 non-heme 7 kDa protein;Complex III subunit X;Complex III subunit 9;HSPC051;Ubiquinol-cytochrome c reductase complex (7.2 kD), isoform CRA_a;HSPC151;Putative uncharacterized protein ENSP00000384962	1							2.5323
AAATPESQEPQAK	1326.64	IPI00641181	MARCKS-related protein;MARCKS-like protein 1;Macrophage myristoylated alanine-rich C kinase substrate	1.6607e-08		4.1632	2.6229			0.69943			4.351
AAATTSQPVLTSQQIETIFFK	2280.2	IPI00004497	Breakpoint cluster region protein;Renal carcinoma antigen NY-REN-26;cDNA FLJ58654, highly similar to Breakpoint cluster region protein (EC 2.7.11.1);Bcr-abl mRNA of acute lymphocytic leukaemia (ALL) patients;BCR	8.0293e-19	0.89346				1.8007			0.47668
AAAVAAAGAGEPQSPDELLPK	1962.01	IPI00024976	Mitochondrial import receptor subunit TOM22 homolog;Translocase of outer membrane 22 kDa subunit homolog;1C9-2;Mitochondrial import receptor Tom22 variant;HCG2010808, isoform CRA_a;MSTP065;Translocase of outer mitochondrial membrane 22 homolog (Yeast);cDNA, FLJ92357, Homo sapiens translocase of outer mitochondrial membrane 22 homolog(yeast) (TOMM22), mRNA	3.7302e-62	0.57665	0.15069		0.51805	0.063137			0.60412
AAAVADEAVAR	1042.54	IPI00018196	Notchless protein homolog 1;Notchless gene homolog variant	0.0013428	0.55059		0.62048		0.36042
AAAVAVAAASR	956.54	IPI00376199	Interferon regulatory factor 2-binding protein 2;Interferon regulatory factor 2 binding protein 2;cDNA FLJ52600, highly similar to Homo sapiens interferon regulatory factor 2 binding protein 2 (IRF2BP2), mRNA	2.1196e-14	0.22522	0.17045	0.16568	0.17256	0.072568	0.16322			0.45539
AAAVLPVLDLAQR	1335.79	IPI00646556	NADH dehydrogenase [ubiquinone] flavoprotein 2, mitochondrial;NADH-ubiquinone oxidoreductase 24 kDa subunit;cDNA FLJ78041, highly similar to Homo sapiens NADH dehydrogenase (ubiquinone) flavoprotein 2, 24kDa (NDUFV2), mRNA;NDUFV2 protein;NADH dehydrogenase (Ubiquinone) flavoprotein 2, 24kDa;cDNA, FLJ92411, Homo sapiens NADH dehydrogenase (ubiquinone) flavoprotein 2, 24kDa(NDUFV2), mRNA;24-kDa sub…	3.6459e-34	1.4967	0.84921	1.4548	0.60525	0.21529	0.48747	0.82771	0.78838	0.95818
AAAVLSGPSAGSAAGVPGGTGGLSAVSSGPR	2565.31	IPI00787089	Proline-, glutamic acid- and leucine-rich protein 1;Modulator of non-genomic activity of estrogen receptor;Transcription factor HMX3;Putative uncharacterized protein PELP1;Proline and glutamic acid rich nuclear protein isoform	1.8516e-45	1.2087	0.37725		1.6169
AAAVPQR	711.403	IPI00024157	FK506-binding protein 3;Peptidyl-prolyl cis-trans isomerase;25 kDa FKBP;FKBP-25;Rapamycin-selective 25 kDa immunophilin;FK506 binding protein 3, 25kDa;cDNA, FLJ92182, Homo sapiens FK506 binding protein 3, 25kDa (FKBP3), mRNA;FK506-binding protein 3 variant	0.034332		1.8702
AAAVPVEFQEHHLSEVQNMASEEK	2679.26	IPI00304417	Isocitrate dehydrogenase [NAD] subunit beta, mitochondrial;Isocitric dehydrogenase;NAD(+)-specific ICDH;Isocitrate dehydrogenase 3 (NAD+) beta, isoform CRA_c;cDNA, FLJ96729, Homo sapiens isocitrate dehydrogenase 3 (NAD+) beta (IDH3B),nuclear gene encoding mitochondrial protein, transcript variant 1,mRNA;cDNA FLJ57795, highly similar to Isocitrate dehydrogenase	8.1781e-11		0.85904			0.72356
AAAVRQDLAQLMNSSGSHK	1983	IPI00171844	COP9 signalosome complex subunit 4;JAB1-containing signalosome subunit 4;cDNA FLJ10286 fis, clone HEMBB1001384, highly similar to COP9 signalosome complex subunit 4;cDNA FLJ13943 fis, clone Y79AA1000966, highly similar to COP9 signalosome complex subunit 4;COP9 constitutive photomorphogenic homolog subunit 4 (Arabidopsis), isoform CRA_b;cDNA FLJ36919 fis, clone BRACE2003987, highly similar to COP…	8.6613e-21		1.6873					1.1501	0.97525
AAAVSSVVR	858.492	IPI00374272	UPF0600 protein C5orf51	0.00013843		1.6072	1.3491	1.2094		0.83836	0.065484	1.7503	1.0806
AAAVVGINSETIMK	1402.75	IPI00011307	Bifunctional methylenetetrahydrofolate dehydrogenase/cyclohydrolase, mitochondrial;NAD-dependent methylenetetrahydrofolate dehydrogenase;Methenyltetrahydrofolate cyclohydrolase;cDNA, FLJ93628, Homo sapiens methylene tetrahydrofolate dehydrogenase (NAD+dependent), methenyltetrahydrofolate cyclohydrolase (MTHFD2),nuclear gene encoding mitochondrial protein, mRNA	5.7935e-64	0.48559	0.44667			6.4556		1.7465	1.4108
AAAYLDPNLNHTPNSSTK	1912.93	IPI00413961	cDNA FLJ61553, highly similar to Focal adhesion kinase 1 (EC 2.7.10.2);Putative uncharacterized protein DKFZp666O0110;Focal adhesion kinase 1;pp125FAK;Protein-tyrosine kinase 2;PTK2 protein tyrosine kinase 2 isoform b variant;cDNA FLJ37680 fis, clone BRHIP2012923, highly similar to FOCAL ADHESION KINASE 1 (EC 2.7.1.112);PTK2 protein	5.8284e-44	1.125						1.2887		1.0037
AAAYNLVQHGITNLCVIGGDGSLTGANIFR	3101.57	IPI00332371	6-phosphofructokinase, liver type;Phosphofructokinase 1;Phosphohexokinase;Phosphofructo-1-kinase isozyme B;cDNA FLJ30173 fis, clone BRACE2000969, highly similar to 6-phosphofructokinase, liver type (EC 2.7.1.11);cDNA FLJ61026, highly similar to Homo sapiens phosphofructokinase, liver (PFKL), transcript variant 1, mRNA;Putative uncharacterized protein DKFZp686L2097;PFKL protein;Putative uncharacte…	8.5143e-60					0.95583		0.64184	0.8345
AACIAEQYHTVLK	1502.76	IPI00029422	Kinesin-like protein KIF20A;Rabkinesin-6;Rab6-interacting kinesin-like protein;GG10_2;cDNA FLJ55710, highly similar to Kinesin family member 20A	0.0026564			0.72009	0.67938		2.1621			4.6791
AACLESAQEPAGAWGNK	1758.8	IPI00894287	cDNA FLJ56889, moderately similar to Vigilin;HDLBP protein	1.0094e-115	1.3263	1.1937	1.1981		2.2995		0.80878		0.88635
AACLLDGVPVALK	1325.74	IPI00152658	Serine/threonine-protein kinase Nek7;NimA-related protein kinase 7;cDNA, FLJ93949, highly similar to Homo sapiens NIMA (never in mitosis gene a)-related kinase 7 (NEK7), mRNA;NIMA (Never in mitosis gene a)-related kinase 7, isoform CRA_b;Putative uncharacterized protein NEK7	4.8196e-06	0.2647	0.25274			0.60869		0.29869
AACQEAQVFGNQLIPPNAQVK	2282.15	IPI00019353	Acylglycerol kinase, mitochondrial;Multiple substrate lipid kinase;Multiple substrate lipid kinase, isoform CRA_a;Putative uncharacterized protein FLJ10842;cDNA FLJ59963, highly similar to Homo sapiens multiple substrate lipid kinase (MULK), mRNA;cDNA FLJ61206, highly similar to Homo sapiens multiple substrate lipid kinase (MULK), mRNA	0.041014	1.0616
AACYFTMGLYEK	1452.64	IPI00099131	Zinc finger CCCH domain-containing protein 7B;Rotavirus 'X'-associated non-structural protein	1.3268e-05	0.72463
AADAEAEVASLNR	1315.64	IPI00183968	Tropomyosin alpha-3 chain;Tropomyosin-3;Gamma-tropomyosin;Tropomyosin-5	4.8196e-06	0.64194				0.29753	0.45206			0.6744
AADAEAEVASLNRR	1471.74	IPI00183968	Tropomyosin alpha-3 chain;Tropomyosin-3;Gamma-tropomyosin;Tropomyosin-5	1	0.36472								0.7489
AADALEEQQR	1129.54	IPI00006196	Nuclear mitotic apparatus protein 1;SP-H antigen;cDNA FLJ76708, highly similar to Homo sapiens nuclear mitotic apparatus protein 1 (NUMA1), mRNA;NUMA1 protein;Nuclear mitotic apparatus protein 1 variant;Putative uncharacterized protein;Nuclear mitotic apparatus protein;NUMA1 variant protein	0.00029384			1.9185			1.0615			2.3293
AADAVEDLR	958.472	IPI00027009	Protein kinase C and casein kinase substrate in neurons protein 2;PACSIN2 protein;Protein kinase C and casein kinase substrate in neurons 2	0.0049144	0.55679		0.27555		0.64244	0.62433			0.71562
AADCEVEQWDSDEPIPAK	2058.88	IPI00037448	Glyoxylate reductase/hydroxypyruvate reductase;Glyoxylate reductase/hydroxypyruvate reductase, isoform CRA_b;cDNA, FLJ96788, Homo sapiens glyoxylate reductase/hydroxypyruvate reductase(GRHPR), mRNA	7.1535e-62		0.84481			0.37064
AADCEVEQWDSDEPIPAKELER	2586.15	IPI00037448	Glyoxylate reductase/hydroxypyruvate reductase;Glyoxylate reductase/hydroxypyruvate reductase, isoform CRA_b;cDNA, FLJ96788, Homo sapiens glyoxylate reductase/hydroxypyruvate reductase(GRHPR), mRNA	8.8834e-63						0.47199			0.4415
AADEALNAMTSNGSHR	1643.73	IPI00299063	Stromal interaction molecule 1	0.0037254	0.15543
AADEAMEER	1020.42	IPI00020508	N(2),N(2)-dimethylguanosine tRNA methyltransferase;tRNA(guanine-26,N(2)-N(2)) methyltransferase;tRNA 2,2-dimethylguanosine-26 methyltransferase;tRNA(m(2,2)G26)dimethyltransferase;cDNA FLJ77676, highly similar to Homo sapiens TRM1 tRNA methyltransferase 1 homolog (S. cerevisiae) (TRMT1), mRNA;cDNA FLJ54678, highly similar to N(2),N(2)-dimethylguanosine tRNA methyltransferase (EC 2.1.1.32);cDNA FLJ…	0.034855			1.0203			0.92335
AADEEAFEDNSEEYIRR	2042.88	IPI00022744	Exportin-2;Importin-alpha re-exporter;Chromosome segregation 1-like protein;Cellular apoptosis susceptibility protein;HCG2019736, isoform CRA_a;cDNA, FLJ92611, highly similar to Homo sapiens CSE1 chromosome segregation 1-like (yeast) (CSE1L), mRNA;cDNA FLJ53202, highly similar to Exportin-2;Cellular apoptosis susceptibility protein variant 2;cDNA FLJ59343, highly similar to Exportin-2;cDNA FLJ593…	0.00084319	0.66406		0.6115		0.95968	0.74568			0.70051
AADEIEKEKELLIHER	1922.01	IPI00101734	Protein FAM105B	0.086553			0.444						0.42372
AADEVLAEAK	1015.52	IPI00300659	Parafibromin;Cell division cycle protein 73 homolog;Hyperparathyroidism 2 protein;cDNA FLJ57893, highly similar to Parafibromin;Putative uncharacterized protein CDC73	0.0015713									1.4414
AADFIDQALAQK	1289.66	IPI00790757	Dual specificity protein phosphatase 3;Dual specificity protein phosphatase VHR;Dual specificity phosphatase 3;Dual specificity phosphatase 3 (Vaccinia virus phosphatase VH1-related);Dual specificity phosphatase 3 (Vaccinia virus phosphatase VH1-related), isoform CRA_a;DUSP3 protein	9.6207e-30	0.60262	1.0272	0.71436				0.7497	0.66386	0.53889
AADFQLHTHVNDGTEFGGSIYQK	2534.18	IPI00031804	Voltage-dependent anion-selective channel protein 3;Outer mitochondrial membrane protein porin 3	3.4631e-16	0.69381	0.13186		0.48533	0.14035				0.59106
AADFSDPAFLAHTNR	1631.77	CON_00688367		2.3922e-48	0.031677		0.071737		0.064919
AADGGERPLAASPPGTVK	1692.88	IPI00295502	Protein Wiz;Widely-interspaced zinc finger-containing protein;Zinc finger protein 803;cDNA FLJ16541 fis, clone OCBBF2034823, highly similar to Mus musculus widely-interspaced zinc finger motifs (Wiz), transcript variant 1, mRNA;WIZ protein;cDNA FLJ33864 fis, clone CTONG2006412, highly similar to Mus musculus widely-interspaced zinc finger motifs (Wiz), transcript variant 1, mRNA	3.3526e-07	0.18491	0.45352
AADHLKPFLDDSTLR	1697.87	IPI00005861	U4/U6 small nuclear ribonucleoprotein Prp3;Pre-mRNA-splicing factor 3;U4/U6 snRNP 90 kDa protein;cDNA, FLJ93335, highly similar to Homo sapiens PRP3 pre-mRNA processing factor 3 homolog (yeast) (PRPF3), mRNA;cDNA FLJ55983, highly similar to U4/U6 small nuclear ribonucleoprotein Prp3;cDNA FLJ50652, highly similar to U4/U6 small nuclear ribonucleoprotein Prp3;PRP3 pre-mRNA processing factor 3 homol…	3.0774e-24	1.2859	1.276	1.4963		1.5904	1.801		9.2937	3.5967
AADIDQEVK	987.487	IPI00100160	Cullin-associated NEDD8-dissociated protein 1;Cullin-associated and neddylation-dissociated protein 1;p120 CAND1;TBP-interacting protein TIP120A;TBP-interacting protein of 120 kDa A;cDNA FLJ77762, highly similar to Homo sapiens cullin-associated and neddylation-dissociated 1 (CAND1), mRNA;Cullin-associated and neddylation-dissociated 1, isoform CRA_b;cDNA, FLJ95126, Homo sapiens TBP-interacting p…	2.4899e-07		0.74672	0.27146		1.6893	1.1436		0.87335	1.3895
AADIDQEVKER	1272.63	IPI00100160	Cullin-associated NEDD8-dissociated protein 1;Cullin-associated and neddylation-dissociated protein 1;p120 CAND1;TBP-interacting protein TIP120A;TBP-interacting protein of 120 kDa A;cDNA FLJ77762, highly similar to Homo sapiens cullin-associated and neddylation-dissociated 1 (CAND1), mRNA;Cullin-associated and neddylation-dissociated 1, isoform CRA_b;cDNA, FLJ95126, Homo sapiens TBP-interacting p…	5.4093e-10			0.32409			0.96918			0.63395
AADIGVAMGQTGTDVCK	1692.78	IPI00745171	Calcium-transporting ATPase type 2C member 1;ATP-dependent Ca(2+) pump PMR1;cDNA FLJ55630, highly similar to Calcium-transporting ATPase type 2C member 1 (EC 3.6.3.8);ATPase, Ca++ transporting, type 2C, member 1, isoform CRA_d;ATPase, Ca++ transporting, type 2C, member 1, isoform CRA_c;cDNA, FLJ95103, highly similar to Homo sapiens ATPase, Ca++ transporting, type 2C, member 1 (ATP2C1),mRNA;cDNA F…	4.3964e-55		0.51981
AADISESSGADCK	1309.55	IPI00940755	Density-regulated protein;Protein DRP1;Smooth muscle cell-associated protein 3;cDNA FLJ60140, highly similar to Density-regulated protein	2.1069e-14	0.8097			1.125	1.3122			1.0379
AADISESSGADCKGDPR	1734.75	IPI00940755	Density-regulated protein;Protein DRP1;Smooth muscle cell-associated protein 3;cDNA FLJ60140, highly similar to Density-regulated protein	7.042e-05			0.64794			0.86335
AADISLDNLVEGK	1343.69	IPI00742743	Tumor suppressor p53-binding protein 1;cDNA FLJ56510, highly similar to Tumor suppressor p53-binding protein 1;Putative uncharacterized protein TP53BP1;cDNA FLJ78617;cDNA FLJ41424 fis, clone BRHIP2003748, highly similar to Tumor suppressor p53-binding protein 1	1.4349e-12						1.0305
AADKDTCFSTEGPNLVTR	1980.92	CON_MSA	Serum albumin	6.4968e-05									0.051123
AADKGVYIIGSSGFDSIPADLGVIYTR	2784.43	IPI00329600	Probable saccharopine dehydrogenase	2.6279e-12						0.031261
AADKLIQNLDANHDGR	1749.88	IPI00062120	Protein S100-A16;S100 calcium-binding protein A16;Protein S100F;Aging-associated gene 13 protein;cDNA FLJ76552, highly similar to Homo sapiens S100 calcium binding protein A16 (S100A16), mRNA;S100 calcium binding protein A16, isoform CRA_a	5.1655e-27			0.86476			0.23315			0.33241
AADLAHITAR	1037.56	IPI00096899	DNA replication factor Cdt1;Double parked homolog;CDT1 protein	0.01427						6.4269			12.753
AADLLAVHAVK	1106.64	IPI00797574	Protein FAM44A;cDNA FLJ54426	0.0013428			1.2484			2.1983			1.9994
AADLLAYIHK	1113.62	IPI00290032	Transient receptor potential cation channel subfamily M member 7;Long transient receptor potential channel 7;Channel-kinase 1	0.0041865		2.6127	1.7214	1.958		2.4127	2.4762	1.523	1.7604
AADLLLHSK	966.55	IPI00022608	Sortilin-related receptor;Sorting protein-related receptor containing LDLR class A repeats;SorLA-1;Low-density lipoprotein receptor relative with 11 ligand-binding repeats;Sortilin-related receptor, L(DLR class) A repeats-containing;Sortilin-related receptor, L(DLR class) A repeats-containing, isoform CRA_b;cDNA FLJ53877, highly similar to Sortilin-related receptor;cDNA, FLJ79239, highly similar …	0.23807						0.61973			2.2891
AADLLYAMCDR	1297.58	IPI00942271	cDNA FLJ36998 fis, clone BRACE2007295, highly similar to ALPHA-ADAPTIN A;AP-2 complex subunit alpha-1;Adapter-related protein complex 2 alpha-1 subunit;Adaptor protein complex AP-2 subunit alpha-1;Alpha1-adaptin;Plasma membrane adaptor HA2/AP2 adaptin alpha A subunit;Alpha-adaptin A;Clathrin assembly protein complex 2 alpha-A large chain;100 kDa coated vesicle protein A;cDNA FLJ61453, highly simi…	0.00012968	0.554	0.85847	0.51457		0.65177		0.83315		0.77834
AADLNGDLTATR	1216.6	IPI00015842	Reticulocalbin-1;cDNA FLJ55835, highly similar to Reticulocalbin-1;Proliferation-inducing gene 20 protein	1.9337e-34	1.6904	1.3925	1.413	1.3138	1.6	1.3473		1.2175	0.69213
AADLNGDLTATREEFTAFLHPEEFEHMK	3218.5	IPI00015842	Reticulocalbin-1;cDNA FLJ55835, highly similar to Reticulocalbin-1;Proliferation-inducing gene 20 protein	0.00068371							1.6151
AADLQLEMTQK	1246.62	IPI00788925	Branched-chain-amino-acid aminotransferase;Branched-chain-amino-acid aminotransferase, mitochondrial;Placental protein 18	0.00012968	0.58752	1.1799			0.96445
AADLQLEMTQKPHK	1608.83	IPI00788925	Branched-chain-amino-acid aminotransferase;Branched-chain-amino-acid aminotransferase, mitochondrial;Placental protein 18	0.0082927		1.0909		0.53971	0.61004		2.5399	2.4462	0.86899
AADMGNPVGQSGLGMAYLYGR	2126.99	IPI00002790	Protein sel-1 homolog 1;Suppressor of lin-12-like protein 1;SEL1L protein	9.6326e-170	1.4843	1.6887		0.64209	0.64981		1.7074	1.6346
AADMLSGPR	916.444	IPI00217871	Delta-1-pyrroline-5-carboxylate dehydrogenase, mitochondrial;Aldehyde dehydrogenase family 4 member A1;cDNA FLJ54479, highly similar to Delta-1-pyrroline-5-carboxylatedehydrogenase, mitochondrial (EC 1.5.1.12);Aldehyde dehydrogenase 4 family, member A1	0.0049144						0.17624			0.3078
AADPPAENSSAPEAEQGGAE	1896.8	IPI00031812	Nuclease-sensitive element-binding protein 1;Y-box-binding protein 1;Y-box transcription factor;YB-1;CCAAT-binding transcription factor I subunit A;Enhancer factor I subunit A;DNA-binding protein B;YBX1 protein;Nuclease sensitive element binding protein-1	6.5389e-42
AADRIHQDGIHILVNMNGYTK	2365.2	IPI00005780	UDP-N-acetylglucosamine--peptide N-acetylglucosaminyltransferase 110 kDa subunit;O-linked N-acetylglucosamine transferase 110 kDa subunit;O-GlcNAc transferase subunit p110;cDNA: FLJ23071 fis, clone LNG05694;HRNT1;O-linked N-acetylglucosamine (GlcNAc) transferase (UDP-N-acetylglucosamine:polypeptide-N-acetylglucosaminyl transferase), isoform CRA_a	0.091384		1.1987					0.97442
AADRLPNLSSPSAEGPPGPPSGPAPR	2494.26	IPI00941588	cDNA FLJ55958, highly similar to Target of Myb protein 1;Target of myb1 (Chicken);Target of myb1 (Chicken), isoform CRA_c;Target of Myb protein 1;cDNA FLJ54710, highly similar to Target of Myb protein 1;cDNA FLJ39747 fis, clone SMINT2017432, highly similar to Target of Myb protein 1;cDNA FLJ54073, highly similar to Target of Myb protein 1;cDNA FLJ54716, highly similar to Target of Myb protein 1	1.4851e-142	0.26041				0.24976		0.96083		0.20891
AADSICDGDLVDSQIR	1733.79	IPI00375358	Replication factor C subunit 1;Activator 1 subunit 1;Replication factor C large subunit;RF-C 140 kDa subunit;Activator 1 140 kDa subunit;Activator 1 large subunit;DNA-binding protein PO-GA;cDNA FLJ77148, highly similar to Homo sapiens replication factor C (activator 1) 1, 145kDa, mRNA;Replication factor C (Activator 1) 1, 145kDa, isoform CRA_b;LLDBP	1.387e-16	0.55564
AADSLQQNLQR	1242.63	IPI00554560	Protein C16orf88;Testis-specific gene 118 protein	3.8404e-06									2.8988
AADTDGDGQVNYEEFVR	1884.81	IPI00216984	Calmodulin-like protein 3;Calmodulin-related protein NB-1;CaM-like protein;Calmodulin-like 3;cDNA, FLJ94574, Homo sapiens calmodulin-like 3 (CALML3), mRNA	5.7597e-18							0.010806	0.0095013
AADTIGYPVMIR	1305.68	IPI00889534	Carbamoylphosphate synthetase I;Carbamoyl-phosphate synthase [ammonia], mitochondrial;Carbamoyl-phosphate synthetase I;cDNA FLJ75245, highly similar to Homo sapiens carbamoyl-phosphate synthetase 1, mitochondrial (CPS1), mRNA;Carbamoyl-phosphate synthetase 1, mitochondrial;Carbamoyl-phosphate synthetase 1, mitochondrial, isoform CRA_a;Putative uncharacterized protein CPS1;Carbamoyl-phosphate synt…	1.7311e-05		0.23445							0.039005
AADTQVSETLK	1161.59	IPI00001159	Translational activator GCN1;GCN1-like protein 1;cDNA FLJ54481, highly similar to GCN1-like protein 1	3.8404e-06	0.95929	1.7981	0.70567		1.215			0.80017
AADTQVSETLKR	1317.69	IPI00001159	Translational activator GCN1;GCN1-like protein 1;cDNA FLJ54481, highly similar to GCN1-like protein 1	9.622e-20			1.5205			0.85223			1.1961
AADVENVPPVISTPHHYLISIYR	2590.35	IPI00032459	AP-3 complex subunit mu-1;Adapter-related protein complex 3 mu-1 subunit;AP-3 adapter complex mu3A subunit;Mu-adaptin 3A;Mu3A-adaptin;Putative uncharacterized protein DKFZp586G1518;cDNA FLJ51284, highly similar to Adapter-relatedprotein complex 3 mu-1 subunit	2.4147e-22		0.70334	0.64668		0.4247	0.40691	0.54529	0.52312	0.40999
AADVSVTHRPPLSPK	1573.86	IPI00217670	Ribonucleoprotein PTB-binding 1;Protein raver-1	0.0004557	1.4455	1.9923		1.7135	1.9851		3.1119	3.7342
AAEAAAAPAESAAPAAGEEPSK	1965.93	IPI00299024	Brain acid soluble protein 1;Neuronal axonal membrane protein NAP-22;22 kDa neuronal tissue-enriched acidic protein	1.499e-102					0.23608			4.2115
AAEAAAAPAESAAPAAGEEPSKEEGEPK	2635.22	IPI00299024	Brain acid soluble protein 1;Neuronal axonal membrane protein NAP-22;22 kDa neuronal tissue-enriched acidic protein	2.5635e-36	1.0842	1.3094	0.42836				1.6146		0.56494
AAEAAINILK	1012.59	IPI00021167	Interferon-inducible double stranded RNA-dependent protein kinase activator A;Protein kinase, interferon-inducible double stranded RNA-dependent activator;Protein activator of the interferon-induced protein kinase;PKR-associated protein X;PKR-associating protein X;cDNA FLJ60590, highly similar to Interferon-inducible double strandedRNA-dependent protein kinase activator A	0.0041865			0.34608						0.65846
AAEACARPHGPPPDLAAR	1855.91	IPI00477962	UDP-N-acetylhexosamine pyrophosphorylase-like protein 1;cDNA FLJ38074 fis, clone CTONG2015804, highly similar to Homo sapiens UDP-N-acteylglucosamine pyrophosphorylase 1-like 1 (UAP1L1), mRNA;UAP1L1 protein	1.2422e-11	0.75238			0.18076	0.22157
AAEADGPLKR	1026.55	IPI00798419	cDNA FLJ57749, highly similar to Mannose-P-dolichol utilization defect 1 protein;Mannose-P-dolichol utilization defect 1, isoform CRA_a;cDNA FLJ31361 fis, clone MESAN2008460, highly similar to Homo sapiens SL15 protein mRNA;HBeAg-binding protein 2 binding protein A;cDNA FLJ57743, highly similar to Mannose-P-dolichol utilization defect 1 protein;Mannose-P-dolichol utilization defect 1, isoform CRA…	0.012569			0.90699						1.0862
AAEAEVELSARR	1300.67	IPI00217920	Aldehyde dehydrogenase family 16 member A1;cDNA FLJ51525, highly similar to Homo sapiens aldehyde dehydrogenase 16 family, member A1 (ALDH16A1), mRNA;cDNA FLJ51526, highly similar to Homo sapiens aldehyde dehydrogenase 16 family, member A1 (ALDH16A1), mRNA;cDNA FLJ60673, highly similar to Homo sapiens aldehyde dehydrogenase 16 family, member A1 (ALDH16A1), mRNA	0.079713		1.6499			0.5943
AAEAGGAEEQYGFLTTPTK	1939.92	IPI00008868	Microtubule-associated protein 1B;MAP1 light chain LC1;Microtubule-associated protein 1B, isoform CRA_a;MAP1B protein;Putative uncharacterized protein DKFZp686F1345	1.6865e-50		0.13912
AAEALAAEAVASR	1228.64	IPI00328082	Probable threonyl-tRNA synthetase 2, cytoplasmic;Threonine--tRNA ligase;Threonyl-tRNA synthetase-like protein 2;TARSL2 protein	8.0677e-05
AAEATNDYETLVKR	1579.78	IPI00552569	DNA excision repair protein ERCC-6-like;ATP-dependent helicase ERCC6-like;PLK1-interacting checkpoint helicase;Tumor antigen BJ-HCC-15;FLJ20105 protein, isoform CRA_a;Putative uncharacterized protein ERCC6L	1			0.81366
AAEAVAAAVGTGATTAAVMAAAGIAAIGPAK	2623.4	IPI00008868	Microtubule-associated protein 1B;MAP1 light chain LC1;Microtubule-associated protein 1B, isoform CRA_a;MAP1B protein;Putative uncharacterized protein DKFZp686F1345	7.2164e-38	0.011178	0.06739
AAECNIVVTQPR	1356.68	IPI00844578	ATP-dependent RNA helicase A;Nuclear DNA helicase II;DEAH box protein 9;DEAH (Asp-Glu-Ala-His) box polypeptide 9;DEAH (Asp-Glu-Ala-His) box polypeptide 9, isoform CRA_b;cDNA FLJ39263 fis, clone OCBBF2009571, highly similar to ATP-dependent RNA helicase A (EC 3.6.1.-);DHX9 protein;Leukophysin (ATP-dependent RNA helicase A)	8.696e-08	1.347		1.2356	0.8056	0.35164	0.99258	1.4565		1.9637
AAEDDEDDDVDTK	1436.54	IPI00827535	Prothymosin alpha;Thymosin alpha-1;Prothymosin alpha protein;Prothymosin, alpha;Prothymosin, alpha (Gene sequence 28) variant;Putative uncharacterized protein PTMAP7;cDNA, FLJ94794, highly similar to Homo sapiens prothymosin, alpha (gene sequence 28) (PTMA), mRNA;PTMA protein;Putative uncharacterized protein PTMA;Novel protein similar to prothymosin, alpha (PTMA);Putative uncharacterized protein	0.00049402			0.95984			1.4494
AAEDDEDDDVDTKK	1564.64	IPI00827535	Prothymosin alpha;Thymosin alpha-1;Prothymosin alpha protein;Prothymosin, alpha;Prothymosin, alpha (Gene sequence 28) variant;Putative uncharacterized protein PTMAP7;cDNA, FLJ94794, highly similar to Homo sapiens prothymosin, alpha (gene sequence 28) (PTMA), mRNA;PTMA protein;Putative uncharacterized protein PTMA;Novel protein similar to prothymosin, alpha (PTMA);Putative uncharacterized protein	0.0082927			0.8922		0.32611	1.105
AAEDEEVPAFFK	1351.63	IPI00883655	Dihydropyrimidinase-like 2 long form	1.0254e-06	0.16985		0.035346						0.17872
AAEDLFVNIR	1146.6	IPI00409684	Nck-associated protein 1;p125Nap1;Membrane-associated protein HEM-2;cDNA FLJ11291 fis, clone PLACE1009659, highly similar to Nck-associated protein 1	8.5676e-10	0.34971								0.59303
AAEDYGVIK	964.487	IPI00216138	Transgelin;Smooth muscle protein 22-alpha;WS3-10;22 kDa actin-binding protein;Transgelin variant;Putative uncharacterized protein DKFZp686P11128;TAGLN protein;Transgelin variant 2;Transgelin, isoform CRA_b;cDNA, FLJ94704, highly similar to Homo sapiens transgelin (TAGLN), mRNA	2.4899e-07		0.086245
AAEEAASTLASSIHPEQCIK	2112.02	IPI00396279	CLIP-associating protein 1;Cytoplasmic linker-associated protein 1;Multiple asters homolog 1;cDNA FLJ53242, highly similar to CLIP-associating protein 1;CLASP1 protein;MAST1;cDNA FLJ55778, highly similar to CLIP-associating protein 1;cDNA FLJ55338, highly similar to CLIP-associating protein 1;cDNA FLJ55790, highly similar to CLIP-associating protein 1;cDNA FLJ61355, highly similar to CLIP-associa…	4.9259e-08		1.3128
AAEEAEEARVQAER	1557.74	IPI00014898	Plectin-1;Hemidesmosomal protein 1;Similar to plectin 1, intermediate filament binding protein, 500kD;HCG1994702;Plectin isoform 1b	0.0082927		0.96704
AAEEAFVNDIDESSPGTEWER	2351.02	IPI00014587	Clathrin light chain A;cDNA FLJ60566, highly similar to Clathrin light chain A;cDNA FLJ77116, highly similar to Homo sapiens clathrin, light polypeptide (Lca) (CLTA), transcript variant nonbrain, mRNA;Clathrin, light polypeptide (Lca), isoform CRA_c	3.4372e-82	1.4708	1.0413				0.45855	1.1652	1.1599
AAEEEDEADPKR	1358.6	IPI00550020	Parathymosin;PTMS protein	0.0092317			0.57265						0.6035
AAEEIGIK	829.455	IPI00218342	C-1-tetrahydrofolate synthase, cytoplasmic;Methylenetetrahydrofolate dehydrogenase;Methenyltetrahydrofolate cyclohydrolase;Formyltetrahydrofolate synthetase;Methylenetetrahydrofolate dehydrogenase (NADP+ dependent) 1, methenyltetrahydrofolate cyclohydrolase, formyltetrahydrofolate synthetase, isoform CRA_a;cDNA, FLJ92681, Homo sapiens methylenetetrahydrofolate dehydrogenase (NADP+dependent), meth…	0.020806	1.1355	1.9541
AAEEPQQQK	1027.49	IPI00000581	cDNA FLJ56307, highly similar to Ubiquitin thioesterase protein OTUB1 (EC 3.4.-.-);Putative uncharacterized protein DKFZp564E242;Ubiquitin thioesterase OTUB1;Otubain-1;OTU domain-containing ubiquitin aldehyde-binding protein 1;Ubiquitin-specific-processing protease OTUB1;Deubiquitinating enzyme OTUB1	0.011466		2.4527	1.3309	1.3639
AAEEPSKVEEK	1215.6	IPI00219301	Myristoylated alanine-rich C-kinase substrate;Protein kinase C substrate, 80 kDa protein, light chain;MARCKS protein	0.044919		0.10894							0.094149
AAEESASQIQSSAQR	1561.73	IPI00299404	Laminin subunit beta-3;Laminin 5 beta 3;Laminin B1k chain;Kalinin B1 chain	9.9966e-39									1.1307
AAEGVSAADMAK	1119.52	IPI00304187	RNA-binding protein 28;RNA-binding motif protein 28;cDNA FLJ51865, highly similar to RNA-binding protein 28;cDNA FLJ50221, highly similar to RNA-binding protein 28	8.1906e-14			0.27282						0.26029
AAEGWSAPILTLAR	1454.79	IPI00744637	RUN and FYVE domain-containing protein 1;FYVE-finger protein EIP1;Zinc finger FYVE domain-containing protein 12;La-binding protein 1;Rab4-interacting protein;cDNA FLJ78384, highly similar to Homo sapiens RUN and FYVE domain containing 1 (RUFY1), mRNA;Putative uncharacterized protein RUFY1	6.159e-11	1.4988	1.1506		1.5239	1.4658		1.6918	1.4636	1.335
AAEHEVPLQER	1277.64	IPI00023330	LisH domain and HEAT repeat-containing protein KIAA1468;cDNA, FLJ96449	0.044919			0.39783			0.67838			0.83439
AAEIASSDSANVSSR	1463.69	IPI00031388	Phosphatidylinositol-4,5-bisphosphate 3-kinase catalytic subunit beta isoform;PI3-kinase p110 subunit beta;PtdIns-3-kinase p110;PI3Kbeta;cDNA FLJ57102, highly similar to Phosphatidylinositol-4,5-bisphosphate 3-kinase catalytic subunit beta isoform (EC 2.7.1.153);cDNA FLJ51708, highly similar to Phosphatidylinositol-4,5-bisphosphate 3-kinase catalytic subunit beta isoform (EC 2.7.1.153);Putative u…	3.0774e-24		1.0265
AAEIGYEDPINPTYEATNAMYHR	2625.18	IPI00383798	Proline dehydrogenase, mitochondrial;Proline oxidase;Proline oxidase 2;p53-induced gene 6 protein;Putative uncharacterized protein PRODH	2.0574e-19						0.034942
AAEIHSR	782.404	IPI00024283	WD repeat and FYVE domain-containing protein 1;WD40- and FYVE domain-containing protein 1;Phosphoinositide-binding protein 1;FENS-1;Zinc finger FYVE domain-containing protein 17;Putative uncharacterized protein WDFY1;WD repeat and FYVE domain containing 1, isoform CRA_a;cDNA FLJ13353 fis, clone OVARC1002182, weakly similar to BETA-TRCP (BETA-TRANSDUCIN REPEAT-CONTAINING PROTEIN)	0.011524									0.24482
AAEILAR	742.434	IPI00646182	cDNA FLJ55427, highly similar to Sodium/potassium-transporting ATPase alpha-1 chain (EC 3.6.3.9);cDNA FLJ60077, highly similar to Sodium/potassium-transporting ATPase alpha-1 chain (EC 3.6.3.9);Sodium/potassium-transporting ATPase subunit alpha-1;Na(+)/K(+) ATPase alpha-1 subunit;cDNA FLJ53830, highly similar to Sodium/potassium-transporting ATPase alpha-1 chain (EC 3.6.3.9);cDNA FLJ52430, highly…	0.14153		1.2812	0.63083	0.69445		0.9688
AAEISAMLK	932.5	IPI00293331	Ribonucleases P/MRP protein subunit POP1;cDNA FLJ78653, highly similar to Homo sapiens processing of 1, ribonuclease P/MRP subunit (POP1), mRNA;Processing of 1, ribonuclease P/MRP subunit (S. cerevisiae)	0.10105			1.5887
AAEIYGVTHTR	1216.62	IPI00163084	Pre-mRNA-splicing factor SYF1;XPA-binding protein 2;Protein HCNP;Putative uncharacterized protein DKFZp762C1015;Crn-related protein kim1	2.1196e-14			1.056			1.2355	0.70285	0.8582	2.9862
AAELEPDQLLAWQGLANLYEK	2371.21	IPI00005634	Tetratricopeptide repeat protein 37	4.0961e-39						0.48099
AAELFHQLSQALEVLTDAAAR	2253.18	IPI00018798	DnaJ homolog subfamily C member 17	0.0045393		1.1625				0.98637
AAELIANSLATAGDGLIELR	1997.08	IPI00017334	Prohibitin;cDNA FLJ78511, highly similar to Homo sapiens prohibitin (PHB), mRNA;Prohibitin, isoform CRA_a;cDNA, FLJ93035, Homo sapiens prohibitin (PHB), mRNA;PHB protein	2.2576e-134	2.819		1.8272		0.10919	0.55166	0.89645		1.4841
AAELIANSLATAGDGLIELRK	2125.17	IPI00017334	Prohibitin;cDNA FLJ78511, highly similar to Homo sapiens prohibitin (PHB), mRNA;Prohibitin, isoform CRA_a;cDNA, FLJ93035, Homo sapiens prohibitin (PHB), mRNA;PHB protein	1.4216e-13	1.6785	1.2013			0.23498		0.98683
AAELLMSCFR	1196.57	IPI00395420	PCI domain-containing protein 2;CSN12-like protein;Putative uncharacterized protein PCID2;cDNA FLJ78373, highly similar to Homo sapiens PCI domain containing 2, mRNA	0.00029384	0.51079	1.2133	0.5965						1.6413
AAELVTQNCEAYEAHMR	1991.88	IPI00101652	Selenocysteine lyase;cDNA FLJ55776, highly similar to Homo sapiens selenocysteine lyase (SCLY), mRNA;Selenocysteine lyase, isoform CRA_a;cDNA FLJ54796, highly similar to Homo sapiens selenocysteine lyase (SCLY), mRNA;cDNA FLJ52960, highly similar to Homo sapiens selenocysteine lyase (SCLY), mRNA	0.015442	1.6128				0.6144
AAELWGEQAEAR	1329.63	IPI00413895	Golgin subfamily A member 2;Cis-Golgi matrix protein GM130;Gm130 autoantigen;Golgin-95;Putative uncharacterized protein DKFZp686K0319;Golgi matrix protein GM130	6.9666e-19						0.58759
AAEMEHLLER	1197.58	IPI00166996	E3 ubiquitin-protein ligase synoviolin;Synovial apoptosis inhibitor 1;cDNA FLJ44964 fis, clone BRAWH2016209, highly similar to Homo sapiens synovial apoptosis inhibitor 1, synoviolin (SYVN1), transcript variant 2, mRNA	0.0041865	1.1239	2.341	1.58		0.55903	0.62695	1.638	2.1484	1.2102
AAEMLSQLDLFSR	1479.74	IPI00019148	Immunoglobulin-binding protein 1;CD79a-binding protein 1;B-cell signal transduction molecule alpha 4;Renal carcinoma antigen NY-REN-16	0.0084508			0.41471
AAEMMASLLK	1063.54	IPI00012837	Kinesin-1 heavy chain;Ubiquitous kinesin heavy chain;Conventional kinesin heavy chain;cDNA FLJ76989, highly similar to Homo sapiens kinesin family member 5B (KIF5B), mRNA;KIF5B protein	0.0041865	0.42224	0.62828	0.3388	0.48369	0.87046	0.59746	0.74425	0.52601	0.59709
AAEPLLTLER	1111.62	IPI00301618	Serologically defined colon cancer antigen 1;Antigen NY-CO-1;SDCCAG1 protein;cDNA FLJ36464 fis, clone THYMU2015161, highly similar to Serologically defined colon cancer antigen 1;cDNA FLJ55430, highly similar to Serologically defined colon cancer antigen 1;cDNA FLJ60527, highly similar to Serologically defined colon cancer antigen 1;cDNA FLJ61574, highly similar to Serologically defined colon can…	0.00029384			1.1911				1.0268		0.65001
AAEPLTELEESIETVVTTFFTFAR	2700.35	IPI00016179	Protein S100-A13;S100 calcium-binding protein A13	1							0.81854
AAEPQEQEFGK	1232.57	IPI00855787	Tankyrase 1 binding protein 1, 182kDa;Tankyrase 1 binding protein 1, 182kDa, isoform CRA_a;cDNA FLJ45975 fis, clone PLACE7018479, highly similar to 182 kDa tankyrase 1-binding protein;182 kDa tankyrase-1-binding protein	0.0047897		1.1102							0.20224
AAEPVEDNCINFVAMK	1806.83	IPI00290198	Interleukin-18;Interferon-gamma-inducing factor;Interleukin-1 gamma;Iboctadekin;DELTA3PRO-IL-18;Interleukin 18 (Interferon-gamma-inducing factor), isoform CRA_a;Interleukin 18	3.6132e-42		0.022122
AAEPVTFHVPWK	1380.72	IPI00017504	Uncharacterized protein C9orf40	0.0092317	1.2003			2.3033			1.2289		2.4512
AAEQYTPK	906.445	IPI00026781	Fatty acid synthase;[Acyl-carrier-protein] S-acetyltransferase;[Acyl-carrier-protein] S-malonyltransferase;3-oxoacyl-[acyl-carrier-protein] synthase;3-oxoacyl-[acyl-carrier-protein] reductase;3-hydroxypalmitoyl-[acyl-carrier-protein] dehydratase;Enoyl-[acyl-carrier-protein] reductase;Oleoyl-[acyl-carrier-protein] hydrolase;FASN protein	0.020806			2.8196			0.51476			0.73208
AAESLADPTEYENLFPGLK	2064.01	IPI00220219	Coatomer subunit beta';Beta'-coat protein;p102;cDNA FLJ56271, highly similar to Coatomer subunit beta;Coatomer protein complex, subunit beta 2 (Beta prime), isoform CRA_b	7.6146e-64		2.518	1.3595		0.76783	0.75167	0.71823	0.72845
AAESLTAIPEPASPQLLETPIHASQIQK	2939.56	IPI00552897	Mediator of DNA damage checkpoint protein 1;Nuclear factor with BRCT domains 1;cDNA FLJ51571, moderately similar to Mediator of DNA damage checkpoint protein 1;Mediator of DNA damage checkpoint 1	0.017499			0.27481
AAESPDQKDTEGGPKEEESPV	2198.98	IPI00024650	Monocarboxylate transporter 1;Solute carrier family 16 member 1;cDNA, FLJ92862, highly similar to Homo sapiens solute carrier family 16 (monocarboxylic acid transporters), member 1 (SLC16A1), mRNA;Solute carrier family 16, member 1 (Monocarboxylic acid transporter 1);Monocarboxylate transporter isoform 1;Solute carrier family 16 (Monocarboxylic acid transporters), member 1, isoform CRA_b	0.00030409			0.666						0.7092
AAESVSKPDVSEEAPGPSK	1883.91	IPI00218962	Chromosome 20 open reading frame 43;cDNA FLJ52798;UPF0549 protein C20orf43;Putative uncharacterized protein C20orf43;cDNA, FLJ95387	8.0291e-10	2.4344	1.6406			1.4566
AAETIIDTK	960.513	IPI00550638	DNA-directed RNA polymerase I subunit RPA49;DNA-directed RNA polymerase I subunit E;RNA polymerase I-associated factor 1;RNA polymerase I-associated factor 53;cDNA FLJ60956, highly similar to DNA-directed RNA polymerase I-associated factor 53 kDa subunit (EC 2.7.7.6);cDNA FLJ54770, highly similar to DNA-directed RNA polymerase I-associated factor 53 kDa subunit (EC 2.7.7.6)	0.57928			0.98802						2.0091
AAETQTLNFGPEWLR	1731.86	IPI00647635	PERQ amino acid-rich with GYF domain-containing protein 2;GRB10-interacting GYF protein 2;Trinucleotide repeat-containing gene 15 protein;GIGYF2 protein;cDNA FLJ61363, highly similar to Homo sapiens trinucleotide repeat containing 15 (TNRC15), mRNA;GRB10 interacting GYF protein 2;Trinucleotide repeat containing 15, isoform CRA_a;cDNA FLJ57070, highly similar to Homo sapiens trinucleotide repeat c…	2.1501e-16						1.6166
AAEVLNK	743.418	IPI00171903	Heterogeneous nuclear ribonucleoprotein M;Heterogeneous nuclear ribonucleoprotein M isoform a variant;ORF protein;cDNA FLJ60435, highly similar to Heterogeneous nuclear ribonucleoprotein M;HNRPM protein;Putative uncharacterized protein DKFZp547H118	0.0055377									1.1157
AAEVLPSAR	912.503	IPI00550638	DNA-directed RNA polymerase I subunit RPA49;DNA-directed RNA polymerase I subunit E;RNA polymerase I-associated factor 1;RNA polymerase I-associated factor 53;cDNA FLJ60956, highly similar to DNA-directed RNA polymerase I-associated factor 53 kDa subunit (EC 2.7.7.6);cDNA FLJ54187, highly similar to Homo sapiens polymerase (RNA) I associated factor 1 (PRAF1), mRNA	1		0.66652	0.45147						1.3043
AAEWQLDQPSWSGR	1629.75	IPI00018188	Adaptin ear-binding coat-associated protein 2;NECAP endocytosis-associated protein 2;Putative uncharacterized protein;cDNA FLJ53612, highly similar to Adaptin ear-binding coat-associated protein 2;cDNA FLJ52763, highly similar to Adaptin ear-binding coat-associated protein 2	2.7189e-12								0.43642
AAFALGGLGSGFASNREELSALVAPAFAHTSQVLVDK	3700.92	IPI00301263	CAD protein;Glutamine-dependent carbamoyl-phosphate synthase;Aspartate carbamoyltransferase;Dihydroorotase;Putative uncharacterized protein CAD	2.4853e-18							1.9945	1.9546
AAFDDAIAELDTLSEESYK	2086.96	IPI00000816	14-3-3 protein epsilon;cDNA, FLJ79100, highly similar to 14-3-3 protein epsilon (14-3-3E);14-3-3 protein epsilon isoform transcript variant 1;cDNA FLJ51851, highly similar to 14-3-3 protein epsilon (14-3-3E);cDNA, FLJ79084, highly similar to 14-3-3 protein epsilon (14-3-3E)	1.2032e-141	0.83759	0.71856	0.71675		2.472	1.9503
AAFGEEVDAVDTGISR	1635.77	IPI00010882	DNA fragmentation factor subunit alpha;DNA fragmentation factor 45 kDa subunit;Inhibitor of CAD;DNAation factor, 45kDa, alpha polypeptide isoform 1 variant;DNAation factor, 45kDa, alpha polypeptide;DNAation factor, 45kDa, alpha polypeptide, isoform CRA_c;cDNA, FLJ93833, Homo sapiens DNAation factor, 45kDa, alpha polypeptide(DFFA), mRNA;DNAation factor, 45kDa, alpha polypeptide, isoform CRA_b	5.1655e-27	1.2679	0.93744			3.4824			0.83195
AAFGILSYEHRPLK	1600.87	IPI00004068	Mediator of RNA polymerase II transcription subunit 12;Mediator complex subunit 12;Thyroid hormone receptor-associated protein complex 230 kDa component;Activator-recruited cofactor 240 kDa component;CAG repeat protein 45;OPA-containing protein;Trinucleotide repeat-containing gene 11 protein;cDNA FLJ60974, highly similar to Mediator of RNA polymerase II transcription subunit 12;TNRC11 protein;Med…	0.0064266	0.77767	1.3359		1.2071	0.28712			4.4133
AAFGISDSYVDGSSFDPQRR	2174	IPI00782992	Serine/arginine repetitive matrix protein 2;Serine/arginine-rich splicing factor-related nuclear matrix protein of 300 kDa;Splicing coactivator subunit SRm300;300 kDa nuclear matrix antigen;SRRM2 protein;KIAA0324;RNA binding protein	0.00093123						1.1826
AAFGLSEAGFNTACVTK	1742.83	IPI00217143	SDHA protein;Succinate dehydrogenase [ubiquinone] flavoprotein subunit, mitochondrial;Flavoprotein subunit of complex II;cDNA FLJ76840, highly similar to Homo sapiens succinate dehydrogenase complex, subunit A, flavoprotein (Fp) (SDHA), mRNA;Succinate dehydrogenase complex, subunit A, flavoprotein (Fp), isoform CRA_b;cDNA FLJ37560 fis, clone BRCOC2000333, highly similar to Succinate dehydrogenase…	1.0094e-115	0.74192	0.98098	1.1904	0.50274	0.37626	0.53478	0.87383	0.51888	0.90632
AAFLGCLTDVR	1221.62	IPI00001710	Protein fat-free homolog;Another new gene 2 protein	0.00012968			1.0026						1.0449
AAFLNFFR	984.518	IPI00394788	Probable alanyl-tRNA synthetase, mitochondrial;Alanine--tRNA ligase;Alanyl-tRNA synthetase-like;AARS2 protein	0.020806		1.1081	0.58148			0.41954	2.0748	1.5484	0.74829
AAFNSGK	693.345	IPI00797221	Glyceraldehyde 3-phosphate dehydrogenase	1		1.6881		0.21688
AAFNSGKVDIVAINDPFIDLNYMVYMFQYDSTHGK	3982.89	IPI00797221	Glyceraldehyde 3-phosphate dehydrogenase	1.0897e-13		1.4975
AAFPQYQPVVMLEK	1619.84	IPI00170706	Transmembrane protein 2;Transmembrane protein 2, isoform CRA_b;TMEM2 protein;cDNA FLJ55828, highly similar to Homo sapiens transmembrane protein 2 (TMEM2), mRNA	1.247e-25	0.27883
AAFQLGSPWR	1131.58	IPI00006663	Aldehyde dehydrogenase, mitochondrial;ALDH class 2;ALDHI;ALDH-E2;Mitochondrial aldehyde dehydrogenase 2 variant	0.0020405						0.20305
AAFQSLLDAQADEAVLDHPDLK	2366.18	IPI00015773	COMM domain-containing protein 3;Protein Bup;Protein PIL;COMM domain containing 3;HCG2017627, isoform CRA_b;cDNA FLJ45471 fis, clone BRSTN2016892, highly similar to COMM domain-containing protein 3	0.038834					1.5044
AAFQYGIK	896.476	IPI00883647	cDNA, FLJ92684, highly similar to Homo sapiens IK cytokine, down-regulator of HLA II (IK), mRNA;cDNA FLJ53904, highly similar to Protein Red;IK cytokine, down-regulator of HLA II;Clone TCCCIA00142 mRNA sequence;Chondrosarcoma-associated protein 2;Putative uncharacterized protein DKFZp564B112;Protein Red;Protein RER;IK factor;Cytokine IK	0.61652			0.37057	0.42875					0.47667
AAFTAFEEAQLPR	1449.73	IPI00060627	Coiled-coil domain-containing protein 124	4.8196e-06		1.0426	0.52467				1.8895
AAFTVSLDPGPLEQFPHSMEPQLR	2666.32	IPI00106491	mRNA turnover protein 4 homolog;cDNA FLJ14165 fis, clone NT2RP1000746, highly similar to mRNA turnover protein 4 homolog;Chromosome 1 open reading frame 33, isoform CRA_a	8.1781e-11		1.0409				0.83776	1.224		1.0603
AAFVAYALAFPR	1295.7	IPI00465085	Nicotinate phosphoribosyltransferase;Nicotinate phosphoribosyltransferase domain-containing protein 1;FHA-HIT-interacting protein;PP3856	5.4516e-09	0.022353	0.0067731	0.020402			0.13748			0.1837
AAFVLPEFAR	1119.61	IPI00292020	Spermidine synthase;Putrescine aminopropyltransferase;Spermidine synthase, isoform CRA_a	0.0020405	3.38	2.7716	3.1887	2.0083	2.1334	1.6117	1.2745	1.3957	0.92117
AAFVSEQQQK	1134.57	IPI00290043	Integrin alpha-3;Galactoprotein B3;VLA-3 alpha chain;FRP-2;CD49 antigen-like family member C;Integrin alpha-3 heavy chain;Integrin alpha-3 light chain;Integrin, alpha 3 (Antigen CD49C, alpha 3 subunit of VLA-3 receptor);ITGA3 protein;cDNA FLJ59664, highly similar to Integrin alpha-3;cDNA FLJ60385, highly similar to Integrin alpha-3;Integrin alpha 3 isoform b, variant	0.0041865									0.18617
AAFYHQPWAQEAVGR	1729.83	IPI00848321	SMARCD2 protein;cDNA FLJ59246, highly similar to Rattus norvegicus SWI/SNF related, matrix associated, actin dependent regulator of chromatin, subfamily d, member 2 (Smarcd2), mRNA;SWI/SNF related, matrix associated, actin dependent regulator of chromatin, subfamily d, member 2, isoform CRA_b;Putative uncharacterized protein SMARCD2;cDNA FLJ53269, highly similar to SWI/SNF-related matrix-associat…	0.0004557	0.8199		1.0501		0.77299	0.96904			2.6399
AAGAAEAAVAAVEEVGSAGQFEELLR	2515.26	IPI00008552	Glutaredoxin-3;Thioredoxin-like protein 2;PKC-interacting cousin of thioredoxin;PKC-theta-interacting protein	9.1373e-248	2.5274	2.0457	2.4769				0.55647	0.68398
AAGAEPDSILKPELLSAIEK	2051.11	IPI00019276	UBX domain-containing protein 6;UBX domain-containing protein 1	0.005466									0.20667
AAGAGNEAAALFLATNGAHVNHR	2232.11	IPI00159899	Ankyrin repeat and FYVE domain-containing protein 1;Ankyrin repeats hooked to a zinc finger motif;cDNA FLJ32485 fis, clone SKNMC2001596, highly similar to Ankyrin repeat and FYVE domain-containing protein 1;Putative uncharacterized protein DKFZp686M19106	1.5693e-19	0.54274	0.403					0.073627	0.11832
AAGALLNGPPQFSTAPEIK	1881	IPI00005015	CCR4-NOT transcription complex subunit 3;CCR4-associated factor 3;Leukocyte receptor cluster member 2;cDNA FLJ61662, highly similar to CCR4-NOT transcription complex subunit 3;FLJ00420 protein	1.9137e-38	0.74573	0.83041		1.1313	1.2907		1.1642	0.89326	0.98049
AAGAPGASDADGLKPR	1452.73	IPI00294840	Absent in melanoma 1 protein;Beta/gamma crystallin domain-containing protein 1;cDNA FLJ32143 fis, clone PLACE5000080, highly similar to Absent in melanoma 1 protein;cDNA FLJ43147 fis, clone CTONG3008639, highly similar to Absent in melanoma 1 protein;cDNA, FLJ79186, highly similar to Absent in melanoma 1 protein	0.032255			1.3872						0.18782
AAGARPLTSPESLSR	1511.81	IPI00892541	HLA-B associated transcript 3;Large proline-rich protein BAT3;HLA-B-associated transcript 3;Protein G3;HLA-B associated transcript 3, isoform CRA_b;HLA-B associated transcript 3, isoform CRA_a;cDNA FLJ61584, highly similar to Large proline-rich protein BAT3	0.0067724						0.47022
AAGASDVVLYK	1092.58	IPI00300074	Phenylalanyl-tRNA synthetase beta chain;Phenylalanine--tRNA ligase beta chain;cDNA FLJ75460, highly similar to Homo sapiens phenylalanine-tRNA synthetase-like, beta subunit, mRNA;cDNA FLJ57266, highly similar to Phenylalanyl-tRNA synthetase beta chain (EC 6.1.1.20);Phenylalanine-tRNA synthetase-like, beta subunit, isoform CRA_c;cDNA, FLJ79396, highly similar to Phenylalanyl-tRNA synthetase beta c…	5.4093e-10	1.2719	1.3811	1.1499	1.3485		0.96098	1.0943	0.9351	0.91385
AAGCDFTNVVK	1180.55	IPI00005038	Ribonuclease UK114;14.5 kDa translational inhibitor protein;p14.5;UK114 antigen homolog;Heat-responsive protein 12;UK114 protein;Heat-responsive protein 12, isoform CRA_a	0.00012968			1.6038		0.9245	0.55434	0.65292		1.433
AAGCNIPVASVAAGFPAGQTHLK	2236.14	IPI00219677	Putative deoxyribose-phosphate aldolase;Phosphodeoxyriboaldolase;2-deoxyribose-5-phosphate aldolase homolog;DERA protein;cDNA FLJ57519, highly similar to deoxyribose-phosphate aldolase (EC 4.1.2.4) (Phosphodeoxyriboaldolase) (Deoxyriboaldolase)(DERA)	5.1982e-21		1.0984					1.2815
AAGDTTVIENSDVSPETESSEK	2265.01	IPI00328753	Kinectin;Kinesin receptor;CG-1 antigen;Rhabdomyosarcoma antigen MU-RMS-40.19;KTN1 protein;cDNA FLJ61494, highly similar to Kinectin;cDNA FLJ31308 fis, clone LIVER1000139, highly similar to Kinectin;cDNA FLJ43510 fis, clone PERIC2003720, highly similar to Kinectin;cDNA FLJ55573, highly similar to Kinectin;Kinectin 1 (Kinesin receptor)	1.0214e-128	0.64475				1.4067
AAGDVDIGDAAYYFER	1731.77	IPI00297910	Tumor-associated calcium signal transducer 2;Pancreatic carcinoma marker protein GA733-1;Cell surface glycoprotein Trop-2	1.0667e-73	0.12283		0.26246		0.29481		1.2332	1.1851
AAGEGLLTLR	999.571	IPI00301250	Epidermal growth factor receptor kinase substrate 8-like protein 1;Epidermal growth factor receptor pathway substrate 8-related protein 1;EPS8-like protein 1;cDNA FLJ60287, highly similar to Epidermal growth factor receptor kinase substrate 8-like protein 1	0.051346				0.43059
AAGELGIAVCNIPSAAVEETADSTICHILNLYRR	3683.84	IPI00010136	C-terminal-binding protein 2;C-terminal binding protein 2;CTBP2 protein	0.098861							1.4865
AAGEVLEPANLLAEEK	1652.86	IPI00001568	V-type proton ATPase subunit D;Vacuolar proton pump subunit D;V-ATPase 28 kDa accessory protein;ATPase, H+ transporting, lysosomal 34kDa, V1 subunit D, isoform CRA_a;cDNA, FLJ96900, Homo sapiens ATPase, H+ transporting, lysosomal 34kDa, V1 subunit D(ATP6V1D), mRNA;ATPase, H+ transporting, lysosomal 34kDa, V1 subunit D;Vacuolar ATP synthase subunit D homolog	0.0024877		0.019671
AAGFKDPLLASGTDGVGTK	1803.94	IPI00025273	Trifunctional purine biosynthetic protein adenosine-3;Phosphoribosylamine--glycine ligase;Glycinamide ribonucleotide synthetase;Phosphoribosylglycinamide synthetase;Phosphoribosylformylglycinamidine cyclo-ligase;Phosphoribosyl-aminoimidazole synthetase;AIR synthase;Phosphoribosylglycinamide formyltransferase;5'-phosphoribosylglycinamide transformylase;GAR transformylase;cDNA FLJ78616, highly simi…	0.0088686	0.74165	1.1023	0.68236	2.2657	2.9507	1.6509	1.7063	0.96416	1.0137
AAGFSSSTTSTSWEGNR	1744.77	IPI00217413	ATP-dependent RNA helicase DHX29;DEAH box protein 29;Nucleic acid helicase DDXx	0.0016932	2.1257	1.7917		1.2627	1.0616		1.0788
AAGGAVCEQPLGLECR	1686.78	IPI00918002	Mucin 5AC, oligomeric mucus/gel-forming;Mucin MUC5B;Mucin-5B;Mucin-5 subtype B, tracheobronchial;High molecular weight salivary mucin MG1;Sublingual gland mucin;Cervical mucin;cDNA FLJ59081, highly similar to Mucin-5B;MG1;Cervical mucin MUC5B	1.3222e-59						0.059278
AAGGDHGSPDSYR	1288.54	IPI00942092	Adenylosuccinate lyase;Adenylosuccinase;cDNA FLJ53891, highly similar to Adenylosuccinate lyase (EC 4.3.2.2);cDNA FLJ59367, highly similar to Adenylosuccinate lyase (EC 4.3.2.2);cDNA FLJ75223, highly similar to Homo sapiens adenylosuccinate lyase (ADSL);Adenylosuccinate lyase, isoform CRA_a;cDNA FLJ59852, highly similar to Adenylosuccinate lyase (EC 4.3.2.2)	2.509e-19		1.192		1.2048				1.0669	1.0428
AAGGDHGSPDSYRSPLASR	1899.88	IPI00942092	Adenylosuccinate lyase;Adenylosuccinase;cDNA FLJ53891, highly similar to Adenylosuccinate lyase (EC 4.3.2.2);cDNA FLJ59367, highly similar to Adenylosuccinate lyase (EC 4.3.2.2);cDNA FLJ75223, highly similar to Homo sapiens adenylosuccinate lyase (ADSL);Adenylosuccinate lyase, isoform CRA_a;cDNA FLJ59852, highly similar to Adenylosuccinate lyase (EC 4.3.2.2)	8.0291e-10	0.68715	1.8415		1.4076	2.031		1.7418	1.8893
AAGGFTHDELLKVWK	1670.88	IPI00550766	Ribosomal RNA processing protein 1 homolog A;RRP1-like protein;Novel nuclear protein 1;Nucleolar protein Nop52;Putative uncharacterized protein RRP1;Nucleolar protein NOP52 variant;RRP1 protein;NNP3;cDNA FLJ61500, highly similar to NNP-1 protein	0.576			1.5882
AAGGIELFVGGIGPDGHIAFNEPGSSLVSR	2923.48	IPI00009305	Glucosamine-6-phosphate isomerase 1;Glucosamine-6-phosphate deaminase 1;Oscillin;cDNA FLJ76269, highly similar to Homo sapiens glucosamine-6-phosphate deaminase 1 (GNPDA1), mRNA;cDNA FLJ12717 fis, clone NT2RP1001253, highly similar to Glucosamine-6-phosphate isomerase (EC 3.5.99.6)	0.00095555							1.0712
AAGHEPHLLAR	1170.63	IPI00063762	4-hydroxyphenylpyruvate dioxygenase-like protein;Glyoxalase domain-containing protein 1;Glyoxalase domain containing 1;cDNA, FLJ94307	0.001212		5.2826	5.9847			32.488			7.2845
AAGIDEQENWHEGK	1582.7	IPI00419237	Cytosol aminopeptidase;Leucine aminopeptidase;Leucyl aminopeptidase;Leucine aminopeptidase 3;Proline aminopeptidase;Prolyl aminopeptidase;Peptidase S;cDNA FLJ11993 fis, clone HEMBB1001429, highly similar to Cytosol aminopeptidase (EC 3.4.11.1);cDNA FLJ61331, highly similar to Cytosol aminopeptidase (EC 3.4.11.1)	0.135	1.073			1.0312			1.2599
AAGIDEQENWHEGKENIR	2094.97	IPI00419237	Cytosol aminopeptidase;Leucine aminopeptidase;Leucyl aminopeptidase;Leucine aminopeptidase 3;Proline aminopeptidase;Prolyl aminopeptidase;Peptidase S;cDNA FLJ11993 fis, clone HEMBB1001429, highly similar to Cytosol aminopeptidase (EC 3.4.11.1);cDNA FLJ61331, highly similar to Cytosol aminopeptidase (EC 3.4.11.1)	0.23206						0.80073			1.156
AAGIIHLGATSCYVGDNTDLIILR	2542.32	IPI00942092	Adenylosuccinate lyase;Adenylosuccinase;cDNA FLJ53891, highly similar to Adenylosuccinate lyase (EC 4.3.2.2);cDNA FLJ75223, highly similar to Homo sapiens adenylosuccinate lyase (ADSL);Adenylosuccinate lyase, isoform CRA_a	8.1781e-11	0.71832	1.1546
AAGLAFSDGDHRTEIRK	1842.93	CON_00727340		0.0059611	0.026478	0.0237					0.089849	0.14739
AAGLATMISTMRPDIDNMDEYVR	2569.2	IPI00026089	Splicing factor 3B subunit 1;Pre-mRNA-splicing factor SF3b 155 kDa subunit;Spliceosome-associated protein 155;SF3B1 protein;Putative uncharacterized protein DKFZp434M052	2.4147e-22			1.114				1.2945
AAGLGELGAALLQLVR	1550.91	IPI00792208	Steroid hormone receptor ERR1;Estrogen-related receptor, alpha;Estrogen receptor-like 1;Nuclear receptor subfamily 3 group B member 1;ESRRA protein;Estrogen-related receptor alpha;HCG2016877, isoform CRA_b;Similar to estrogen-related receptor alpha;Putative uncharacterized protein	1.8658e-05		1.6907
AAGLQAEIGQVK	1183.66	IPI00216719	ELKS/RAB6-interacting/CAST family member 1;RAB6-interacting protein 2;RAB6 interacting protein 2, isoform CRA_a	1.5141e-09								0.22712	0.17533
AAGLVSDLDADSGLTLSR	1759.9	IPI00604527	Threonyl-tRNA synthetase, mitochondrial;Threonine--tRNA ligase;Threonyl-tRNA synthetase-like 1;Threonyl-tRNA synthetase 2, mitochondrial (Putative);cDNA FLJ12528 fis, clone NT2RM4000155, moderately similar to THREONYL-TRNA SYNTHETASE, CYTOPLASMIC (EC 6.1.1.3);Threonyl-tRNA synthetase-like 1, isoform CRA_b;Threonyl-tRNA synthetase;Putative uncharacterized protein DKFZp667F1511	0.0056238	0.41624				0.43362
AAGMSSPGAQSHPEELPR	1820.85	IPI00336047	Myosin-IXb;Unconventional myosin-9b;MYO9B variant protein;Myosin;MYO9B protein	0.005267	0.48843	0.6921		1.2867					0.22285
AAGNTVIAK	843.481	IPI00171391	Aldehyde dehydrogenase family 8 member A1;Aldehyde dehydrogenase 12	0.57928				3.3932
AAGPGWAAYER	1147.54	IPI00328905	Ras GTPase-activating-like protein IQGAP3;IQ motif containing GTPase activating protein 3	0.00012968	0.36498
AAGPISER	799.419	IPI00017339	Splicing factor 3B subunit 4;Spliceosome-associated protein 49;SF3b50;Pre-mRNA-splicing factor SF3b 49 kDa subunit;cDNA FLJ39996 fis, clone STOMA2002166, highly similar to Splicing factor 3B subunit 4;Splicing factor 3b, subunit 4 variant	1.6029e-05	0.78748	0.54828	0.97878	1.9182		2.2689
AAGPLLTDECR	1201.58	IPI00155601	MACRO domain-containing protein 1;Protein LRP16	0.00012968		0.031722	2.8952			1.868			3.2271
AAGSGELGVTMK	1119.56	IPI00477536	Filamin-B;Beta-filamin;Actin-binding-like protein;Thyroid autoantigen;Truncated actin-binding protein;ABP-280 homolog;ABP-278;Filamin 3;Filamin homolog 1;Filamin B;Putative uncharacterized protein DKFZp686A1668;Filamin B variant 2	1.5141e-09	0.037217	0.26336	0.2174	0.548	0.26529	0.33194	0.067524	0.053459	0.054893
AAGSYGGMASPMGVYSGHPEQYSAGMGR	2775.18	IPI00019155	Forkhead box protein C2;Forkhead-related protein FKHL14;Transcription factor FKH-14;Mesenchyme fork head protein 1	8.4556e-43
AAGTAAALAFLSQESR	1562.81	IPI00026496	Nucleoplasmin-3	2.1052e-50	1.7704	1.6113				0.67589		1.2221	1.3323
AAGTDGSDFQHR	1260.55	IPI00329025	Protein jagunal homolog 1	0.079713			0.43864
AAGTDSFNGHPPQGCASTPVAR	2197	IPI00220045	DNA-directed RNA polymerase III subunit RPC5;DNA-directed RNA polymerase III 80 kDa polypeptide;cDNA FLJ59568, highly similar to DNA-directed RNA polymerases III 80 kDa polypeptide (EC 2.7.7.6);Polymerase (RNA) III (DNA directed) polypeptide E variant;cDNA FLJ59434, highly similar to DNA-directed RNA polymerases III 80 kDa polypeptide (EC 2.7.7.6);cDNA FLJ55674, highly similar to DNA-directed RNA…	5.1919e-17		2.6745		0.90844
AAGTLYTYPENWR	1540.73	IPI00937615	Elongation factor 1-gamma;eEF-1B gamma;Eukaryotic translation elongation factor 1 gamma;GIG35;EEF1G protein;Eukaryotic translation elongation factor 1 gamma, isoform CRA_c;cDNA FLJ59991, highly similar to Elongation factor 1-gamma;cDNA FLJ59973, highly similar to Elongation factor 1-gamma	3.6459e-34	1.3741	1.5671			2.7711	2.6924	1.7951	2.0249
AAGTSSYWEDLRK	1482.71	IPI00029447	Golgi SNAP receptor complex member 1;28 kDa Golgi SNARE protein;28 kDa cis-Golgi SNARE p28;cDNA FLJ77138, highly similar to Homo sapiens golgi SNAP receptor complex member 1 (GOSR1), transcript variant 1, mRNA;cDNA FLJ58038, highly similar to Golgi SNAP receptor complex member 1;GOSR1 protein	6.9831e-28			1.0278			0.27313	0.62442		0.6711
AAGVEAAAEVAATEIK	1499.78	IPI00171903	Heterogeneous nuclear ribonucleoprotein M;Heterogeneous nuclear ribonucleoprotein M isoform a variant;ORF protein;cDNA FLJ60435, highly similar to Heterogeneous nuclear ribonucleoprotein M;HNRPM protein;Putative uncharacterized protein DKFZp547H118	1.0667e-73	0.94788	0.9694	0.85432		0.94073		1.1801
AAGVLEGALGPHVVTNLYLYPIK	2394.33	IPI00304895	Molybdenum cofactor sulfurase;HMCS;MOS	1							1.0635
AAGVNVEPFWPGLFAK	1701.89	IPI00008527	60S acidic ribosomal protein P1;RPLP1 protein;Acidic ribosomal phosphoprotein P1	2.2979e-37	1.7068	1.4757	1.1501	1.5531	0.8707	1.2191	0.80017	1.2248	0.86603
AAGVVLEMIR	1057.6	IPI00009104	RuvB-like 2;48 kDa TATA box-binding protein-interacting protein;TIP49b;Repressing pontin 52;51 kDa erythrocyte cytosolic protein;TIP60-associated protein 54-beta;INO80 complex subunit J;cDNA FLJ14856 fis, clone PLACE1001054, highly similar to RuvB-like 2 (EC 3.6.1.-);RuvB-like 2 (E. coli), isoform CRA_d;cDNA FLJ32936 fis, clone TESTI2007533, highly similar to RuvB-like 2 (EC 3.6.1.-);RuvB-like 2 …	0.0020405	0.64783	0.62099	0.6958	1.838	2.2636	1.7047	1.1115	1.236	0.98781
AAGVVLEMIREGK	1371.75	IPI00009104	RuvB-like 2;48 kDa TATA box-binding protein-interacting protein;TIP49b;Repressing pontin 52;51 kDa erythrocyte cytosolic protein;TIP60-associated protein 54-beta;INO80 complex subunit J;cDNA FLJ14856 fis, clone PLACE1001054, highly similar to RuvB-like 2 (EC 3.6.1.-);RuvB-like 2 (E. coli), isoform CRA_d;cDNA FLJ32936 fis, clone TESTI2007533, highly similar to RuvB-like 2 (EC 3.6.1.-);RuvB-like 2 …	1							1.0826
AAGWSELSER	1104.52	IPI00874020	Pterin-4-alpha-carbinolamine dehydratase 2;4-alpha-hydroxy-tetrahydropterin dehydratase 2;DcoH-like protein DCoHm;Dimerization cofactor of hepatocyte nuclear factor 1 from muscle;HNF-1-alpha dimerization cofactor	0.012569			1.8336			0.94022			4.3835
AAGYDLYSAYDYTIPPMEK	2166.98	IPI00375015	Deoxyuridine 5'-triphosphate nucleotidohydrolase, mitochondrial;dUTP pyrophosphatase	2.5931e-10		0.79216			2.0576
AAHEALGQFCCALHK	1711.79	IPI00398009	Importin-4;Importin-4b;Ran-binding protein 4;cDNA FLJ32715 fis, clone TESTI2000784, highly similar to Importin-4;Importin 4 variant;Importin 4;Importin 4, isoform CRA_a;cDNA FLJ32140 fis, clone PLACE5000058, highly similar to Importin-4;cDNA FLJ32482 fis, clone SKNMC2001324, highly similar to Importin-4;cDNA FLJ36788 fis, clone ADRGL2004451, highly similar to Importin-4;cDNA FLJ37578 fis, clone B…	6.4616e-42	2.5912	2.6212		1.2867	1.6271	1.1212	3.3017	2.6141	3.7075
AAHEWDWFQR	1344.6	IPI00101942	Calmin;Calponin-like transmembrane domain protein;CLMN protein;Calmin (Calponin-like, transmembrane), isoform CRA_b;cDNA, FLJ95073, Homo sapiens calmin (calponin-like, transmembrane) (CLMN), mRNA;cDNA FLJ13766 fis, clone PLACE4000129, highly similar to Calmin;Calmin (Calponin-like, transmembrane)	1.0307e-05									0.4859
AAHGGSAASSALK	1126.57	IPI00742124	UBX domain-containing protein 7;cDNA FLJ61199, highly similar to UBX domain-containing protein 7	2.509e-19		1.6009	1.5452	2.722		1.8928	2.6356	2.229	2.2863
AAHIFFTDTCPEPLFSELGR	2307.1	IPI00943192	Syntaxin-binding protein 2;Unc-18 homolog 2;Unc-18B;Hunc18b2;STXBP2 protein;Syntaxin binding protein 2;Syntaxin binding protein 2, isoform CRA_b;cDNA FLJ54775, highly similar to Syntaxin-binding protein 2;Syntaxin binding protein 2 variant;cDNA FLJ53447, highly similar to Syntaxin-binding protein 2;Putative uncharacterized protein pp10122	3.1613e-08			0.57857				0.59983	0.70196	0.61305
AAHIFNEALVCHQIR	1777.9	IPI00414980	Myosin-Ib;Myosin I alpha;MMI-alpha;MYH-1c;MYO1B variant protein;Myosin IB, isoform CRA_a;cDNA FLJ90497 fis, clone NT2RP3003874, highly similar to Myosin Ib	8.1065e-77	0.87114	1.0346	1.0085	1.0826	1.5741	1.2266	0.21558	0.11946	0.18638
AAHIGGAGAGDK	1023.51	IPI00450235	Nuclease sensitive element binding protein-1	1					0.41619		1.4957
AAHLCAEAALR	1181.6	IPI00299000	Proliferation-associated protein 2G4;Cell cycle protein p38-2G4 homolog;ErbB3-binding protein 1;cDNA FLJ75526, highly similar to Homo sapiens proliferation-associated 2G4, 38kDa (PA2G4), mRNA;PA2G4 protein	8.5931e-21	1.3327	1.5674	1.408	1.6791	1.9195	1.5021	1.3337	1.2249	1.2029
AAHLSYGR	873.446	IPI00073179	Vacuolar protein sorting-associated protein 33A;cDNA, FLJ96613, highly similar to Homo sapiens vacuolar protein sorting 33A (yeast) (VPS33A), mRNA;cDNA: FLJ22395 fis, clone HRC07889	0.016114		1.2552	1.0921	0.576	0.45306	0.58734	0.97801	0.78116	0.73536
AAHRPVEWVQAVVSR	1703.92	IPI00299512	Neurofibromin;Neurofibromatosis-related protein NF-1;Neurofibromin truncated;cDNA FLJ76650, highly similar to Human NF1 N-isoform-exon11;NF1 N-isoform-exon11;Neurofibromin 1 (Neurofibromatosis, von Recklinghausen disease, Watson disease), isoform CRA_e;Putative uncharacterized protein DKFZp686J1293	0.0026593	0.57022	0.41673			0.1952
AAHSEGNTTAGLDMR	1529.69	IPI00297779	T-complex protein 1 subunit beta;CCT-beta;cDNA FLJ75037, highly similar to Homo sapiens chaperonin containing TCP1, subunit 2 (beta) (CCT2),mRNA;cDNA FLJ50480, highly similar to T-complex protein 1 subunit beta;cDNA FLJ50585, highly similar to T-complex protein 1 subunit beta;cDNA FLJ52359, highly similar to T-complex protein 1 subunit beta;cDNA, FLJ79296, highly similar to T-complex protein 1 su…	5.0621e-54	0.75445	0.84936	0.7005	1.0923	1.4828	1.2801		1.2329	1.3729
AAHSNEILIFSVQPK	1652.89	IPI00003793	Kelch domain-containing protein 2;Hepatocellular carcinoma-associated antigen 33;Host cell factor homolog LCP;Host cell factor-like protein 1;cDNA FLJ31736 fis, clone NT2RI2007054, highly similar to Kelch domain-containing protein 2;Kelch domain containing 2, isoform CRA_a	0.0023194			1.8332	0.94447	0.64745				2.8687
AAHSYNPKEFEWNLK	1832.88	IPI00843759	Putative uncharacterized protein YTHDF1;cDNA FLJ38476 fis, clone FEBRA2022504, highly similar to YTH domain protein 1;YTH domain family protein 1;Dermatomyositis associated with cancer putative autoantigen 1;cDNA FLJ58619, highly similar to YTH domain protein 1	0.576			1.0966			0.77916
AAHTEDINACTLTTSPR	1856.87	IPI00900312	RAF proto-oncogene serine/threonine-protein kinase;C-RAF;Raf-1;cDNA FLJ57286, highly similar to RAF proto-oncogene serine/threonine-protein kinase (EC 2.7.11.1);cDNA FLJ50355, highly similar to RAF proto-oncogene serine/threonine-protein kinase (EC 2.7.11.1)	0.0016932	0.76504	0.65055			0.89996		0.72627		0.99987
AAHVLMPHESTVEHTHVDINEMESPLATR	3250.55	IPI00029054	Cytosolic purine 5'-nucleotidase;5'-nucleotidase cytosolic II;cDNA FLJ75877, highly similar to Homo sapiens 5'-nucleotidase, cytosolic II (NT5C2), mRNA;cDNA FLJ53335, highly similar to Cytosolic purine 5'-nucleotidase (EC 3.1.3.5);cDNA FLJ45768 fis, clone NETRP2000961, highly similar to Cytosolic purine 5'-nucleotidase (EC 3.1.3.5)	4.8862e-23		0.65513					1.5869	1.7024
AAHVTLLTSLVEGEAVHLAR	2086.15	IPI00023260	Transcription factor AP-2 gamma;Activating enhancer-binding protein 2 gamma;Transcription factor ERF-1;cDNA, FLJ95025, highly similar to Homo sapiens transcription factor AP-2 gamma (activating enhancerbinding protein 2 gamma) (TFAP2C), mRNA;cDNA FLJ50899, highly similar to Transcription factor AP-2 gamma	0.0001119		0.89825				1.5867			13.491
AAIAFLHALWQDR	1510.8	IPI00477040	Nucleoporin NUP188 homolog;NUP188 protein	0.00066987								0.55446
AAIAQALAGEVSVVPPSR	1734.96	IPI00305833	WD40 repeat-containing protein SMU1;Smu-1 suppressor of mec-8 and unc-52 protein homolog;CDW3/SMU1;Smu-1 suppressor of mec-8 and unc-52 homolog (C. elegans), isoform CRA_a;Putative uncharacterized protein SMU1;cDNA FLJ54259, highly similar to Smu-1 suppressor of mec-8 and unc-52 protein homolog	4.5319e-05	0.61478		0.6749						1.7393
AAIDWFDGK	1021.49	IPI00294426	RNA-binding protein FUS;Oncogene FUS;Oncogene TLS;Translocated in liposarcoma protein;POMp75;75 kDa DNA-pairing protein;Fus-like protein;cDNA FLJ58049, highly similar to RNA-binding protein FUS;BBF2H7/FUS protein;Putative uncharacterized protein FUS;TATA-binding protein-associated factor 2N;RNA-binding protein 56;TAFII68;TAF(II)68;TAF15 RNA polymerase II, TATA box binding protein (TBP)-associated…	0.0012138	1.4818	1.0195	1.2105			1.361	1.0101		1.9456
AAIDWFDGKEFHGNIIK	1959.98	IPI00294426	TATA-binding protein-associated factor 2N;RNA-binding protein 56;TAFII68;TAF(II)68;TAF15 RNA polymerase II, TATA box binding protein (TBP)-associated factor, 68kDa;TAF15 RNA polymerase II, TATA box binding protein (TBP)-associated factor, 68kDa, isoform CRA_b;cDNA, FLJ94920, Homo sapiens TAF15 RNA polymerase II, TATA box binding protein(TBP)-associated factor, 68kDa (TAF15), transcript variant 1,…	0.0032877			0.45922			2.2121			0.93893
AAIDWFDGKEFSGNPIK	1893.93	IPI00260715	RNA-binding protein FUS;Oncogene FUS;Oncogene TLS;Translocated in liposarcoma protein;POMp75;75 kDa DNA-pairing protein;Fus-like protein;cDNA FLJ58049, highly similar to RNA-binding protein FUS;BBF2H7/FUS protein;Putative uncharacterized protein FUS	4.3964e-55			1.4748			0.61739			1.8366
AAIEAFNK	862.455	IPI00168388	Signal recognition particle 68 kDa protein;cDNA FLJ11140 fis, clone PLACE1006488, highly similar to Signal recognition particle 68 kDa protein;cDNA FLJ44270 fis, clone TLIVE2008229, highly similar to SIGNAL RECOGNITION PARTICLE 68 kDa PROTEIN;cDNA FLJ54176, highly similar to Signal recognition particle 68 kDa protein;Signal recognition particle 68kDa, isoform CRA_c;cDNA FLJ40643 fis, clone THYMU2…	0.020806				1.7226				1.1773	1.0067
AAIGLLAR	783.497	IPI00218693	Adenine phosphoribosyltransferase	0.10158						0.99402
AAIGVHLGCTSACVAVYK	1875.93	IPI00292499	Heat shock 70 kDa protein 14;Heat shock protein HSP60;HSP70-like protein 1;cDNA FLJ77376, highly similar to Homo sapiens heat shock 70kDa protein 14 (HSPA14), mRNA;Heat shock 70kDa protein 14 isoform 1 variant 1;Heat shock 70kDa protein 14 isoform 1 variant 2;Heat shock 70kDa protein 14, isoform CRA_a;cDNA FLJ59155, highly similar to Homo sapiens heat shock 70 kDa protein 14 (HSPA14), transcript …	8.9844e-126	1.0336	0.97947		0.75526
AAIHQILTENTPVSEQLSVPQR	2430.29	IPI00009982	Tudor and KH domain-containing protein;cDNA FLJ54003, highly similar to Tudor and KH domain-containing protein;cDNA FLJ61003, highly similar to Tudor and KH domain-containing protein;Tudor and KH domain containing;Tudor and KH domain containing, isoform CRA_c;Tudor and KH domain containing, isoform CRA_b;cDNA FLJ31840 fis, clone NT2RP7000109, highly similar to Tudor and KH domain-containing prote…	0.092391	0.74112	0.62107			0.33218
AAIISAEGDSK	1060.54	IPI00017334	Prohibitin;cDNA FLJ78511, highly similar to Homo sapiens prohibitin (PHB), mRNA;Prohibitin, isoform CRA_a;cDNA, FLJ93035, Homo sapiens prohibitin (PHB), mRNA;PHB protein;Prohibitin variant	0.00012968		0.9907	2.0262	0.4838	0.16966	0.51996	0.93034
AAILETAPK	912.528	IPI00856098	p180/ribosome receptor;Ribosome-binding protein 1;Ribosome receptor protein;180 kDa ribosome receptor homolog;ES/130-related protein;RRBP1 protein;Ribosome binding protein 1 homolog 180kDa (Dog);cDNA FLJ36146 fis, clone TESTI2025117, highly similar to Ribosome-binding protein 1	0.011466			0.48787	1.4725		0.93804	0.167		0.30166
AAILGDTIMVAK	1201.67	IPI00176469	Chaperone activity of bc1 complex-like, mitochondrial;aarF domain-containing protein kinase 3;CABC1 protein;Chaperone, ABC1 activity of bc1 complex homolog (S. pombe)	1.5141e-09	1.1127	2.0653		0.18157		0.083878
AAILGFTSPVWAVR	1486.83	IPI00894544	Thyroid adenoma-associated protein;Gene inducing thyroid adenomas protein;HCG16399, isoform CRA_c;Putative uncharacterized protein THADA;cDNA FLJ44876 fis, clone BRAMY2031516	1.8013e-06									1.2973
AAILPTSIFLTNK	1387.81	IPI00441473	Protein arginine N-methyltransferase 5;Histone-arginine N-methyltransferase PRMT5;Shk1 kinase-binding protein 1 homolog;SKB1Hs;Jak-binding protein 1;72 kDa ICln-binding protein;cDNA, FLJ96564, highly similar to Homo sapiens SKB1 homolog (S. pombe) (SKB1), mRNA;Protein arginine methyltransferase 5 isoform a (Protein arginine methyltransferase 5, isoform CRA_b);cDNA FLJ90770 fis, clone THYRO1000866…	1.002e-43		1.732	1.1368	1.3302		0.95644	1.6031	2.0081	1.1548
AAIPSSGSLVATHDYYR	1806.89	IPI00607900	Exocrine differentiation and proliferation factor	3.0897e-42	2.5496		8.9632	1.3702	0.32036				6.5702
AAIQSQLDGVR	1156.62	IPI00157734	Exocyst complex component 3;Exocyst complex component Sec6;cDNA, FLJ96859;Putative uncharacterized protein DKFZp762K123;Exocyst complex component 3, isoform CRA_a;FLJ00339 protein	0.0013428			0.68116						0.53316
AAISGENAGLVR	1156.62	CON_00686012	Inter-alpha-trypsin inhibitor heavy chain H1;Inter-alpha-trypsin inhibitor complex component III;Serum-derived hyaluronan-associated protein;Inter-alpha (Globulin) inhibitor H1, isoform CRA_a;cDNA FLJ77949, highly similar to H.sapiens inter-alpha-trypsin inhibitor heavy chain ITIH1;cDNA FLJ56954, highly similar to Inter-alpha-trypsin inhibitor heavy chain H1;cDNA FLJ56821, highly similar to Inter…	1.0254e-06		0.44563	0.45628						0.70678
AAISLVPEVPK	1122.66	IPI00465238	UPF0505 protein C16orf62;Esophageal cancer-associated protein;cDNA FLJ37759 fis, clone BRHIP2023888	0.00038844									0.28556
AAISSGIEDPVPTLHLTER	2005.05	IPI00005015	CCR4-NOT transcription complex subunit 3;CCR4-associated factor 3;Leukocyte receptor cluster member 2;cDNA FLJ61662, highly similar to CCR4-NOT transcription complex subunit 3;FLJ00420 protein	8.4795e-86	0.75934	0.77364	0.66393		0.92063	0.86453		1.1481	1.0901
AAIVEK	629.375	IPI00009901	Nuclear transport factor 2;Placental protein 15;Nuclear transport factor 2, isoform CRA_a;cDNA, FLJ92083, Homo sapiens nuclear transport factor 2 (NUTF2), mRNA;cDNA FLJ57908, moderately similar to Nuclear transport factor 2	0.44806							1.925
AAIWESQHEGPEGAR	1636.76	IPI00396634	Uncharacterized protein KIAA1671;KIAA1671 protein	0.0067724									0.58457
AAIYGGVEGGGTR	1206.6	IPI00296526	cDNA FLJ56394, highly similar to N-acetylglucosamine kinase (EC 2.7.1.59);N-acetylglucosamine kinase;N-acetyl-D-glucosamine kinase;GlcNAc kinase	6.9831e-28	0.58108		0.35576					1.886
AAKEEELLR	1057.58	IPI00004924	Differentially expressed in FDCP 6 homolog;IRF4-binding protein;cDNA, FLJ95623, highly similar to Homo sapiens differentially expressed in FDCP 6 homolog (mouse) (DEF6), mRNA;cDNA FLJ36294 fis, clone THYMU2004123, highly similar to Homo sapiens differentially expressed in FDCP 6 homolog (mouse) (DEF6), mRNA;Differentially expressed in FDCP 6 homolog (Mouse), isoform CRA_b	0.023472			0.52127						0.43729
AAKVFESIGK	1048.59	IPI00017334	Prohibitin;cDNA FLJ78511, highly similar to Homo sapiens prohibitin (PHB), mRNA;Prohibitin, isoform CRA_a;cDNA, FLJ93035, Homo sapiens prohibitin (PHB), mRNA;PHB protein;Prohibitin variant;Putative uncharacterized protein PHB;cDNA FLJ51562, highly similar to Prohibitin;ZNF607 protein	0.051346			0.87746		0.11929
AALAALCPGDLIQAINGESTELMTHLEAQNR	3306.63	IPI00032206	PDZ and LIM domain protein 4;LIM protein RIL;Reversion-induced LIM protein;PDZ and LIM domain 4, isoform CRA_c;cDNA, FLJ94066, Homo sapiens PDZ and LIM domain 4 (PDLIM4), mRNA;LIM domain protein;PDZ and LIM domain 4, isoform CRA_a	6.9145e-22									0.0021055
AALADDFDTPR	1190.56	IPI00336016	Probable cysteinyl-tRNA synthetase, mitochondrial;Cysteine--tRNA ligase;Putative uncharacterized protein DKFZp686G08243;Putative uncharacterized protein DKFZp667A2315	2.4065e-07		0.35871	0.25191			0.15159		0.17647	0.10849
AALADVLR	827.486	IPI00001466	Echinoderm microtubule-associated protein-like 4;Restrictedly overexpressed proliferation-associated protein;Ropp 120;EML4 protein;Putative uncharacterized protein EML4	0.0040364			0.70902						1.1412
AALAEITEMVAQLHGTMIK	2026.06	IPI00746455	FERM, RhoGEF and pleckstrin domain-containing protein 1;Chondrocyte-derived ezrin-like protein;FERM, RhoGEF (ARHGEF) and pleckstrin domain protein 1 (Chondrocyte-derived)	0.0088686						0.22319
AALAFGFLDLLK	1277.74	IPI00306017	cDNA FLJ55475;UPF0464 protein C15orf44;cDNA FLJ52585;cDNA FLJ50723;cDNA FLJ50705;cDNA FLJ50701	1.9337e-34	1.148		1.2231	1.2418		1.3827	1.3196	2.0783	1.424
AALAHPFFQDVTKPVPHLR	2143.17	IPI00031681	Cell division protein kinase 2;p33 protein kinase;cDNA FLJ76907, highly similar to Homo sapiens cyclin-dependent kinase 2 (CDK2), transcript variant 1, mRNA;Cyclin-dependent kinase 2, isoform CRA_b;D-HSCDK2;cDNA FLJ54979, highly similar to Homo sapiens cyclin-dependent kinase 2 (CDK2), transcript variant 2, mRNA	0.43664		0.93276					1.1285	1.7253
AALAHSEEVTASQVAATK	1782.91	IPI00014898	Plectin-1;Hemidesmosomal protein 1;Similar to plectin 1, intermediate filament binding protein, 500kD;HCG1994702;Plectin isoform 1b	8.9844e-126	0.77269	0.48398	0.36165	2.3513	1.4881	1.8595	0.2437	0.21455	0.19443
AALALQITNLLTR	1396.84	IPI00004317	DNA polymerase subunit gamma-1;Mitochondrial DNA polymerase catalytic subunit;PolG-alpha;cDNA FLJ78646, highly similar to Homo sapiens polymerase (DNA directed), gamma (POLG), mRNA;Mitochondrial DNA polymerase gamma;DNA polymerase gamma	2.509e-19							1.0923	1.178
AALANLCIGDVITAIDGENTSNMTHLEAQNR	3311.59	IPI00010414	PDZ and LIM domain protein 1;Elfin;LIM domain protein CLP-36;C-terminal LIM domain protein 1	7.2164e-38			0.28427						0.0336
AALAPELALEIPSGSQADIPLPK	2300.26	IPI00856045	Protein AHNAK2	2.0581e-05
AALAPLPPLPAQFK	1432.84	IPI00017160	Vacuolar protein sorting-associated protein VTA1 homolog;Dopamine-responsive protein DRG-1;SKD1 binding protein 1;LYST-interacting protein 5;LYST-interacting protein LIP5	1.247e-25	0.80239	0.88543	0.66692	1.9011	1.6418	1.3661	1.2645	1.0024	0.78109
AALCHFCIDMLNAK	1662.77	IPI00009253	Alpha-soluble NSF attachment protein;N-ethylmaleimide-sensitive factor attachment protein alpha;cDNA FLJ78349, highly similar to Homo sapiens N-ethylmaleimide-sensitive factor attachment protein, alpha (NAPA), mRNA;N-ethylmaleimide-sensitive factor attachment protein, alpha, isoform CRA_c	3.6842e-34	0.45485	0.45491	0.52767			0.6865	0.92807	0.82074	1.0264
AALDGGVASAASPESKPSPGTK	1997.01	IPI00294840	Absent in melanoma 1 protein;Beta/gamma crystallin domain-containing protein 1;cDNA FLJ32143 fis, clone PLACE5000080, highly similar to Absent in melanoma 1 protein;cDNA FLJ43147 fis, clone CTONG3008639, highly similar to Absent in melanoma 1 protein;cDNA, FLJ79186, highly similar to Absent in melanoma 1 protein	4.5044e-07									0.028904
AALDGTPGMIGYGMAK	1551.74	IPI00014439	Dihydropteridine reductase;HDHPR;Quinoid dihydropteridine reductase;cDNA FLJ76220, highly similar to Homo sapiens quinoid dihydropteridine reductase (QDPR), mRNA;Quinoid dihydropteridine reductase, isoform CRA_d;cDNA FLJ55000, highly similar to Dihydropteridine reductase (EC 1.5.1.34);Quinoid dihydropteridine reductase, isoform CRA_c;cDNA FLJ42391 fis, clone 3NB692002806, highly similar to Dihydr…	2.1052e-50	1.3482	1.4695		0.42299	0.51433		0.36588	0.31248	0.13002
AALDSLSLFTSLGLSEQK	1878.99	IPI00026665	cDNA FLJ75085, highly similar to Homo sapiens glutaminyl-tRNA synthetase (QARS), mRNA;Glutaminyl-tRNA synthetase variant;Glutaminyl-tRNA synthetase;Glutamine--tRNA ligase;QARS protein;cDNA FLJ54314, highly similar to Glutaminyl-tRNA synthetase (EC 6.1.1.18);cDNA FLJ54453, highly similar to Glutaminyl-tRNA synthetase (EC 6.1.1.18);cDNA FLJ55601, highly similar to Glutaminyl-tRNA synthetase (EC 6.1…	4.3803e-110	0.75867		0.72573			0.8794		1.1139
AALEAIDELDLFGAHGGRK	1982.02	IPI00004237	Phosphorylase b kinase regulatory subunit alpha, liver isoform;cDNA FLJ75399, highly similar to Homo sapiens phosphorylase kinase, alpha 2 (liver) (PHKA2), mRNA;Phosphorylase kinase, alpha 2 (Liver)	9.1453e-07							2.3186	1.3083
AALEALDELDLFGVK	1602.85	IPI00216725	Putative uncharacterized protein PHKA1;Phosphorylase b kinase regulatory subunit alpha, skeletal muscle isoform;Phosphorylase kinase, alpha 1 (Muscle);PHKA1 protein	4.4127e-06			0.77276
AALEALGSCLNNK	1359.68	IPI00002520	Serine hydroxymethyltransferase, mitochondrial;Glycine hydroxymethyltransferase;Serine hydroxymethyltransferase	1.002e-43	1.0931	1.2793	1.0319	0.84343	0.95946	0.7326	1.7676	0.87077	1.5707
AALEALLPYTER	1345.72	IPI00477971	Transducin beta-like protein 3;WD repeat-containing protein SAZD;TBL3 protein	0.026099									1.3299
AALEAQNALHNMK	1409.71	IPI00853009	CUG-BP- and ETR-3-like factor 1;Bruno-like protein 2;RNA-binding protein BRUNOL-2;CUG triplet repeat RNA-binding protein 1;Deadenylation factor CUG-BP;50 kDa nuclear polyadenylated RNA-binding protein;Embryo deadenylation element-binding protein homolog;cDNA FLJ61559, highly similar to CUG triplet repeat RNA-binding protein 1	3.6459e-34	1.4918	1.9957	1.6519	1.9183	2.7068	1.6246	1.3572	1.4665	1.8043
AALEAVGGTVVLE	1227.67	IPI00005537	39S ribosomal protein L12, mitochondrial;5c5-2;Mitochondrial ribosomal protein L7/L12	0.00066987
AALEDTLAETEAR	1388.68	CON_IPI00479145	Keratin, type I cytoskeletal 19;Cytokeratin-19;Keratin-19	1.002e-43	3.7948	2.6279	2.519	0.79393	0.88744	1.0959	6.1697	7.8535	23.118
AALEEANGEIEK	1272.62	IPI00180781	Mixed lineage kinase domain-like protein;Putative uncharacterized protein DKFZp667E1714	8.1906e-14		1.8795					1.5461		1.9351
AALEEGSSQPTER	1373.64	IPI00045491	Gamma-tubulin complex component 6;TUBGCP6 protein	0.28793	0.89988
AALEELQR	928.498	IPI00033516	Gamma-tubulin complex component 3;Spindle pole body protein Spc98 homolog;cDNA FLJ55435, highly similar to Gamma-tubulin complex component 3;Tubulin, gamma complex associated protein 3;Tubulin, gamma complex associated protein 3, isoform CRA_b;cDNA, FLJ95655, Homo sapiens tubulin, gamma complex associated protein 3 (TUBGCP3), mRNA	0.033533			0.45612
AALEELVK	871.501	IPI00021808	Histidyl-tRNA synthetase, cytoplasmic;Histidine--tRNA ligase;cDNA FLJ42841 fis, clone BRCOC2003213, highly similar to Histidyl-tRNA synthetase (EC 6.1.1.21);Histidyl-tRNA synthetase, isoform CRA_a;Histidyl-tRNA synthetase;cDNA FLJ53703, highly similar to Histidyl-tRNA synthetase (EC 6.1.1.21);cDNA FLJ53452, highly similar to Histidyl-tRNA synthetase (EC 6.1.1.21);cDNA FLJ58554, highly similar to …	0.020806	1.2331	1.8978	1.6537		0.85097	1.0287	0.97388		0.87971
AALEEVER	915.466	IPI00014898	Plectin-1;Hemidesmosomal protein 1;Similar to plectin 1, intermediate filament binding protein, 500kD;HCG1994702;Plectin isoform 1b	0.00035261	0.8036	0.55068	0.39173	0.89455	1.8452		0.21635	0.19138	0.18363
AALEEVERLK	1156.65	IPI00014898	Plectin-1;Hemidesmosomal protein 1;Similar to plectin 1, intermediate filament binding protein, 500kD;HCG1994702;Plectin isoform 1b	0.018797		0.57					0.24273	0.19484
AALEEVYPDLTPEETRR	1987.99	IPI00100151	5'-3' exoribonuclease 2;DHM1-like protein;cDNA FLJ10711 fis, clone NT2RP3000917, highly similar to 5'-3' exoribonuclease 2 (EC 3.1.11.-);cDNA FLJ55645, highly similar to 5'-3' exoribonuclease 2 (EC 3.1.11.-);cDNA FLJ54526, highly similar to 5'-3' exoribonuclease 2 (EC 3.1.11.-)	0.0011485	1.2641				1.0464	1.1555	1.1224		1.9719
AALEGTATYR	1051.53	IPI00148063	Heme-binding protein 1;p22HBP;cDNA FLJ75999, highly similar to Homo sapiens heme binding protein 1 (HEBP1), mRNA;Heme binding protein 1, isoform CRA_a	0.012569			1.4413	0.4042	0.31008	0.3747	1.3058		0.86353
AALEQLLK	884.533	IPI00023344	Symplekin;cDNA FLJ61705, highly similar to Symplekin;SYMPK variant protein	0.033533			1.1068		1.8252	1.2173	3.0894	2.7598	1.801
AALEQR	686.371	IPI00073096	Apoptotic chromatin condensation inducer in the nucleus;ACIN1 protein;Putative uncharacterized protein DKFZp667N107;cDNA FLJ50838, highly similar to Apoptotic chromatin condensation inducer in thenucleus;Tripartite motif-containing protein 29;Ataxia-telangiectasia group D-associated protein;cDNA FLJ52736, highly similar to Tripartite motif-containing protein 29;cDNA FLJ60841, highly similar to Tr…	0.21321
AALETDENLLLCAPTGAGK	1942.97	IPI00420014	U5 small nuclear ribonucleoprotein 200 kDa helicase;U5 snRNP-specific 200 kDa protein;Activating signal cointegrator 1 complex subunit 3-like 1;BRR2 homolog;SNRNP200 protein;cDNA FLJ55548, highly similar to U5 small nuclear ribonucleoprotein 200 kDa helicase (EC 3.6.1.-);cDNA FLJ13778 fis, clone PLACE4000431, highly similar to H.sapiens U5 snRNP-specific 200kD protein;PRO2281;Putative RNA helicase	1.6961e-13		0.64084			1.0427
AALEYLEDIDLK	1391.72	IPI00296190	Uncharacterized protein C10orf58;Putative uncharacterized protein C10orf58;cDNA, FLJ96497	2.2374e-27			3.8255		0.26375	0.43203			1.323
AALFALQNLFEEK	1492.79	IPI00743284	Methionine synthase;5-methyltetrahydrofolate--homocysteine methyltransferase;Vitamin-B12 dependent methionine synthase;MTR protein;5-methyltetrahydrofolate-homocysteine methyltransferase;cDNA FLJ56487, highly similar to Methionine synthase (EC 2.1.1.13)	2.1069e-14			0.91491			0.86927
AALGEPVRLER	1209.68	IPI00019997	Lin-7 homolog C;Mammalian lin-seven protein 3;Vertebrate lin-7 homolog 3;Lin-7 homolog C variant	3.8404e-06	1.7677	0.21699	1.1334	0.54955	0.99767		1.0148	0.74942	1.1578
AALGGDGLR	828.445	IPI00031755	CAAX prenyl protease 2;Prenyl protein-specific endoprotease 2;Farnesylated proteins-converting enzyme 2;RCE1 homolog	3.6614e-11			1.186			1.2633
AALGHLAGEAAAAPGPGTPCASR	2102.03	IPI00867735	UPF0488 protein C8orf33	2.2488e-80	1.5025	1.0589	1.2937	0.92318	0.98647		1.273	1.3544	1.4007
AALGPLVTGLYDVQAFK	1761.97	IPI00003923	Uridine 5'-monophosphate synthase;Orotate phosphoribosyltransferase;Orotidine 5'-phosphate decarboxylase;OMPdecase;Uridine monophosphate synthetase isoform A;cDNA FLJ75687, highly similar to Homo sapiens uridine monophosphate synthetase (orotate phosphoribosyl transferase and orotidine-5'-decarboxylase) (UMPS), mRNA;Uridine monophosphate synthetase (Orotate phosphoribosyl transferase and orotidin…	1.0094e-115	0.82186	1.6351	1.5781	1.0755	2.1275	1.9691	1.9181	1.9522	1.825
AALGPSSQNVTEYVVR	1689.87	IPI00017450	General transcription factor IIF subunit 1;Transcription initiation factor IIF subunit alpha;Transcription initiation factor RAP74;General transcription factor IIF polypeptide 1 74 kDa subunit protein;General transcription factor IIF, polypeptide 1, 74kDa, isoform CRA_a;cDNA, FLJ96242, highly similar to Homo sapiens general transcription factor IIF, polypeptide 1, 74kDa (GTF2F1), mRNA;GTF2F1 prot…	2.1052e-50	0.72866	0.68556			1.2709
AALGPSSQNVTEYVVRVPK	2014.08	IPI00017450	General transcription factor IIF subunit 1;Transcription initiation factor IIF subunit alpha;Transcription initiation factor RAP74;General transcription factor IIF polypeptide 1 74 kDa subunit protein;General transcription factor IIF, polypeptide 1, 74kDa, isoform CRA_a;cDNA, FLJ96242, highly similar to Homo sapiens general transcription factor IIF, polypeptide 1, 74kDa (GTF2F1), mRNA;GTF2F1 prot…	0.050617		0.67856					0.91504	1.275
AALGSPSHTFR	1142.58	IPI00006932	Putative RNA-binding protein Luc7-like 2;cDNA FLJ36545 fis, clone TRACH2006670, highly similar to RNA-binding protein Luc7-like 2;cDNA FLJ55988, highly similar to RNA-binding protein Luc7-like 2;cDNA FLJ55994, highly similar to RNA-binding protein Luc7-like 2;UPF0562 protein C7orf55	7.5056e-29	2.4456	1.8475	2.1253	1.821	2.2295	1.7241	4.1241	3.574	4.0391
AALGVLESDLPSAVTLLK	1796.03	IPI00000162	Neuroguidin;EIF4E-binding protein;cDNA FLJ75745;HCG41742, isoform CRA_d;Putative uncharacterized protein NGDN	3.4341e-16			1.4663			1.1615
AALGVLR	698.444	IPI00911050	cDNA FLJ53329, highly similar to NADPH:adrenodoxin oxidoreductase, mitochondrial (EC 1.18.1.2);NADPH:adrenodoxin oxidoreductase, mitochondrial;Ferredoxin--NADP(+) reductase;cDNA FLJ59458, highly similar to NADPH:adrenodoxin oxidoreductase, mitochondrial (EC 1.18.1.2);cDNA FLJ54040, highly similar to NADPH:adrenodoxin oxidoreductase, mitochondrial (EC 1.18.1.2);cDNA FLJ54567, highly similar to NAD…	0.26392				1.1651		0.11395
AALGVQSINWQK	1313.71	IPI00300376	Protein-glutamine gamma-glutamyltransferase E;Transglutaminase-3;Protein-glutamine gamma-glutamyltransferase E 50 kDa non-catalytic chain;Protein-glutamine gamma-glutamyltransferase E 27 kDa catalytic chain;cDNA FLJ56823, highly similar to Protein-glutamine gamma-glutamyltransferase E (EC 2.3.2.13);cDNA FLJ57574, highly similar to Protein-glutamine gamma-glutamyltransferase E (EC 2.3.2.13)	7.2546e-06	0.27074
AALHLYSNTLNFQISEVEPK	2273.17	IPI00013184	N-terminal acetyltransferase complex ARD1 subunit homolog A;Putative uncharacterized protein ARD1A	2.8218e-09		1.3064	1.5183			1.1083	1.1438	1.2067	1.2623
AALHPPALAVLSHTPDGATQTIAWVGK	2721.46	IPI00100292	Probable aminopeptidase NPEPL1;Aminopeptidase-like 1;cDNA, FLJ96778, highly similar to Homo sapiens aminopeptidase-like 1 (NPEPL1), mRNA;cDNA FLJ55989, highly similar to Probable aminopeptidase NPEPL1 (EC 3.4.11.-);Putative uncharacterized protein NPEPL1	6.0935e-05	5.3819	4.1511	3.8714	2.5332	3.634		13.702	15.127
AALIIQQYFR	1221.69	IPI00016007	Myosin-Vc;MYO5C protein;HSPC089	0.00023232		3.3784		1.2088		1.094
AALIYTCTVCR	1326.64	IPI00183657	Zinc finger protein 706;cDNA FLJ76537, highly similar to Homo sapiens zinc finger protein 706 (ZNF706), mRNA;Zinc finger protein 706, isoform CRA_a;PNAS-106	3.8404e-06							0.49831
AALKADAQD	901.451	IPI00013167	28S ribosomal protein S25, mitochondrial;MRP-S25;Mitochondrial ribosomal protein S25	1									0.99444
AALLAELALLEPEALR	1691.98	IPI00477962	UDP-N-acetylhexosamine pyrophosphorylase-like protein 1;cDNA FLJ38074 fis, clone CTONG2015804, highly similar to Homo sapiens UDP-N-acteylglucosamine pyrophosphorylase 1-like 1 (UAP1L1), mRNA;UAP1L1 protein	2.2979e-37			0.68146			0.14364
AALLDQALSNAR	1241.67	IPI00256861	Microtubule-actin cross-linking factor 1, isoforms 1/2/3/5;Actin cross-linking family protein 7;Macrophin-1;Trabeculin-alpha;620 kDa actin-binding protein;ABP620;ACF7 protein;Microtubule-actin crosslinking factor 1;cDNA FLJ58849, highly similar to Microtubule-actin crosslinking factor 1, isoform 4;MACF1 protein;cDNA FLJ46776 fis, clone TRACH3026650, highly similar to Actin cross-linking family pr…	1		0.34645					0.14328
AALLDQIR	898.524	IPI00011676	Neural Wiskott-Aldrich syndrome protein;WASL protein;Wiskott-Aldrich syndrome-like;cDNA FLJ76749, highly similar to Homo sapiens Wiskott-Aldrich syndrome-like (WASL), mRNA;Putative uncharacterized protein DKFZp779G0847	0.0040364						0.72331		1.1002	0.70763
AALLELWELRR	1368.79	IPI00844215	Spectrin alpha chain, brain;Spectrin, non-erythroid alpha chain;Alpha-II spectrin;Fodrin alpha chain;cDNA FLJ59116, highly similar to Spectrin alpha chain, brain;Putative uncharacterized protein SPTAN1;cDNA FLJ61399, highly similar to Spectrin alpha chain, brain;Putative uncharacterized protein DKFZp564P0562	0.13171	0.5719	0.65212	0.39507	1.0712	0.95062	0.7243	0.62078	0.51905	0.33191
AALLETLSLLLAK	1354.84	IPI00001159	Translational activator GCN1;GCN1-like protein 1;cDNA FLJ54481, highly similar to GCN1-like protein 1	1.002e-43	1.474	1.9703	1.3243	0.97866			1.456	1.5316
AALLHGETR	966.525	IPI00876864	Ribonuclease P protein subunit p30;RNase P subunit 2;HCG25441;cDNA, FLJ93346, Homo sapiens ribonuclease P (30kD) (RPP30), mRNA;Ribonuclease P (30kD) (RPP30)	0.23807			1.0414						1.7511
AALLNFDEFAVSK	1423.73	IPI00001730	FH1/FH2 domain-containing protein 1;Formin homolog overexpressed in spleen 1;Formin homology 2 domain-containing protein 1;cDNA FLJ55372, highly similar to FH1/FH2 domain-containing protein	0.0045552			2.5193
AALLNQHYQVNFK	1544.81	IPI00923606	cDNA FLJ58269, highly similar to Bifunctional aminoacyl-tRNA synthetase;Glutamyl-prolyl-tRNA synthetase;EPRS protein;Bifunctional aminoacyl-tRNA synthetase;Proliferation-inducing gene 32 protein;Glutamyl-tRNA synthetase;Glutamate--tRNA ligase;Prolyl-tRNA synthetase;Proline--tRNA ligase;cDNA FLJ56021, highly similar to Bifunctional aminoacyl-tRNA synthetase[Includes: Glutamyl-tRNA synthetase (EC 6…	2.509e-19	0.33981	0.2711	0.37987	0.32584	0.41474	0.33011			0.81016
AALLWALAAALER	1367.79	IPI00217920	Aldehyde dehydrogenase family 16 member A1;cDNA FLJ51525, highly similar to Homo sapiens aldehyde dehydrogenase 16 family, member A1 (ALDH16A1), mRNA;cDNA FLJ51526, highly similar to Homo sapiens aldehyde dehydrogenase 16 family, member A1 (ALDH16A1), mRNA;cDNA FLJ60673, highly similar to Homo sapiens aldehyde dehydrogenase 16 family, member A1 (ALDH16A1), mRNA	3.6459e-34		1.7724					1.8017	1.022
AALMESQGQQQEER	1603.73	IPI00006196	Nuclear mitotic apparatus protein 1;SP-H antigen;cDNA FLJ76708, highly similar to Homo sapiens nuclear mitotic apparatus protein 1 (NUMA1), mRNA;NUMA1 protein;Nuclear mitotic apparatus protein 1 variant;Putative uncharacterized protein;Nuclear mitotic apparatus protein;NUMA1 variant protein	4.1974e-45			1.9122			1.505			2.6852
AALNALQPPEFR	1325.71	IPI00146447	Vacuolar ATPase assembly integral membrane protein VMA21;Myopathy with excessive autophagy protein	0.026099	2.2778				0.71415		1.3964	2.3061	1.214
AALNALQPPEFRNESSLASTLK	2356.24	IPI00146447	Vacuolar ATPase assembly integral membrane protein VMA21;Myopathy with excessive autophagy protein	0.012001							2.3752
AALNAVR	713.418	IPI00003527	Na(+)/H(+) exchange regulatory cofactor NHE-RF1;Ezrin-radixin-moesin-binding phosphoprotein 50;Regulatory cofactor of Na(+)/H(+) exchanger;Sodium-hydrogen exchanger regulatory factor 1;Solute carrier family 9 isoform A3 regulatory factor 1;cDNA, FLJ92860, highly similar to Homo sapiens solute carrier family 9 (sodium/hydrogen exchanger), member 3 regulator 1 (SLC9A3R1), mRNA;Solute carrier family…	0.011524						0.12388
AALNELLK	870.517	IPI00005634	Tetratricopeptide repeat protein 37	0.10158			1.109			0.36778	0.94427		0.44837
AALPDLTK	827.475	IPI00006713	DnaJ homolog subfamily C member 3;Interferon-induced, double-stranded RNA-activated protein kinase inhibitor;Protein kinase inhibitor of 58 kDa;Protein kinase inhibitor p58;cDNA FLJ77657, highly similar to Homo sapiens DnaJ (Hsp40) homolog, subfamily C, member 3 (DNAJC3), mRNA;DnaJ (Hsp40) homolog, subfamily C, member 3;cDNA, FLJ93304, Homo sapiens DnaJ (Hsp40) homolog, subfamily C, member 3 (DNA…	1									0.36823
AALPLTTSDTK	1116.6	IPI00179298	E3 ubiquitin-protein ligase HUWE1;HECT, UBA and WWE domain-containing protein 1;Upstream regulatory element-binding protein 1;Mcl-1 ubiquitin ligase E3;ARF-binding protein 1;Large structure of UREB1;Homologous to E6AP carboxyl terminus homologous protein 9;cDNA FLJ59294, highly similar to HECT, UBA and WWE domain-containing protein 1 (EC 6.3.2.-);HUWE1 protein;E3 ubiquitin protein ligase URE-B1 v…	0.0047897							1.2956	1.2679
AALPSHVVTMLDNFPTNLHPMSQLSAAVTALNSESNFAR	4151.06	IPI00025366	Citrate synthase, mitochondrial;Citrate synthase	1.8469e-06		0.91986					1.5646	1.5049
AALQEEEQASK	1202.58	IPI00867529	Kinesin-like protein KIF2A;HK2;cDNA FLJ56002, highly similar to Kinesin-like protein KIF2;cDNA, FLJ79515, highly similar to Kinesin-like protein KIF2	1.7748e-11		3.3011
AALQEELQLCK	1301.66	IPI00026781	Fatty acid synthase;[Acyl-carrier-protein] S-acetyltransferase;[Acyl-carrier-protein] S-malonyltransferase;3-oxoacyl-[acyl-carrier-protein] synthase;3-oxoacyl-[acyl-carrier-protein] reductase;3-hydroxypalmitoyl-[acyl-carrier-protein] dehydratase;Enoyl-[acyl-carrier-protein] reductase;Oleoyl-[acyl-carrier-protein] hydrolase;FASN protein	3.8404e-06	3.4501	4.0959	3.9188	0.92997		0.78981	1.7128		1.3557
AALQEELSDVLIYLVALAAR	2157.2	IPI00012197	dCTP pyrophosphatase 1;Deoxycytidine-triphosphatase 1;XTP3-transactivated gene A protein;RS21C6	1.71e-10							2.7086	2.5184
AALQELLSK	971.565	IPI00012750	40S ribosomal protein S25;Ribosomal protein S25, isoform CRA_b;cDNA, FLJ92149, Homo sapiens ribosomal protein S25 (RPS25), mRNA	1.2401e-13	1.3446	1.3263	1.4317	1.296	1.0548	1.2923	0.93982	1.0272	1.1895
AALQELLSKGLIK	1382.85	IPI00012750	40S ribosomal protein S25;Ribosomal protein S25, isoform CRA_b;cDNA, FLJ92149, Homo sapiens ribosomal protein S25 (RPS25), mRNA	0.054665					0.044081
AALQLVVDPGDPR	1349.73	IPI00014068	Serine/threonine-protein kinase PAK 4;p21-activated kinase 4;cDNA FLJ76899, highly similar to Homo sapiens p21(CDKN1A)-activated kinase 4 (PAK4), mRNA;cDNA FLJ55049, highly similar to Serine/threonine-protein kinase PAK 4 (EC 2.7.11.1);cDNA FLJ58808, highly similar to Homo sapiens p21(CDKN1A)-activated kinase 4 (PAK4), transcript variant 4, mRNA;P21(CDKN1A)-activated kinase 4, isoform CRA_c;cDNA …	0.00049402			0.90669		1.0893				2.2558
AALRDLGCHVELR	1508.79	IPI00020196	Armadillo repeat-containing protein 6;cDNA FLJ50945, highly similar to Armadillo repeat-containing protein 6	0.68863		2.1515		0.77079
AALRDYETVVK	1263.68	IPI00019812	Serine/threonine-protein phosphatase 5;Protein phosphatase T;Serine/threonine protein phosphatase;Putative uncharacterized protein PPP5C	0.0047813	0.68853	0.94765	0.61809	1.2161	0.49245	0.55843			0.59371
AALRPLVKPK	1091.72	IPI00927658	60S ribosomal protein L32;Ribosomal protein L32, isoform CRA_a;cDNA, FLJ92175, Homo sapiens ribosomal protein L32 (RPL32), mRNA	0.6481		2.3431						0.96796
AALRPTDVVLEVGPGTGNMTVK	2224.19	IPI00004459	Probable dimethyladenosine transferase;S-adenosylmethionine-6-N',N'-adenosyl(rRNA) dimethyltransferase;18S rRNA dimethylase;DIM1 dimethyladenosine transferase 1-like;cDNA FLJ75823, highly similar to Homo sapiens dimethyladenosine transferase (HSA9761), mRNA;cDNA FLJ56719, highly similar to Probable dimethyladenosine transferase (EC 2.1.1.-)	5.9959e-08	2.2981			1.6475	3.5774
AALRQPQVAELLAEAR	1734.97	IPI00019383	Galactokinase 1;cDNA FLJ56840, highly similar to Galactokinase (EC 2.7.1.6);Galactokinase;Galactose kinase;cDNA FLJ56765, highly similar to Galactokinase (EC 2.7.1.6);cDNA, FLJ79080, highly similar to Galactokinase (EC 2.7.1.6);CDNA FLJ26554 fis, clone LNF01773, highly similar to Galactokinase;Putative uncharacterized protein GALK1	2.5557e-28		4.4812					19.678
AALSALESFLK	1148.64	IPI00296337	DNA-dependent protein kinase catalytic subunit;DNPK1;p460;cDNA FLJ57825, highly similar to DNA-dependent protein kinase catalytic subunit (EC 2.7.11.1)	5.4093e-10	0.63034	0.74376	0.66142	0.70779	0.82467	0.58316	1.2071	0.96738	1.2196
AALSASEGEEVPQDK	1529.72	IPI00000690	Apoptosis-inducing factor 1, mitochondrial;Programmed cell death protein 8;Apoptosis-inducing factor, mitochondrion-associated, 1;Programmed cell death 8 (Apoptosis-inducing factor), isoform CRA_b;Apoptosis-inducing factor;Striatal apoptosis-inducing factor;Apoptosis-inducing factor short isoform 3;Apoptosis-inducing factor short isoform 2	6.4616e-42	2.1238	2.3416		1.0094	1.3719	0.70233	3.5503	3.545
AALSASEGEEVPQDKAPSHVPFLLIGGGTAAFAAAR	3534.81	IPI00000690	Apoptosis-inducing factor 1, mitochondrial;Programmed cell death protein 8;Apoptosis-inducing factor, mitochondrion-associated, 1;Programmed cell death 8 (Apoptosis-inducing factor), isoform CRA_b;Apoptosis-inducing factor;Striatal apoptosis-inducing factor;Apoptosis-inducing factor short isoform 3;Apoptosis-inducing factor short isoform 2	0.0064678			1.9856			0.60931			1.9323
AALSEEELEK	1117.55	IPI00927510	Eukaryotic translation initiation factor 4 gamma 1;p220;cDNA FLJ56483, highly similar to Eukaryotic translation initiation factor 4 gamma 1	0.00029384	1.4227	1.3492			2.412		1.4018
AALSEEELEKK	1245.65	IPI00927510	Eukaryotic translation initiation factor 4 gamma 1;p220;cDNA FLJ56483, highly similar to Eukaryotic translation initiation factor 4 gamma 1	0.0047813			1.6636						1.498
AALSEMVEYITHNR	1632.79	IPI00012834	Serine/threonine-protein phosphatase 2A 56 kDa regulatory subunit gamma isoform;PP2A, B subunit, B' gamma isoform;PP2A, B subunit, B56 gamma isoform;PP2A, B subunit, PR61 gamma isoform;PP2A, B subunit, R5 gamma isoform;Renal carcinoma antigen NY-REN-29;cDNA FLJ57234, highly similar to Serine/threonine-protein phosphatase 2A 56 kDa regulatory subunit gamma isoform;Protein phosphatase 2, regulatory…	1.8407e-21			1.2402			1.8691			2.4028
AALSGANVLTLIEK	1398.81	IPI00020557	Prolow-density lipoprotein receptor-related protein 1;Alpha-2-macroglobulin receptor;Apolipoprotein E receptor;Low-density lipoprotein receptor-related protein 1 85 kDa subunit;Low-density lipoprotein receptor-related protein 1 515 kDa subunit;Low-density lipoprotein receptor-related protein 1 intracellular domain;Low density lipoprotein-related protein 1 variant;LRP protein;Alpha-2 macroglobulin…	1.8407e-21								0.037102	0.27003
AALSGSYVNFGVFR	1486.76	IPI00855940	cDNA FLJ76855, highly similar to Homo sapiens exportin 7 (XPO7), mRNA;Exportin-7;Ran-binding protein 16;cDNA FLJ56596, highly similar to Exportin-7	1.247e-25	1.3075	1.3043		1.2711	1.7404		1.0185
AALSSQQQQQLALLLQQFQTLK	2484.37	IPI00647635	PERQ amino acid-rich with GYF domain-containing protein 2;GRB10-interacting GYF protein 2;Trinucleotide repeat-containing gene 15 protein;GIGYF2 protein;cDNA FLJ61363, highly similar to Homo sapiens trinucleotide repeat containing 15 (TNRC15), mRNA;GRB10 interacting GYF protein 2;Trinucleotide repeat containing 15, isoform CRA_a;cDNA FLJ58310, highly similar to Homo sapiens trinucleotide repeat c…	8.7868e-30	1.1999	1.4838					0.67916	0.96514
AALTAEHFAALQSLLK	1682.94	IPI00305212	COMM domain-containing protein 9;cDNA FLJ58381, highly similar to COMM domain-containing protein 9;cDNA FLJ51530, highly similar to COMM domain-containing protein 9;COMM domain containing 9 variant;cDNA FLJ31106 fis, clone IMR322000144, highly similar to COMM domain-containing protein 9;cDNA FLJ78335, highly similar to Homo sapiens COMM domain containing 9, mRNA;COMM domain containing 9, isoform …	6.9896e-134			1.0171		2.707	1.4871	1.1169	1.0543	1.3124
AALTIDEK	859.465	CON_00695489		0.0040364	0.0037527	0.0032366		0.068198		0.0054884	0.0033999	0.002383
AALTRDPQFQK	1273.68	IPI00027497	Glucose-6-phosphate isomerase;Phosphoglucose isomerase;Phosphohexose isomerase;Autocrine motility factor;Neuroleukin;Sperm antigen 36	0.0013428	1.0788	1.7433	1.5157	0.91884	0.99322	0.8002	0.82686	0.64038	0.79759
AALTSALSIQNYHLECTETQAWMR	2793.32	IPI00012645	Spectrin beta chain, brain 2;Spectrin, non-erythroid beta chain 2;Beta-III spectrin	4.2515e-21		2.8102
AALTTLFK	863.512	IPI00177728	Cytosolic non-specific dipeptidase;CNDP dipeptidase 2;Glutamate carboxypeptidase-like protein 1;Peptidase A;cDNA FLJ39836 fis, clone SPLEN2014073, highly similar to Cytosolic nonspecific dipeptidase;cDNA FLJ56358, highly similar to Cytosolic nonspecific dipeptidase;cDNA FLJ54170, highly similar to Cytosolic nonspecific dipeptidase;PP856;CNDP dipeptidase 2 (Metallopeptidase M20 family), isoform CR…	3.3035e-16	0.6181	0.78808	0.48035	0.64146	0.47438	0.58504	1.1414	0.87248	0.7792
AALVAQNYINYQQGTPHR	2043.03	IPI00106687	Latexin;Endogenous carboxypeptidase inhibitor;Tissue carboxypeptidase inhibitor;MUM	3.2302e-77	7.4891	4.6339	10.178	4.2934	9.4512	19.903	6.9613	5.7859	18.371
AALVAQNYINYQQGTPHRVFEVQK	2773.43	IPI00106687	Latexin;Endogenous carboxypeptidase inhibitor;Tissue carboxypeptidase inhibitor;MUM	2.3414e-08							12.929
AALVDLEPGTMDSVR	1572.78	IPI00646779	Tubulin beta-6 chain;cDNA FLJ35358 fis, clone PUAEN2000497, highly similar to Tubulin beta-6 chain;Tubulin, beta 6, isoform CRA_a;TUBB6 protein;cDNA FLJ52712, highly similar to Tubulin beta-6 chain;cDNA FLJ52847, highly similar to Tubulin beta-6 chain	6.4616e-42	0.33438	0.416	0.34127		10.037			0.10502	0.098146
AALVDYLDGK	1063.56	IPI00005634	Tetratricopeptide repeat protein 37	0.00029384			1.4918			0.54464	0.80999	0.69476	0.47611
AALVLEDGSVLR	1241.7	IPI00301263	CAD protein;Glutamine-dependent carbamoyl-phosphate synthase;Aspartate carbamoyltransferase;Dihydroorotase;Putative uncharacterized protein CAD	2.2374e-27	2.1032	2.0244	1.8902	1.9702		3.4301	1.6347	1.6326
AALVVLENYYK	1281.7	IPI00031195	Vang-like protein 1;Van Gogh-like protein 1;Strabismus 2;Loop-tail protein 2 homolog;Vang-like 1 (Van gogh, Drosophila);Vang-like 1 (Van gogh, Drosophila), isoform CRA_b;Vang-like 1 (Van gogh, Drosophila), isoform CRA_a	5.4093e-10	2.7106		2.4987				1.3627	2.4946	4.9932
AAMAVGGAGGSR	1003.49	IPI00441473	Protein arginine N-methyltransferase 5;Histone-arginine N-methyltransferase PRMT5;Shk1 kinase-binding protein 1 homolog;SKB1Hs;Jak-binding protein 1;72 kDa ICln-binding protein;cDNA, FLJ96564, highly similar to Homo sapiens SKB1 homolog (S. pombe) (SKB1), mRNA;Protein arginine methyltransferase 5 isoform a (Protein arginine methyltransferase 5, isoform CRA_b);cDNA FLJ54566, highly similar to Prot…	8.1906e-14	1.1439	1.9482	1.4868	1.4083	1.2921		1.5846	1.6673	1.1808
AAMDNSEIAGEK	1234.55	IPI00554469	Mitochondrial inner membrane protein;Mitofilin;p87/89;Cell proliferation-inducing gene 4 protein;cDNA FLJ51884, highly similar to Mitochondrial inner membrane protein;cDNA FLJ54290, highly similar to Mitochondrial inner membrane protein;Putative uncharacterized protein IMMT;IMMT protein;Cell proliferation-inducing protein 52;cDNA, FLJ92546, highly similar to Homo sapiens inner membrane protein, m…	1.5141e-09		0.60592	1.1895			0.6484	0.41169	0.59638	0.70128
AAMDNSEIAGEKK	1362.64	IPI00554469	Mitochondrial inner membrane protein;Mitofilin;p87/89;Cell proliferation-inducing gene 4 protein;cDNA FLJ51884, highly similar to Mitochondrial inner membrane protein;cDNA FLJ54290, highly similar to Mitochondrial inner membrane protein;Putative uncharacterized protein IMMT;IMMT protein;Cell proliferation-inducing protein 52;cDNA, FLJ92546, highly similar to Homo sapiens inner membrane protein, m…	0.093726			1.1945			0.92351			0.70113
AAMEPIVISAK	1128.62	IPI00298994	Talin-1;Talin 1	0.00012968	0.45162	0.36662	0.19906	0.82022	0.67076		0.41628	0.21816	0.21105
AAMFPETLDEGMQIPSTQFDAAHPTNVQR	3201.49	IPI00017292	Catenin beta-1;Beta-catenin;Catenin (Cadherin-associated protein), beta 1, 88kDa, isoform CRA_a;cDNA FLJ78465, highly similar to Homo sapiens catenin (cadherin-associated protein), beta 1, 88kDa (CTNNB1), mRNA;cDNA FLJ57878, highly similar to Beta-catenin;cDNA FLJ59415, highly similar to Beta-catenin	0.0055121	0.21344						0.26225
AAMFTAGSNFNHVVQNEK	1963.92	IPI00031458	Protein-S-isoprenylcysteine O-methyltransferase;Isoprenylcysteine carboxylmethyltransferase;Prenylcysteine carboxyl methyltransferase;Prenylated protein carboxyl methyltransferase;cDNA FLJ35571 fis, clone SPLEN2005806, highly similar to Protein-S-isoprenylcysteineO-methyltransferase (EC 2.1.1.100);ICMT protein;Isoprenylcysteine carboxyl methyltransferase;Isoprenylcysteine carboxyl methyltransfera…	0.00049446	0.60842				1.7013		0.48331		0.37748
AAMIWIVGEYAER	1507.75	IPI00328257	AP-1 complex subunit beta-1;Adapter-related protein complex 1 subunit beta-1;Adaptor protein complex AP-1 subunit beta-1;Beta-adaptin 1;Beta1-adaptin;Golgi adaptor HA1/AP1 adaptin beta subunit;Clathrin assembly protein complex 1 beta large chain;cDNA FLJ56967, highly similar to Adapter-relatedprotein complex 1 beta-1 subunit;cDNA FLJ56828, highly similar to Adapter-relatedprotein complex 1 beta-1…	2.509e-19	0.81814				0.87642
AAMLIK	645.388	IPI00023630	Apoptotic protease-activating factor 1;Apoptotic peptidase activating factor 1;Apoptotic peptidase activating factor, isoform CRA_d;APAF1 protein	1		0.19796	0.24068	1.3325		1.0465	1.0671	1.1233	1.5182
AAMNNSFIYIK	1270.64	IPI00373894	UPF0378 protein KIAA0100;Breast cancer overexpressed gene 1 protein;Antigen MLAA-22;KIAA0100 protein	1	1.1524		1.374			1.3276	1.0495		0.68126
AAMTSLMDLTLLLAR	1618.88	IPI00030774	Tubulin-specific chaperone D;Tubulin-folding cofactor D;Beta-tubulin cofactor D;SSD-1;cDNA FLJ61213, highly similar to Tubulin-specific chaperone D	3.0774e-24	0.38202	0.62155
AAMWNPSIFLK	1276.66	IPI00015804	tRNA-dihydrouridine synthase 2-like;Up-regulated in lung cancer;URLC8;cDNA FLJ77655;Dihydrouridine synthase 2-like, SMM1 homolog (S. cerevisiae), isoform CRA_a;cDNA FLJ52317, highly similar to tRNA-dihydrouridine synthase 2-like (EC 1.-.-.-)	5.4093e-10		1.9949
AANAAENDFSVSQAEMSSR	1983.86	IPI00873899	ATP-binding cassette sub-family F member 1;ATP-binding cassette 50;TNF-alpha-stimulated ABC protein;ATP-binding cassette sub-family F (GCN20) member 1;ATP-binding cassette, sub-family F (GCN20), member 1;ATP-binding cassette, sub-family F, member 1 variant;ABC50 protein;ATP-binding cassette, sub-family F (GCN20), member 1, isoform CRA_a;ABCF1 protein;cDNA FLJ56536, highly similar to ATP-binding c…	8.4795e-86	0.99454	1.1473			1.9578
AANATTNPSQLLPLELVDK	1994.07	IPI00220493	U6 snRNA-associated Sm-like protein LSm5;Putative uncharacterized protein LSM5	1.4695e-158	3.7605	1.6198				1.4432		1.639
AANDAGYFNDEMAPIEVK	1953.88	IPI00873829	Putative uncharacterized protein ACAA2;3-ketoacyl-CoA thiolase, mitochondrial;Beta-ketothiolase;Acetyl-CoA acyltransferase;Mitochondrial 3-oxoacyl-CoA thiolase;T1;cDNA, FLJ95265, highly similar to Homo sapiens acetyl-Coenzyme A acyltransferase 2 (mitochondrial 3-oxoacyl-Coenzyme A thiolase) (ACAA2), nuclear gene encoding mitochondrial protein, mRNA;cDNA FLJ30111 fis, clone BNGH42000360, highly si…	7.1535e-62	2.3127	0.81788	2.1594		0.43205	0.31383	1.7576	1.8027	0.92514
AANDPFTIVHGNTGK	1540.76	IPI00789911	Lymphocyte antigen 75;DEC-205;gp200-MR6;Lymphocyte antigen 75 variant	0.079393	0.40852						0.11665
AANGVVLATEK	1071.59	IPI00219622	Proteasome subunit alpha type-2;Proteasome component C3;Macropain subunit C3;Multicatalytic endopeptidase complex subunit C3;Proteasome subunit alpha type;Putative uncharacterized protein DKFZp686D09174;Proteasome (Prosome, macropain) subunit, alpha type, 2, isoform CRA_a	5.4093e-10	1.1891	1.9006	1.5839	1.4377	1.763	1.5137	1.2855	1.454	1.3238
AANILVGENLVCK	1399.75	IPI00328867	Proto-oncogene tyrosine-protein kinase Yes;p61-Yes;c-Yes;cDNA, FLJ94729, highly similar to Homo sapiens v-yes-1 Yamaguchi sarcoma viral oncogene homolog 1(YES1), mRNA;PRO3078;Proto-oncogene tyrosine-protein kinase Src;pp60c-src;V-src sarcoma (Schmidt-Ruppin A-2) viral oncogene homolog (Avian);V-src sarcoma (Schmidt-Ruppin A-2) viral oncogene homolog (Avian), isoform CRA_d;Tyrosine kinase pp60c-sr…	6.9831e-28	0.49978	0.46344	0.50729	0.55353		0.66652		0.85817	0.62375
AANIPEHNTIGFMFACVGR	2104	IPI00183208	F-box only protein 22;F-box protein FBX22p44;cDNA FLJ50132, highly similar to F-box only protein 22;F-box only protein 22 isoform a variant	1.1479e-07	3.5479	2.4856	3.8795	1.45	1.7471	1.1019	1.5216	1.2246	1.2292
AANMIPAHDSPLAALAFDASGTK	2268.12	IPI00024056	WD repeat domain phosphoinositide-interacting protein 2;WIPI49-like protein 2;cDNA FLJ12979 fis, clone NT2RP2006334, highly similar to WD repeat domain phosphoinositide-interacting protein 2;cDNA FLJ14217 fis, clone NT2RP3003680, highly similar to WD repeat domain phosphoinositide-interacting protein 2;WD repeat domain, phosphoinositide interacting 2, isoform CRA_d;cDNA FLJ42984 fis, clone BRTHA2…	4.8065e-08	2.0717	0.33925			1.4138				0.72143
AANMYR	724.333	IPI00171798	Metastasis-associated protein MTA2;Metastasis-associated 1-like 1;p53 target protein in deacetylase complex;Putative uncharacterized protein DKFZp686F2281;cDNA FLJ51637, highly similar to Metastasis-associated protein MTA2;Putative uncharacterized protein tmp_locus_6;Full-length cDNA 5-PRIME end of clone CS0DK005YC03 of HeLa cells of Homo sapiens (human);Full-length cDNA 5-PRIME end of clone CS0D…	0.86552			1.3086
AANNGALPPDLSYIVR	1669.88	IPI00029264	Cytochrome c1, heme protein, mitochondrial;Ubiquinol-cytochrome-c reductase complex cytochrome c1 subunit;Cytochrome b-c1 complex subunit 4;Complex III subunit 4;Complex III subunit IV;Putative uncharacterized protein	2.8257e-10	1.3767	0.58632	1.2751	0.41614	0.16893	0.41118	1.3709	1.2372	1.6588
AANNIASLLTK	1114.63	IPI00306127	THUMP domain-containing protein 3	0.0047897		1.0748					2.0048	2.0749
AANPGCSLEDFVR	1434.66	IPI00927682	Rab3 GTPase-activating protein catalytic subunit;RAB3 GTPase-activating protein 130 kDa subunit;Rab3-GAP p130;RAB3GAP1 protein;RAB3 GTPase activating protein subunit 1;RAB3 GTPase activating protein subunit 1 (Catalytic), isoform CRA_d	2.509e-19	0.51794	0.41618			0.66368		0.2988		0.35197
AANPVDFLSK	1060.56	IPI00217686	Putative rRNA methyltransferase 3;rRNA (uridine-2'-O-)-methyltransferase 3;cDNA FLJ53449, highly similar to rRNA methyltransferase 3 (EC 2.1.1.-)	1.0082e-05			1.398	0.63919		0.71989
AANSLEAFIFETQDK	1682.82	IPI00000877	Hypoxia up-regulated protein 1;150 kDa oxygen-regulated protein;Orp150;Oxigen-regulated protein 150;cDNA, FLJ94899, Homo sapiens hypoxia up-regulated 1 (HYOU1), mRNA;cDNA FLJ45395 fis, clone BRHIP3027191, highly similar to 150 kDa oxygen-regulated protein (Orp150);cDNA FLJ59408, highly similar to 150 kDa oxygen-regulated protein (Orp150);cDNA FLJ54564, highly similar to 150 kDa oxygen-regulated p…	3.0774e-24	6.7763	1.9481			1.7405	32.769	1.8135
AANVFPFR	920.487	IPI00292787	Actin-related protein 5;Sarcoma antigen NY-SAR-16	0.37971	0.49855		0.56557						1.1833
AANVLLSEHGEVK	1365.73	IPI00335281	Serine/threonine-protein kinase 24;STE20-like kinase MST3;Mammalian STE20-like protein kinase 3;cDNA FLJ60706, highly similar to Serine/threonine-protein kinase 24 (EC 2.7.11.1);cDNA FLJ61159, highly similar to Serine/threonine-protein kinase 24 (EC 2.7.11.1);Serine/threonine kinase 24 (STE20 homolog, yeast);Serine/threonine kinase 24 (STE20 homolog, yeast), isoform CRA_c;cDNA FLJ61383, highly si…	2.1069e-14	0.56559	0.57975		1.1245	0.96992	0.93433			0.52035
AANVLLSEQGDVK	1342.71	IPI00911046	Serine/threonine-protein kinase 25;Sterile 20/oxidant stress-response kinase 1;Ste20-like kinase;cDNA FLJ75758, highly similar to Homo sapiens serine/threonine kinase 25 (STE20 homolog, yeast) (STK25), mRNA;Serine/threonine kinase 25 (STE20 homolog, yeast), isoform CRA_a;cDNA FLJ34842 fis, clone NT2NE2011033, highly similar to Serine/threonine-protein kinase 25 (EC 2.7.11.1);cDNA FLJ52778, highly…	2.1069e-14	0.90076	0.86752	0.66209	0.83716	2.7207		0.98058		1.2538
AANVTLLTSLVEGEAVHLAR	2063.14	IPI00009453	Transcription factor AP-2 alpha (Activating enhancer binding protein 2 alpha);Transcription factor AP-2 alpha (Activating enhancer binding protein 2 alpha), isoform CRA_c;Transcription factor AP-2 alpha;Activating enhancer-binding protein 2 alpha;AP-2 transcription factor;Activator protein 2;Transcription factor AP-2 alpha (Activating enhancer binding protein 2 alpha), isoform CRA_b;Transcription…	1.9054e-31			0.2259	0.23126					0.053033
AANYSSTSTR	1056.48	IPI00301280	Transmembrane protein 43;Protein LUMA	0.0020405		1.5458	0.71849				0.8256		0.45843
AAPAGGGGSAVSVLAPNGR	1607.84	IPI00065276	Tether containing UBX domain for GLUT4;Alveolar soft part sarcoma chromosomal region candidate gene 1 protein;Alveolar soft part sarcoma locus;Renal papillary cell carcinoma protein 17;UBX domain-containing protein 9	9.4284e-07	1.3439	1.3175		1.2828			3.609	3.0548
AAPAGGGGSAVSVLAPNGRR	1763.94	IPI00065276	Tether containing UBX domain for GLUT4;Alveolar soft part sarcoma chromosomal region candidate gene 1 protein;Alveolar soft part sarcoma locus;Renal papillary cell carcinoma protein 17;UBX domain-containing protein 9	0.022952	2.0044
AAPAPGLISVFSSSQELGAALAQLVAQR	2751.49	IPI00029997	6-phosphogluconolactonase	2.2366e-132	0.52183	0.56698	0.37333		0.61075	0.57561	0.85974	0.63603	0.53609
AAPAQQTTQPGGGK	1310.66	IPI00465054	Putative uncharacterized protein DKFZp686C1054;THUMP domain-containing protein 1;cDNA FLJ57359, highly similar to THUMP domain-containing protein 1;Putative uncharacterized protein 44M2.1	7.9709e-16							1.9137	1.7178
AAPASIPPFPVLEPVTSCK	1980.04	CON_00686450		8.4795e-86	0.13083	0.034623	0.067204	0.11182	0.034637	0.14917		0.0070257	0.13211
AAPCIYWLPLTDSQIVQK	2102.09	IPI00007334	Apoptotic chromatin condensation inducer in the nucleus;ACIN1 protein;Putative uncharacterized protein DKFZp667N107	2.3259e-05	0.7227		1.1124			1.0025	16.7	0.25809	1.4425
AAPDDPSGFAVLASCAR	1703.79	IPI00005914	Sedoheptulokinase;Carbohydrate kinase-like protein;cDNA FLJ31047 fis, clone HSYRA2000424, highly similar to Carbohydrate kinase-like protein (EC 2.7.1.-);cDNA FLJ52918, highly similar to Carbohydrate kinase-like protein (EC 2.7.1.-)	4.3964e-55		2.3498
AAPDILIATPGR	1193.68	IPI00293078	Probable ATP-dependent RNA helicase DDX27;DEAD box protein 27;DEAD box polypeptide 27;cDNA FLJ61659, highly similar to Probable ATP-dependent RNA helicase DDX27 (EC 3.6.1.-);DEAD (Asp-Glu-Ala-Asp) box polypeptide 27;DDX27 protein;DEAD (Asp-Glu-Ala-Asp) box polypeptide 27 variant	0.0004344				0.68527		0.76483	1.7938		1.3021
AAPDLGSHLDR	1150.57	IPI00152881	Protein Shroom3;Shroom-related protein;cDNA FLJ46841 fis, clone UTERU3000670, highly similar to Homo sapiens shroom (SHRM), mRNA;cDNA FLJ55531, highly similar to Homo sapiens shroom (SHRM), mRNA;cDNA FLJ42424 fis, clone BLADE2004089, moderately similar to Mus musculus PDZ domain actin binding protein Shroom mRNA	0.073406			0.091057						0.25692
AAPEASGTPSSDAVSR	1501.7	IPI00010133	Coronin-1A;Coronin-like protein p57;Coronin-like protein A;Tryptophan aspartate-containing coat protein;Coronin, actin binding protein, 1A, isoform CRA_a;cDNA, FLJ95572, Homo sapiens coronin, actin binding protein, 1A (CORO1A), mRNA	2.2979e-37	0.58774	1.1373	0.8335			1.6711			0.73524
AAPEASSPPASPLQHLLPGK	1967.05	IPI00647286	C9orf88 variant protein;Family with sequence similarity 129, member B;OC58;Chromosome 9 open reading frame 88, isoform CRA_c;Niban-like protein 1;Protein FAM129B;Meg-3;Chromosome 9 open reading frame 88, isoform CRA_a;CDNA: FLJ22151 fis, clone HRC00111;cDNA FLJ13518 fis, clone PLACE1005799;FAM129B protein	4.2311e-88	0.7576	0.92756		1.4819	1.349		0.5951	0.5222	0.30388
AAPEEPQQRPPEAVAAAPAGTTSSR	2488.23	IPI00477661	Zinc finger protein 91 homolog;Putative uncharacterized protein CNTF;cDNA FLJ57065, highly similar to Zinc finger protein 91	1.2144e-36					0.60475
AAPEERDLTQEQTEK	1743.83	IPI00172656	FAS-associated factor 2;UBX domain-containing protein 3B;UBX domain-containing protein 8;Protein ETEA;cDNA FLJ61076, highly similar to UBX domain-containing protein 8	2.8111e-35		1.8717			0.95849
AAPEGSGLGEDAR	1228.57	IPI00550364	Phosphoglucomutase-2;Glucose phosphomutase 2;cDNA FLJ54368, highly similar to Phosphoglucomutase-2 (EC 5.4.2.2);cDNA FLJ60384, highly similar to Phosphoglucomutase-2 (EC 5.4.2.2);Putative uncharacterized protein FLJ10983	3.6459e-34	0.57685			0.84016	0.49152
AAPEGSGLGEDARLDQETAQWLR	2469.19	IPI00550364	Phosphoglucomutase-2;Glucose phosphomutase 2;cDNA FLJ54368, highly similar to Phosphoglucomutase-2 (EC 5.4.2.2);cDNA FLJ60384, highly similar to Phosphoglucomutase-2 (EC 5.4.2.2);Putative uncharacterized protein FLJ10983	4.3735e-11			0.67978			0.5929	1.1436	0.92912
AAPEMVSLLK	1057.58	IPI00024317	Glutaryl-CoA dehydrogenase, mitochondrial;cDNA FLJ76015, highly similar to Homo sapiens glutaryl-Coenzyme A dehydrogenase (GCDH), nuclear gene encoding mitochondrial protein, transcript variant 1, mRNA;Glutaryl-Coenzyme A dehydrogenase, isoform CRA_a;cDNA FLJ59956, highly similar to Glutaryl-CoA dehydrogenase, mitochondrial (EC 1.3.99.7);cDNA FLJ59559, highly similar to Glutaryl-CoA dehydrogenase…	0.20429		3.4304		0.40447	0.67739		1.8639
AAPENPGGVLSVELPGLLAQLAR	2271.26	IPI00893476	Extended synaptotagmin-2;Chr2Syt;Protein FAM62B	5.1982e-21	0.53568
AAPEPLRPR	1005.57	IPI00942266	SLC9A3R2 protein;Na(+)/H(+) exchange regulatory cofactor NHE-RF2;Tyrosine kinase activator protein 1;SRY-interacting protein 1;Solute carrier family 9 isoform A3 regulatory factor 2;NHE3 kinase A regulatory protein E3KARP;Sodium-hydrogen exchanger regulatory factor 2	0.0048291	6.592	6.4322	3.734	1.2776	0.67867	0.66676		18.775
AAPFSLEYR	1052.53	IPI00015018	Inorganic pyrophosphatase;Pyrophosphate phospho-hydrolase;Pyrophosphatase (Inorganic) 1	0.023472	0.40683	0.55294	0.5972	0.57304	0.37862	0.39881	0.57531	0.55283	0.5594
AAPGAEFAPNK	1071.53	IPI00304596	Non-POU domain-containing octamer-binding protein;54 kDa nuclear RNA- and DNA-binding protein;p54(nrb);55 kDa nuclear protein;NMT55;DNA-binding p52/p100 complex, 52 kDa subunit;cDNA FLJ76817, highly similar to Homo sapiens non-POU domain containing, octamer-binding (NONO), mRNA;cDNA FLJ56109, highly similar to Non-POU domain-containing octamer-binding protein	0.00012968		0.64012	0.54986	1.1051	0.6168	0.94951	0.94691	1.3881	1.7664
AAPGAEFAPNKR	1227.64	IPI00304596	Non-POU domain-containing octamer-binding protein;54 kDa nuclear RNA- and DNA-binding protein;p54(nrb);55 kDa nuclear protein;NMT55;DNA-binding p52/p100 complex, 52 kDa subunit;cDNA FLJ76817, highly similar to Homo sapiens non-POU domain containing, octamer-binding (NONO), mRNA;cDNA FLJ56109, highly similar to Non-POU domain-containing octamer-binding protein	1			1.0474			0.74175	4.4281
AAPGAGDAAAGSGAEFAGGDGAAR	1973.88	IPI00013623	Long-chain fatty acid transport protein 3;Very long-chain acyl-CoA synthetase homolog 3;Solute carrier family 27 member 3	0	2.066	2.236		0.545
AAPGALLVMGVSGSGK	1413.77	IPI00418496	Probable gluconokinase;Gluconate kinase;Chromosome 9 open reading frame 103	3.4147e-11		2.5929
AAPGPALCLFDVDGTLTAPR	2041.03	IPI00006092	Phosphomannomutase 2;cDNA FLJ78512, highly similar to Homo sapiens phosphomannomutase 2 (PMM2), mRNA;Phosphomannomutase 2, isoform CRA_b;cDNA, FLJ92901, highly similar to Homo sapiens phosphomannomutase 2 (PMM2), mRNA;cDNA FLJ59907, highly similar to Phosphomannomutase 2 (EC 5.4.2.8);cDNA FLJ50559, highly similar to Phosphomannomutase 2 (EC 5.4.2.8);cDNA FLJ52163, highly similar to Phosphomannomu…	6.4487e-06						0.79699	0.60023	0.94753
AAPGQEPPEHMAELQR	1759.83	IPI00003590	Sulfhydryl oxidase 1;Quiescin Q6;cDNA FLJ78571, highly similar to Homo sapiens sulfhydryl oxidase mRNA;cDNA FLJ75458, highly similar to Homo sapiens sulfhydryl oxidase mRNA	1.0304e-21					0.058423	0.12494
AAPGYHMAK	944.454	IPI00004358	Glycogen phosphorylase, brain form;Phosphorylase;Glycogen phosphorylase, liver form	0.44132								0.18485	0.1536
AAPLAGFGYGLPISR	1488.81	IPI00915357	cDNA FLJ60191, highly similar to Pyruvate dehydrogenase (lipoamide) kinase isozyme 3 (EC 2.7.11.2);Pyruvate dehydrogenase kinase, isozyme 3, isoform CRA_a;[Pyruvate dehydrogenase [lipoamide]] kinase isozyme 3, mitochondrial;Pyruvate dehydrogenase kinase isoform 3	3.4511e-67		0.81792		3.1136			2.0413
AAPLDSIHSLAAYYIDCIR	2148.07	IPI00026781	Fatty acid synthase;[Acyl-carrier-protein] S-acetyltransferase;[Acyl-carrier-protein] S-malonyltransferase;3-oxoacyl-[acyl-carrier-protein] synthase;3-oxoacyl-[acyl-carrier-protein] reductase;3-hydroxypalmitoyl-[acyl-carrier-protein] dehydratase;Enoyl-[acyl-carrier-protein] reductase;Oleoyl-[acyl-carrier-protein] hydrolase;FASN protein	1.1939e-103	2.9108	3.3904	3.6213			0.71559	1.3615	1.3177	1.1481
AAPLLHTR	877.513	IPI00152960	RNA polymerase I-specific transcription initiation factor RRN3;Transcription initiation factor IA;RRN3 RNA polymerase I transcription factor homolog (S. cerevisiae);HCG1786665, isoform CRA_e;cDNA, FLJ95638, Homo sapiens RNA polymerase I transcription factor RRN3 (RRN3),mRNA;cDNA FLJ56083, highly similar to RNA polymerase I-specific transcriptioninitiation factor RRN3;cDNA FLJ50670, highly similar…	0.020806		1.1418		0.53057	0.20482		0.38856	0.44691
AAPMTPAARPEDYEAALNAALADVPELAR	2993.49	IPI00296635	1,4-alpha-glucan-branching enzyme;Glycogen-branching enzyme;Brancher enzyme;cDNA FLJ43930 fis, clone TESTI4013441, highly similar to 1,4-alpha-glucan branching enzyme (EC 2.4.1.18);cDNA FLJ57129, highly similar to 1,4-alpha-glucan branching enzyme (EC 2.4.1.18);cDNA FLJ59760, highly similar to 1,4-alpha-glucan branching enzyme (EC 2.4.1.18);Glucan , branching enzyme 1 variant	1.6414e-09								0.19689
AAPPEPGEPEERK	1405.68	IPI00103057	Protein FAM36A;cDNA FLJ10004 fis, clone HEMBA1000076, highly similar to Protein FAM36A;Family with sequence similarity 36, member A, isoform CRA_a;cDNA FLJ43269 fis, clone KIDNE2000665, highly similar to Protein FAM36A	0.0026564				0.93007	0.3764
AAPPGEYFSVGSQVSCR	1810.83	IPI00867714	Protein LSM12 homolog;cDNA FLJ51308	4.2308e-19		0.72209
AAPPPPPPPPPLESSPR	1702.9	IPI00746934	E3 ubiquitin-protein ligase UBR4;N-recognin-4;Zinc finger UBR1-type protein 1;Retinoblastoma-associated factor of 600 kDa;600 kDa retinoblastoma protein-associated factor;RBAF600;p600;Putative uncharacterized protein UBR4	0.0032877	0.48798
AAPQDVHVR	991.52	IPI00215704	Vesicle transport protein SEC20;BCL2/adenovirus E1B 19 kDa protein-interacting protein 1;Transformation-related gene 8 protein	0.0048291	2.8466	3.209	3.1794		1.4822	1.1978	2.8536	0.78917	2.5068
AAPRPAPVAQPPAAAPPSAVGSSAAAPR	2532.36	IPI00007673	Coiled-coil-helix-coiled-coil-helix domain-containing protein 2, mitochondrial;HCV NS2 trans-regulated protein;Aging-associated gene 10 protein;Coiled-coil-helix-coiled-coil-helix domain-containing protein 9, mitochondrial	9.594e-31		0.085288
AAPSAGSWSTFQHK	1473.7	IPI00291570	Caspase-2;ICH-1 protease;Neural precursor cell expressed developmentally down-regulated protein 2;Caspase-2 subunit p18;Caspase-2 subunit p13;Caspase-2 subunit p12;cDNA FLJ77287, highly similar to Homo sapiens caspase 2, apoptosis-related cysteine peptidase (neural cell expressed, developmentally down-regulated 2) (CASP2), transcript variant 1, mRNA;HCG20684, isoform CRA_c;cDNA FLJ59132, highly s…	0.00071338	0.93396	0.56064	0.77425	1.4145	1.5818		1.0899	1.3554
AAPSDGFKPR	1044.54	IPI00025347	Probable ribosome biogenesis protein NEP1;Nucleolar protein EMG1 homolog;Protein C2f;cDNA FLJ76620, highly similar to Homo sapiens C2f protein (C2F), mRNA;cDNA FLJ60792, highly similar to Probable ribosome biogenesis protein NEP1;cDNA FLJ56921, highly similar to Probable ribosome biogenesis protein NEP1;EMG1 nucleolar protein homolog (S. cerevisiae), isoform CRA_a	7.4243e-33	0.93281	3.7261	1.5158	1.5723		1.3202	2.6125	6.643	1.4865
AAPSGGVNCEEFAEFQELLK	2195.02	IPI00046828	Coiled-coil domain-containing protein 58	5.1173e-13						1.9272
AAPSLLNWR	1026.56	IPI00002469	Host cell factor 2;C2 factor;Host cell factor C2, isoform CRA_b;cDNA, FLJ94012, Homo sapiens host cell factor 2 (HCF-2), mRNA;cDNA FLJ58092, highly similar to Host cell factor 2;Putative uncharacterized protein HCFC2;Host cell factor C2 variant;HCFC2 protein;Host cell factor C2, isoform CRA_a	0.1114			3.0559						2.1237
AAPSPSGGGGSGGGSGSGTPGPVGSPAPGHPAVSSMQGK	3242.5	IPI00942214	Dual specificity mitogen-activated protein kinase kinase 4;JNK-activating kinase 1;c-Jun N-terminal kinase kinase 1;SAPK/ERK kinase 1;cDNA FLJ52538, highly similar to Dual specificity mitogen-activated proteinkinase kinase 4 (EC 2.7.12.2);cDNA, FLJ78999, highly similar to Dual specificity mitogen-activated protein kinase kinase 4 (EC 2.7.12.2);cDNA, FLJ79076, highly similar to Dual specificity mi…	9.7666e-65	0.88879	1.0323		0.88877			0.37639
AAPSTAPAEATPPKPGEAEAPPK	2184.11	IPI00641582	BAG family molecular chaperone regulator 3;Bcl-2-associated athanogene 3;Bcl-2-binding protein Bis;Docking protein CAIR-1;BCL2-associated athanogene 3 variant	2.9372e-06	1.7192	2.2866		0.34142	2.6465		0.75072	0.92375	0.53905
AAPTAASDQPDSAATTEK	1730.8	IPI00305092	Partner of Y14 and mago;Protein wibg homolog	3.2302e-77		1.8966	1.5154			0.71235		1.7555	0.83438
AAPVDLELK	954.539	IPI00000051	Prefoldin subunit 1;Prefoldin subunit 1, isoform CRA_b;cDNA, FLJ96398, Homo sapiens prefoldin 1 (PFDN1), mRNA	0.00013843	1.0019	1.0469	0.77058	1.4314	1.1841	0.68557	0.98349	1.3851
AAPVDLELKK	1082.63	IPI00000051	Prefoldin subunit 1;Prefoldin subunit 1, isoform CRA_b;cDNA, FLJ96398, Homo sapiens prefoldin 1 (PFDN1), mRNA	0.012569	0.79396	1.3397	0.82236		0.84034	0.9692	1.5327	2.0903	0.88952
AAPVLLR	738.475	IPI00166079	Vitamin K epoxide reductase complex subunit 1-like protein 1;cDNA FLJ76587, highly similar to Homo sapiens vitamin K epoxide reductase complex, subunit 1-like 1 (VKORC1L1), mRNA;cDNA FLJ50107, highly similar to Mus musculus vitamin K epoxide reductase complex, subunit 1-like 1, transcript variant 2, mRNA	0.26392	1.5555	2.1157	1.6877	0.76769			2.5731		1.3364
AAPVVAPPGVVVSR	1317.78	IPI00011898	Translation initiation factor eIF-2B subunit epsilon;eIF-2B GDP-GTP exchange factor subunit epsilon;cDNA FLJ34327 fis, clone FEBRA2009022, highly similar to TRANSLATION INITIATION FACTOR EIF-2B EPSILON SUBUNIT;Eukaryotic translation initiation factor 2B, subunit 5 epsilon, 82kDa, isoform CRA_b;Eukaryotic translation initiation factor 2B, subunit 5 epsilon, 82kDa variant	0.00071338	0.96288	1.2979	0.73305	0.61943	0.61954		1.1413	0.83114	0.65399
AAQALALLR	925.571	IPI00002134	26S proteasome non-ATPase regulatory subunit 5;26S proteasome subunit S5B;26S protease subunit S5 basic;cDNA FLJ76282, highly similar to Homo sapiens proteasome (prosome, macropain) 26S subunit, non-ATPase, 5 (PSMD5), mRNA;cDNA FLJ52877, highly similar to 26S proteasome non-ATPase regulatory subunit 5	1.2401e-13	1.1863	1.3235	1.0682	0.73884	0.6908	0.66946	1.8118	1.752	1.223
AAQAPSSFQLLYDLK	1650.86	IPI00218342	C-1-tetrahydrofolate synthase, cytoplasmic;Methylenetetrahydrofolate dehydrogenase;Methenyltetrahydrofolate cyclohydrolase;Formyltetrahydrofolate synthetase;Methylenetetrahydrofolate dehydrogenase (NADP+ dependent) 1, methenyltetrahydrofolate cyclohydrolase, formyltetrahydrofolate synthetase, isoform CRA_a;cDNA, FLJ92681, Homo sapiens methylenetetrahydrofolate dehydrogenase (NADP+dependent), meth…	3.0583e-89	1.7731	1.6087	1.6989	2.1086	3.6598	2.5756	2.8584	2.6113	2.7162
AAQAPSSFQLLYDLKLPVEDK	2332.23	IPI00218342	C-1-tetrahydrofolate synthase, cytoplasmic;Methylenetetrahydrofolate dehydrogenase;Methenyltetrahydrofolate cyclohydrolase;Formyltetrahydrofolate synthetase;Methylenetetrahydrofolate dehydrogenase (NADP+ dependent) 1, methenyltetrahydrofolate cyclohydrolase, formyltetrahydrofolate synthetase, isoform CRA_a;cDNA, FLJ92681, Homo sapiens methylenetetrahydrofolate dehydrogenase (NADP+dependent), meth…	0.091384		2.5399
AAQASDLEK	931.461	IPI00744692	Transaldolase;cDNA FLJ57988, highly similar to Transaldolase (EC 2.2.1.2);Transaldolase 1, isoform CRA_c	0.011466		1.21	0.81716			0.62613			1.5067
AAQASDLEKIHLDEK	1666.85	IPI00744692	Transaldolase;cDNA FLJ57988, highly similar to Transaldolase (EC 2.2.1.2);Transaldolase 1, isoform CRA_c	0.050688						0.7288
AAQDFFSTCR	1201.52	IPI00301489	Uroporphyrinogen decarboxylase;cDNA FLJ59203, moderately similar to Uroporphyrinogen decarboxylase (EC 4.1.1.37);cDNA FLJ50456, highly similar to Uroporphyrinogen decarboxylase (EC 4.1.1.37)	0.00029384			0.87482			0.83074	1.0804	0.38832	0.31726
AAQDLCEEALR	1274.59	IPI00305068	Pre-mRNA-processing factor 6;U5 snRNP-associated 102 kDa protein;PRP6 homolog;cDNA, FLJ95067;cDNA FLJ10692 fis, clone NT2RP3000361, highly similar to Pre-mRNA-processing factor 6 homolog	5.4093e-10		0.7424	1.1615					2.3982	1.5859
AAQDRDQIYR	1234.61	IPI00555647	Splicing factor, arginine/serine-rich 10 (Transformer 2 homolog, Drosophila) variant;Transformer-2 protein homolog beta;Transformer-2 protein homolog B;Splicing factor, arginine/serine-rich 10;cDNA, FLJ96718, highly similar to Homo sapiens splicing factor, arginine/serine-rich 10 (transformer 2 homolog, Drosophila) (SFRS10), mRNA;Putative uncharacterized protein DKFZp686F18120;cDNA FLJ40872 fis, …	1			1.0574	1.5475				1.6689	1.2941
AAQEEYVK	936.455	IPI00796333	Fructose-bisphosphate aldolase A;Muscle-type aldolase;Lung cancer antigen NY-LU-1;Fructose-bisphosphate aldolase	1.205e-09	1.7069	2.12		0.9359	0.57148	0.5095	0.99998
AAQEEYVKR	1092.56	IPI00796333	Fructose-bisphosphate aldolase A;Muscle-type aldolase;Lung cancer antigen NY-LU-1;Fructose-bisphosphate aldolase	0.034855			2.0581			0.60691	0.97587		0.83395
AAQELQEGQR	1128.55	IPI00219352	Cystathionine beta-synthase;Serine sulfhydrase;Beta-thionase;Cystathionine-beta-synthase, isoform CRA_b;cDNA, FLJ94281, Homo sapiens cystathionine-beta-synthase (CBS), mRNA;cDNA FLJ53863, highly similar to Cystathionine beta-synthase (EC 4.2.1.22);cDNA FLJ53928, highly similar to Cystathionine beta-synthase (EC 4.2.1.22);Putative uncharacterized protein;Putative uncharacterized protein DKFZp727E0…	1.0307e-05		1.5573	0.92442			1.1163			7.7283
AAQEQVLNASR	1185.61	IPI00830108	DnaJ homolog subfamily C member 2;Zuotin-related factor 1;M-phase phosphoprotein 11;DNAJC2 protein	5.4093e-10			1.9023	1.0856			2.3602	2.7054	2.2168
AAQFVDLLGYFSLK	1570.84	IPI00746934	E3 ubiquitin-protein ligase UBR4;N-recognin-4;Zinc finger UBR1-type protein 1;Retinoblastoma-associated factor of 600 kDa;600 kDa retinoblastoma protein-associated factor;RBAF600;p600;Putative uncharacterized protein UBR4	3.6842e-34	0.84406	1.3084					0.96878	0.64321
AAQGEPQVQFK	1201.61	IPI00792352	Putative uncharacterized protein RAN;RAN, member RAS oncogene family, isoform CRA_c;GTP-binding nuclear protein Ran;GTPase Ran;Ras-related nuclear protein;Ras-like protein TC4;Androgen receptor-associated protein 24;RAN, member RAS oncogene family, isoform CRA_b;cDNA FLJ78394, highly similar to Homo sapiens RAN, member RAS oncogene family (RAN), mRNA;cDNA, FLJ92821, Homo sapiens RAN, member RAS o…	5.4093e-10	0.6189	0.8072		1.1908	1.2043	1.0081	1.2731	1.0536	1.2125
AAQGPPAPAVPPNTDVMACTQTALLQK	2746.38	IPI00028412	Sjoegren syndrome/scleroderma autoantigen 1;Autoantigen p27	0.023813				0.6749
AAQIELLQLLVQIAAENNLGEGVIVK	2745.56	IPI00016910	Eukaryotic translation initiation factor 3 subunit C;Eukaryotic translation initiation factor 3 subunit 8;eIF3 p110;Cell migration-inducing protein 17;cDNA FLJ30804 fis, clone FEBRA2001267, highly similar to Eukaryotic translation initiation factor 3 subunit 8;cDNA FLJ55450, highly similar to Eukaryotic translation initiation factor 3 subunit 8;cDNA FLJ54400, highly similar to Eukaryotic translat…	1							0.80373
AAQIFITELTLR	1374.79	IPI00071697	Nuclear transcription factor Y subunit gamma;Nuclear transcription factor Y subunit C;CAAT-box DNA-binding protein subunit C;Transactivator HSM-1/2;Putative uncharacterized protein DKFZp667G242;Nuclear transcription factor Y, gamma;cDNA FLJ58328, highly similar to Nuclear transcription factor Y subunit gamma;Nuclear transcription factor Y, gamma, isoform CRA_d;cDNA FLJ45775 fis, clone NETRP200401…	8.1906e-14			1.6349			0.8509
AAQIGAHTLSGACLDPGAFK	1983.98	IPI00032875	Electron transfer flavoprotein-ubiquinone oxidoreductase, mitochondrial;Electron-transferring-flavoprotein dehydrogenase;Mutant electron-transferring flavoprotein dehydrogenase;cDNA FLJ59482, highly similar to Electron transfer flavoprotein-ubiquinone oxidoreductase, mitochondrial (EC 1.5.5.1);cDNA FLJ52419, highly similar to Electron transfer flavoprotein-ubiquinone oxidoreductase, mitochondrial…	2.8218e-09	3.5575				0.22617
AAQIPESDQIK	1198.62	IPI00001541	Mitochondrial import inner membrane translocase subunit Tim9;Translocase of inner mitochondrial membrane 9 homolog (Yeast), isoform CRA_a;cDNA, FLJ92376, Homo sapiens translocase of inner mitochondrial membrane 9 homolog(yeast) (TIMM9), mRNA	0.0047897	5.7906
AAQIPESDQIKQFKEFLGTYNK	2554.31	IPI00001541	Mitochondrial import inner membrane translocase subunit Tim9;Translocase of inner mitochondrial membrane 9 homolog (Yeast), isoform CRA_a;cDNA, FLJ92376, Homo sapiens translocase of inner mitochondrial membrane 9 homolog(yeast) (TIMM9), mRNA	0.075413						0.66895
AAQIPIVATTSTPGIVR	1693.97	IPI00855954	cDNA FLJ58388;INO80 complex subunit C	8.6096e-08	0.44059
AAQIPSPLER	1080.59	IPI00167053	Oxysterol-binding protein-related protein 3;Oxysterol-binding protein;HCG38836, isoform CRA_b;Oxysterol binding protein-like 3;HCG38836, isoform CRA_c;Putative uncharacterized protein OSBPL3	0.051346									0.25115
AAQLATEIADIK	1242.68	IPI00329536	Early endosome antigen 1;Endosome-associated protein p162;Zinc finger FYVE domain-containing protein 2;cDNA FLJ75535, highly similar to Homo sapiens early endosome antigen 1, 162kD (EEA1), mRNA;EEA1 protein	8.1906e-14		1.1559							0.39729
AAQLCGAGMAAVVDK	1460.71	IPI00903226	cDNA FLJ46359 fis, clone TESTI4049786, highly similar to Hexokinase-1 (EC 2.7.1.1);Hexokinase-1;Hexokinase type I;Brain form hexokinase;cDNA FLJ78173, highly similar to Homo sapiens hexokinase 1 (HK1) mRNA;Hexokinase 1;Hexokinase 1 isoform HKI variant;cDNA FLJ56506, highly similar to Hexokinase-1 (EC 2.7.1.1);Hexokinase;cDNA FLJ33948 fis, clone CTONG2018379, highly similar to Hexokinase-1 (EC 2.7…	5.0621e-54	1.5885	1.2086		0.52053	0.19143		0.63198		0.5896
AAQLIGTCSQNVAAIQEQVLGLGALR	2680.43	IPI00100748	Hsp70-binding protein 1;Heat shock protein-binding protein 1;cDNA FLJ55382, highly similar to Hsp70-binding protein 1	5.6086e-35			0.43289						1.1956
AAQLIGTCSQNVAAIQEQVLGLGALRK	2808.53	IPI00100748	Hsp70-binding protein 1;Heat shock protein-binding protein 1;cDNA FLJ55382, highly similar to Hsp70-binding protein 1	6.0935e-05								0.67563
AAQLQLPQLPLAALQALGEAASCQLLAR	2914.61	IPI00012433	Factor VIII intron 22 protein;CpG island protein	1.4462e-22							1.0677	0.94301
AAQLVDKDSTFLSTLEHHLSR	2367.22	IPI00470649	Nicalin;Nicastrin-like protein;cDNA, FLJ94705, highly similar to Homo sapiens nicalin (LOC56926), mRNA	1.4216e-13			1.5207			0.41707			0.6491
AAQQQEEQEEKEEEDDEQTLHR	2698.16	IPI00019148	Immunoglobulin-binding protein 1;CD79a-binding protein 1;B-cell signal transduction molecule alpha 4;Renal carcinoma antigen NY-REN-16	0.0020632	0.49005
AAQSALAAIFNLHLDQTPSR	2123.11	IPI00020368	Double-stranded RNA-specific editase 1;dsRNA adenosine deaminase;RNA-editing deaminase 1;RNA-editing enzyme 1;Adenosine deaminase, RNA-specific, B1 (RED1 homolog rat);Adenosine deaminase ADAR2 variant;RNA editing deaminase 1;Adenosine deaminase acting on RNA type2d	2.5565e-05									0.23284
AAQTAEDAMQIMEQMTK	1895.84	IPI00013455	CLIP1 protein;Cytoplasmic linker protein CLIP-170;CAP-Gly domain-containing linker protein 1;Restin;Cytoplasmic linker protein 170 alpha-2;Reed-Sternberg intermediate filament-associated protein;Cytoplasmic linker protein 1;CAP-GLY domain containing linker protein 1	2.4685e-31					0.84348			0.93194
AAQTTIETAIHSLIETLK	1939.06	IPI00739940	Protein furry homolog-like;ALL1-fused gene from chromosome 4p12;cDNA FLJ45375 fis, clone BRHIP3019824;Putative uncharacterized protein DKFZp781A0295;Furry homolog-like protein.;cDNA FLJ46595 fis, clone THYMU3045704	3.3526e-07		0.82808	0.71848			0.8921	0.40104		0.041819
AAQVAQDEEIAR	1299.64	IPI00217059	Coiled-coil domain-containing protein 50;Protein Ymer	7.1533e-10
AAQVGLLFLK	1058.65	IPI00306207	Uncharacterized protein C8orf41	0.02484		0.97628					1.0306	0.89102
AAQVTIQSSGTFSTK	1524.78	CON_00729194		1.3204e-24		0.051716
AAQYACSLLGHALQR	1657.84	IPI00021978	Peroxisomal membrane protein 11B;Peroxin-11B;Peroxisomal biogenesis factor 11B;PEX11beta;Pex11pbeta;cDNA FLJ13929 fis, clone Y79AA1000734, highly similar to Peroxisomal membrane protein 11B;Peroxisomal biogenesis factor 11B, isoform CRA_a;cDNA FLJ55939, highly similar to Peroxisomal membrane protein 11B	3.4511e-67	1.9628	0.27759	1.4292		0.32453	0.26446	1.6143	0.91088	0.74285
AAQYQVNQAAAAQAAATAAAMGIPQAVLPPLPK	3201.7	IPI00395357	MBNL protein;Muscleblind 41kD isoform;Muscleblind-like (Drosophila);Muscleblind-like (Drosophila), isoform CRA_a;Muscleblind-like protein 1;Triplet-expansion RNA-binding protein;Muscleblind-like protein EXP41s;Putative uncharacterized protein DKFZp686P06174;36 kDa muscleblind protein EXP36;cDNA FLJ50804, highly similar to Homo sapiens muscleblind-like (MBNL1), transcript variant 4, mRNA	2.4227e-28	0.75865						1.1817
AAQYQVNQAAAAQAAATAAAMTQSAVK	2605.29	IPI00021692	Muscleblind-like protein 1;Triplet-expansion RNA-binding protein;cDNA FLJ53594, highly similar to Muscleblind-like protein;MBNL1 protein;Muscleblind-like (Drosophila), isoform CRA_f	3.191e-51	0.69738	0.80716		1.8556	3.3899		1.3687	1.5499
AARAEAAVESAVAGPQGR	1709.88	IPI00005914	Sedoheptulokinase;Carbohydrate kinase-like protein;cDNA FLJ31047 fis, clone HSYRA2000424, highly similar to Carbohydrate kinase-like protein (EC 2.7.1.-);cDNA FLJ52918, highly similar to Carbohydrate kinase-like protein (EC 2.7.1.-)	1	0.40127
AAREAEALTQR	1214.64	IPI00926581	MYH14 variant protein;Myosin-14;Myosin heavy chain 14;Myosin heavy chain, non-muscle IIc;Non-muscle myosin heavy chain IIc;Nonmuscle myosin heavy chain II-C variant;MYH14 protein;cDNA FLJ43092 fis, clone COLON2002520, highly similar to Myosin-14;cDNA FLJ56368, highly similar to Myosin-14;Myosin	1			0.48803			0.46988
AAREELLAEFGSGTLDLPALTR	2329.23	IPI00010951	Epiplakin;450 kDa epidermal antigen;Putative uncharacterized protein DKFZp434G0719	8.8306e-06			0.89397		0.27353
AAREELLAEFGSGTLDLPALTRR	2485.33	IPI00010951	Epiplakin;450 kDa epidermal antigen;Putative uncharacterized protein DKFZp434G0719	2.9372e-06		1.7121
AARPITLGIDLGTTSVK	1711.98	IPI00005914	Sedoheptulokinase;Carbohydrate kinase-like protein;cDNA FLJ31047 fis, clone HSYRA2000424, highly similar to Carbohydrate kinase-like protein (EC 2.7.1.-);cDNA FLJ52918, highly similar to Carbohydrate kinase-like protein (EC 2.7.1.-)	3.0897e-42	2.4492	3.1228	2.0337	1.8866	1.9628	1.6154	2.5211	2.9317	1.5732
AASAAAASAAAASAASGSPGPGEGSAGGEK	2386.1	IPI00438229	Transcription intermediary factor 1-beta;Tripartite motif-containing protein 28;Nuclear corepressor KAP-1;KRAB-associated protein 1;KRAB-interacting protein 1;RING finger protein 96;cDNA, FLJ94025, highly similar to Homo sapiens tripartite motif-containing 28 (TRIM28), mRNA	3.1563e-251	0.94992	1.239		2.3811	2.8305	2.1223		4.3287
AASAAAASAAAASAASGSPGPGEGSAGGEKR	2542.2	IPI00438229	Transcription intermediary factor 1-beta;Tripartite motif-containing protein 28;Nuclear corepressor KAP-1;KRAB-associated protein 1;KRAB-interacting protein 1;RING finger protein 96;cDNA, FLJ94025, highly similar to Homo sapiens tripartite motif-containing 28 (TRIM28), mRNA	1.2961e-149			1.0017			2.0802
AASAAFQENVGR	1219.59	IPI00030774	Tubulin-specific chaperone D;Tubulin-folding cofactor D;Beta-tubulin cofactor D;SSD-1;cDNA FLJ61213, highly similar to Tubulin-specific chaperone D;Putative uncharacterized protein TBCD	1.9337e-34	0.28071	0.78392	0.3606	0.92588	0.64415	0.87009	1.2486		0.829
AASAAGAAGSAGGSSGAAGAAGGGAGAGTRPGDGGTASAGAAGPGAATK	3668.71	IPI00014197	Protein CDV3 homolog	1.0033e-105	0.63758	0.74503		2.1246
AASAAREELK	1044.56	IPI00009771	Lamin-B2	0.6481			1.2663			1.183			0.89071
AASAATAAPTATPAAQESGTIPK	2082.06	IPI00010349	Alkyldihydroxyacetonephosphate synthase, peroxisomal;Alkylglycerone-phosphate synthase;Aging-associated gene 5 protein;Alkylglycerone phosphate synthase;cDNA, FLJ95006, Homo sapiens alkylglycerone phosphate synthase (AGPS), mRNA;cDNA FLJ51873, highly similar to Alkyldihydroxyacetonephosphate synthase, peroxisomal (EC 2.5.1.26);cDNA, FLJ79139, highly similar to Alkyldihydroxyacetonephosphate synth…	2.3738e-41	0.17738	0.038142
AASADSTTEGTPADGFTVLSTK	2126	IPI00304171	Core histone macro-H2A.1;H2A.y;H2A/y;Medulloblastoma antigen MU-MB-50.205	1.0361e-109			1.4691	0.15565		0.25315			0.72719
AASAFFTYVSLSQEGR	1732.84	IPI00010415	Cytosolic acyl coenzyme A thioester hydrolase;Long chain acyl-CoA thioester hydrolase;Acyl-CoA thioesterase 7;CTE-IIa;Brain acyl-CoA hydrolase;cDNA FLJ76231, highly similar to Homo sapiens brain acyl-CoA hydrolase (BACH), transcript varianthBACHb, mRNA;Acyl-CoA thioesterase 7, isoform CRA_b;cDNA FLJ32606 fis, clone STOMA1000186, highly similar to Homo sapiens acyl-CoA thioesterase 7 (ACOT7), tran…	5.1655e-27	0.52984	0.58313	0.43829		2.6457		0.43168	0.34865	0.28812
AASAGQEPLHNEELAGAGR	1876.9	IPI00028387	DDRGK domain-containing protein 1	4.6123e-29	1.1931			0.43726	0.14063
AASAGVPYHGEVPVSLAR	1779.93	IPI00012645	Spectrin beta chain, brain 2;Spectrin, non-erythroid beta chain 2;Beta-III spectrin;SPTBN2 protein	5.8284e-44	3.2104	3.0291	2.3356	1.2597	1.1029	0.93802	1.3046	4.5233
AASAPYFEVLEK	1323.67	IPI00922855	TUBGCP2 protein;Gamma-tubulin complex component 2;Spindle pole body protein Spc97 homolog;cDNA FLJ34794 fis, clone NT2NE2005676, highly similar to Gamma-tubulin complex component 2;cDNA FLJ58511, highly similar to Gamma-tubulin complex component 2;cDNA FLJ58259, highly similar to Gamma-tubulin complex component 2;Tubulin, gamma complex associated protein 2 variant;Tubulin, gamma complex associate…	0.001007						0.82714
AASASESALQTVIK	1374.74	IPI00377045	Laminin alpha-3 chain variant 1;Alpha3A;Laminin alpha-3 chain variant 2;Laminin subunit alpha-3;Epiligrin 170 kDa subunit;Nicein subunit alpha;Laminin alpha 3b chain;Laminin alpha 3b chain variant;Laminin alpha 3 splice variant a;LAMA3 protein;Epiligrin alpha 3 subunit;Laminin alpha 3 splice variant b2	2.7189e-12							0.00485	0.007618	0.047041
AASASESALQTVIKEDLPR	1985.04	IPI00377045	Laminin alpha-3 chain variant 1;Alpha3A;Laminin alpha-3 chain variant 2;Laminin subunit alpha-3;Epiligrin 170 kDa subunit;Nicein subunit alpha;Laminin alpha 3b chain;Laminin alpha 3b chain variant;Laminin alpha 3 splice variant a;LAMA3 protein;Epiligrin alpha 3 subunit;Laminin alpha 3 splice variant b2	5.495e-05									0.089969
AASAYAVGDVK	1050.53	IPI00219774	cAMP-dependent protein kinase type II-alpha regulatory subunit;cDNA FLJ75444, highly similar to Homo sapiens protein kinase, cAMP-dependent, regulatory, type II, alpha (PRKAR2A), mRNA;PRKAR2A protein;Protein kinase, cAMP-dependent, regulatory, type II, alpha;Protein kinase, cAMP-dependent, regulatory, type II, alpha, isoform CRA_b	0.0047897			1.0551			0.77821			0.55687
AASCVLLHTGQK	1283.67	IPI00220271	Alcohol dehydrogenase [NADP+];Aldehyde reductase;Aldo-keto reductase family 1 member A1;cDNA FLJ76066, highly similar to Homo sapiens aldo-keto reductase family 1, member A1 (aldehyde reductase) (AKR1A1), transcript variant 1, mRNA;AKR1A1 protein;Aldo-keto reductase family 1, member A1 (Aldehyde reductase);Aldo-keto reductase family 1, member A1 (Aldehyde reductase), isoform CRA_a	9.622e-20	0.35982	0.63994	0.30751	0.1311	0.15772	0.10401	0.48938	0.33539	0.24024
AASDELSK	819.397	IPI00307162	Vinculin;Metavinculin;cDNA FLJ59659, highly similar to Vinculin;cDNA FLJ45031 fis, clone BRAWH3018548, highly similar to Vinculin;cDNA FLJ55698, highly similar to Vinculin	0.67248		0.27592							0.15511
AASDIAMTELPPTHPIR	1818.93	IPI00000816	14-3-3 protein epsilon;cDNA, FLJ79100, highly similar to 14-3-3 protein epsilon (14-3-3E);14-3-3 protein epsilon isoform transcript variant 1;cDNA FLJ51851, highly similar to 14-3-3 protein epsilon (14-3-3E);cDNA, FLJ79084, highly similar to 14-3-3 protein epsilon (14-3-3E)	3.0897e-42	0.6748	0.59138	0.51959	1.5019	1.817	1.3494	0.78457	0.81463	0.51195
AASGFNAMEDAQTLR	1580.73	IPI00793199	Proliferation-inducing protein 28;ANXA4 protein;Annexin A4;Putative uncharacterized protein ANXA4;cDNA, FLJ96576, Homo sapiens annexin A4 (ANXA4), mRNA;Annexin-4;Annexin IV;Lipocortin IV;Endonexin I;Chromobindin-4;Protein II;P32.5;Placental anticoagulant protein II;PP4-X;35-beta calcimedin;Carbohydrate-binding protein p33/p41;cDNA FLJ52218, highly similar to Annexin A4;cDNA FLJ51794, highly simil…	6.4616e-42	0.58697		0.42839		0.61011				0.28504
AASGFNAMEDAQTLRK	1708.82	IPI00793199	Proliferation-inducing protein 28;ANXA4 protein;Annexin A4;Putative uncharacterized protein ANXA4;cDNA, FLJ96576, Homo sapiens annexin A4 (ANXA4), mRNA;Annexin-4;Annexin IV;Lipocortin IV;Endonexin I;Chromobindin-4;Protein II;P32.5;Placental anticoagulant protein II;PP4-X;35-beta calcimedin;Carbohydrate-binding protein p33/p41;cDNA FLJ52218, highly similar to Annexin A4;cDNA FLJ51794, highly simil…	2.2979e-37	0.48932	0.6133	0.49772	1.2792	1.2862	1.249	0.56857	0.22885	0.36754
AASGLDHLK	910.487	IPI00304885	Centromere protein C 1;Centromere autoantigen C;Interphase centromere complex protein 7;CENPC1 protein;Centromere protein C 1, isoform CRA_a	0.00013843			0.71566						2.542
AASGYPVKVPLEVQEADEAK	2100.07	IPI00893918	Valyl-tRNA synthetase;Valine--tRNA ligase;Protein G7a;Valyl-tRNA synthetase, isoform CRA_a;cDNA FLJ54383, highly similar to Valyl-tRNA synthetase (EC 6.1.1.9)	4.6708e-09									0.5977
AASIFGGAKPVDTAAR	1530.82	IPI00942600	Eukaryotic translation initiation factor 4B;cDNA FLJ54492, highly similar to Eukaryotic translation initiation factor 4B;cDNA FLJ59206, highly similar to Eukaryotic translation initiation factor 4B;cDNA FLJ59405, highly similar to Eukaryotic translation initiation factor 4B;EIF4B protein;cDNA FLJ59402, highly similar to Eukaryotic translation initiation factor 4B	0.0013022		1.7566	2.2607	2.7191	1.5045	2.9797	1.8893		2.6252
AASITSEVFNK	1165.6	IPI00026970	FACT complex subunit SPT16;Facilitates chromatin transcription complex subunit SPT16;FACT 140 kDa subunit;FACTp140;Chromatin-specific transcription elongation factor 140 kDa subunit;SUPT16H protein	3.8404e-06			1.2122	1.0447	0.73204	1.2286	1.1019	1.3427	2.652
AASKPVEAAVVAAAVPSSGSGVGGGGTAGPGTGGLPR	3116.62	IPI00015602	Mitochondrial import receptor subunit TOM70;Mitochondrial precursor proteins import receptor;Translocase of outer membrane 70 kDa subunit;cDNA FLJ90621 fis, clone PLACE1002547, highly similar to Mitochondrial proteins import receptor;cDNA FLJ57240, highly similar to Mitochondrial proteins import receptor	4.1199e-31	1.3079	1.457		0.37452	0.23695
AASLELSEVKK	1173.66	IPI00305267	Golgin subfamily A member 3;Golgin-160;Golgi complex-associated protein of 170 kDa;GOLGA3 protein	0.073406			0.32055						0.50992
AASLEYDYETIR	1429.67	IPI00657706	Lysophospholipid acyltransferase 7;1-acylglycerophosphatidylinositol O-acyltransferase;Lysophosphatidylinositol acyltransferase;Leukocyte receptor cluster member 4;Bladder and breast carcinoma-overexpressed gene 1 protein;Membrane-bound O-acyltransferase domain-containing protein 7;cDNA FLJ55184, highly similar to Homo sapiens leukocyte receptor cluster (LRC) member 4 (LENG4), mRNA;Putative uncha…	8.1906e-14	0.58325	0.62811	0.31553		0.25201	0.32802	0.59199		0.37506
AASLHWTSER	1156.56	IPI00297325	Succinate dehydrogenase [ubiquinone] cytochrome b small subunit, mitochondrial;Succinate-ubiquinone reductase membrane anchor subunit;QPs3;CII-4;Succinate dehydrogenase complex subunit D;Succinate-ubiquinone oxidoreductase cytochrome b small subunit;AVLL5809	7.6147e-07			1.2035			0.42334	1.2886		0.7172
AASLLLEILGLLCK	1512.89	IPI00927510	Eukaryotic translation initiation factor 4 gamma 1;p220;cDNA FLJ56483, highly similar to Eukaryotic translation initiation factor 4 gamma 1	1.8407e-21		2.6375					2.041	1.1662
AASLTCASGLR	1105.56	IPI00915008		0.018937								0.85628
AASLTEDRDR	1132.55	IPI00927510	Eukaryotic translation initiation factor 4 gamma 1;p220;cDNA FLJ56483, highly similar to Eukaryotic translation initiation factor 4 gamma 1	1			1.8706			3.4204			2.3691
AASMDPPRATEPVATSNPAGDPVGSTR	2651.26	IPI00895800	Putative uncharacterized protein INF2;Inverted formin-2;HBEBP2-binding protein C	1.8265e-07	0.67342	1.0235
AASNCGIVESILNWVK	1759.89	IPI00027280	DNA topoisomerase 2-beta;DNA topoisomerase II, beta isozyme;Topoisomerase IIb;DNA topoisomerase 2;cDNA FLJ50986, highly similar to DNA topoisomerase 2-beta (EC 5.99.1.3);cDNA, FLJ79391, highly similar to DNA topoisomerase 2-beta (EC 5.99.1.3);DNA topoisomerase II, beta isozyme variant;Antigen MLAA-44;Putative uncharacterized protein;DNA topoisomerase II beta;Topoisomerase II beta	0.0083964			0.87855			1.1394
AASNIIFSNGNLDPWAGGGIR	2129.07	IPI00296141	Dipeptidyl-peptidase 2;Dipeptidyl-peptidase II;Dipeptidyl aminopeptidase II;Quiescent cell proline dipeptidase;Dipeptidyl peptidase 7	6.3392e-147		1.6287			0.23094	0.34029	5.2199	3.5662
AASPLGSPELCPSALHGLSQAMK	2321.15	IPI00748360	Uncharacterized protein KIAA1797;cDNA FLJ30554 fis, clone BRAWH2003693	4.8065e-08	0.69315			0.57769	1.0083
AASPQDLAGGYTSSLACHR	1960.91	IPI00793723	CDK-activating kinase assembly factor MAT1;RING finger protein MAT1;Menage a trois;CDK7/cyclin H assembly factor;p36;p35;Cyclin G1-interacting protein;RING finger protein 66;MNAT1 protein;Menage a trois homolog 1, cyclin H assembly factor (Xenopus laevis), isoform CRA_a	1.6961e-13		1.1834	1.9282	1.5249	1.5116	2.2289	1.0594	1.1448	2.0774
AASQAVEEMR	1090.51	IPI00005179	DNA-directed RNA polymerases I and III subunit RPAC1;DNA-directed RNA polymerases I and III 40 kDa polypeptide;RPC40;AC40;RPA39;POLR1C protein;Polymerase (RNA) I polypeptide C, 30kDa;cDNA FLJ57708, highly similar to DNA-directed RNA polymerase I 40 kDa polypeptide (EC 2.7.7.6)	0.00029384	1.7898	1.1636			1.8743		1.2038	1.4551
AASQPTSLAPEK	1198.62	IPI00657706	Lysophospholipid acyltransferase 7;1-acylglycerophosphatidylinositol O-acyltransferase;Lysophosphatidylinositol acyltransferase;Leukocyte receptor cluster member 4;Bladder and breast carcinoma-overexpressed gene 1 protein;Membrane-bound O-acyltransferase domain-containing protein 7;cDNA FLJ55184, highly similar to Homo sapiens leukocyte receptor cluster (LRC) member 4 (LENG4), mRNA;Putative uncha…	0.0004344							1.3693	0.56457	0.32731
AASQPTSLAPEKLREE	1725.89	IPI00657706	Lysophospholipid acyltransferase 7;1-acylglycerophosphatidylinositol O-acyltransferase;Lysophosphatidylinositol acyltransferase;Leukocyte receptor cluster member 4;Bladder and breast carcinoma-overexpressed gene 1 protein;Membrane-bound O-acyltransferase domain-containing protein 7;cDNA FLJ55184, highly similar to Homo sapiens leukocyte receptor cluster (LRC) member 4 (LENG4), mRNA;Putative uncha…	0.52309			0.41719
AASQSTQVPTITEGVAAALLLLK	2281.29	IPI00001159	Translational activator GCN1;GCN1-like protein 1;cDNA FLJ54481, highly similar to GCN1-like protein 1	6.0419e-55	1.2821	1.5879	1.1921			0.87993	1.3305	1.5652	1.2169
AASSAAQGAFQGN	1178.53	IPI00218850	Secretory carrier-associated membrane protein 2;cDNA FLJ77721, highly similar to Homo sapiens secretory carrier membrane protein 2 (SCAMP2), mRNA;Secretory carrier membrane protein 2, isoform CRA_b;cDNA, FLJ96582, Homo sapiens secretory carrier membrane protein 2 (SCAMP2), mRNA;SCAMP2 protein	2.4539e-08
AASSLLANLWQYNK	1577.82	IPI00026952	Plakophilin-3	1.247e-25		1.2798	1.2338	1.1406	0.60172	1.153	0.59612		0.77087
AASSSSSSAGGVSGSSVTGSGFSVSDLAPPRK	2883.38	IPI00060893	UPF0448 protein C10orf104;Metabolic syndrome-associated protein;Chromosome 10 open reading frame 104, isoform CRA_a	4.9925e-73	1.0585			2.3589
AASVEQR	759.388	IPI00063827	Abhydrolase domain-containing protein 14B;CCG1-interacting factor B;cDNA FLJ52710, highly similar to Abhydrolase domain-containing protein 14B;Putative uncharacterized protein ABHD14B;cDNA FLJ52723, highly similar to Abhydrolase domain-containing protein 14B	0.00043521			0.77436	2.4483		0.42261
AASVFVLYATSCANNFAMK	2063.98	IPI00010141	DNA polymerase epsilon subunit 3;DNA polymerase epsilon subunit p17;Chromatin accessibility complex 17;HuCHRAC17;Arsenic-transactivated protein	8.0291e-10		0.85738
AASVHTVGEDTEETPHR	1834.84	IPI00293331	Ribonucleases P/MRP protein subunit POP1;cDNA FLJ78653, highly similar to Homo sapiens processing of 1, ribonuclease P/MRP subunit (POP1), mRNA;Processing of 1, ribonuclease P/MRP subunit (S. cerevisiae)	1.6781e-12	1.8045		1.5611	0.57775	1.0602	0.95321		1.0356	1.5094
AASVHTVGEDTEETPHRWWIETCK	2838.3	IPI00293331	Ribonucleases P/MRP protein subunit POP1;cDNA FLJ78653, highly similar to Homo sapiens processing of 1, ribonuclease P/MRP subunit (POP1), mRNA;Processing of 1, ribonuclease P/MRP subunit (S. cerevisiae)	0.073775		0.81212					1.8586	1.4909
AASVVQPQPLVVVKEEK	1820.04	IPI00440727	Bromodomain-containing protein 4;HUNK1 protein;Similar to bromodomain-containing 4	0.10318			0.30243
AATAAADFTAK	1036.52	IPI00294536	cDNA FLJ51909, highly similar to Serine-threonine kinase receptor-associatedprotein;Serine-threonine kinase receptor-associated protein;UNR-interacting protein;WD-40 repeat protein PT-WD;MAP activator with WD repeats;cDNA, FLJ79540, highly similar to Serine-threonine kinase receptor-associatedprotein;Serine/threonine kinase receptor associated protein;cDNA, FLJ92599, highly similar to Homo sapien…	0.0047897							0.80914	1.5299	0.65506
AATAAAVVAEEDTELRDLLVQTLENSGVLNR	3267.69	IPI00013076	FGFR1 oncogene partner;HCG15017, isoform CRA_b;cDNA, FLJ93209, Homo sapiens FGFR1 oncogene partner (FOP), mRNA;cDNA FLJ75587, highly similar to Homo sapiens FGFR1 oncogene partner (FGFR1OP), transcript variant 2, mRNA;HCG15017, isoform CRA_a;cDNA FLJ52986, highly similar to FGFR1 oncogene partner;T-cell activation Rho GTPase-activating protein;T-cell activation GTPase-activating protein	2.9974e-15							0.49524	3.5356
AATALKDVVK	1014.61	IPI00299571	Protein disulfide-isomerase A6;Protein disulfide isomerase P5;Thioredoxin domain-containing protein 7;cDNA FLJ16143 fis, clone BRAMY2038516, highly similar to Protein disulfide-isomerase A6 (EC 5.3.4.1);Putative uncharacterized protein PDIA6;cDNA FLJ58023, highly similar to Protein disulfide-isomerase A6 (EC 5.3.4.1);cDNA FLJ58502, highly similar to Protein disulfide-isomerase A6 (EC 5.3.4.1);cDN…	0.00029384			0.94116			1.042			0.64147
AATALLEAGLAR	1155.66	IPI00174190	Protein-tyrosine phosphatase mitochondrial 1;PTEN-like phosphatase;Phosphoinositide lipid phosphatase;cDNA FLJ57723, moderately similar to Protein-tyrosine phosphatase mitochondrial 1, mitochondrial (EC 3.1.3.48)	1.5141e-09		3.0847
AATAPLLEAVDNLSAFASNPEFSSIPAQISPEGR	3469.74	IPI00298994	Talin-1;Talin 1	1.7288e-15	0.21708							0.14114	0.1449
AATASAGAGGIDGKPR	1398.72	IPI00219729	Mitochondrial 2-oxoglutarate/malate carrier protein;Solute carrier family 25 member 11;SLC25A11 protein;cDNA FLJ76014, highly similar to Homo sapiens solute carrier family 25 (mitochondrial carrier; oxoglutarate carrier), member 11 (SLC25A11), mRNA;Solute carrier family 25 (Mitochondrial carrier; oxoglutarate carrier), member 11, isoform CRA_b	1.4609e-113	0.73792	0.56259	0.79732	0.82875	0.25443	0.79516	1.0096	0.58377	0.78551
AATDGADTPFGR	1177.54	IPI00439948	RelA-associated inhibitor;Inhibitor of ASPP protein;PPP1R13B-like protein;NFkB-interacting protein 1;cDNA FLJ26816 fis, clone PRS06437	0.29287				1.1586
AATDIAR	716.382	IPI00550119	cDNA FLJ58821, highly similar to Septin-6;Septin 6 isoform E;Septin-6;Septin 6;Septin 6, isoform CRA_b;cDNA FLJ77872, highly similar to Homo sapiens SEPTIN6 type V (SEPTIN6) mRNA;Septin 6, isoform CRA_e;cDNA FLJ59646, highly similar to Septin-6;cDNA FLJ58747, highly similar to Septin-6;Septin 6, isoform CRA_d;cDNA FLJ59732, highly similar to Septin-6	1			0.47789		1.7177	0.41775	0.62985		0.73255
AATECMCNLAMSK	1485.61	IPI00735181	Protein unc-45 homolog A;GCUNC-45;Smooth muscle cell-associated protein 1;cDNA FLJ77677;Unc-45 homolog A (C. elegans), isoform CRA_a;cDNA FLJ43733 fis, clone TESTI1000545, highly similar to Homo sapiens unc-45 homolog A (UNC45A), transcript variant 3, mRNA	1.4349e-12	1.3248	1.2472	1.1666	1.2205	1.035		1.2966		1.2842
AATFFGCIGIDK	1298.63	IPI00290279	Adenosine kinase;Adenosine 5'-phosphotransferase;Adenosine kinase, isoform CRA_b;cDNA FLJ61435, moderately similar to Adenosine kinase (EC 2.7.1.20);cDNA FLJ57673, highly similar to Adenosine kinase (EC 2.7.1.20);cDNA FLJ75655, highly similar to Homo sapiens adenosine kinase (ADK), transcript variant ADK-short, mRNA;Adenosine kinase, isoform CRA_a	7.1533e-10	0.6042	0.68957	0.50238	1.4402				0.42155	0.43819
AATFFGCIGIDKFGEILK	1986.03	IPI00290279	Adenosine kinase;Adenosine 5'-phosphotransferase;Adenosine kinase, isoform CRA_b;cDNA FLJ61435, moderately similar to Adenosine kinase (EC 2.7.1.20);cDNA FLJ57673, highly similar to Adenosine kinase (EC 2.7.1.20);cDNA FLJ75655, highly similar to Homo sapiens adenosine kinase (ADK), transcript variant ADK-short, mRNA;Adenosine kinase, isoform CRA_a	0.23206			0.76401
AATFFGEVVK	1067.57	IPI00030770	Proteasome assembly chaperone 1;Down syndrome critical region protein 2;Chromosome 21 leucine-rich protein;cDNA, FLJ96455, highly similar to Homo sapiens Down syndrome critical region gene 2 (DSCR2), mRNA;Down syndrome critical region protein 2 isoform b (Down syndrome critical region gene 2, isoform CRA_a)	1.1689e-09		1.9047	1.7489		2.5446	2.1132	1.6094
AATFGLILDDVSLTHLTFGK	2118.14	IPI00017334	Prohibitin;cDNA FLJ78511, highly similar to Homo sapiens prohibitin (PHB), mRNA;Prohibitin, isoform CRA_a;cDNA, FLJ93035, Homo sapiens prohibitin (PHB), mRNA;PHB protein;Prohibitin variant	7.4919e-72	1.6648	0.97647	1.7563				1.079	0.851
AATGEEVSAEDLGGADLHCR	2056.91	IPI00784044	Methylcrotonoyl-CoA carboxylase beta chain, mitochondrial;3-methylcrotonyl-CoA:carbon dioxide ligase subunit beta;3-methylcrotonyl-CoA carboxylase non-biotin-containing subunit;3-methylcrotonyl-CoA carboxylase 2;cDNA FLJ33515 fis, clone BRAMY2005662, highly similar to Methylcrotonoyl-CoA carboxylase beta chain, mitochondrial (EC 6.4.1.4)	2.8218e-09	5.3127				0.65532
AATGEEVSAEDLGGADLHCRK	2185.01	IPI00784044	Methylcrotonoyl-CoA carboxylase beta chain, mitochondrial;3-methylcrotonyl-CoA:carbon dioxide ligase subunit beta;3-methylcrotonyl-CoA carboxylase non-biotin-containing subunit;3-methylcrotonyl-CoA carboxylase 2;cDNA FLJ33515 fis, clone BRAMY2005662, highly similar to Methylcrotonoyl-CoA carboxylase beta chain, mitochondrial (EC 6.4.1.4)	0.041014		4.1443			0.66427
AATGYRDPATGDTIPLFQAMQK	2351.16	IPI00010951	Epiplakin;450 kDa epidermal antigen;Putative uncharacterized protein DKFZp434G0719	1.036e-09	0.53402			2.6672	2.5065				3.6337
AATHGLMLGALQGDGPLPAELEELR	2558.32	IPI00305627	UPF0420 protein C16orf58;cDNA FLJ52509;cDNA FLJ58568	1.54e-29						0.29166
AATITATSPGALWGLDR	1699.89	IPI00554752	cAMP-dependent protein kinase type II-beta regulatory subunit;cDNA FLJ46798 fis, clone TRACH3031660, highly similar to cAMP-dependent protein kinase type II-beta regulatory subunit;CAMP-DEPENDENT PROTEIN KINASE TYPE II-BETA REGULATORY CHAIN;Protein kinase, cAMP-dependent, regulatory, type II, beta;Putative uncharacterized protein PRKAR2B	0.91637	0.71485	1.3101		1.9627	2.0149		1.9487
AATIVATSEGSLWGLDR	1745.89	IPI00219774	cAMP-dependent protein kinase type II-alpha regulatory subunit;cDNA FLJ75444, highly similar to Homo sapiens protein kinase, cAMP-dependent, regulatory, type II, alpha (PRKAR2A), mRNA;PRKAR2A protein;Protein kinase, cAMP-dependent, regulatory, type II, alpha;Protein kinase, cAMP-dependent, regulatory, type II, alpha, isoform CRA_b	2.4685e-31				0.59906
AATIVLQSYLR	1233.71	IPI00220154	Myosin-Va;Dilute myosin heavy chain, non-muscle;Myosin heavy chain 12;Myoxin;Myosin V;Putative uncharacterized protein MYO5A;MYO5A variant protein;cDNA FLJ50342, highly similar to Myosin-5A;Myosin Va;Myosin Va variant	5.5434e-05		0.6488
AATLAQELEK	1072.58	IPI00291939	Structural maintenance of chromosomes protein 1A;SMC1alpha protein;Sb1.8;cDNA FLJ77162, highly similar to Homo sapiens SMC1 structural maintenance of chromosomes 1-like 1 (SMC1L1), mRNA;SMC1A protein;Putative uncharacterized protein DKFZp686L19178;cDNA FLJ50250, highly similar to Structural maintenance of chromosome 1-like 1 protein	0.012569			1.1674			1.3281			2.1572
AATLEGWK	874.455	IPI00028005	Nuclear pore complex protein Nup107;Nucleoporin Nup107;107 kDa nucleoporin;cDNA FLJ11217 fis, clone PLACE1008044, highly similar to NUCLEAR PORE COMPLEX PROTEIN NUP107;cDNA FLJ58739, highly similar to Nuclear pore complex protein Nup107;NUP107 protein	1								0.45856	1.0143
AATLHVHSDQKPPHDGALGSQQNLVR	2775.42	IPI00807589	Protein cordon-bleu;COBL protein;Putative uncharacterized protein DKFZp547K059;Cordon-bleu homolog (Mouse);Cordon-bleu homolog (Mouse), isoform CRA_a	0.87441	0.10377	0.48264
AATLSTLAGQPLLER	1539.86	CON_00712693		1.4575e-10		0.037901	0.59592				0.0012673
AATMEIPIHGNGEAR	1565.76	IPI00021257	Arfaptin-2;ADP-ribosylation factor-interacting protein 2;Partner of RAC1;cDNA FLJ52523, highly similar to Arfaptin-2;cDNA FLJ51138, highly similar to Arfaptin-2;cDNA FLJ51105, highly similar to Arfaptin-2	0.0067724					0.82958		1.3219	1.7905
AATMSAVEAATCR	1337.61	IPI00939144	Pyrroline-5-carboxylate reductase 3;Pyrroline-5-carboxylate reductase-like protein;cDNA FLJ57148, highly similar to Homo sapiens pyrroline-5-carboxylate reductase-like (PYCRL), mRNA;cDNA FLJ57147, highly similar to Homo sapiens pyrroline-5-carboxylate reductase-like (PYCRL), mRNA	2.1069e-14	1.3705	1.2425		1.2741	1.0192			3.0291	2.1457
AATMTAAGHHAEVVVDPEDER	2205.01	IPI00328987	Bystin;Bystin-like	5.1672e-07	1.0562				1.5536
AATQELALLISR	1284.74	IPI00922476	EVPL protein;Envoplakin;210 kDa paraneoplastic pemphigus antigen;210 kDa cornified envelope precursor protein;p210;cDNA FLJ77044, highly similar to Homo sapiens envoplakin (EVPL), mRNA	7.2546e-06	1.2002		1.258
AATSGVPSIYAPSTYAHLSPAK	2188.12	IPI00409640	Lipolysis-stimulated lipoprotein receptor;Putative uncharacterized protein LSR;cDNA FLJ55699, highly similar to Homo sapiens liver-specific bHLH-Zip transcription factor (LISCH7), transcript variant 3, mRNA;cDNA PSEC0117 fis, clone PLACE1001904, moderately similar to LISCH protein;LSR protein	7.1136e-18	0.57712	0.72458	0.60867	0.72646	0.75751	0.46261	1.1222	1.4434	1.6418
AATSPALFNR	1046.55	IPI00456969	Cytoplasmic dynein 1 heavy chain 1;Cytoplasmic dynein heavy chain 1;Dynein heavy chain, cytosolic;cDNA FLJ52684, highly similar to Dynein heavy chain, cytosolic;Dynein heavy chain;Cytoplasmic dynein heavy chain	0.0032763						0.83418
AATSTLSVCDFLGEK	1597.77	IPI00748891	Putative uncharacterized protein DKFZp686J1254;Protein FAM177A1	3.0774e-24			0.88636				0.33543		1.3762
AATTLDEKIEK	1217.65	IPI00293078	Probable ATP-dependent RNA helicase DDX27;DEAD box protein 27;DEAD box polypeptide 27;cDNA FLJ61659, highly similar to Probable ATP-dependent RNA helicase DDX27 (EC 3.6.1.-);DEAD (Asp-Glu-Ala-Asp) box polypeptide 27;DDX27 protein;DEAD (Asp-Glu-Ala-Asp) box polypeptide 27 variant	1						1.0704
AATTQNILK	958.545	REV_IPI00002186	Brefeldin A-inhibited guanine nucleotide-exchange protein 2;cDNA FLJ12561 fis, clone NT2RM4000798, highly similar to Brefeldin A-inhibited guanine nucleotide-exchange protein 2;cDNA FLJ55398, highly similar to Brefeldin A-inhibited guaninenucleotide-exchange protein 2;ADP-ribosylation factor guanine nucleotide-exchange factor 2 variant;ARFGEF2 protein;Brefeldin A-inhibited guanine nucleotide-exch…	0.57928				1.1619
AATTVLQELK	1072.61	IPI00300789	Double-stranded RNA-binding protein Staufen homolog 2;cDNA FLJ78317, highly similar to Homo sapiens staufen, RNA binding protein, homolog 2 (Drosophila) (STAU2), mRNA;cDNA FLJ58766, highly similar to Double-stranded RNA-binding protein Staufen homolog 2;cDNA FLJ57953, highly similar to Double-stranded RNA-binding protein Staufen homolog 2;cDNA FLJ58771, highly similar to Double-stranded RNA-bindi…	0.080719			0.58542						1.9014
AAVAAGGLVGK	912.539	IPI00328309	mRNA-decapping enzyme 1B;Putative uncharacterized protein DCP1B;cDNA FLJ59742, highly similar to mRNA decapping enzyme 1B (EC 3.-.-.-);cDNA FLJ57612, highly similar to mRNA decapping enzyme 1B (EC 3.-.-.-)	0.0013428		1.9987		1.4873	2.1507				1.9411
AAVAASVGLSEGPAGSR	1498.77	IPI00384180	YrdC domain-containing protein, mitochondrial;Ischemia/reperfusion-inducible protein homolog;Dopamine receptor-interacting protein 3	1.6781e-12	1.0116			1.0356	0.45423
AAVAATAAAK	843.481	IPI00384497	Protein-tyrosine phosphatase-like member B	1.0307e-05	1.2568	1.5712		1.3265			1.5784	1.5499	1.1082
AAVAGEDGR	844.404	IPI00477313	Heterogeneous nuclear ribonucleoproteins C1/C2;cDNA FLJ75154, highly similar to Homo sapiens heterogeneous nuclear ribonucleoprotein C (C1/C2), mRNA;cDNA, FLJ92712, highly similar to Homo sapiens heterogeneous nuclear ribonucleoprotein C (C1/C2) (HNRPC), transcript variant 1, mRNA;cDNA, FLJ92657, highly similar to Homo sapiens heterogeneous nuclear ribonucleoprotein C (C1/C2) (HNRPC), transcript …	0.10105				1.0529		0.67424			1.2071
AAVAGLDKAER	1099.6	IPI00025273	Trifunctional purine biosynthetic protein adenosine-3;Phosphoribosylamine--glycine ligase;Glycinamide ribonucleotide synthetase;Phosphoribosylglycinamide synthetase;Phosphoribosylformylglycinamidine cyclo-ligase;Phosphoribosyl-aminoimidazole synthetase;AIR synthase;Phosphoribosylglycinamide formyltransferase;5'-phosphoribosylglycinamide transformylase;GAR transformylase;cDNA FLJ78616, highly simi…	0.13171			0.52427
AAVATFLQSVQVPEFTPK	1932.04	IPI00645078	Ubiquitin-like modifier-activating enzyme 1;Ubiquitin-activating enzyme E1;Protein A1S9;cDNA FLJ54582, highly similar to Ubiquitin-activating enzyme E1;cDNA FLJ53392, highly similar to Ubiquitin-activating enzyme E1;cDNA FLJ40024 fis, clone STOMA2007745, highly similar to UBIQUITIN-ACTIVATING ENZYME E1;Ubiquitin-like modifier activating enzyme 1;Ubiquitin activating enzyme E1	1.9232e-32	1.4758	1.6377	1.1242	1.6305	1.5621	1.1663	1.0917	1.0061	0.66916
AAVAVAVR	755.465	IPI00005979	Translation initiation factor eIF-2B subunit delta;eIF-2B GDP-GTP exchange factor subunit delta;Putative uncharacterized protein;Eukaryotic translation initiation factor 2B, subunit 4 delta, 67kDa, isoform CRA_e;Putative uncharacterized protein EIF2B4;EIF-2B-delta-like protein;Putative uncharacterized protein DKFZp586J0119	0.020806	1.0681	1.2834		0.69285					0.57157
AAVAWANQNRAPVLSIDPPVHEVEQGIDAK	3194.65	IPI00018009	Enhancer of mRNA-decapping protein 3;LSM16 homolog;YjeF domain-containing protein 1;YjeF N-terminal domain-containing protein 2;cDNA FLJ31777 fis, clone NT2RI2008171, highly similar to YjeF domain-containing protein 1;LSM16 homolog (EDC3, S. cerevisiae), isoform CRA_a	1.444e-07								2.4434
AAVAWEAGKPLSIEEIEVAPPK	2304.24	IPI00746777	Alcohol dehydrogenase class-3;Alcohol dehydrogenase class-III;Alcohol dehydrogenase 5;Alcohol dehydrogenase class chi chain;S-(hydroxymethyl)glutathione dehydrogenase;Glutathione-dependent formaldehyde dehydrogenase;RcADH5;Alcohol dehydrogenase 5 (Class III), chi polypeptide;ADH5 protein;Alcohol dehydrogenase 5 (Class III), chi polypeptide, isoform CRA_a;cDNA, FLJ92689, highly similar to Homo sap…	0.17701						1.097
AAVCGFEAFINGK	1382.67	IPI00296909	Poly [ADP-ribose] polymerase 4;Vault poly(ADP-ribose) polymerase;193 kDa vault protein;PARP-related/IalphaI-related H5/proline-rich;PARP4 protein;cDNA FLJ61556, highly similar to Poly (ADP-ribose) polymerase 4 (EC 2.4.2.30);Poly (ADP-ribose) polymerase family, member 4	1.7406e-15	0.37748		0.60005				0.076452		0.52779
AAVDAGFVPNDMQVGQTGK	1903.91	IPI00010810	Electron transfer flavoprotein subunit alpha, mitochondrial;Electron-transfer-flavoprotein, alpha polypeptide;Electron-transfer-flavoprotein, alpha polypeptide (Glutaric aciduria II);cDNA FLJ76486, highly similar to Homo sapiens electron-transfer-flavoprotein, alpha polypeptide (glutaric aciduria II) (ETFA), nuclear gene encoding mitochondrial protein, mRNA;Electron transfer flavoprotein alpha-su…	7.6146e-64	2.7465	3.1486	2.2931	0.38759	0.46787	0.29404	2.7841	2.1228	1.2776
AAVDLEK	744.402	IPI00332371	6-phosphofructokinase, liver type;Phosphofructokinase 1;Phosphohexokinase;Phosphofructo-1-kinase isozyme B;cDNA FLJ30173 fis, clone BRACE2000969, highly similar to 6-phosphofructokinase, liver type (EC 2.7.1.11);cDNA FLJ61026, highly similar to Homo sapiens phosphofructokinase, liver (PFKL), transcript variant 1, mRNA;Putative uncharacterized protein DKFZp686L2097;PFKL protein;Putative uncharacte…	0.26392			0.60471			0.77373
AAVEAAAEPVTVVAAVGPK	1748.97	IPI00410625	RUN domain-containing protein 1;cDNA FLJ55418, highly similar to Homo sapiens RUN domain containing 1 (RUNDC1), mRNA	4.6756e-40		4.8385			1.0706
AAVEALQSQALHATSQQPLR	2118.12	IPI00549434	Septin-8;Putative uncharacterized protein SEPT8;SEPT8 protein	7.4919e-72				0.94366	0.4941
AAVEALQSQALHATSQQPLRK	2246.21	IPI00549434	Septin-8;Putative uncharacterized protein SEPT8;SEPT8 protein	0.0045393							1.4386
AAVEDSGTTVETIK	1419.71	IPI00251559	E3 ubiquitin-protein ligase BRE1A;RING finger protein 20;RNF20 protein;Ring finger protein 20;cDNA, FLJ95178, highly similar to Homo sapiens ring finger protein 20 (RNF20), mRNA	4.1974e-45		0.70885	1.0159						2.8346
AAVEEGIVLGGGCALLR	1683.9	IPI00784154	60 kDa heat shock protein, mitochondrial;Heat shock protein 60;60 kDa chaperonin;Chaperonin 60;Mitochondrial matrix protein P1;P60 lymphocyte protein;HuCHA60;Mitochondrial heat shock 60kD protein 1 variant 1;cDNA FLJ54912, highly similar to 60 kDa heat shock protein, mitochondrial;cDNA FLJ51028, highly similar to 60 kDa heat shock protein, mitochondrial;cDNA FLJ54373, highly similar to 60 kDa hea…	3.3382e-73	2.1294	2.1268	2.0155	0.95558	1.4709	0.93052	2.4576	2.1957	1.7613
AAVEELLER	1028.55	IPI00019924	Tubulin-specific chaperone C;Tubulin-folding cofactor C;Tubulin-specific chaperone c;cDNA, FLJ93074, Homo sapiens tubulin-specific chaperone c (TBCC), mRNA	0.0049144			0.99786			1.2734			1.3469
AAVELEEPEDAR	1327.63	IPI00305068	Pre-mRNA-processing factor 6;U5 snRNP-associated 102 kDa protein;PRP6 homolog;cDNA, FLJ95067;cDNA FLJ10692 fis, clone NT2RP3000361, highly similar to Pre-mRNA-processing factor 6 homolog	1.5141e-09	0.87781		1.1192	1.3839	0.6995	0.82339			1.8594
AAVENLPTFLVELSR	1657.9	IPI00001639	Importin subunit beta-1;Karyopherin subunit beta-1;Nuclear factor P97;Importin-90;cDNA, FLJ95650, highly similar to Homo sapiens karyopherin (importin) beta 1 (KPNB1), mRNA;cDNA FLJ50715, highly similar to Importin beta-1 subunit;cDNA, FLJ79320, highly similar to Importin beta-1 subunit;Karyopherin (Importin) beta 1;Karyopherin (Importin) beta 1, isoform CRA_a	5.0621e-54	1.1065		0.95549		2.5671	2.4512	1.1688		0.84307
AAVESLGFILFR	1321.74	IPI00299608	26S proteasome non-ATPase regulatory subunit 1;26S proteasome regulatory subunit RPN2;26S proteasome regulatory subunit S1;26S proteasome subunit p112;cDNA, FLJ92896, highly similar to Homo sapiens proteasome (prosome, macropain) 26S subunit, non-ATPase, 1 (PSMD1), mRNA;PSMD1 protein;Putative uncharacterized protein PSMD1	9.622e-20	0.98861		1.3076	2.5108	1.7803	1.6557	1.0185	1.1052	0.82341
AAVETLGVPCFLGGMAR	1747.87	IPI00554541	Acetolactate synthase-like protein;IlvB-like protein;IlvB (Bacterial acetolactate synthase)-like isoform 1 variant	2.4685e-31	0.43732	0.65815	0.42122	0.26521	0.35138	0.26271	2.5154	2.1906	1.7035
AAVEWFDGK	1021.49	IPI00009841	cDNA FLJ31747 fis, clone NT2RI2007377, highly similar to RNA-BINDING PROTEIN EWS;Ewing sarcoma breakpoint region 1, isoform CRA_h;RNA-binding protein EWS;EWS oncogene;Ewing sarcoma breakpoint region 1 protein;Ewing sarcoma breakpoint region 1;Ewing sarcoma breakpoint region 1, isoform CRA_f;EWSR1 protein;Ewing sarcoma breakpoint region 1, isoform CRA_b;Ewing sarcoma breakpoint region 1, isoform C…	0.0049144	0.75383	0.78265	0.70987		1.0858		1.0319		1.4808
AAVEWFDGKDFQGSK	1683.79	IPI00009841	cDNA FLJ31747 fis, clone NT2RI2007377, highly similar to RNA-BINDING PROTEIN EWS;Ewing sarcoma breakpoint region 1, isoform CRA_h;RNA-binding protein EWS;EWS oncogene;Ewing sarcoma breakpoint region 1 protein;Ewing sarcoma breakpoint region 1;Ewing sarcoma breakpoint region 1, isoform CRA_f;EWSR1 protein;Ewing sarcoma breakpoint region 1, isoform CRA_b;Ewing sarcoma breakpoint region 1, isoform C…	0.0026593			0.63735			1.1555			1.5886
AAVGAGGSTAAPGPGAVSAGALEPGTASAAHRR	2842.44	IPI00019254	UDP-galactose translocator;UDP-galactose transporter;Solute carrier family 35 member A2;SLC35A2 protein;Solute carrier family 35 (UDP-galactose transporter), member A2, isoform CRA_d;cDNA FLJ77206, highly similar to Human UDP-galactose translocator;cDNA FLJ75119, highly similar to Homo sapiens solute carrier family 35 (UDP-galactose transporter), member A2, transcript variant 2, mRNA;Solute carri…	6.8039e-79				0.32279	0.37718
AAVGRPLDK	925.535	IPI00938079	cDNA FLJ55458, highly similar to Programmed cell death 6-interacting protein;cDNA FLJ56126, highly similar to Programmed cell death 6-interacting protein;Dopamine receptor interacting protein 4;PDCD6IP protein;Programmed cell death 6-interacting protein;ALG-2-interacting protein 1;Hp95;Programmed cell death 6 interacting protein	1							0.49903
AAVGRPLDKHEGALETLLR	2045.14	IPI00938079	cDNA FLJ55458, highly similar to Programmed cell death 6-interacting protein;cDNA FLJ56126, highly similar to Programmed cell death 6-interacting protein;Dopamine receptor interacting protein 4;PDCD6IP protein;Programmed cell death 6-interacting protein;ALG-2-interacting protein 1;Hp95;Programmed cell death 6 interacting protein	0.00034495			0.57139			0.5055			0.20268
AAVHLEGKIEQAQR	1548.84	IPI00307162	Vinculin;Metavinculin;cDNA FLJ59659, highly similar to Vinculin;cDNA FLJ45031 fis, clone BRAWH3018548, highly similar to Vinculin	2.8796e-06			0.19458			0.81304
AAVHTYGIASVPNQPLK	1764.95	IPI00005904	Probable ATP-dependent RNA helicase DDX20;DEAD box protein 20;DEAD box protein DP 103;Component of gems 3;Gemin-3;cDNA FLJ50269, highly similar to Probable ATP-dependent RNA helicase DDX20 (EC 3.6.1.-);DEAD (Asp-Glu-Ala-Asp) box polypeptide 20;DEAD-box corepressor DP103;Homo sapiens clone CDABP0082 mRNA sequence	0.25563	2.1096
AAVIGDVIR	912.539	IPI00015953	Nucleolar RNA helicase 2;Nucleolar RNA helicase II;Nucleolar RNA helicase Gu;RH II/Gu;Gu-alpha;DEAD box protein 21;DDX21 protein;DEAD/H(Asp-Glu-Ala-Asp/His)box polypeptide 21;DEAD (Asp-Glu-Ala-Asp) box polypeptide 21, isoform CRA_c;cDNA, FLJ96663, Homo sapiens DEAD (Asp-Glu-Ala-Asp) box polypeptide 21 (DDX21),mRNA	0.0049144	1.1233		0.90018	0.33249		0.54033	1.2715		2.168
AAVIGPDVFAK	1086.61	IPI00010951	Epiplakin;450 kDa epidermal antigen;Putative uncharacterized protein DKFZp434G0719	0.001212	0.74981	0.8452	0.8052	1.1621	1.2107	2.9669	3.0851	4.7345	0.9398
AAVKDVEEEKFPTQLSR	1946.01	IPI00305833	WD40 repeat-containing protein SMU1;Smu-1 suppressor of mec-8 and unc-52 protein homolog;CDW3/SMU1;Smu-1 suppressor of mec-8 and unc-52 homolog (C. elegans), isoform CRA_a;Putative uncharacterized protein SMU1;cDNA FLJ54259, highly similar to Smu-1 suppressor of mec-8 and unc-52 protein homolog	1.6781e-12			0.71415						1.2961
AAVLDHLR	893.508	IPI00304676	Integrator complex subunit 5	0.095697
AAVLEAMTAFR	1178.61	IPI00790373	Aminolevulinate, delta-, dehydratase;Delta-aminolevulinic acid dehydratase;Porphobilinogen synthase	8.5931e-21	1.6678	1.7904		0.72079	0.33619	0.55134	3.3228	2.9862
AAVLLEQER	1027.57	IPI00221106	Splicing factor 3B subunit 2;Pre-mRNA-splicing factor SF3b 145 kDa subunit;SF3b150;Spliceosome-associated protein 145;cDNA FLJ76788, highly similar to Homo sapiens splicing factor 3b, subunit 2, 145kDa (SF3B2), mRNA;cDNA FLJ56485, highly similar to Splicing factor 3B subunit 2;SF3B2 protein;Putative uncharacterized protein DKFZp781L0540	0.0049144		2.1471	1.4702			1.8064	2.3032	1.0759	1.8657
AAVLNAER	842.461	IPI00009315	Golgi resident protein GCP60;Acyl-CoA-binding domain-containing protein 3;Golgi phosphoprotein 1;Golgi complex-associated protein 1;PBR- and PKA-associated protein 7;Peripheral benzodiazepine receptor-associated protein PAP7;Acyl-Coenzyme A binding domain containing 3, isoform CRA_a;cDNA, FLJ95272, Homo sapiens golgi complex associated protein 1, 60kDa (GOCAP1), mRNA	0.016114	0.63481	0.63701	0.75036			0.24483			0.7926
AAVLQELATHLHPAEPEEGDSNVAR	2653.31	IPI00064666	Protein FAM84B;Protein NSE2;Breast cancer membrane protein 101;cDNA FLJ76064	2.3599e-17		1.1411			0.8494	0.81308
AAVLQQVLER	1125.65	IPI00742682	Nucleoprotein TPR;TPR protein;Tpr protein;Tpr;Translocated promoter region (To activated MET oncogene)	3.8861e-24	0.96343		1.1643			1.4071		2.0689	1.5055
AAVLQR	656.397	IPI00006952	Beta-lactamase-like protein 2;cDNA FLJ76011, highly similar to Homo sapiens lactamase, beta 2 (LACTB2), mRNA	0.10233		0.52691	0.45909						0.8643
AAVLYVMDLSEQCGHGLR	2017.97	IPI00385042	Nucleolar GTP-binding protein 1;Chronic renal failure gene protein;GTP-binding protein NGB;cDNA FLJ10686 fis, clone NT2RP3000252, highly similar to Nucleolar GTP-binding protein 1;cDNA FLJ53992, highly similar to Nucleolar GTP-binding protein 1;cDNA FLJ56266, highly similar to Nucleolar GTP-binding protein 1;cDNA FLJ55652, highly similar to Nucleolar GTP-binding protein 1;G protein-binding protei…	3.3526e-07	1.1623	0.85092	1.207	0.56153		0.96044
AAVMATLLFPGR	1245.69	IPI00911064	cDNA FLJ58961, highly similar to APAF1-interacting protein;APAF1-interacting protein;cDNA FLJ77906, highly similar to Homo sapiens APAF1 interacting protein, mRNA;Putative uncharacterized protein APIP	8.696e-08		0.46775
AAVMHDILDMMPEGIK	1769.85	IPI00007928	Pre-mRNA-processing-splicing factor 8;Splicing factor Prp8;PRP8 homolog;220 kDa U5 snRNP-specific protein;p220;cDNA FLJ57882, highly similar to Pre-mRNA-processing-splicing factor 8;U5 snRNP-specific protein variant;Apoptosis-regulated protein 1;Apoptosis-regulated protein 2	0.0083964		1.2961				1.1868
AAVMVYDDANKK	1323.65	IPI00411623	Protein enabled homolog;cDNA FLJ45654 fis, clone CTONG2012123, moderately similar to Mus musculus enabled homolog (Drosophila) (Enah);cDNA FLJ77490, highly similar to Homo sapiens enabled homolog (Drosophila) (ENAH), transcript variant 2, mRNA	0.27754			0.29269			0.16757
AAVPDAVGK	826.455	IPI00646182	cDNA FLJ55427, highly similar to Sodium/potassium-transporting ATPase alpha-1 chain (EC 3.6.3.9);cDNA FLJ60077, highly similar to Sodium/potassium-transporting ATPase alpha-1 chain (EC 3.6.3.9);Sodium/potassium-transporting ATPase subunit alpha-1;Na(+)/K(+) ATPase alpha-1 subunit;cDNA FLJ53830, highly similar to Sodium/potassium-transporting ATPase alpha-1 chain (EC 3.6.3.9);cDNA FLJ52430, highly…	0.57928		1.103	0.75205						1.0078
AAVPELLQQQEEDR	1624.81	IPI00295209	Sorting nexin-5;Sorting nexin 5;Sorting nexin 5, isoform CRA_b;Sorting nexin 5 variant;SNX5 protein;cDNA FLJ55170, highly similar to Sorting nexin-5;cDNA FLJ41909 fis, clone PEBLM2007774	3.6842e-34		1.2371
AAVPELLQQQEEDRSK	1839.93	IPI00295209	Sorting nexin-5;Sorting nexin 5;Sorting nexin 5, isoform CRA_b;Sorting nexin 5 variant;SNX5 protein;cDNA FLJ55170, highly similar to Sorting nexin-5;cDNA FLJ41909 fis, clone PEBLM2007774	5.1655e-27	1.0373	1.2911			0.94629			1.3208
AAVPLGGFLCNVADK	1530.79	IPI00414973	FAST kinase domain-containing protein 5;cDNA FLJ58294	6.4616e-42			0.56374			0.2653			0.66068
AAVPSGASTGIYEALELR	1803.94	IPI00465248	Alpha-enolase;2-phospho-D-glycerate hydro-lyase;Non-neural enolase;Enolase 1;Phosphopyruvate hydratase;C-myc promoter-binding protein;MBP-1;MPB-1;Plasminogen-binding protein;Enolase;Gamma-enolase;Neural enolase;Neuron-specific enolase;Enolase 2;Beta-enolase;Muscle-specific enolase;Skeletal muscle enolase;Enolase 3	7.1535e-62	0.59339	0.59455	0.6197	0.9663	1.3673	1.3793	0.57892	0.45785	0.41981
AAVPSGASTGIYEALELRDNDK	2276.13	IPI00465248	Alpha-enolase;2-phospho-D-glycerate hydro-lyase;Non-neural enolase;Enolase 1;Phosphopyruvate hydratase;C-myc promoter-binding protein;MBP-1;MPB-1;Plasminogen-binding protein;Enolase	1.2816e-46	0.71368	0.72955			1.4381		0.55124	0.47917
AAVPSGASTGIYEALELRDNDKTR	2533.28	IPI00465248	Alpha-enolase;2-phospho-D-glycerate hydro-lyase;Non-neural enolase;Enolase 1;Phosphopyruvate hydratase;C-myc promoter-binding protein;MBP-1;MPB-1;Plasminogen-binding protein;Enolase	3.3821e-08			0.42125
AAVQAAEVK	885.492	IPI00014238	Lysyl-tRNA synthetase;Lysine--tRNA ligase;cDNA FLJ44621 fis, clone BRACE2016896, highly similar to Lysyl-tRNA synthetase (EC 6.1.1.6)	2.4899e-07	1.6646		1.5134	0.85429	7.16	2.8128
AAVQAAEVKVDGSEPK	1597.83	IPI00014238	Lysyl-tRNA synthetase;Lysine--tRNA ligase;cDNA FLJ44621 fis, clone BRACE2016896, highly similar to Lysyl-tRNA synthetase (EC 6.1.1.6)	1.3222e-59		2.1555				3.86
AAVQFLNNAWGIQK	1558.83	IPI00007729	Nucleolar protein 7;Nucleolar protein of 27 kDa	0.6461							2.8903
AAVQMDPELAK	1171.59	IPI00791333	Chromosome 20 open reading frame 4;Uncharacterized protein C20orf4	0.044919		0.85874			1.935
AAVQVLDDIEK	1199.64	IPI00024934	Methylmalonyl-CoA mutase, mitochondrial;Methylmalonyl-CoA isomerase;cDNA, FLJ92992, highly similar to Homo sapiens methylmalonyl Coenzyme A mutase (MUT), nuclear gene encoding mitochondrial protein, mRNA;Methylmalonyl Coenzyme A mutase variant	3.8404e-06		1.8493			0.80026
AAVQVVGSWPSVQPR	1579.85	IPI00464999	HEAT repeat-containing protein 6;Amplified in breast cancer protein 1	1.3204e-24	6.3617	2.7484		0.89546	1.0294	0.73599		4.5174	6.0002
AAVSHWQQQSYLDSGIHSGATTTAPSLSGK	3084.49	IPI00017292	Catenin beta-1;Beta-catenin;Catenin (Cadherin-associated protein), beta 1, 88kDa, isoform CRA_a;cDNA FLJ78465, highly similar to Homo sapiens catenin (cadherin-associated protein), beta 1, 88kDa (CTNNB1), mRNA;cDNA FLJ57878, highly similar to Beta-catenin;cDNA FLJ59415, highly similar to Beta-catenin;cDNA FLJ59565, highly similar to Beta-catenin	3.8779e-94	0.24303	0.24418	0.37602				0.28044	0.17374	0.35155
AAVTAFWGK	949.502	CON_00716455		0.036314									0.010041
AAVTEAVR	815.45	IPI00328361	Seryl-tRNA synthetase, mitochondrial;Seryl-tRNA(Ser/Sec) synthetase;Serine--tRNA ligase;SerRSmt;cDNA FLJ58521, highly similar to Seryl-tRNA synthetase, mitochondrial (EC 6.1.1.11);cDNA FLJ58901, highly similar to Seryl-tRNA synthetase, mitochondrial (EC 6.1.1.11);cDNA FLJ58300, highly similar to Seryl-tRNA synthetase, mitochondrial (EC 6.1.1.11);cDNA FLJ58068, highly similar to Seryl-tRNA synthet…	0.37971									1.5225
AAVTMSVPGR	987.517	IPI00926581	MYH14 variant protein;Myosin-14;Myosin heavy chain 14;Myosin heavy chain, non-muscle IIc;Non-muscle myosin heavy chain IIc;Nonmuscle myosin heavy chain II-C variant;MYH14 protein;cDNA FLJ43092 fis, clone COLON2002520, highly similar to Myosin-14;cDNA FLJ56368, highly similar to Myosin-14;Myosin;cDNA FLJ16179 fis, clone BRHIP3000070, highly similar to Myosin-14	0.018797	0.36904	1.0398	0.24596	0.60024	0.72617
AAVTSLFAK	906.517	CON_00713928		0.0012138						0.016445		0.11013
AAVVENVVK	927.539	IPI00023322	Zinc finger protein ubi-d4;Requiem;Apoptosis response zinc finger protein;D4, zinc and double PHD fingers family 2;cDNA FLJ76908, highly similar to Homo sapiens D4, zinc and double PHD fingers family 2 (DPF2), mRNA;D4, zinc and double PHD fingers family 2, isoform CRA_a;cDNA FLJ54147, highly similar to Zinc-finger protein ubi-d4	0.0012138	0.83194	1.786	1.2263			1.1932
AAVVHHFESFPAGSTLIFYK	2220.14	IPI00168878	Torsin-1A-interacting protein 2;Lumenal domain-like LAP1	1.71e-10	0.281	1.0319			1.0115		0.8118	0.64952
AAVWQQVLAVDAR	1425.77	IPI00016988	WD repeat-containing protein 13;cDNA, FLJ95601, highly similar to Homo sapiens WD repeat domain 13 (WDR13), mRNA;WDR13;WDR13 protein	1		1.4364							0.38539
AAVYNHFISDGVK	1419.71	CON_00713505		1.2376e-11	0.060119	0.011362	0.011587		0.04869	0.096351	0.025491		0.043367
AAVYNHFISDGVKK	1547.81	CON_00713505		0.070351					0.54709
AAVYSGISLK	1007.57	IPI00028980	Unhealthy ribosome biogenesis protein 2 homolog;cDNA FLJ75337;URB2 protein	0.6481				0.67494
AAWEAYLSR	1065.52	IPI00003923	Uridine 5'-monophosphate synthase;Orotate phosphoribosyltransferase;Orotidine 5'-phosphate decarboxylase;OMPdecase;Uridine monophosphate synthetase isoform A;cDNA FLJ75687, highly similar to Homo sapiens uridine monophosphate synthetase (orotate phosphoribosyl transferase and orotidine-5'-decarboxylase) (UMPS), mRNA;Uridine monophosphate synthetase (Orotate phosphoribosyl transferase and orotidin…	1.1749e-10	1.5642	1.6411		2.3808	2.7427	2.5485	1.7552	2.031	1.8561
AAWEVDSGRR	1145.56	IPI00513827	Putative uncharacterized protein DKFZp686M24262;Acyl-Coenzyme A dehydrogenase, C-4 to C-12 straight chain;Acyl-Coenzyme A dehydrogenase, C-4 to C-12 straight chain, isoform CRA_a;Medium-chain specific acyl-CoA dehydrogenase, mitochondrial;cDNA FLJ52595, highly similar to Medium-chain specific acyl-CoA dehydrogenase, mitochondrial (EC 1.3.99.3);cDNA FLJ50422, highly similar to Medium-chain specifi…	1			0.46282						0.39862
AAWGEETDYTPVWCMR	1970.83	IPI00301489	Uroporphyrinogen decarboxylase;cDNA FLJ59203, moderately similar to Uroporphyrinogen decarboxylase (EC 4.1.1.37)	1.3222e-59	1.3637						0.32939	0.40982	0.25266
AAYADLLTPLISK	1374.78	IPI00916258	WD repeat-containing protein 47;Putative uncharacterized protein ENSP00000383599;cDNA FLJ59020, highly similar to WD repeat protein 47	2.1069e-14	0.91588						0.31647	0.26153	0.25911
AAYDVSSFSFFQR	1523.7	IPI00008569	Synaptobrevin homolog YKT6;SNARE protein Ykt6;SNARE protein Ykt6, isoform CRA_a;cDNA, FLJ93006, Homo sapiens SNARE protein Ykt6 (YKT6), mRNA;YKT6 v-SNARE protein;cDNA FLJ50174, highly similar to Homo sapiens SNARE protein Ykt6 (YKT6), mRNA	6.9831e-28	0.75063	1.0508	0.55298	0.045013	0.85906	1.182		0.8828	0.62424
AAYEAELGDAR	1164.54	IPI00021405	Lamin-A/C;70 kDa lamin;Renal carcinoma antigen NY-REN-32;Lamin A/C transcript variant 1;Lamin A/C;Progerin;Lamin A/C, isoform CRA_b;LMNA protein;Rhabdomyosarcoma antigen MU-RMS-40.12	8.5931e-21	0.40952	0.14479	0.48281		0.82141	1.1695	1.6638		0.45586
AAYEAELGDARK	1292.64	IPI00021405	Lamin-A/C;70 kDa lamin;Renal carcinoma antigen NY-REN-32;Lamin A/C transcript variant 1;Lamin A/C;Progerin;Lamin A/C, isoform CRA_b;LMNA protein;Rhabdomyosarcoma antigen MU-RMS-40.12	9.622e-20	0.28631	0.16489	0.54841		0.37285	1.4703	0.13878	0.21979	0.51472
AAYEAFCR	986.428	IPI00336008	cDNA FLJ78564, highly similar to Homo sapiens aldehyde dehydrogenase 5 family, member A1 (succinate-semialdehyde dehydrogenase) (ALDH5A1), nuclear gene encoding mitochondrial protein, transcript variant 2, mRNA;Succinic semialdehyde dehydrogenase;Succinate-semialdehyde dehydrogenase, mitochondrial;NAD(+)-dependent succinic semialdehyde dehydrogenase;Aldehyde dehydrogenase family 5 member A1;cDNA …	0.10158							5.2414
AAYEHFHR	1029.48	IPI00298057	Periplakin;195 kDa cornified envelope precursor protein;190 kDa paraneoplastic pemphigus antigen	0.61652		2.3188						0.22798	0.89346
AAYFGIYDTAK	1218.59	IPI00007188	ADP/ATP translocase 2;Adenine nucleotide translocator 2;ADP,ATP carrier protein 2;Solute carrier family 25 member 5;ADP,ATP carrier protein, fibroblast isoform;cDNA, FLJ96310, highly similar to Homo sapiens solute carrier family 25 (mitochondrial carrier; adenine nucleotide translocator), member 5 (SLC25A5), mRNA;SLC25A5 protein	5.4093e-10	1.3857	0.62209	1.1278	1.1766	0.51221	1.6466	1.9271	2.4313	3.1784
AAYFGVYDTAK	1204.58	IPI00291467	ADP/ATP translocase 1;Adenine nucleotide translocator 1;ADP,ATP carrier protein 1;Solute carrier family 25 member 4;ADP,ATP carrier protein, heart/skeletal muscle isoform T1;cDNA FLJ75273, highly similar to Homo sapiens solute carrier family 25 (mitochondrial carrier; adenine nucleotide translocator), member 4, mRNA;Solute carrier family 25 member 4 variant;ADP/ATP translocase 3;Adenine nucleotid…	5.4093e-10	2.6934	1.5344	2.1118	0.82045	0.30231	1.3511	0.55947	0.68822	1.0016
AAYIYIR	868.481	IPI00028520	NADH dehydrogenase [ubiquinone] flavoprotein 1, mitochondrial;NADH-ubiquinone oxidoreductase 51 kDa subunit;Complex I-51kD;NADH dehydrogenase flavoprotein 1;NADH dehydrogenase (Ubiquinone) flavoprotein 1, 51kDa variant;NDUFV1 protein;NADH dehydrogenase (Ubiquinone) flavoprotein 1, 51kDa, isoform CRA_d;cDNA FLJ57949, highly similar to NADH-ubiquinone oxidoreductase 51 kDa subunit, mitochondrial (E…	0.011524	2.1374			0.62114	0.17544	0.57745
AAYLLGCSLEELSSAIFK	1971	IPI00760846	Myosin-XVIIIa;Myosin containing a PDZ domain;Molecule associated with JAK3 N-terminus;SP-A receptor subunit SP-R210 alphaS;cDNA FLJ59649, highly similar to Myosin-18A;cDNA FLJ16503 fis, clone FEBRA2008681, highly similar to Myosin-18A;HCG27198, isoform CRA_a;cDNA FLJ59676, highly similar to Myosin-18A;cDNA FLJ60372, highly similar to Myosin-18A;cDNA FLJ60377, highly similar to Myosin-18A;Jak3 N-t…	4.3803e-110						0.31943			0.24844
AAYLNLSQEPAHPAMALHAR	2160.09	IPI00465222	Chromodomain-helicase-DNA-binding protein 3;ATP-dependent helicase CHD3;Mi-2 autoantigen 240 kDa protein;Mi2-alpha;Zinc finger helicase;cDNA FLJ43940 fis, clone TESTI4014175, highly similar to Chromodomain helicase-DNA-binding protein 3 (EC 3.6.1.-);cDNA FLJ59330, highly similar to Chromodomain helicase-DNA-binding protein 3 (EC 3.6.1.-);CHD3 protein;cDNA FLJ58804, highly similar to Chromodomain …	0.0001119	0.73377	0.61944	0.46115	0.77664	0.42729	0.81066	3.0212	2.9246	0.97991
AAYLNMSEDPSHPSMALNTR	2204	IPI00455210	Chromodomain-helicase-DNA-binding protein 4;ATP-dependent helicase CHD4;Mi-2 autoantigen 218 kDa protein;Mi2-beta;cDNA FLJ16830 fis, clone UTERU3022536, highly similar to Chromodomain helicase-DNA-binding protein 4 (EC 3.6.1.-);CHD4 protein	2.8218e-09	1.0054			0.87046	0.73799		1.7148
AAYLQETGKPLDETLK	1775.93	IPI00218918	Annexin A1;Annexin-1;Annexin I;Lipocortin I;Calpactin II;Chromobindin-9;p35;Phospholipase A2 inhibitory protein;ANXA1 protein;Annexin A1, isoform CRA_a	3.055e-24	0.036417	0.036528	0.0082598				0.0059912	0.0030637
AAYLQETGKPLDETLKK	1904.03	IPI00218918	Annexin A1;Annexin-1;Annexin I;Lipocortin I;Calpactin II;Chromobindin-9;p35;Phospholipase A2 inhibitory protein;ANXA1 protein;Annexin A1, isoform CRA_a	5.7597e-18	0.010464	0.0038646	0.0042286	0.20076			0.013217	0.023379	0.010766
AAYLQWR	906.471	IPI00300697	Vacuolar protein sorting-associated protein 11 homolog;RING finger protein 108;Vacuolar protein sorting 11 (Yeast homolog) variant;Putative uncharacterized protein DKFZp564P2364	0.14153	1.3076	1.7616	1.3939	0.78811	0.74625	0.52474		1.0963	0.60978
AAYLSDPR	891.445	IPI00296337	DNA-dependent protein kinase catalytic subunit;DNPK1;p460	0.012674			0.81801			0.58788
AAYLSDPRAPPCEYK	1736.82	IPI00296337	DNA-dependent protein kinase catalytic subunit;DNPK1;p460	0.030403		0.67354
AAYLSMFGK	986.49	IPI00815840	Tetratricopeptide repeat protein 39A;Differentially expressed in MCF7 with estradiol protein 6;cDNA FLJ53630;cDNA FLJ54565	0.0012138		7.7786
AAYNLVR	805.445	IPI00017704	Coactosin-like protein;Coactosin-like 1 (Dictyostelium), isoform CRA_b;cDNA, FLJ96769, Homo sapiens coactosin-like 1 (Dictyostelium) (COTL1), mRNA	0.098046	0.67126	0.099775	0.11594
AAYNLVRDDGSAVIWVTFK	2124.1	IPI00017704	Coactosin-like protein;Coactosin-like 1 (Dictyostelium), isoform CRA_b;cDNA, FLJ96769, Homo sapiens coactosin-like 1 (Dictyostelium) (COTL1), mRNA	9.4284e-07		0.11883						0.30552
AAYNPGQAVPWNAVK	1584.8	IPI00182757	Protein KIAA1967;Deleted in breast cancer gene 1 protein;p30 DBC;cDNA FLJ38393 fis, clone FEBRA2007212	3.0774e-24	6.6448	3.2936		1.0499	1.5428		1.5879		1.3778
AAYPDLENPPLLVTPSQQAK	2151.12	IPI00004860	Arginyl-tRNA synthetase, cytoplasmic;Arginine--tRNA ligase;cDNA, FLJ95667, highly similar to Homo sapiens arginyl-tRNA synthetase (RARS), mRNA;cDNA FLJ50285, highly similar to Arginyl-tRNA synthetase (EC 6.1.1.19);Arginyl-tRNA synthetase variant	7.4919e-72	1.2103	1.5517			0.79938	0.62946	0.98724	0.83189	0.91487
AAYQVAALPK	1030.58	IPI00005038	Ribonuclease UK114;14.5 kDa translational inhibitor protein;p14.5;UK114 antigen homolog;Heat-responsive protein 12;UK114 protein;Heat-responsive protein 12, isoform CRA_a	0.012569						0.5166
AAYSFYNVHTQTPLLDLMSDALVLAK	2880.47	IPI00329692	Glycylpeptide N-tetradecanoyltransferase 1;Peptide N-myristoyltransferase 1;Myristoyl-CoA:protein N-myristoyltransferase 1;Glycylpeptide N-tetradecanoyltransferase;Myristoyl-CoA:protein N-myristoyltransferase	9.1936e-31		0.40261						0.61544
AAYSNFWCGMTSQGYYK	2032.84	IPI00168262	Glycosyltransferase 25 family member 1;cDNA FLJ32578 fis, clone SPLEN2000258, highly similar to Homo sapiens glycosyltransferase 25 domain containing 1 (GLT25D1), mRNA;GLT25D1 protein;cDNA: FLJ22329 fis, clone HRC05659	4.2264e-101	0.44576	0.54535			0.67609		0.88033	0.60511	0.41223
AAYSYRPGPGAGPGPAAGAALPDQSFLWNVFQR	3388.67	IPI00025277	Programmed cell death protein 6;Apoptosis-linked gene 2 protein;Probable calcium-binding protein ALG-2;Programmed cell death 6 variant;Programmed cell death 6;HCG1985580, isoform CRA_f;cDNA FLJ60532, moderately similar to Programmed cell death protein 6;PDCD6 protein	3.8894e-136				0.13639			0.52029	0.38686
AAYTIINGNPGQSFEIHTNPQTNEGMLSVVK	3329.64	IPI00024046	Cadherin-13;Truncated cadherin;Heart cadherin;P105;cDNA FLJ50547, highly similar to Cadherin-13;cDNA FLJ50610, highly similar to Cadherin-13;cDNA FLJ52398, highly similar to Cadherin-13;cDNA FLJ54304, highly similar to Cadherin-13	2.3177e-26
AAYVLFYQR	1129.59	IPI00000728	Ubiquitin carboxyl-terminal hydrolase 15;Ubiquitin thioesterase 15;Ubiquitin-specific-processing protease 15;Deubiquitinating enzyme 15;Unph-2;Unph4;Ubiquitin carboxyl-terminal hydrolase;USP15 protein;Ubiquitin carboxyl-terminal hydrolase 11;Ubiquitin thioesterase 11;Ubiquitin-specific-processing protease 11;Deubiquitinating enzyme 11;Ubiquitin carboxyl-terminal hydrolase 4;Ubiquitin thioesterase…	0.0049144	1.45	1.2323	1.4199	1.8707	1.7455
AAYWEEEPAEVRR	1604.76	IPI00026969	SEC23-interacting protein;p125;cDNA FLJ10273 fis, clone HEMBB1001137, highly similar to SEC23-interacting protein;cDNA FLJ13176 fis, clone NT2RP3003846, highly similar to SEC23-interacting protein;cDNA FLJ55643, highly similar to SEC23-interacting protein	0.68863					0.31986
ACACAHGMLAEDGASCR	1835.72	IPI00020557	Prolow-density lipoprotein receptor-related protein 1;Alpha-2-macroglobulin receptor;Apolipoprotein E receptor;Low-density lipoprotein receptor-related protein 1 85 kDa subunit;Low-density lipoprotein receptor-related protein 1 515 kDa subunit;Low-density lipoprotein receptor-related protein 1 intracellular domain;Low density lipoprotein-related protein 1 variant;LRP protein;Alpha-2 macroglobulin…	7.042e-05									0.055821
ACADATLSQITNNIDPVGR	2014.97	IPI00026268	Guanine nucleotide-binding protein G(I)/G(S)/G(T) subunit beta-1;Transducin beta chain 1;cDNA, FLJ92996, highly similar to Homo sapiens guanine nucleotide binding protein (G protein), beta polypeptide 1 (GNB1), mRNA;cDNA FLJ16663 fis, clone THYMU2005759, highly similar to Guanine nucleotide-binding proteinG(I)/G(S)/G(T) subunit beta 1;GNB1 protein;Beta-subunit signal transducing proteins GS/GI;Gu…	4.9214e-50	0.82113	0.38529	0.45755				0.33667	0.0074498	0.3518
ACAELHQNVNVK	1381.68	IPI00018931	Vacuolar protein sorting-associated protein 35;Vesicle protein sorting 35;Maternal-embryonic 3;Vacuolar protein sorting 35 variant;Putative uncharacterized protein DKFZp686O2462	9.622e-20	0.49558		0.89505	1.0969	1.147	0.77072	0.7204		0.39217
ACAGLLTVCLLR	1345.72	IPI00102440	N-terminal EF-hand calcium-binding protein 3;Amyloid beta A4 protein-binding family A member 2-binding protein;Neuronal calcium-binding protein 3;X11L-binding protein 51;Nek2-interacting protein 1	0.0092317	0.58797
ACALQVLSAILEGSK	1558.84	IPI00464999	HEAT repeat-containing protein 6;Amplified in breast cancer protein 1;HEATR6 protein	8.1065e-77	16.938	9.1447	10.2			0.86075	7.1721	8.0351	7.2477
ACALSIEESCRPGDK	1691.76	IPI00217143	SDHA protein;Succinate dehydrogenase [ubiquinone] flavoprotein subunit, mitochondrial;Flavoprotein subunit of complex II;cDNA FLJ76840, highly similar to Homo sapiens succinate dehydrogenase complex, subunit A, flavoprotein (Fp) (SDHA), mRNA;Succinate dehydrogenase complex, subunit A, flavoprotein (Fp), isoform CRA_b;cDNA FLJ37560 fis, clone BRCOC2000333, highly similar to Succinate dehydrogenase…	0.0026593	0.9551				0.37591				0.7795
ACANPAAGSVILLENLR	1767.93	IPI00169383	Phosphoglycerate kinase 1;Primer recognition protein 2;Cell migration-inducing gene 10 protein;Phosphoglycerate kinase	1.0094e-115	0.36841	0.43646	0.54356	0.80146	0.72208	0.6342	0.5405	0.39825	0.44384
ACARPLISVYSEK	1492.77	IPI00003918	60S ribosomal protein L4;L1;cDNA FLJ78454, highly similar to Homo sapiens ribosomal protein L4 (RPL4), mRNA;Ribosomal protein L4, isoform CRA_c;cDNA FLJ78445, highly similar to Homo sapiens ribosomal protein L4 (RPL4), mRNA;cDNA FLJ56689, highly similar to 60S ribosomal protein L4;Ribosomal protein L4 variant;cDNA FLJ50996, highly similar to 60S ribosomal protein L4;cDNA FLJ51018, highly similar …	3.6459e-34	1.1685	1.4619	1.3749	1.0654	2.0555	1.2458	0.90377	0.76274	1.1058
ACARPLISVYSEKGESSGK	2038.02	IPI00003918	60S ribosomal protein L4;L1;cDNA FLJ78454, highly similar to Homo sapiens ribosomal protein L4 (RPL4), mRNA;Ribosomal protein L4, isoform CRA_c;cDNA FLJ78445, highly similar to Homo sapiens ribosomal protein L4 (RPL4), mRNA;cDNA FLJ56689, highly similar to 60S ribosomal protein L4;Ribosomal protein L4 variant;cDNA FLJ50996, highly similar to 60S ribosomal protein L4;cDNA FLJ51018, highly similar …	1.0136e-28		1.4967	1.2666			1.1968			0.81462
ACCISTGGHSQCSESLPVR	2104.91	IPI00217490	Fibronectin type III domain-containing protein 3B;Factor for adipocyte differentiation 104;HCV NS5A-binding protein 37;Fibronectin type III domain containing 3B, isoform CRA_e;cDNA FLJ45929 fis, clone PLACE7000266, highly similar to Homo sapiens fibronectin type III domain containing 3B (FNDC3B), mRNA	1.9137e-38	0.54209		0.46997						0.35708
ACCPLEGVRPSPQQTEYR	2146.99	IPI00878912	Putative uncharacterized protein TRMT2A;tRNA (uracil-5-)-methyltransferase homolog A;HpaII tiny fragments locus 9c protein	0.23206	0.62877			0.78048
ACDCDFR	942.332	IPI00299404	Laminin subunit beta-3;Laminin 5 beta 3;Laminin B1k chain;Kalinin B1 chain	0.011524
ACDELVEEMEHYGK	1708.71	IPI00337495	Procollagen-lysine,2-oxoglutarate 5-dioxygenase 2;Lysyl hydroxylase 2;cDNA FLJ55329, highly similar to Procollagen-lysine,2-oxoglutarate5-dioxygenase 2 (EC 1.14.11.4);Procollagen-lysine, 2-oxoglutarate 5-dioxygenase 2 isoform b variant;PLOD2 protein;cDNA FLJ43712 fis, clone TESOP2004114, highly similar to Homo sapiens procollagen-lysine, 2-oxoglutarate 5-dioxygenase 2 (PLOD2), transcript variant …	2.1451e-10			0.53809						0.51123
ACDFLLSR	980.475	IPI00009747	Lanosterol synthase;Oxidosqualene--lanosterol cyclase;2,3-epoxysqualene--lanosterol cyclase;cDNA, FLJ92849, highly similar to Homo sapiens lanosterol synthase (2,3-oxidosqualene-lanosterol cyclase) (LSS), mRNA;cDNA FLJ58192, highly similar to Lanosterol synthase (EC 5.4.99.7)	0.00035261								0.17083	0.17286
ACDGNVDHAATHITNR	1750.78	IPI00157365	NEDD8 ultimate buster 1;Negative regulator of ubiquitin-like proteins 1;Renal carcinoma antigen NY-REN-18	2.2979e-37	2.4417	1.8541	1.9859		1.7111	2.8828	1.8176		1.763
ACDGNVDHAATHITNRR	1906.88	IPI00157365	NEDD8 ultimate buster 1;Negative regulator of ubiquitin-like proteins 1;Renal carcinoma antigen NY-REN-18	0.017946		3.1156	1.7234			2.5325	3.4126	2.2051	1.7465
ACDILAIDK	1017.52	IPI00010882	DNA fragmentation factor subunit alpha;DNA fragmentation factor 45 kDa subunit;Inhibitor of CAD;DNAation factor, 45kDa, alpha polypeptide isoform 1 variant;DNAation factor, 45kDa, alpha polypeptide;DNAation factor, 45kDa, alpha polypeptide, isoform CRA_c;cDNA, FLJ93833, Homo sapiens DNAation factor, 45kDa, alpha polypeptide(DFFA), mRNA;DNAation factor, 45kDa, alpha polypeptide, isoform CRA_b	0.00013843		1.1682	1.1173			3.0085	0.29877	0.68751	0.68841
ACDLGHIWACANASR	1700.75	IPI00303753	Hcp beta-lactamase-like protein C1orf163	3.4511e-67	1.6415	0.8995	0.87203	0.5462	0.18247				1.0822
ACDSVTSNVLPLLLEQFHK	2170.11	IPI00154451	cDNA FLJ55586, highly similar to MMS19-like protein;MMS19 nucleotide excision repair protein homolog;MMS19-like protein;MET18 homolog;cDNA FLJ31682 fis, clone NT2RI2005335, highly similar to MMS19-like protein;cDNA FLJ54519, highly similar to MMS19-like protein;MMS19 nucleotide excision repair homolog (S. cerevisiae)	1.6961e-13			0.82244			0.85154		0.72513	0.6998
ACEFAGFQCQIQFGPHNEQK	2395.05	IPI00298994	Talin-1;Talin 1	7.4919e-72	0.25482								0.19028
ACEHHAPLPSHLISEIK	1937.98	IPI00386747	Codanin-1	0.25563		1.1045
ACEIRDQITSK	1319.65	IPI00549205	DNA repair protein RAD50;RAD50 homolog (S. cerevisiae);RAD50 homolog (S. cerevisiae), isoform CRA_b;RAD50 protein;cDNA FLJ75532, highly similar to Homo sapiens RAD50 homolog (S. cerevisiae) (RAD50), transcript variant 1, mRNA	1		2.7777					0.62601	0.89156
ACEPGVDYVYK	1299.58	CON_00713505	Complement C3;C3 and PZP-like alpha-2-macroglobulin domain-containing protein 1;Complement C3 beta chain;Complement C3 alpha chain;C3a anaphylatoxin;Complement C3b alpha' chain;Complement C3c alpha' chain fragment 1;Complement C3dg fragment;Complement C3g fragment;Complement C3d fragment;Complement C3f fragment;Complement C3c alpha' chain fragment 2;Complement component 3;Complement component 3, …	5.5434e-05					0.067352
ACFGGLFANLIRPGDAK	1805.92	IPI00299635	Baculoviral IAP repeat-containing protein 6;Ubiquitin-conjugating BIR domain enzyme apollon;cDNA FLJ13786 fis, clone PLACE4000654, highly similar to Mus musculus ubiquitin conjugating enzyme;cDNA FLJ13726 fis, clone PLACE3000059, highly similar to Mus musculus ubiquitin conjugating enzyme	0.00084319						0.97995		0.91276	0.50222
ACFHCETCK	1211.45	IPI00000861	LIM and SH3 domain protein 1;MLN 50;cDNA FLJ76601, highly similar to Homo sapiens LIM and SH3 protein 1 (LASP1), mRNA;cDNA FLJ52195, highly similar to LIM and SH3 domain protein 1;cDNA FLJ58065, highly similar to LIM and SH3 domain protein 1	1			0.96347						0.45764
ACFTMDPK	968.41	IPI00893918	Valyl-tRNA synthetase;Valine--tRNA ligase;Protein G7a;Valyl-tRNA synthetase, isoform CRA_a;cDNA FLJ50305, highly similar to Valyl-tRNA synthetase (EC 6.1.1.9)	0.23448			0.59396			0.35813			0.75106
ACFTQWLCHLHNEVNR	2083.95	IPI00902969	FAD-linked sulfhydryl oxidase ALR;Augmenter of liver regeneration;Hepatopoietin;Hepatopoietin HPO1;Hepatopoietin HPO2	0.020383		1.8914						1.3829
ACGDSTLTQITAGLDPVGR	1930.94	IPI00003348	Guanine nucleotide-binding protein G(I)/G(S)/G(T) subunit beta-2;Transducin beta chain 2;G protein subunit beta-2;GNB2 protein;cDNA FLJ77321, highly similar to Homo sapiens guanine nucleotide binding protein (G protein), beta polypeptide 2 (GNB2), mRNA;Guanine nucleotide binding protein (G protein), beta polypeptide 2, isoform CRA_a	1.1939e-103	2.5128	1.9095	2.243	0.93627	0.80472	1.1586	1.3033	1.683	1.7619
ACGLNFADLMAR	1337.62	IPI00156689	Synaptic vesicle membrane protein VAT-1 homolog;cDNA FLJ75120, highly similar to Homo sapiens vesicle amine transport protein 1 homolog (T californica) (VAT1), mRNA;Vesicle amine transport protein 1 homolog (T californica), isoform CRA_a;cDNA, FLJ79487, highly similar to Synaptic vesicle membrane protein VAT-1homolog;cDNA FLJ39753 fis, clone SMINT2018343, highly similar to Synaptic vesicle membra…	2.2374e-27	0.76715	1.1301	0.45525	1.0152	1.7891	1.1223	0.46771	0.32333	0.13241
ACGLVASNLNLK	1258.67	IPI00219219	Galectin-1;Lectin galactoside-binding soluble 1;Beta-galactoside-binding lectin L-14-I;S-Lac lectin 1;Galaptin;14 kDa lectin;HPL;HBL;Putative MAPK-activating protein PM12;Beta-galactoside-binding lectin;Lectin, galactoside-binding, soluble, 1 (Galectin 1);cDNA, FLJ92447, Homo sapiens lectin, galactoside-binding, soluble, 1 (galectin 1)(LGALS1), mRNA;HL14 protein	1.9337e-34	0.11842	0.10625		2.1785	2.7399		0.18783	0.15292
ACGLVASNLNLKPGECLR	1971	IPI00219219	Galectin-1;Lectin galactoside-binding soluble 1;Beta-galactoside-binding lectin L-14-I;S-Lac lectin 1;Galaptin;14 kDa lectin;HPL;HBL;Putative MAPK-activating protein PM12;Beta-galactoside-binding lectin;Lectin, galactoside-binding, soluble, 1 (Galectin 1);cDNA, FLJ92447, Homo sapiens lectin, galactoside-binding, soluble, 1 (galectin 1)(LGALS1), mRNA;HL14 protein	1.9014e-164	0.12263	0.10848	0.068921	1.3348	3.692	2.6068	0.20188	0.15576	0.085185
ACGNFGIPCELR	1392.63	IPI00815732	Multifunctional protein ADE2;Phosphoribosylaminoimidazole-succinocarboxamide synthase;SAICAR synthetase;Phosphoribosylaminoimidazole carboxylase;AIR carboxylase;Putative uncharacterized protein DKFZp781N1372	1.5141e-09	0.43907	0.52011	0.44274	1.0185	1.1824	1.0119	1.066	0.90929	0.98903
ACGNMFGLMHGTCPETSGGLLICLPR	2848.3	IPI00029056	Selenide, water dikinase 1;Selenophosphate synthetase 1;Selenium donor protein 1;cDNA FLJ57394, highly similar to Selenide, water dikinase 1 (EC 2.7.9.3);cDNA FLJ60186, highly similar to Selenide, water dikinase 1 (EC 2.7.9.3)	2.2834e-39		1.0404					2.7332	2.1214
ACGSEIMQK	1022.45	IPI00013933	Desmoplakin;250/210 kDa paraneoplastic pemphigus antigen	0.10105			0.62204						0.37293
ACGVLETIR	1017.53	IPI00220154	Myosin-Vb;Myosin-Vc;MYO5C protein;HSPC089;Myosin-Va;Dilute myosin heavy chain, non-muscle;Myosin heavy chain 12;Myoxin;Myosin V;Putative uncharacterized protein MYO5A;MYO5A variant protein;cDNA FLJ50342, highly similar to Myosin-5A;Myosin Va;Myosin Va variant	0.0049144				1.1362			1.7014		0.99274
ACGYVVCWK	1141.5	IPI00065435	FYVE, RhoGEF and PH domain-containing protein 4;Actin filament-binding protein frabin;FGD1-related F-actin-binding protein;Zinc finger FYVE domain-containing protein 6;cDNA FLJ55905, highly similar to FYVE, RhoGEF and PH domain-containing protein 4;cDNA FLJ56188, highly similar to FYVE, RhoGEF and PH domain-containing protein4;FGD4 protein	0.0012138
ACIDSNEDGDLSK	1422.59	IPI00020416	Tripeptidyl-peptidase 2;Tripeptidyl-peptidase II;Tripeptidyl aminopeptidase;cDNA FLJ61714, highly similar to Tripeptidyl-peptidase 2 (EC 3.4.14.10);Tripeptidyl peptidase II	2.509e-19	0.4525		0.50897			0.84294	0.68699	0.37681	0.30572
ACIGDTLCQK	1164.53	IPI00023647	Ubiquitin-like modifier-activating enzyme 6;Ubiquitin-activating enzyme E1-like protein 2;Monocyte protein 4;cDNA FLJ36845 fis, clone ASTRO2013050, weakly similar to UBIQUITIN-ACTIVATING ENZYME E1	3.078e-11			0.76449	1.0418		0.89779	0.38479	0.37756	0.27379
ACINTLQFLYSR	1484.74	IPI00872454	Chromosome transmission fidelity protein 18 homolog;CTF18, chromosome transmission fidelity factor 18 homolog (S. cerevisiae);Protein CTF18 homolog.;CTF18, chromosome transmission fidelity factor 18 homolog (S. cerevisiae), isoform CRA_d	0.0004344			1.6348					2.209	0.56387
ACLDHLAPDSK	1225.58	IPI00328905	Ras GTPase-activating-like protein IQGAP3;IQ motif containing GTPase activating protein 3	0.044919			0.45365					0.86565	4.3333
ACLDTAVENMPSLK	1547.73	IPI00026781	Fatty acid synthase;[Acyl-carrier-protein] S-acetyltransferase;[Acyl-carrier-protein] S-malonyltransferase;3-oxoacyl-[acyl-carrier-protein] synthase;3-oxoacyl-[acyl-carrier-protein] reductase;3-hydroxypalmitoyl-[acyl-carrier-protein] dehydratase;Enoyl-[acyl-carrier-protein] reductase;Oleoyl-[acyl-carrier-protein] hydrolase;FASN protein	5.7935e-64	3.0274	4.7396	3.3296	1.003	0.55395	0.70642	1.4837	1.3335	1.4694
ACLDYPVTSVLPPASLCK	1989.99	IPI00023974	Pituitary tumor-transforming gene 1 protein-interacting protein;Pituitary tumor-transforming gene protein-binding factor;cDNA FLJ78227, highly similar to Homo sapiens pituitary tumor-transforming 1 interacting protein (PTTG1IP), mRNA;Pituitary tumor-transforming 1 interacting protein, isoform CRA_a;cDNA, FLJ96710, Homo sapiens pituitary tumor-transforming 1 interacting protein(PTTG1IP), mRNA;Puta…	3.2302e-77	0.13217	0.17364	0.097852						0.096399
ACLENLGLK	1016.53	IPI00783625	Serpin B5;Protease inhibitor 5;Maspin;cDNA FLJ57640, highly similar to Serpin B5	8.7376e-24	0.020345		0.017559				0.0023556	0.001104	0.0022682
ACLISLGYDIGNDPQGEAEFAR	2395.11	IPI00013508	Alpha-actinin-1;Alpha-actinin cytoskeletal isoform;Non-muscle alpha-actinin-1;F-actin cross-linking protein;cDNA FLJ54432, highly similar to Alpha-actinin-1;Alpha-actinin 1	1.8904e-204			0.25395			3.3066			0.18598
ACLISLGYDVENDR	1623.76	IPI00013808	Alpha-actinin-4;Non-muscle alpha-actinin 4;F-actin cross-linking protein;ACTN4 protein;Actinin alpha4 isoform	1.0768e-53			0.17323						0.25125
ACLISLGYDVENDRQGEAEFNR	2555.17	IPI00013808	Alpha-actinin-4;Non-muscle alpha-actinin 4;F-actin cross-linking protein;ACTN4 protein;Actinin alpha4 isoform	8.7868e-30	0.18032		0.16355		0.59616				0.24769
ACLKYPEWK	1193.59	IPI00186008	PCTP-like protein;StAR-related lipid transfer protein 10;START domain-containing protein 10;Serologically defined colon cancer antigen 28;Antigen NY-CO-28;cDNA FLJ38349 fis, clone FEBRA1000057, highly similar to PCTP-like protein	0.1114					0.034327	0.73676
ACLLCSLVK	1062.56	IPI00002895	Transcription elongation factor SPT4;DRB sensitivity-inducing factor small subunit;DSIF p14;Suppressor of Ty 4 homolog 1 (S. cerevisiae), isoform CRA_a;cDNA, FLJ92259, Homo sapiens suppressor of Ty 4 homolog 1 (S. cerevisiae)(SUPT4H1), mRNA	0.0097877						1.1948		1.7387
ACLLETPIR	1071.57	IPI00795553	Armadillo repeat-containing protein 8;cDNA FLJ56387, highly similar to Mus musculus armadillo repeat containing 8 (Armc8), mRNA	0.00011104		0.39601
ACLWGTGCVAGVLLQPSGAK	2044.02	IPI00010951	Epiplakin;450 kDa epidermal antigen;Putative uncharacterized protein DKFZp434G0719	2.7882e-189	0.72276	0.71532	0.85245			3.6516	2.362		3.6336
ACLYAGVK	880.448	IPI00010130	Glutamine synthetase;Glutamate--ammonia ligase;cDNA FLJ57219, highly similar to Glutamine synthetase (EC 6.3.1.2)	0.095697									0.032692
ACMLTTATAHDGDVNVISWSR	2304.06	IPI00027831	Glutamate-rich WD repeat-containing protein 1;CDW4/GRWD1;Glutamate-rich WD repeat containing 1;cDNA, FLJ96709, highly similar to Homo sapiens glutamate rich WD repeat protein GRWD (GRWD), mRNA;cDNA FLJ90195 fis, clone MAMMA1001310;Putative uncharacterized protein DKFZp564C172;cDNA FLJ52246, moderately similar to Glutamate-rich WD repeat-containing protein 1	8.8385e-24	0.86443	0.79307			1.0632
ACMVGHVDFK	1162.53	IPI00299635	Baculoviral IAP repeat-containing protein 6;Ubiquitin-conjugating BIR domain enzyme apollon;cDNA FLJ13786 fis, clone PLACE4000654, highly similar to Mus musculus ubiquitin conjugating enzyme;cDNA FLJ13726 fis, clone PLACE3000059, highly similar to Mus musculus ubiquitin conjugating enzyme	0.13425									1.3207
ACNAIEDAQSTR	1334.59	IPI00465428	Vacuolar protein sorting-associated protein 13C;cDNA FLJ41857 fis, clone NT2RI3006284, highly similar to Homo sapiens vacuolar protein sorting 13C (VPS13C), transcript variant 2A, mRNA;cDNA FLJ56392, highly similar to Homo sapiens vacuolar protein sorting 13C (VPS13C), transcript variant 2A, mRNA	0.026099			0.18331						0.9096
ACNCNPMGSEPVGCR	1707.66	IPI00015117	Laminin subunit gamma-2;Laminin 5 gamma 2 subunit;Kalinin/nicein/epiligrin 100 kDa subunit;Laminin B2t chain;Cell-scattering factor 140 kDa subunit;Large adhesive scatter factor 140 kDa subunit;Ladsin 140 kDa subunit;Laminin, gamma 2;cDNA FLJ57342, highly similar to Laminin gamma-2 chain;Laminin, gamma 2, isoform CRA_a	8.5458e-31									0.22653
ACNPLDAGPMVVHCSAGVGR	2066.94	IPI00107831	Receptor-type tyrosine-protein phosphatase F;Leukocyte common antigen related;Protein tyrosine phosphatase, receptor type, F isoform 2 variant;cDNA FLJ43335 fis, clone NT2RI3006673, highly similar to Receptor-type tyrosine-protein phosphatase F (EC 3.1.3.48);Putative uncharacterized protein DKFZp686B1310;cDNA FLJ45062 fis, clone BRAWH3024186, highly similar to Receptor-type tyrosine-protein phosp…	1.9054e-31	0.6934
ACNPQPNGENAISAR	1597.73	IPI00169285	Putative phospholipase B-like 2;Phospholipase B domain-containing protein 2;Lamina ancestor homolog 2;LAMA-like protein 2;76 kDa protein;p76;Putative phospholipase B-like 2 32 kDa form;Putative phospholipase B-like 2 45 kDa form	8.1065e-77							0.65072
ACPCPHTNSFATGCVVNGGDVR	2375.02	IPI00377045	Laminin alpha-3 chain variant 1;Alpha3A;Laminin alpha-3 chain variant 2;Laminin subunit alpha-3;Epiligrin 170 kDa subunit;Nicein subunit alpha;Laminin alpha 3b chain;Laminin alpha 3b chain variant;Laminin alpha 3 splice variant a;LAMA3 protein;Epiligrin alpha 3 subunit;Laminin alpha 3 splice variant b2	4.0203e-23							0.0037896		0.066765
ACPDSLGSPAPSHAYHGGVL	1991.92	IPI00395839	Anoctamin-1;Transmembrane protein 16A;Discovered on gastrointestinal stromal tumors protein 1;Oral cancer overexpressed protein 2;Tumor amplified and overexpressed sequence 2;ANO1 protein;cDNA FLJ10261 fis, clone HEMBB1000975;cDNA FLJ54976, highly similar to Homo sapiens transmembrane protein 16A (TMEM16A), mRNA	0.005549
ACPHVWFER	1200.55	IPI00140301	Glycerol-3-phosphate acyltransferase 3;1-acylglycerol-3-phosphate O-acyltransferase 9;Lysophosphatidic acid acyltransferase theta;Acyl-CoA:glycerol-3-phosphate acyltransferase 3;Lung cancer metastasis-associated protein 1;MAG-1	1			0.15148				0.5547
ACPLDQAIGLLVAIFHK	1865.02	IPI00027463	Protein S100-A6;S100 calcium-binding protein A6;Calcyclin;Prolactin receptor-associated protein;Growth factor-inducible protein 2A9;MLN 4;cDNA, FLJ92369, highly similar to Homo sapiens S100 calcium binding protein A6 (calcyclin) (S100A6),mRNA	4.2264e-101	0.11271	0.091227	0.16105	15.977			0.058444	0.075442
ACPLEKALDVMVSTFHK	1944.98	IPI00032313	Protein S100-A4;S100 calcium-binding protein A4;Metastasin;Protein Mts1;Placental calcium-binding protein;Calvasculin;cDNA FLJ76571, highly similar to Homo sapiens S100 calcium binding protein A4 (calcium protein, calvasculin, metastasin, murine placental homolog) (S100A4), transcript variant 1, mRNA;S100 calcium binding protein A4 (Calcium protein, calvasculin, metastasin, murine placental homol…	1.3344e-24			0.061489
ACPQIVTALTLLNR	1568.87	IPI00028980	Unhealthy ribosome biogenesis protein 2 homolog;cDNA FLJ75337;URB2 protein	0.135						0.46873			1.8049
ACPRPEGLNFQDLK	1643.81	IPI00646500	Replication protein A 32 kDa subunit;RP-A p34;Replication factor A protein 2;cDNA, FLJ93412, highly similar to Homo sapiens replication protein A2, 32kDa (RPA2), mRNA;cDNA FLJ61154, highly similar to Replication protein A 32 kDa subunit;cDNA FLJ57152, highly similar to Replication protein A 32 kDa subunit;cDNA FLJ51490, highly similar to Replication protein A 32 kDa subunit;Replication protein A2…	1.8407e-21	0.82479	0.73538	0.77212	2.4263	2.9888		1.2971	1.3204	1.2687
ACQALGAMLSK	1148.57	IPI00164949	Negative elongation factor C/D;TH1-like protein	5.4093e-10							2.6573
ACQSIYPLHDVFVR	1703.85	IPI00419880	40S ribosomal protein S3a;cDNA FLJ78591, highly similar to Homo sapiens ribosomal protein S3A (RPS3A), mRNA;Ribosomal protein S3A, isoform CRA_d;cDNA, FLJ92049, Homo sapiens ribosomal protein S3A (RPS3A), mRNA;cDNA FLJ51870, highly similar to 40S ribosomal protein S3a;Ribosomal protein S3A	5.7935e-64	1.3241	1.2941	1.2578	1.1616	1.365	1.2903	0.95954	0.79857	0.89761
ACQSIYPLHDVFVRK	1831.94	IPI00419880	40S ribosomal protein S3a;cDNA FLJ78591, highly similar to Homo sapiens ribosomal protein S3A (RPS3A), mRNA;Ribosomal protein S3A, isoform CRA_d;cDNA, FLJ92049, Homo sapiens ribosomal protein S3A (RPS3A), mRNA;cDNA FLJ51870, highly similar to 40S ribosomal protein S3a;Ribosomal protein S3A	1.5722e-10	2.1635	1.4398	1.582	1.5645	1.5989	1.2872	0.90479		1.3384
ACSPAASEITGLSTAVLAAHGR	2139.07	IPI00220019	Three prime repair exonuclease 1;3'-5' exonuclease TREX1;DNase III;TREX1 protein;Three prime repair exonuclease 1, isoform CRA_g	4.5044e-07			0.032013						0.0072964
ACSVIFPLIYSEMK	1656.83	IPI00291544	Squalene monooxygenase;Squalene epoxidase;cDNA FLJ51555, highly similar to Squalene monooxygenase (EC 1.14.99.7);cDNA FLJ51554, highly similar to Squalene monooxygenase (EC 1.14.99.7);Putative uncharacterized protein DKFZp686B0215;cDNA, FLJ93917, highly similar to Homo sapiens squalene epoxidase (SQLE), mRNA	4.1974e-45	1.7546	0.44286	3.2118			0.95435	1.3216	0.8428	3.076
ACTILLR	845.479	IPI00553185	T-complex protein 1 subunit gamma;CCT-gamma;cDNA FLJ57603, highly similar to T-complex protein 1 subunit gamma;cDNA, FLJ78822, highly similar to T-complex protein 1 subunit gamma;cDNA, FLJ79286, highly similar to T-complex protein 1 subunit gamma;PIG48;Chaperonin containing TCP1, subunit 3 (Gamma) variant;cDNA FLJ44436 fis, clone UTERU2019706, highly similar to T-complex protein 1 subunit gamma;C…	0.20494		0.39851				0.65432	0.68526
ACVGLPPQNHMLLEHK	1842.92	IPI00549569	Inositol-3-phosphate synthase 1;Myo-inositol-1-phosphate synthase;Myo-inositol 1-phosphate synthase A1;cDNA FLJ34860 fis, clone NT2NE2012790, highly similar to Homo sapiens myo-inositol 1-phosphate synthase A1 (ISYNA1), mRNA;cDNA FLJ36142 fis, clone TESTI2025006, highly similar to Homo sapiens myo-inositol 1-phosphate synthase A1 (ISYNA1), mRNA;cDNA FLJ57998, highly similar to Homo sapiens myo-in…	0.032255	0.15246	2.87	0.84735	7.7198				2.9273	7.4382
ACVMMQGR	951.409	IPI00017672	Purine nucleoside phosphorylase;Inosine phosphorylase;cDNA FLJ25678 fis, clone TST04067, highly similar to PURINE NUCLEOSIDE PHOSPHORYLASE (EC 2.4.2.1);PRO1837	0.61652						0.5303
ACVQGECGVCHYCR	1754.67	IPI00166009	Lysine-specific demethylase 2A;JmjC domain-containing histone demethylation protein 1A;[Histone-H3]-lysine-36 demethylase 1A;F-box/LRR-repeat protein 11;F-box and leucine-rich repeat protein 11;F-box protein FBL7;F-box protein Lilina;CXXC-type zinc finger protein 8;cDNA FLJ51294, highly similar to JmjC domain-containing histone demethylation protein 1A (EC 1.14.11.-)	1.247e-25			1.3102			1.6866			5.8154
ACVSMLGVPVDPDTLHATLR	2151.08	IPI00179298	E3 ubiquitin-protein ligase HUWE1;HECT, UBA and WWE domain-containing protein 1;Upstream regulatory element-binding protein 1;Mcl-1 ubiquitin ligase E3;ARF-binding protein 1;Large structure of UREB1;Homologous to E6AP carboxyl terminus homologous protein 9;cDNA FLJ59294, highly similar to HECT, UBA and WWE domain-containing protein 1 (EC 6.3.2.-);HUWE1 protein;E3 ubiquitin protein ligase URE-B1 v…	3.1613e-08						0.89067			0.67342
ACVVHGSDLK	1084.53	IPI00646182	cDNA FLJ55427, highly similar to Sodium/potassium-transporting ATPase alpha-1 chain (EC 3.6.3.9);cDNA FLJ60077, highly similar to Sodium/potassium-transporting ATPase alpha-1 chain (EC 3.6.3.9);Sodium/potassium-transporting ATPase subunit alpha-1;Na(+)/K(+) ATPase alpha-1 subunit	0.0032763		1.6228	0.85929	0.98137		0.81013	2.7844		1.4153
ACWVLHYFCEVK	1610.74	IPI00007402	Importin-7;Ran-binding protein 7;cDNA FLJ14581 fis, clone NT2RM4001382, highly similar to Importin-7;cDNA FLJ14986 fis, clone Y79AA1000784, highly similar to Importin-7;cDNA FLJ90427 fis, clone NT2RP3000481, highly similar to Importin-7	0.0004344							0.87425	0.92288
ACYALENFVENLGPK	1723.82	IPI00398009	Importin-4;Importin-4b;Ran-binding protein 4;cDNA FLJ32715 fis, clone TESTI2000784, highly similar to Importin-4;Importin 4 variant;Importin 4;Importin 4, isoform CRA_a;cDNA FLJ32140 fis, clone PLACE5000058, highly similar to Importin-4;cDNA FLJ32482 fis, clone SKNMC2001324, highly similar to Importin-4;cDNA FLJ36788 fis, clone ADRGL2004451, highly similar to Importin-4;cDNA FLJ37578 fis, clone B…	8.1065e-77		2.1628	2.7338		1.5387	1.0423	0.6148	3.3135	3.6498
ACYGVLR	837.417	IPI00011253	40S ribosomal protein S3;Ribosomal protein S3;cDNA, FLJ93526, Homo sapiens ribosomal protein S3 (RPS3), mRNA;Ribosomal protein S3 variant;RPS3 protein	6.2538e-06		1.3368	1.2187		1.1822	1.286	0.90109	1.3841
ACYLSINPQK	1192.59	IPI00029468	Alpha-centractin;Centrosome-associated actin homolog;Actin-RPV;ARP1;ARP1 actin-related protein 1 homolog A, centractin alpha (Yeast), isoform CRA_a;cDNA, FLJ92870, Homo sapiens ARP1 actin-related protein 1 homolog A, centractinalpha (yeast) (ACTR1A), mRNA;cDNA FLJ52695, highly similar to Alpha-centractin;cDNA FLJ52800, highly similar to Alpha-centractin;cDNA FLJ55002, highly similar to Alpha-cent…	0.0041865	0.61907	0.70964		0.7072	0.67269		0.43055
ACYLSINPQKDETLETEK	2138.02	IPI00029468	Alpha-centractin;Centrosome-associated actin homolog;Actin-RPV;ARP1;ARP1 actin-related protein 1 homolog A, centractin alpha (Yeast), isoform CRA_a;cDNA, FLJ92870, Homo sapiens ARP1 actin-related protein 1 homolog A, centractinalpha (yeast) (ACTR1A), mRNA;cDNA FLJ52695, highly similar to Alpha-centractin;cDNA FLJ52800, highly similar to Alpha-centractin;cDNA FLJ55002, highly similar to Alpha-cent…	4.5319e-05			0.58639			0.67662			0.274
ADAAPQLGK	869.461	IPI00335385	Scavenger mRNA-decapping enzyme DcpS;DCS-1;Hint-related 7meGMP-directed hydrolase;Histidine triad protein member 5;mRNA decapping enzyme variant	0.023472			0.69914			0.91614
ADAAPQLGKR	1025.56	IPI00335385	Scavenger mRNA-decapping enzyme DcpS;DCS-1;Hint-related 7meGMP-directed hydrolase;Histidine triad protein member 5;mRNA decapping enzyme variant	0.0032763			0.77879						1.0759
ADAASQVLLGSGLTILSQPLMYVK	2474.35	IPI00003833	Mitochondrial carrier homolog 2;Met-induced mitochondrial protein;Mitochondrial carrier homolog 2 (C. elegans);cDNA, FLJ93503, Homo sapiens mitochondrial carrier homolog 2 (C. elegans) (MTCH2),nuclear gene encoding mitochondrial protein, mRNA;cDNA FLJ51849, highly similar to Mitochondrial carrier homolog 2;Mitochondrial carrier homolog 2 variant	7.647e-201	1.2235		1.1862		0.29023	0.72583	0.95422	0.87256	1.11
ADAASSLTVDVTPPTAK	1642.84	IPI00743931	Golgi reassembly-stacking protein 2;Golgi reassembly-stacking protein of 55 kDa;p59;Golgi phosphoprotein 6;cDNA FLJ59712, highly similar to Golgi reassembly-stacking protein 2;cDNA FLJ55810, highly similar to Golgi reassembly-stacking protein 2;cDNA FLJ55232, highly similar to Golgi reassembly-stacking protein 2;Golgi reassembly stacking protein 2, 55kDa, isoform CRA_c;Putative uncharacterized pr…	1.6781e-12	3.5602	3.1561			0.91002	0.59295
ADAECYTAMK	1158.47	IPI00026942	Erlin-2;Endoplasmic reticulum lipid raft-associated protein 2;Stomatin-prohibitin-flotillin-HflC/K domain-containing protein 2	1.1689e-09		0.70888	0.63242			0.66847
ADAEEEAATR	1061.46	IPI00302712	Cytoplasmic dynein 1 intermediate chain 2;Cytoplasmic dynein intermediate chain 2;Dynein intermediate chain 2, cytosolic;DH IC-2;cDNA FLJ53290, highly similar to Cytoplasmic dynein 1 intermediate chain 2;Dynein, cytoplasmic, intermediate polypeptide 2 variant;cDNA FLJ55471, highly similar to Cytoplasmic dynein 1 intermediate chain 2;CDNA: FLJ22921 fis, clone KAT06711;cDNA, FLJ79018, highly simila…	0.012569			0.3698
ADAEEGIFEIK	1220.59	IPI00097495	TBC1 domain family member 2A;Prostate antigen recognized and identified by SEREX;PARIS-1;cDNA FLJ56222, highly similar to TBC1 domain family member 2;TBC1 domain family, member 2A;TBC1 domain family, member 2, isoform CRA_c;Putative uncharacterized protein pp8997;Putative uncharacterized protein;TBC1 domain family, member 2;TBC1 domain family, member 2, isoform CRA_d;cDNA FLJ16244 fis, clone HCHO…	1		1.4171
ADAEGESDLENSRK	1519.67	IPI00298994	Talin-1;Talin 1	7.9709e-16		0.38726	0.23821				0.31363		0.16918
ADAENAMR	876.376	IPI00183500	Nuclear cap-binding protein subunit 2;20 kDa nuclear cap-binding protein;NCBP 20 kDa subunit;NCBP-interacting protein 1;Cell proliferation-inducing gene 55 protein;Nuclear cap binding protein subunit 2, 20kDa, isoform CRA_d;cDNA, FLJ96704, Homo sapiens nuclear cap binding protein subunit 2, 20kDa (NCBP2), mRNA;cDNA FLJ52508, highly similar to Nuclear cap-binding protein subunit 2;cDNA FLJ52517, h…	1									2.129
ADAETLRK	902.482	IPI00329801	Annexin A5;Annexin-5;Annexin V;Lipocortin V;Endonexin II;Calphobindin I;Placental anticoagulant protein I;Placental anticoagulant protein 4;Thromboplastin inhibitor;Vascular anticoagulant-alpha;Anchorin CII;cDNA FLJ52002, highly similar to Annexin A5;ANXA5 protein;Annexin A5, isoform CRA_b;Putative uncharacterized protein ANXA5;cDNA, FLJ93030, Homo sapiens annexin A5 (ANXA5), mRNA	0.095697								0.46248	0.29645
ADAEVIILPK	1067.62	IPI00221394	H/ACA ribonucleoprotein complex subunit 4;Dyskerin;Nucleolar protein family A member 4;snoRNP protein DKC1;Nopp140-associated protein of 57 kDa;Nucleolar protein NAP57;CBF5 homolog	1.0307e-05	1.4722	2.1655	1.2876			0.63812
ADAGFVYSEAVASHYMR	1872.85	IPI00514301	Peripheral plasma membrane protein CASK;Calcium/calmodulin-dependent serine protein kinase;Lin-2 homolog;Putative uncharacterized protein CASK;Calcium/calmodulin-dependent serine protein kinase (MAGUK family)	0.017946	1.5652				0.63063				0.88342
ADAGHAGVSANMMK	1358.61	IPI00550655	Spindlin-1;Ovarian cancer-related protein;cDNA FLJ78312, highly similar to Homo sapiens spindlin, mRNA;cDNA FLJ78729;Spindlin, isoform CRA_a;cDNA, FLJ79503, highly similar to Spindlin-1;cDNA FLJ34698 fis, clone MESAN2002147, highly similar to Spindlin-1	0.00071338			1.0815			1.5062			2.9133
ADAHEEDELR	1183.51	IPI00154668	Coiled-coil domain-containing protein 93;Putative uncharacterized protein FLJ10996;cDNA FLJ76711, highly similar to Homo sapiens coiled-coil domain containing 93, mRNA;Putative uncharacterized protein CCDC93	0.012569			0.93035						0.71
ADAHLGSSSVALPK	1351.71	IPI00168878	Torsin-1A-interacting protein 2;Lumenal domain-like LAP1	1.8013e-06	0.82963	1.4846	0.8824	0.79208	0.69404	0.74184			0.7095
ADALQAGASQFETSAAK	1664.8	IPI00549343	Putative uncharacterized protein VAMP2;Vesicle-associated membrane protein 2;Synaptobrevin-2;Vesicle-associated membrane protein 2 (Synaptobrevin 2);cDNA FLJ76510, highly similar to Homo sapiens vesicle-associated membrane protein 2 (synaptobrevin 2), mRNA;Vesicle-associated membrane protein 2 (Synaptobrevin 2), isoform CRA_b;Vesicle-associated membrane protein 3;Synaptobrevin-3;Cellubrevin;Putat…	3.3382e-73		0.70279		0.93847					0.2765
ADALYPVVSAASICAK	1634.83	IPI00290192	Ribonuclease H2 subunit A;Ribonuclease HI subunit A;Ribonuclease HI large subunit;RNase H(35);Aicardi-Goutieres syndrome 4 protein;Ribonuclease	2.2979e-37	0.97417
ADAPVALVVHMAPASVLVDSR	2117.13	IPI00396627	Zinc phosphodiesterase ELAC protein 2;Ribonuclease Z 2;tRNase Z 2;tRNA 3 endonuclease 2;ElaC homolog protein 2;Heredity prostate cancer protein 2;cDNA FLJ59369, highly similar to Zinc phosphodiesterase ELAC protein 2 (EC 3.1.26.11);cDNA FLJ56150, highly similar to Zinc phosphodiesterase ELAC protein 2 (EC 3.1.26.11);cDNA FLJ37014 fis, clone BRACE2010203, highly similar to Zinc phosphodiesterase E…	1.4216e-13	0.84383	0.65439	1.0613		1.106	1.7233	1.1993	1.4314	2.7369
ADATNVNNWHWTER	1712.77	IPI00030706	Activator of 90 kDa heat shock protein ATPase homolog 1;p38;AHA1, activator of heat shock 90kDa protein ATPase homolog 1 (Yeast), isoform CRA_a;cDNA, FLJ94445, Homo sapiens AHA1, activator of heat shock 90kDa protein ATPasehomolog 1 (yeast) (AHSA1), mRNA;cDNA FLJ56675, highly similar to Activator of 90 kDa heat shock protein ATPase homolog 1	1.247e-25	2.8003	1.9458	2.546	1.977	2.7179	2.9966	3.3399	2.7834	3.72
ADAVQDSEMVELVELEIR	2045	IPI00027107	Elongation factor Tu, mitochondrial;P43	3.2302e-77						0.56836
ADCASGIFLAAEK	1351.64	IPI00643591	cDNA FLJ30560 fis, clone BRAWH2004217, highly similar to AP-1 complex subunit gamma-1;cDNA FLJ46199 fis, clone TESTI4007965, highly similar to AP-1 complex subunit gamma-1;Adaptor-related protein complex 1, gamma 1 subunit;AP-1 complex subunit gamma-1;Adapter-related protein complex 1 subunit gamma-1;Adaptor protein complex AP-1 subunit gamma-1;Golgi adaptor HA1/AP1 adaptin subunit gamma-1;Gamma1…	6.9831e-28	1.8685	1.6855	1.8771	1.7871	2.4917	1.8245			1.7499
ADCLMGEFK	1069.46	IPI00021048	Myoferlin;Fer-1-like protein 3	0.0049144		0.17671	0.2598				0.3741		0.44297
ADCTITMADSDFLALMTGK	2059.93	IPI00026105	Non-specific lipid-transfer protein;Propanoyl-CoA C-acyltransferase;NSL-TP;Sterol carrier protein 2;Sterol carrier protein X;SCP-chi;SCPX;cDNA, FLJ93299, highly similar to Homo sapiens sterol carrier protein 2 (SCP2), mRNA;cDNA FLJ53982, highly similar to Nonspecific lipid-transfer protein (EC 2.3.1.176);cDNA FLJ53991, highly similar to Nonspecific lipid-transfer protein (EC 2.3.1.176);Sterol car…	9.1453e-07						0.20907
ADDADEFGYSR	1244.49	IPI00140420	Staphylococcal nuclease domain-containing protein 1;p100 co-activator;100 kDa coactivator;EBNA2 coactivator p100;Tudor domain-containing protein 11;cDNA, FLJ92620, highly similar to Homo sapiens staphylococcal nuclease domain containing 1 (SND1),mRNA;cDNA FLJ39264 fis, clone OCBBF2009603, highly similar to Staphylococcal nuclease domain-containing protein 1;EBNA-2 co-activator variant;cDNA FLJ545…	5.4093e-10	0.88762	0.8982		0.78515	0.57337	1.003	0.62789	0.56441
ADDGFHLLLMTPK	1456.74	IPI00152890	Nucleolar protein 6;Nucleolar RNA-associated protein;cDNA FLJ31997 fis, clone NT2RP7009259, highly similar to Nucleolar protein 6;cDNA FLJ58527, highly similar to Nucleolar protein 6	0.00049402	0.432				0.36955				1.2956
ADDGFHLLLMTPKPMIR	1954.02	IPI00152890	Nucleolar protein 6;Nucleolar RNA-associated protein;cDNA FLJ31997 fis, clone NT2RP7009259, highly similar to Nucleolar protein 6;cDNA FLJ58527, highly similar to Nucleolar protein 6	0.91637			1.3361
ADDGRPFPQVIK	1341.7	IPI00796333	Fructose-bisphosphate aldolase A;Muscle-type aldolase;Lung cancer antigen NY-LU-1;Fructose-bisphosphate aldolase	8.1906e-14	1.2115	1.4717	1.8174	0.84218	0.48827	0.73364	0.77165	0.7442	1.0363
ADDIDIEAMLEAPYKK	1820.89	IPI00163505	RNA-binding protein 39;RNA-binding motif protein 39;RNA-binding region-containing protein 2;Hepatocellular carcinoma protein 1;Splicing factor HCC1;RBM39 protein;cDNA FLJ59214, highly similar to RNA-binding region-containing protein 2;RNA binding motif protein 39;RNA-binding region (RNP1, RRM) containing 2, isoform CRA_a;cDNA FLJ44170 fis, clone THYMU2035319, highly similar to RNA-binding region-…	1.3222e-59		1.3729					1.1747	2.4698
ADDILDLK	901.476	IPI00871406	Conserved oligomeric Golgi complex subunit 4;Component of oligomeric Golgi complex 4;COG4 protein	0.020806			1.426			0.96612	1.3869	1.6387	1.0328
ADDKLIAEEGVDSLNVK	1814.93	IPI00017592	LETM1 and EF-hand domain-containing protein 1, mitochondrial;Leucine zipper-EF-hand-containing transmembrane protein 1	0.0011485			1.3501			0.41427			0.46833
ADDLDFETGDAGASATFPMQCSALR	2645.14	IPI00376005	Eukaryotic translation initiation factor 5A-1;Eukaryotic initiation factor 5A isoform 1;eIF-4D;Rev-binding factor;cDNA FLJ76631, highly similar to Homo sapiens eukaryotic translation initiation factor 5A (EIF5A), mRNA;Eukaryotic translation initiation factor 5A, isoform CRA_a;Eukaryotic translation initiation factor 5A-1-like;Eukaryotic initiation factor 5A isoform 1-like	6.0548e-112	0.74912	0.72975					0.72759	0.77206
ADDLDFETGDAGASATFPMQCSALRK	2773.23	IPI00376005	Eukaryotic translation initiation factor 5A-1;Eukaryotic initiation factor 5A isoform 1;eIF-4D;Rev-binding factor;cDNA FLJ76631, highly similar to Homo sapiens eukaryotic translation initiation factor 5A (EIF5A), mRNA;Eukaryotic translation initiation factor 5A, isoform CRA_a;Eukaryotic translation initiation factor 5A-1-like;Eukaryotic initiation factor 5A isoform 1-like	5.4031e-107	0.82382	0.87035	0.85801		1.8924	1.6579	0.82421	0.76264
ADDLGKGGNEESTK	1419.65	IPI00218733	Superoxide dismutase [Cu-Zn];Putative uncharacterized protein SOD1	0.63879			1.1051						1.3265
ADDLKR	716.382	IPI00030919	Mitogen-activated protein kinase scaffold protein 1;Mitogen-activated protein kinase kinase 1-interacting protein 1;MEK-binding partner 1;Mitogen-activated protein kinase kinase 1 interacting protein 1 variant	0.19963			1.7327			0.74438			0.42413
ADDLLPLGDQTQDGDFGSR	2018.92	IPI00021417	U4/U6.U5 tri-snRNP-associated protein 1;U4/U6.U5 tri-snRNP-associated 110 kDa protein;Squamous cell carcinoma antigen recognized by T cells 1;cDNA FLJ53820, highly similar to U4/U6.U5 tri-snRNP-associated protein 1;cDNA FLJ51016, highly similar to U4/U6.U5 tri-snRNP-associated protein 1	7.6146e-64	1.5623
ADDNATIR	874.414	IPI00290460	Eukaryotic translation initiation factor 3 subunit G;Eukaryotic translation initiation factor 3 subunit 4;eIF-3-delta;Eukaryotic translation initiation factor 3 RNA-binding subunit;eIF3 p44;eIF3 p42;cDNA FLJ76297, highly similar to Homo sapiens eukaryotic translation initiation factor 3, subunit 4 delta, 44kDa (EIF3S4), mRNA;EIF3S4 protein	0.37971									1.2739
ADDPLLK	770.417	IPI00335385	Scavenger mRNA-decapping enzyme DcpS;DCS-1;Hint-related 7meGMP-directed hydrolase;Histidine triad protein member 5;mRNA decapping enzyme variant	0.0017668		0.92991	0.81754			1.0543
ADDPSAADRNVEIWK	1685.8	IPI00429191	Eukaryotic peptide chain release factor subunit 1;TB3-1;Protein Cl1;Eukaryotic translation termination factor 1, isoform CRA_a;cDNA, FLJ92875, Homo sapiens eukaryotic translation termination factor 1 (ETF1),mRNA;cDNA FLJ56175, highly similar to Eukaryotic peptide chain release factor subunit1;ETF1 protein;Eukaryotic translation termination factor 1;Eukaryotic translation termination factor 1, iso…	3.0774e-24	2.0502	2.2172	1.7727		0.91304		1.2541	0.55841
ADDPSSYMEVVQAANTSGNWEELVK	2739.23	IPI00024067	Clathrin heavy chain 1;CLH-17	8.1568e-58		2.4127	0.98812			1.0366	1.3512	1.3531
ADDPYAHLSK	1115.52	IPI00873899	ATP-binding cassette sub-family F member 1;ATP-binding cassette 50;TNF-alpha-stimulated ABC protein;ATP-binding cassette sub-family F (GCN20) member 1;ATP-binding cassette, sub-family F (GCN20), member 1;ATP-binding cassette, sub-family F, member 1 variant;ABCF1 protein;cDNA FLJ56536, highly similar to ATP-binding cassette sub-family F member 1	0.20429		1.4034	0.94048		1.9856			1.7127	1.745
ADDTSAATIEK	1120.52	IPI00170786	WW domain-binding protein 11;SH3 domain-binding protein SNP70;Npw38-binding protein;cDNA FLJ58174, highly similar to WW domain-binding protein 11;cDNA FLJ60194, highly similar to WW domain-binding protein 11	7.2475e-15						0.88358
ADDVDQQQTTNTVEEPLDLIR	2399.15	IPI00219229	U6 snRNA-associated Sm-like protein LSm3;cDNA, FLJ92476, highly similar to Homo sapiens LSM3 homolog, U6 small nuclear RNA associated (S. cerevisiae) (LSM3), mRNA;LSM3 homolog, U6 small nuclear RNA associated (S. cerevisiae);LSM3 protein	3.7302e-62	1.4504	0.85355			0.73904		1.4147	1.5245
ADDYEQVK	966.429	IPI00034159	V-type proton ATPase subunit d 1;Vacuolar proton pump subunit d 1;V-ATPase AC39 subunit;V-ATPase 40 kDa accessory protein;P39;32 kDa accessory protein;cDNA, FLJ93507, highly similar to Homo sapiens ATPase, H+ transporting, lysosomal 38kDa, V0 subunit d isoform 1 (ATP6V0D1), mRNA;cDNA FLJ59090, highly similar to Vacuolar ATP synthase subunit d (EC 3.6.3.14);cDNA FLJ54755, highly similar to Vacuola…	0.0040364						1.9518
ADEALAGLDEGALRK	1527.79	IPI00893770	cDNA FLJ46786 fis, clone TRACH3028837, highly similar to Homo sapiens smoothelin (SMTN), transcript variant 2, mRNA;cDNA FLJ56202, highly similar to Smoothelin;Smoothelin;cDNA FLJ52779, highly similar to Homo sapiens smoothelin (SMTN), transcript variant 2, mRNA;Smoothelin isoform b variant;cDNA FLJ46886 fis, clone UTERU3016308, highly similar to Smoothelin;cDNA FLJ55010, moderately similar to Sm…	0.0023194		0.18212
ADEASELACPTPK	1387.63	IPI00026781	Fatty acid synthase;[Acyl-carrier-protein] S-acetyltransferase;[Acyl-carrier-protein] S-malonyltransferase;3-oxoacyl-[acyl-carrier-protein] synthase;3-oxoacyl-[acyl-carrier-protein] reductase;3-hydroxypalmitoyl-[acyl-carrier-protein] dehydratase;Enoyl-[acyl-carrier-protein] reductase;Oleoyl-[acyl-carrier-protein] hydrolase;FASN protein	6.9831e-28	2.2009	4.3987	2.8716		1.3718	0.58224		1.3664	1.2656
ADEASELACPTPKEDGLAQQQTQLNLR	2982.44	IPI00026781	Fatty acid synthase;[Acyl-carrier-protein] S-acetyltransferase;[Acyl-carrier-protein] S-malonyltransferase;3-oxoacyl-[acyl-carrier-protein] synthase;3-oxoacyl-[acyl-carrier-protein] reductase;3-hydroxypalmitoyl-[acyl-carrier-protein] dehydratase;Enoyl-[acyl-carrier-protein] reductase;Oleoyl-[acyl-carrier-protein] hydrolase;FASN protein	3.191e-51			3.0357			0.94993			0.86614
ADEDGDTPLHIAVVQGNLPAVHR	2423.22	IPI00025428	B-cell lymphoma 3-encoded protein;cDNA FLJ51484, highly similar to B-cell lymphoma 3-encoded protein	0.0042375	0.53191
ADEDGEGIHPSAPHR	1586.71	IPI00645303	Sorting nexin-27	0.0023194	1.1672			1.1137	0.76955
ADEDPALFQSVK	1318.64	IPI00395939	cDNA FLJ53628, highly similar to Phosphatidylinositol transfer protein beta isoform;Phosphatidylinositol transfer protein, beta, isoform CRA_a;Phosphatidylinositol transfer protein beta isoform;cDNA, FLJ93543, highly similar to Homo sapiens phosphotidylinositol transfer protein, beta (PITPNB),mRNA;cDNA FLJ41390 fis, clone BRCAN2024572, moderately similar to Phosphatidylinositol transfer protein b…	2.2374e-27	0.56808	0.63261	0.47279			0.72514	0.59807		0.54872
ADEDPIMGFHQMFLLK	1890.9	IPI00009901	Nuclear transport factor 2;Placental protein 15;Nuclear transport factor 2, isoform CRA_a;cDNA, FLJ92083, Homo sapiens nuclear transport factor 2 (NUTF2), mRNA	2.2979e-37	1.1961	1.3188	1.0976				1.6219	1.8108	0.97121
ADEELEALRR	1200.61	IPI00023640	Programmed cell death protein 5;TF-1 cell apoptosis-related protein 19;cDNA FLJ52456, moderately similar to Programmed cell death protein 5;Programmed cell death 5 short isoform	0.01427	0.65864	0.81781	0.87705		0.86134		0.84127	0.87361	2.1604
ADEEPTPADGR	1156.5	IPI00410618	Uncharacterized protein KIAA1143	0.0013428			0.86005
ADEGISFR	893.424	IPI00000874	Peroxiredoxin-1;Thioredoxin peroxidase 2;Thioredoxin-dependent peroxide reductase 2;Proliferation-associated gene protein;Natural killer cell-enhancing factor A;cDNA, FLJ92164, highly similar to Homo sapiens peroxiredoxin 1 (PRDX1), mRNA;Peroxiredoxin 1 (Peroxiredoxin 1, isoform CRA_a)	0.0040364		0.93788	0.69053	0.81092	0.71322	0.54379	0.90909
ADEHVIDQGDDGDNFYVIER	2306.01	IPI00219774	cAMP-dependent protein kinase type II-alpha regulatory subunit;cDNA FLJ75444, highly similar to Homo sapiens protein kinase, cAMP-dependent, regulatory, type II, alpha (PRKAR2A), mRNA;PRKAR2A protein;Protein kinase, cAMP-dependent, regulatory, type II, alpha;Protein kinase, cAMP-dependent, regulatory, type II, alpha, isoform CRA_b	2.7277e-17	1.3688				0.61515			0.69883
ADEKFNQLVHFLR	1615.85	IPI00185361	ATP-dependent RNA helicase DDX55;DEAD box protein 55;DDX55 protein;cDNA FLJ56793, highly similar to Homo sapiens DEAD (Asp-Glu-Ala-Asp) box polypeptide 55 (DDX55), mRNA;cDNA FLJ23639 fis, clone CAS11535	0.68863			0.9699			0.75164			2.374
ADELASQDGR	1060.48	IPI00012834	Serine/threonine-protein phosphatase 2A 56 kDa regulatory subunit gamma isoform;PP2A, B subunit, B' gamma isoform;PP2A, B subunit, B56 gamma isoform;PP2A, B subunit, PR61 gamma isoform;PP2A, B subunit, R5 gamma isoform;Renal carcinoma antigen NY-REN-29;cDNA FLJ57234, highly similar to Serine/threonine-protein phosphatase 2A 56 kDa regulatory subunit gamma isoform;Protein phosphatase 2, regulatory…	0.15307						0.45488
ADELLCWEDSAGHWLYE	2092.88	IPI00012315	Nucleoside diphosphate kinase 3;Nucleoside diphosphate kinase C;nm23-H3;DR-nm23;Nucleoside diphosphate kinase	0.00070436
ADEMYDKCIDLEPDNATTYVHK	2627.15	IPI00015602	Mitochondrial import receptor subunit TOM70;Mitochondrial precursor proteins import receptor;Translocase of outer membrane 70 kDa subunit;cDNA FLJ90621 fis, clone PLACE1002547, highly similar to Mitochondrial proteins import receptor;cDNA FLJ57240, highly similar to Mitochondrial proteins import receptor;cDNA FLJ90599 fis, clone PLACE1001340, highly similar to Mitochondrial proteins importreceptor	0.00023236						0.094071
ADEPMEH	827.312	IPI00472442	Proteasome subunit alpha type-1;Proteasome component C2;Macropain subunit C2;Multicatalytic endopeptidase complex subunit C2;Proteasome nu chain;30 kDa prosomal protein;PROS-30;Proteasome subunit alpha type;Putative uncharacterized protein PSMA1	0.23798
ADEVLEILK	1028.58	IPI00420014	U5 small nuclear ribonucleoprotein 200 kDa helicase;U5 snRNP-specific 200 kDa protein;Activating signal cointegrator 1 complex subunit 3-like 1;BRR2 homolog;SNRNP200 protein;cDNA FLJ55548, highly similar to U5 small nuclear ribonucleoprotein 200 kDa helicase (EC 3.6.1.-);cDNA FLJ13778 fis, clone PLACE4000431, highly similar to H.sapiens U5 snRNP-specific 200kD protein;PRO2281;Putative RNA helicase	0.0049144			1.2816			1.2205			1.7937
ADEVVWVR	972.503	IPI00216951	Aspartyl-tRNA synthetase, cytoplasmic;Aspartate--tRNA ligase;Cell proliferation-inducing gene 40 protein;cDNA FLJ77907, highly similar to Homo sapiens aspartyl-tRNA synthetase, mRNA;Aspartyl-tRNA synthetase, isoform CRA_a;Putative uncharacterized protein DARS;Putative uncharacterized protein DKFZp781B11202	1.566e-05	0.62767		0.84482		1.4976		0.742	0.42004	0.88304
ADEWLMK	891.416	IPI00019502	Myosin-9;Myosin heavy chain 9;Myosin heavy chain, non-muscle IIa;Non-muscle myosin heavy chain IIa;Cellular myosin heavy chain, type A;Non-muscle myosin heavy chain A;cDNA FLJ77145, highly similar to Homo sapiens myosin, heavy polypeptide 9, non-muscle (MYH9), mRNA;cDNA FLJ57040, highly similar to Myosin-9;Non-muscle myosin heavy polypeptide 9;MYH9 variant protein;Myosin, heavy polypeptide 9, non…	0.00043521		0.13199	0.065461				0.12972	0.064811	0.10564
ADFAQACQDAGVR	1407.62	IPI00299402	Pyruvate carboxylase, mitochondrial;Pyruvic carboxylase;cDNA FLJ60715, highly similar to Pyruvate carboxylase, mitochondrial (EC 6.4.1.1)	1.002e-43	1.2251	2.0933	1.5454		2.1584	1.3765	1.1481	0.53139	0.73531
ADFCIIHYAGK	1293.62	IPI00019502	Myosin-9;Myosin heavy chain 9;Myosin heavy chain, non-muscle IIa;Non-muscle myosin heavy chain IIa;Cellular myosin heavy chain, type A;Non-muscle myosin heavy chain A;cDNA FLJ77145, highly similar to Homo sapiens myosin, heavy polypeptide 9, non-muscle (MYH9), mRNA;cDNA FLJ57040, highly similar to Myosin-9;Non-muscle myosin heavy polypeptide 9;MYH9 variant protein;Myosin, heavy polypeptide 9, non…	2.1196e-14	0.067133	0.11783	0.065935	0.44768	0.9242	0.44289	0.16195	0.069151	0.078214
ADFDDRVSDEEK	1424.61	IPI00005969	F-actin-capping protein subunit alpha-1;CapZ alpha-1;cDNA FLJ75422, highly similar to Homo sapiens capping protein (actin filament) muscle Z-line, alpha 1, mRNA	8.1906e-14	1.6226	1.6459		1.6818	1.2441	1.4244	0.75967
ADFDDRVSDEEKVR	1679.78	IPI00005969	F-actin-capping protein subunit alpha-1;CapZ alpha-1;cDNA FLJ75422, highly similar to Homo sapiens capping protein (actin filament) muscle Z-line, alpha 1, mRNA	7.9709e-16			0.89419			1.0622			0.35249
ADFDNTVAIHPTSSEELVTLR	2314.14	IPI00016862	Glutathione reductase, mitochondrial;Glutathione reductase	8.8385e-24	3.4285				1.1217	1.0525	2.5755		4.5444
ADFDTYDDR	1116.44	IPI00014263	Eukaryotic translation initiation factor 4H;Williams-Beuren syndrome chromosomal region 1 protein;Putative uncharacterized protein WBSCR1	0.00011104	1.5527			1.7654	2.5586			2.5961
ADFDTYDDRAYSSFGGGR	1998.83	IPI00014263	Eukaryotic translation initiation factor 4H;Williams-Beuren syndrome chromosomal region 1 protein;Putative uncharacterized protein WBSCR1	3.4341e-16	1.5621	1.377			1.4256		0.94109
ADFFEDENGQR	1326.55	IPI00031397	Long-chain-fatty-acid--CoA ligase 3;Long-chain acyl-CoA synthetase 3;cDNA, FLJ95462, highly similar to Homo sapiens fatty-acid-Coenzyme A ligase, long-chain 3 (FACL3),mRNA;cDNA FLJ10609 fis, clone NT2RP2005276, highly similar to Long-chain-fatty-acid--CoA ligase 3 (EC 6.2.1.3);cDNA FLJ13129 fis, clone NT2RP3002969, highly similar to Long-chain-fatty-acid--CoA ligase 3 (EC 6.2.1.3);ACSL3 protein	5.4093e-10								0.28798
ADFHVGAHVNTFWR	1655.8	IPI00026219	Cleavage and polyadenylation specificity factor subunit 1;Cleavage and polyadenylation specificity factor 160 kDa subunit;cDNA FLJ60434, highly similar to Cleavage and polyadenylation specificity factor 160 kDa subunit;Polyadenylation specificity factor	0.135		0.85406					1.2816
ADFPAGIPECGTDALR	1688.78	IPI00893918	Valyl-tRNA synthetase;Valine--tRNA ligase;Protein G7a;Valyl-tRNA synthetase, isoform CRA_a;cDNA FLJ54383, highly similar to Valyl-tRNA synthetase (EC 6.1.1.9)	5.1655e-27	0.089117	0.912	0.68923				0.92746
ADFPRPDHR	1109.54	IPI00005648	Scaffold attachment factor B2;SAFB2 protein	0.1114									1.9076
ADFQGISPER	1118.54	IPI00009407	Dolichyl-diphosphooligosaccharide--protein glycosyltransferase subunit DAD1;Defender against cell death 1;Defender against cell death 1 variant	0.0015713							0.97573	1.3332
ADFSDNESAR	1110.46	IPI00328846	Protein FAM83A;Tumor-specific gene expressed in prostate protein;BJ-TSA-9	0.0032763						1.1912
ADFSGMSQTDLSLSK	1585.73	IPI00413451	cDNA, FLJ95410, highly similar to Homo sapiens serine (or cysteine) proteinase inhibitor, clade B(ovalbumin), member 6 (SERPINB6), mRNA;Putative uncharacterized protein;Putative uncharacterized protein DKFZp686I04222;Serpin B6;Placental thrombin inhibitor;Cytoplasmic antiproteinase;Proteinase inhibitor 6;MSTP057;Serine proteinase inhibitor;Serpin peptidase inhibitor, clade B (Ovalbumin), member 6	3.4511e-67	2.6942	2.3968		0.93546	2.4911			1.3957
ADFSGMSTEK	1071.45	IPI00032134	Serpin B8;Cytoplasmic antiproteinase 2;Proteinase inhibitor 8;cDNA, FLJ94391, highly similar to Homo sapiens serine (or cysteine) proteinase inhibitor, clade B (ovalbumin), member 8 (SERPINB8), mRNA;cDNA FLJ57144, highly similar to Serpin B8	0.0020405									0.46749
ADFSPFGNSQGPSR	1465.66	IPI00554590	Rab3 GTPase-activating protein non-catalytic subunit;Rab3 GTPase-activating protein 150 kDa subunit;Rab3-GAP p150;Rab3-GAP regulatory subunit;RGAP-iso;RAB3 GTPase activating protein subunit 2 (Non-catalytic);cDNA FLJ78421, highly similar to Homo sapiens RAB3 GTPase activating protein subunit 2 (non-catalytic) (RAB3GAP2), mRNA;cDNA FLJ14579 fis, clone NT2RM4001203, highly similar to Rab3 GTPase-ac…	3.6842e-34				0.32422	0.34824		0.42833		0.27522
ADGAEAKPAE	957.44	IPI00019502	Myosin-9;Myosin heavy chain 9;Myosin heavy chain, non-muscle IIa;Non-muscle myosin heavy chain IIa;Cellular myosin heavy chain, type A;Non-muscle myosin heavy chain A;cDNA FLJ77145, highly similar to Homo sapiens myosin, heavy polypeptide 9, non-muscle (MYH9), mRNA;cDNA FLJ57040, highly similar to Myosin-9;Non-muscle myosin heavy polypeptide 9;MYH9 variant protein;Myosin, heavy polypeptide 9, non…	0.012569		0.12745
ADGELNVDSLITR	1401.71	IPI00218236	Serine/threonine-protein phosphatase PP1-beta catalytic subunit;Serine/threonine protein phosphatase	2.509e-19	0.80491	0.86595			0.90313
ADGESCSVLMMYQESK	1833.76	CON_00688316		1.8658e-05	0.68635	0.014411			0.011879
ADGETILK	845.449	IPI00005102	Spermine synthase;Spermidine aminopropyltransferase	0.10158			1.3967						0.79328
ADGGAEYATYQTK	1373.61	IPI00219852	Membrane cofactor protein;Trophoblast leukocyte common antigen;TLX;Membrane cofactor protein CD46	2.509e-19									1.9551
ADGGPEAGELPSIGEATAALALAGRRPSR	2789.44	IPI00413100	Pleckstrin homology-like domain family B member 1;Protein LL5-alpha;Pleckstrin homology-like domain family B member 1 variant 2;Pleckstrin homology-like domain, family B, member 1, isoform CRA_b;KIAA0638 splice variant 2;cDNA FLJ61283, highly similar to Pleckstrin homology-like domain family B member1;Putative uncharacterized protein DKFZp686H039;PHLDB1 protein	0.0061552							0.10159
ADGHAATLVMK	1112.56	IPI00164005	Conserved oligomeric Golgi complex subunit 7;Component of oligomeric Golgi complex 7;cDNA FLJ36670 fis, clone UTERU2004037, highly similar to Conserved oligomeric Golgi complex component 7	0.00038844		0.64644	2.969	0.58556			0.99995	0.023403	1.4152
ADGILVPGGFGIR	1270.7	IPI00645702	CTP synthase 2;UTP--ammonia ligase 2;CTP synthetase 2;cDNA FLJ43342 fis, clone NT2RI3007978, highly similar to CTP synthase 2 (EC 6.3.4.2);cDNA FLJ43358 fis, clone NT2RP7014005, highly similar to CTP synthase 2 (EC 6.3.4.2);CTP synthase II, isoform CRA_a;cDNA: FLJ22001 fis, clone HEP06629;CTP synthase II	0.0084508	4.2848	2.8469	3.4615	1.0166	1.3164	0.91746	2.0661	2.1128	1.4314
ADGIVPETWIDGPK	1496.75	IPI00514506	39S ribosomal protein L24, mitochondrial;MRP-L24	0.0064266	0.45139				0.055402
ADGLLGMFLK	1063.57	IPI00642584	Uncharacterized protein KIAA0090;KIAA0090;KIAA0090, isoform CRA_b;Putative uncharacterized protein KIAA0090	0.00029384							1.3676	1.5197
ADGNQLTLEER	1244.6	IPI00152540	CD109 antigen;C3 and PZP-like alpha-2-macroglobulin domain-containing protein 7;150 KDa TGF-beta-1-binding protein;Platelet-specific Gov antigen;p180;r150;CD109;cDNA, FLJ94208, highly similar to Homo sapiens CD109 antigen (Gov platelet alloantigens) (CD109), mRNA;cDNA FLJ41966 fis, clone PUAEN2009174, highly similar to Homo sapiens CD109 antigen (Gov platelet alloantigens) (CD109), mRNA	0.00038844			0.016967				2.6768		0.065946
ADGQMPFSCHYPSR	1651.69	IPI00007264	Heat shock protein beta-8;Alpha-crystallin C chain;Small stress protein-like protein HSP22;E2-induced gene 1 protein;Protein kinase H11;Heat shock 22kDa protein 8;cDNA, FLJ92864, Homo sapiens protein kinase H11 (H11), mRNA	4.1974e-45	14.108		11.735		2.5766		6.6973		14.448
ADGQVAELLLR	1183.66	IPI00031820	Phenylalanyl-tRNA synthetase alpha chain;Phenylalanine--tRNA ligase alpha chain;CML33;FARSLA protein;cDNA FLJ34774 fis, clone NT2NE2003309, highly similar to Phenylalanyl-tRNA synthetase alpha chain (EC 6.1.1.20);Phenylalanine-tRNA synthetase-like, alpha subunit, isoform CRA_b;cDNA FLJ50378, highly similar to Phenylalanyl-tRNA synthetase alpha chain (EC 6.1.1.20)	3.3355e-40	1.2533	1.1153			0.32798		1.0017	1.1121
ADGSSLPEWVTDNAGTLHFAR	2243.06	IPI00298292	Tyrosine-protein kinase-like 7;Colon carcinoma kinase 4;cDNA FLJ55335, highly similar to Tyrosine-protein kinase-like 7;PTK7 protein tyrosine kinase 7 isoform a variant	6.203e-06			0.10802						0.24029
ADGVVEGIDVNGPK	1368.69	IPI00742124	UBX domain-containing protein 7;cDNA FLJ61199, highly similar to UBX domain-containing protein 7	1.247e-25	1.4684	1.6408		2.0914	2.9767			2.2251
ADGYEPPVQESV	1289.58	IPI00419880	40S ribosomal protein S3a;cDNA FLJ78591, highly similar to Homo sapiens ribosomal protein S3A (RPS3A), mRNA;Ribosomal protein S3A, isoform CRA_d;cDNA, FLJ92049, Homo sapiens ribosomal protein S3A (RPS3A), mRNA;cDNA FLJ51870, highly similar to 40S ribosomal protein S3a;Ribosomal protein S3A	0.037285
ADGYVLEGK	950.471	IPI00216587	40S ribosomal protein S8;Ribosomal protein S8;Similar to ribosomal protein S8	0.0049144		1.693	1.1373		1.6174	0.72065	0.93605	1.0188	1.1191
ADGYVLEGKELEFYLRK	2029.05	IPI00216587	40S ribosomal protein S8;Ribosomal protein S8;Similar to ribosomal protein S8	0.48153			1.0138			1.7846
ADHDFVVQEDFMK	1579.7	IPI00926977	26S protease regulatory subunit S10B;Proteasome 26S subunit ATPase 6;Proteasome subunit p42;Proteasome (Prosome, macropain) 26S subunit, ATPase, 6;cDNA, FLJ94253, Homo sapiens proteasome (prosome, macropain) 26S subunit, ATPase, 6(PSMC6), mRNA	1.6607e-08	1.037	1.1248	1.3725		1.6427		1.2704		1.5622
ADHGDELPFVFR	1401.67	IPI00332828	Carboxylesterase 2;cDNA FLJ76104, highly similar to Homo sapiens carboxylesterase 2 (intestine, liver) (CES2), transcript variant 1, mRNA;Carboxylesterase 2 isoform 1 variant	0.0004344									0.09876
ADHGEPIGR	950.457	IPI00414676	Heat shock protein HSP 90-beta;HSP 84;cDNA FLJ77842;Heat shock protein 90kDa alpha (Cytosolic), class B member 1, isoform CRA_a;cDNA, FLJ92550, Homo sapiens heat shock 90kDa protein 1, beta (HSPCB), mRNA;cDNA FLJ53619, highly similar to Heat shock protein HSP 90-beta;cDNA FLJ54023, highly similar to Heat shock protein HSP 90-beta;HSP90AB1 protein;cDNA: FLJ21717 fis, clone COL10322;Putative heat s…	0.10105		1.4923	1.3466			1.7332	0.97786		1.5942
ADHHATNGVVHLIDK	1625.83	IPI00018219	Transforming growth factor-beta-induced protein ig-h3;Kerato-epithelin;RGD-containing collagen-associated protein;Transforming growth factor, beta-induced, 68kDa variant;Transforming growth factor, beta-induced, 68kDa;Transforming growth factor, beta-induced, 68kDa, isoform CRA_b	2.3814e-14								0.065613
ADHHQQMFNIK	1367.64	IPI00796450	Lysosomal-trafficking regulator;Beige homolog;LYST protein	0.018937								0.036431
ADHNPDSDSTPR	1310.55	IPI00465368	Centromere protein T;Interphase centromere complex protein 22;cDNA FLJ78451;cDNA FLJ31535 fis, clone NT2RI2000685	0.0092317			0.79666			3.0393
ADHPFLFVIR	1213.66	IPI00021555	Serpin B7;Megsin;TP55;cDNA FLJ75069, highly similar to Homo sapiens serpin peptidase inhibitor, clade B (ovalbumin), member 7 (SERPINB7), mRNA;cDNA FLJ77984, highly similar to Homo sapiens serpin peptidase inhibitor, clade B (ovalbumin), member 7 (SERPINB7), mRNA;cDNA FLJ58461, highly similar to Serpin B7;Putative uncharacterized protein DKFZp686D06190	0.012569	2.8898	2.2102	0.29189	3.0108	4.429				0.091665
ADHPPAEVTSHAASGAK	1644.79	IPI00008918	LIM domain and actin-binding protein 1;Epithelial protein lost in neoplasm;LIM domain and actin binding 1;LIM domain and actin binding 1, isoform CRA_b;cDNA, FLJ95246, Homo sapiens epithelial protein lost in neoplasm beta (EPLIN),mRNA;Epithelial protein lost in neoplasm beta variant	0.015442			0.53372			0.41191	5.0666		0.77364
ADHQPFTEASYVNLPTIALCNTDSPLR	3029.46	IPI00942587		0.87502					12.86
ADHQPLTEASYVNLPTIALCNTDSPLR	2995.47	IPI00413108	40S ribosomal protein SA;Laminin receptor 1;37/67 kDa laminin receptor;Laminin-binding protein precursor p40;37 kDa laminin receptor precursor;67 kDa laminin receptor;Colon carcinoma laminin-binding protein;NEM/1CHD4;Multidrug resistance-associated protein MGr1-Ag;Putative uncharacterized protein RPSAP18	3.8411e-58	1.2643	0.92272	1.0496		1.2543	1.258	0.85914	0.93867	0.79051
ADHSFSDGVPSDSVEAAK	1817.81	IPI00017763	Nucleosome assembly protein 1-like 4;Putative uncharacterized protein NAP1L4;cDNA, FLJ92975, highly similar to Homo sapiens nucleosome assembly protein 1-like 4 (NAP1L4), mRNA;cDNA FLJ59403, highly similar to Nucleosome assembly protein 1-like 4;cDNA, FLJ79141, highly similar to Nucleosome assembly protein 1-like 4;cDNA, FLJ79223, highly similar to Nucleosome assembly protein 1-like 4;cDNA, FLJ79…	7.1535e-62	0.55632	0.64007	0.64258		0.62294	0.6955		0.48273
ADHTLSSLEPAYSAK	1588.77	IPI00065500	BRO1 domain-containing protein BROX;cDNA FLJ53758;cDNA FLJ50123;C1orf58 protein;cDNA, FLJ78829	6.4616e-42	0.22587	0.20519	0.10337		0.17761	0.11764	0.68909	0.57271
ADHVQSLAQLENLCK	1724.85	IPI00855940	cDNA FLJ76855, highly similar to Homo sapiens exportin 7 (XPO7), mRNA;Exportin-7;Ran-binding protein 16;cDNA FLJ56596, highly similar to Exportin-7	3.4511e-67		1.3409	1.2375				0.70977		0.79906
ADIALIK	742.459	IPI00003176	Serine protease HTRA1;L56;Serine protease 11;cDNA FLJ34625 fis, clone KIDNE2015244, highly similar to Serine protease HTRA1 (EC 3.4.21.-)	0.011524								0.062243	0.042173
ADIASLR	744.413	IPI00382844	Aconitase;Apoptosis-inducing factor 1, mitochondrial;Programmed cell death protein 8;Apoptosis-inducing factor;Striatal apoptosis-inducing factor	0.098046						1.0846
ADIDLTK	774.412	IPI00013296	40S ribosomal protein S18;Ke-3;Ribosomal protein S18;Ribosomal protein S18, isoform CRA_b	0.0017668	1.0866	1.3618		0.90555	1.4018	1.2965		0.97162	1.1402
ADIDLTKR	930.513	IPI00013296	40S ribosomal protein S18;Ke-3;Ribosomal protein S18;Ribosomal protein S18, isoform CRA_b	1									1.1452
ADIDVSGPSVDTDAPDLDIEGPEGK	2511.15	IPI00021812	Neuroblast differentiation-associated protein AHNAK;Desmoyokin;cDNA FLJ57801, highly similar to Homo sapiens AHNAK nucleoprotein (desmoyokin) (AHNAK), transcript variant 1, mRNA;AHNAK-related protein;cDNA FLJ46846 fis, clone UTERU3004635, moderately similar to Neuroblast differentiation associated protein AHNAK;cDNA FLJ33834 fis, clone CTONG2004264, moderately similar to NEUROBLAST DIFFERENTIATIO…	1.1386e-180	0.43251	0.6233		0.62809	0.67517		0.22756	0.22831
ADIEEIK	816.423	IPI00009123	Nucleobindin-2;DNA-binding protein NEFA;Gastric cancer antigen Zg4;Nucleobindin 2;Nucb2 splice variant	0.087905	0.83784		1.2654			0.45548	0.89421		1.7701
ADIEER	731.345	IPI00014898	Plectin-1;Hemidesmosomal protein 1;Similar to plectin 1, intermediate filament binding protein, 500kD;HCG1994702;Plectin isoform 1b	0.86552		0.58136							0.12774
ADIEISGPK	928.487	IPI00021812	Neuroblast differentiation-associated protein AHNAK;Desmoyokin;cDNA FLJ57801, highly similar to Homo sapiens AHNAK nucleoprotein (desmoyokin) (AHNAK), transcript variant 1, mRNA;AHNAK-related protein;cDNA FLJ46846 fis, clone UTERU3004635, moderately similar to Neuroblast differentiation associated protein AHNAK;cDNA FLJ33834 fis, clone CTONG2004264, moderately similar to NEUROBLAST DIFFERENTIATIO…	0.00013843		0.61055		0.64202		0.56414		0.18674	0.15902
ADIEMPFDPSK	1248.57	IPI00477536	Filamin-B;Beta-filamin;Actin-binding-like protein;Thyroid autoantigen;Truncated actin-binding protein;ABP-280 homolog;ABP-278;Filamin 3;Filamin homolog 1;Filamin B;Putative uncharacterized protein DKFZp686A1668;Filamin B variant 2	2.1196e-14	0.25178	0.2298	0.19334	0.42535	0.29308	0.29783	0.068222		0.051056
ADIEVACYGYEGIDAVK	1871.86	IPI00219678	Eukaryotic translation initiation factor 2 subunit 1;Eukaryotic translation initiation factor 2 subunit alpha;Eukaryotic translation initiation factor 2, subunit 1 alpha, 35kDa, isoform CRA_a;Full-length cDNA clone CS0DL010YH08 of B cells (Ramos cell line) of Homo sapiens (human);cDNA, FLJ92791, Homo sapiens eukaryotic translation initiation factor 2, subunit 1 alpha, 35kDa (EIF2S1), mRNA	4.2308e-19	1.0664
ADIFMFDEPSSYLDVK	1875.86	IPI00303207	ATP-binding cassette sub-family E member 1;RNase L inhibitor;Ribonuclease 4 inhibitor;2'-5'-oligoadenylate-binding protein;HuHP68	8.9655e-74			1.2312		1.1321	0.85472	0.87843	0.98174	1.0189
ADIFVDPVLHTACALDIK	1997.03	IPI00414717	Golgi apparatus protein 1;Golgi sialoglycoprotein MG-160;E-selectin ligand 1;Cysteine-rich fibroblast growth factor receptor;CFR-1;cDNA FLJ61698, highly similar to Golgi apparatus protein 1;cDNA FLJ23967 fis, clone HEP16652, highly similar to Golgi apparatus protein 1	5.9979e-05	2.7139	2.0743	3.1342		3.3258	2.2022	1.4781		2.0218
ADIGIAMGISGSDVSK	1519.76	IPI00375339	Sodium/potassium-transporting ATPase subunit alpha-4;Na(+)/K(+) ATPase alpha-4 subunit;ATPase Na+/K+ transporting alpha 4	1								1.6759
ADIGPNLDQLK	1182.62	IPI00552569	DNA excision repair protein ERCC-6-like;ATP-dependent helicase ERCC6-like;PLK1-interacting checkpoint helicase;Tumor antigen BJ-HCC-15;FLJ20105 protein, isoform CRA_a;Putative uncharacterized protein ERCC6L	3.8404e-06		0.59757
ADIGVAMGIAGSDVSK	1489.74	IPI00646182	cDNA FLJ55427, highly similar to Sodium/potassium-transporting ATPase alpha-1 chain (EC 3.6.3.9);cDNA FLJ60077, highly similar to Sodium/potassium-transporting ATPase alpha-1 chain (EC 3.6.3.9);Sodium/potassium-transporting ATPase subunit alpha-1;Na(+)/K(+) ATPase alpha-1 subunit;cDNA FLJ59513, highly similar to Sodium/potassium-transporting ATPase alpha-3 chain (EC 3.6.3.9);cDNA FLJ54717, highly…	2.3307e-34	1.0615		0.82814		0.62826	1.036
ADIIAR	657.381	IPI00925804	Non-functional aryl hydrocarbon receptor interacting protein;AH receptor-interacting protein;Aryl-hydrocarbon receptor-interacting protein;Immunophilin homolog ARA9;HBV X-associated protein 2;Aryl-hydrocarbon receptor interacting protein;Mutant aryl hydrocarbon receptor-interacting protein;Aryl hydrocarbon receptor interacting protein;Truncated AIP	0.60523			0.95067			2.3792
ADIIYPGHGPVIHNAEAK	1900.98	IPI00006952	Beta-lactamase-like protein 2;cDNA FLJ76011, highly similar to Homo sapiens lactamase, beta 2 (LACTB2), mRNA	3.4341e-16	0.44795	0.48245		0.82546	0.63808		1.0422		0.80285
ADIKFK	720.417	IPI00019276	UBX domain-containing protein 6;UBX domain-containing protein 1	0.32482							0.033939
ADILEDK	802.407	IPI00171903	Heterogeneous nuclear ribonucleoprotein M;Heterogeneous nuclear ribonucleoprotein M isoform a variant;ORF protein;cDNA FLJ60435, highly similar to Heterogeneous nuclear ribonucleoprotein M;HNRPM protein;Putative uncharacterized protein DKFZp547H118	0.26392				0.90288
ADILEDKDGK	1102.55	IPI00171903	Heterogeneous nuclear ribonucleoprotein M;Heterogeneous nuclear ribonucleoprotein M isoform a variant;ORF protein;cDNA FLJ60435, highly similar to Heterogeneous nuclear ribonucleoprotein M;HNRPM protein;Putative uncharacterized protein DKFZp547H118	0.00023232			1.0474			0.29006			1.3976
ADILEDKDGKSR	1345.68	IPI00171903	Heterogeneous nuclear ribonucleoprotein M;Heterogeneous nuclear ribonucleoprotein M isoform a variant;ORF protein;cDNA FLJ60435, highly similar to Heterogeneous nuclear ribonucleoprotein M;HNRPM protein;Putative uncharacterized protein DKFZp547H118	0.29287			0.47956			0.226
ADILQVGLR	983.576	IPI00021466	Polyadenylate-binding protein-interacting protein 1;Putative uncharacterized protein PAIP1	1.1749e-10	1.0255	0.99636		0.88326	0.86453	0.90077	1.4774	1.5675
ADIQLLVYTIDDLIDK	1846.99	IPI00020075	Abhydrolase domain-containing protein 10, mitochondrial;cDNA FLJ50858, highly similar to Homo sapiens abhydrolase domain containing 10 (ABHD10), mRNA	0.00043867	0.92681
ADIQMPFTCSVTYYGPSGQK	2249.01	IPI00015102	CD166 antigen;Activated leukocyte cell adhesion molecule;cDNA FLJ30070 fis, clone ASTRO2000046, highly similar to CD166 ANTIGEN;cDNA FLJ59249, highly similar to CD166 antigen;cDNA, FLJ79012, highly similar to CD166 antigen;cDNA FLJ52980, highly similar to CD166 antigen;cDNA FLJ45715 fis, clone FELNG2000720, highly similar to CD166 antigen	7.6718e-169	0.15439	0.35868		0.11004	0.30425
ADIQTER	831.409	IPI00025091	40S ribosomal protein S11;Ribosomal protein S11;cDNA, FLJ92070, Homo sapiens ribosomal protein S11 (RPS11), mRNA	0.00043521	1.0907		1.5249	1.1092		1.3304	0.90876	1.0393
ADISLDELIRK	1271.71	IPI00440688	cDNA FLJ54030, highly similar to Polymerase delta-interacting protein 3;Polymerase delta-interacting protein 3;46 kDa DNA polymerase delta interaction protein;p46;cDNA FLJ52566, highly similar to Polymerase delta-interacting protein 3;POLDIP3 protein;cDNA FLJ75715, highly similar to Homo sapiens polymerase (DNA-directed), delta interacting protein 3 (POLDIP3), transcript variant 2, mRNA;Polymeras…	0.13171	0.35092				0.60617
ADIVQQLLQQGASPNAATTSGYTPLHLSAR	3107.6	IPI00472779	Ankyrin-3;Ankyrin-G;Ankyrin 3, node of Ranvier (Ankyrin G);Ankyrin 3 isoform 1 variant;cDNA FLJ58990, highly similar to Ankyrin-3;Ankyrin G119;Putative uncharacterized protein DKFZp686I225;Putative uncharacterized protein DKFZp686P17114	8.5835e-21							1.3579	0.81526
ADIWALGCLLYK	1421.74	IPI00916402	AP2-associated protein kinase 1;Adaptor-associated kinase 1;AAK1 protein;BMP-2-inducible protein kinase;cDNA FLJ78410, highly similar to Homo sapiens BMP2 inducible kinase (BMP2K), transcript variant 2, mRNA;Putative uncharacterized protein BMP2K	8.1906e-14			0.47498			0.73506	0.3593	0.1941	0.28752
ADIWSFGITAIELATGAAPYHK	2331.19	IPI00010080	Serine/threonine-protein kinase OSR1;Oxidative stress-responsive 1 protein	1.2816e-46	0.42579	0.52931		0.87315			0.26126	0.23746
ADIWSLGITAIELAK	1599.89	IPI00911046	Serine/threonine-protein kinase 25;Sterile 20/oxidant stress-response kinase 1;Ste20-like kinase;cDNA FLJ75758, highly similar to Homo sapiens serine/threonine kinase 25 (STE20 homolog, yeast) (STK25), mRNA;Serine/threonine kinase 25 (STE20 homolog, yeast), isoform CRA_a;cDNA FLJ34842 fis, clone NT2NE2011033, highly similar to Serine/threonine-protein kinase 25 (EC 2.7.11.1);cDNA FLJ52778, highly…	5.0621e-54			0.70782			2.2053
ADKDYHFK	1022.48	IPI00549248	Nucleophosmin;Nucleolar phosphoprotein B23;Numatrin;Nucleolar protein NO38;Truncated nucleolar phosphoprotein B23;cDNA FLJ76122, highly similar to Homo sapiens nucleophosmin (nucleolar phosphoprotein B23, numatrin) (NPM1), transcript variant 1, mRNA;Nucleophosmin (Nucleolar phosphoprotein B23, numatrin), isoform CRA_a;Nucleophosmin 1 isoform 1;NPM1 protein;Nucleophosmin (Nucleolar phosphoprotein …	0.12698			2.0866			0.81492			1.8743
ADKDYHFKVDNDENEHQLSLR	2572.19	IPI00549248	Nucleophosmin;Nucleolar phosphoprotein B23;Numatrin;Nucleolar protein NO38;Truncated nucleolar phosphoprotein B23;cDNA FLJ76122, highly similar to Homo sapiens nucleophosmin (nucleolar phosphoprotein B23, numatrin) (NPM1), transcript variant 1, mRNA;Nucleophosmin (Nucleolar phosphoprotein B23, numatrin), isoform CRA_a;Nucleophosmin 1 isoform 1;NPM1 protein;Nucleophosmin (Nucleolar phosphoprotein …	3.7302e-62			1.942			1.2246			2.2999
ADKEAAFDDAVEER	1564.7	IPI00328319	Histone-binding protein RBBP4;Retinoblastoma-binding protein 4;Retinoblastoma-binding protein p48;Chromatin assembly factor 1 subunit C;Chromatin assembly factor I p48 subunit;CAF-I 48 kDa subunit;CAF-I p48;Nucleosome-remodeling factor subunit RBAP48;Retinoblastoma binding protein 4, isoform CRA_a;cDNA, FLJ92946, Homo sapiens retinoblastoma binding protein 4 (RBBP4), mRNA	4.1974e-45			0.74682			0.73323
ADKEGDYYVLNGSK	1557.73	IPI00024623	Short/branched chain specific acyl-CoA dehydrogenase, mitochondrial;2-methyl branched chain acyl-CoA dehydrogenase;2-methylbutyryl-coenzyme A dehydrogenase;cDNA FLJ57418, highly similar to Short/branched chain specific acyl-CoAdehydrogenase, mitochondrial (EC 1.3.99.-);Acyl-Coenzyme A dehydrogenase, short/branched chain;cDNA, FLJ94986, Homo sapiens acyl-Coenzyme A dehydrogenase, short/branched ch…	3.4755e-08						0.067532
ADKLAEEHSS	1085.5	IPI00303476	ATP synthase subunit beta, mitochondrial;ATP synthase subunit beta	0.20429			0.85008			0.43312			0.68488
ADKNEVAAEVAK	1243.64	IPI00008240	Methionyl-tRNA synthetase, cytoplasmic;Methionine--tRNA ligase;cDNA FLJ76789, highly similar to Homo sapiens methionine-tRNA synthetase (MARS), mRNA;cDNA FLJ16674 fis, clone THYMU3008136, highly similar to Methionyl-tRNA synthetase (EC 6.1.1.10)	1.3268e-05			1.6189			0.9492			0.71354
ADKPDMGEIASFDK	1522.7	IPI00220827	Thymosin beta-10;Migration-inducing protein 12;Putative uncharacterized protein TMSB10;cDNA, FLJ92220, Homo sapiens thymosin, beta 10 (TMSB10), mRNA	8.4397e-49	1.7158	1.3119	0.4136	9.5834	0.081445	1.2774	0.17428	3.9294	0.10945
ADKPHQDCHFTIR	1623.76	IPI00241860	Mitochondrial intermediate peptidase	0.0026564			1.1283			0.48529	0.6402	0.43504	0.6174
ADLAAVEAK	886.476	IPI00456969	Cytoplasmic dynein 1 heavy chain 1;Cytoplasmic dynein heavy chain 1;Dynein heavy chain, cytosolic;cDNA FLJ52684, highly similar to Dynein heavy chain, cytosolic;Dynein heavy chain;Cytoplasmic dynein heavy chain	2.0281e-05	0.34594	0.30429		0.40679	0.97115	0.95601	0.49157		0.5296
ADLAECNIK	1032.49	IPI00012837	Kinesin-1 heavy chain;Ubiquitous kinesin heavy chain;Conventional kinesin heavy chain;cDNA FLJ76989, highly similar to Homo sapiens kinesin family member 5B (KIF5B), mRNA;KIF5B protein;cDNA FLJ51288, highly similar to Kinesin heavy chain	4.5937e-05	0.43288	0.5712	0.37963			0.96786		0.43564
ADLAEEYSK	1024.47	IPI00021347	Ubiquitin-conjugating enzyme E2 L3;Ubiquitin-protein ligase L3;Ubiquitin carrier protein L3;UbcH7;E2-F1;L-UBC;Ubiquitin carrier protein	0.0049144			0.84854			1.0556			0.90303
ADLAEEYSKDR	1295.6	IPI00021347	Ubiquitin-conjugating enzyme E2 L3;Ubiquitin-protein ligase L3;Ubiquitin carrier protein L3;UbcH7;E2-F1;L-UBC;Ubiquitin carrier protein	0.0013428			0.72967						0.92481
ADLANEEKPAIAPPVFVFQK	2183.16	IPI00026337	Ran-binding protein 3;RAN binding protein 3 isoform RANBP3-a variant;cDNA FLJ55542, highly similar to Ran-binding protein 3;cDNA FLJ58549, highly similar to Ran-binding protein 3;RAN binding protein 3 transcript variant a;cDNA FLJ59171, highly similar to Ran-binding protein 3	2.5565e-05			0.63418			1.012
ADLATAPPHVTVVR	1445.8	IPI00170935	Leucine-rich repeat-containing protein 47	1.247e-25	1.1387	1.4218	0.96539	0.91209	1.0755	0.92743	0.982	0.777	0.59657
ADLDKLNIDSIIQR	1612.88	IPI00218187	Serine/threonine-protein phosphatase PP1-gamma catalytic subunit;Protein phosphatase 1C catalytic subunit;cDNA FLJ60729, highly similar to Serine/threonine-protein phosphatase PP1-gammacatalytic subunit (EC 3.1.3.16);Serine/threonine protein phosphatase	1.8407e-21			1.1098			0.44906
ADLDVSGPK	900.455	IPI00021812	Neuroblast differentiation-associated protein AHNAK;Desmoyokin;cDNA FLJ57801, highly similar to Homo sapiens AHNAK nucleoprotein (desmoyokin) (AHNAK), transcript variant 1, mRNA;AHNAK-related protein;cDNA FLJ46846 fis, clone UTERU3004635, moderately similar to Neuroblast differentiation associated protein AHNAK;cDNA FLJ33834 fis, clone CTONG2004264, moderately similar to NEUROBLAST DIFFERENTIATIO…	4.5937e-05	0.42642	0.62731	0.34739	0.7376	0.71935	0.51199	0.24001	0.25929	0.18212
ADLDVSGPKVDIDVPDVNIEGPEGK	2577.28	IPI00021812	Neuroblast differentiation-associated protein AHNAK;Desmoyokin;cDNA FLJ57801, highly similar to Homo sapiens AHNAK nucleoprotein (desmoyokin) (AHNAK), transcript variant 1, mRNA;AHNAK-related protein;cDNA FLJ46846 fis, clone UTERU3004635, moderately similar to Neuroblast differentiation associated protein AHNAK;cDNA FLJ33834 fis, clone CTONG2004264, moderately similar to NEUROBLAST DIFFERENTIATIO…	1.1071e-13			0.33828	1.1545	0.92606	0.53378
ADLDVSGPKVDVDVPDVNIEGPDAK	2563.27	IPI00021812	Neuroblast differentiation-associated protein AHNAK;Desmoyokin;cDNA FLJ57801, highly similar to Homo sapiens AHNAK nucleoprotein (desmoyokin) (AHNAK), transcript variant 1, mRNA;AHNAK-related protein;cDNA FLJ46846 fis, clone UTERU3004635, moderately similar to Neuroblast differentiation associated protein AHNAK;cDNA FLJ33834 fis, clone CTONG2004264, moderately similar to NEUROBLAST DIFFERENTIATIO…	0.061063					1.105
ADLEAQRDVTYEEAK	1736.82	IPI00291928	Ras-related protein Rab-14;cDNA FLJ33570 fis, clone BRAMY2010366, highly similar to RAS-RELATED PROTEIN RAB-14;RAB14, member RAS oncogene family, isoform CRA_a	1.5722e-10		1.6168		1.5217	0.43143	0.59218
ADLEEQLSDEEK	1404.63	IPI00026182	F-actin-capping protein subunit alpha-2;CapZ alpha-2;Capping protein (Actin filament) muscle Z-line, alpha 2;Capping protein (Actin filament) muscle Z-line, alpha 2, isoform CRA_b;cDNA, FLJ95684, Homo sapiens capping protein (actin filament) muscle Z-line, alpha2 (CAPZA2), mRNA;Capping protein (Actin filament) muscle Z-line, alpha 2 variant;cDNA FLJ51827, highly similar to F-actin capping protein…	0.0004344	1.3721				1.0737
ADLEEQLSDEEKVR	1659.8	IPI00026182	F-actin-capping protein subunit alpha-2;CapZ alpha-2;Capping protein (Actin filament) muscle Z-line, alpha 2;Capping protein (Actin filament) muscle Z-line, alpha 2, isoform CRA_b;cDNA, FLJ95684, Homo sapiens capping protein (actin filament) muscle Z-line, alpha2 (CAPZA2), mRNA;Capping protein (Actin filament) muscle Z-line, alpha 2 variant;cDNA FLJ51827, highly similar to F-actin capping protein…	1.8407e-21			0.86112			0.93502
ADLEMQIENLK	1302.65	CON_00450768	Keratin, type I cytoskeletal 17;Cytokeratin-17;Keratin-17;39.1;Radiated keratinocyte mRNA 266 (keratin-related protein)	2.1196e-14		0.025767						0.0041784	0.006406
ADLEMQIENLKEELAYLK	2149.1	CON_00450768	Keratin, type I cytoskeletal 17;Cytokeratin-17;Keratin-17;39.1;Radiated keratinocyte mRNA 266 (keratin-related protein)	7.3464e-39			0.014394						0.0916
ADLEMQIENLKEELAYLKK	2277.19	CON_00450768	Keratin, type I cytoskeletal 17;Cytokeratin-17;Keratin-17;39.1;Radiated keratinocyte mRNA 266 (keratin-related protein)	4.4358e-06			0.028294						0.0062533
ADLEMQIESLK	1275.64	CON_00384444	Keratin, type I cytoskeletal 14;Cytokeratin-14;Keratin-14	1.7748e-11	0.067183						0.043475	0.013972	5.3783
ADLEMQIESLKEELAYLK	2122.09	CON_00384444	Keratin, type I cytoskeletal 14;Cytokeratin-14;Keratin-14	2.7082e-29									0.021787
ADLEMQIESLKEELAYLKK	2250.18	CON_00384444	Keratin, type I cytoskeletal 14;Cytokeratin-14;Keratin-14	1.5229e-23			0.047247						0.004851
ADLEMQIESLTEELAYLK	2095.04	CON_00009865	Keratin, type I cytoskeletal 10;Cytokeratin-10;Keratin-10	7.1934e-34	0.15597		0.070545						0.17395
ADLEMQIESLTEELAYLKK	2223.13	CON_00009865	Keratin, type I cytoskeletal 10;Cytokeratin-10;Keratin-10	4.4358e-06			0.010754			0.034659
ADLFPILMR	1074.59	IPI00929268	cDNA FLJ57057, highly similar to Small subunit processome component 20 homolog;Small subunit processome component 20 homolog;Down-regulated in metastasis protein;Protein Key-1A6;Novel nucleolar protein 73	0.036314			1.654			1.59		1.5651	1.1427
ADLGALELWR	1142.61	IPI00217882	Sortilin;Neurotensin receptor 3;Glycoprotein 95;100 kDa NT receptor;cDNA FLJ76489, highly similar to Homo sapiens sortilin 1 (SORT1), mRNA;cDNA FLJ50262, highly similar to Sortilin;Sortilin 1	5.9309e-20	4.8524				2.9425	1.9582		5.44
ADLHGAIISVTK	1223.69	IPI00032791	Ribonuclease P protein subunit p29;Putative uncharacterized protein POP4;POP4 protein;cDNA, FLJ95660, Homo sapiens POP4 (processing of , S. cerevisiae) homolog(POP4), mRNA;cDNA FLJ57473, highly similar to Ribonuclease P protein subunit p29 (EC 3.1.26.5)	2.2374e-27	0.97476	1.4086	1.2722	1.5216	2.8669		2.5414	2.6719	1.8336
ADLIAYLK	905.522	IPI00465315	Cytochrome c;Cytochrome c, somatic, isoform CRA_a;cDNA, FLJ92098, Homo sapiens cytochrome c (HCS), mRNA;Putative uncharacterized protein ENSP00000384933	3.2355e-08	1.5293	1.645	1.0885	0.48492	0.34875	0.28189	1.6254	1.1759	1.1501
ADLIAYLKK	1033.62	IPI00465315	Cytochrome c;Cytochrome c, somatic, isoform CRA_a;cDNA, FLJ92098, Homo sapiens cytochrome c (HCS), mRNA;Putative uncharacterized protein ENSP00000384933	0.0012138			1.0016		0.077571	0.31824			1.2055
ADLINNLGTIAK	1241.7	IPI00414676	Heat shock protein HSP 90-alpha;HSP 86;Renal carcinoma antigen NY-REN-38;cDNA FLJ31884 fis, clone NT2RP7002906, highly similar to Homo sapiens heat shock 90 kDa protein 1, alpha (HSPCA), transcript variant 1, mRNA;Full-length cDNA 5-PRIME end of clone CS0DN005YI08 of Adult brain of Homo sapiens (human);Heat shock protein 90kDa alpha (Cytosolic), class A member 1, isoform CRA_a;cDNA FLJ75475, high…	2.2374e-27	1.6884	1.1422	1.4984	1.5545	1.4004	1.4003	1.8164	1.8824	2.4752
ADLINNLGTIAKSGTK	1614.89	IPI00414676	Heat shock protein HSP 90-alpha;HSP 86;Renal carcinoma antigen NY-REN-38;cDNA FLJ31884 fis, clone NT2RP7002906, highly similar to Homo sapiens heat shock 90 kDa protein 1, alpha (HSPCA), transcript variant 1, mRNA;Full-length cDNA 5-PRIME end of clone CS0DN005YI08 of Adult brain of Homo sapiens (human);Heat shock protein 90kDa alpha (Cytosolic), class A member 1, isoform CRA_a;cDNA FLJ75475, high…	0.0024877
ADLIPLLLK	994.643	IPI00102377	Ankyrin repeat domain-containing protein 27;VPS9 domain-containing protein	1			1.4266			1.2317			1.5505
ADLISEDVQR	1144.57	IPI00395605	Rho guanine nucleotide exchange factor 1;115 kDa guanine nucleotide exchange factor;p115-RhoGEF;p115RhoGEF;Sub1.5;ARHGEF1 protein;Rho guanine nucleotide exchange factor (GEF) 1, isoform CRA_g;FLJ00369 protein	1.1689e-09	0.56534		0.76609		1.0943	0.98765	0.54227		0.45524
ADLLGIVSELQLK	1397.81	IPI00304189	Optineurin;Optic neuropathy-inducing protein;E3-14.7K-interacting protein;FIP-2;Huntingtin-interacting protein L;Huntingtin yeast partner L;NEMO-related protein;Transcription factor IIIA-interacting protein;cDNA FLJ30841 fis, clone FEBRA2002508, highly similar to Optineurin;Optineurin, isoform CRA_b;cDNA FLJ53267, highly similar to Optineurin;cDNA, FLJ79070, highly similar to Optineurin	1.4349e-12			0.050044
ADLLGSILSSMEKPPSLGDQETR	2443.23	IPI00006863	Sperm-associated antigen 7	1.347e-36	0.70348		0.5962		2.4647			0.8819
ADLLLEPCSHYR	1472.71	IPI00926581	MYH14 variant protein;Myosin-14;Myosin heavy chain 14;Myosin heavy chain, non-muscle IIc;Non-muscle myosin heavy chain IIc;Nonmuscle myosin heavy chain II-C variant;MYH14 protein;cDNA FLJ43092 fis, clone COLON2002520, highly similar to Myosin-14;cDNA FLJ56368, highly similar to Myosin-14;Myosin;cDNA FLJ16179 fis, clone BRHIP3000070, highly similar to Myosin-14	7.2546e-06	0.34351	0.97717						11.635
ADLLLSTQPGR	1169.64	IPI00604710	4F2 cell-surface antigen heavy chain;Lymphocyte activation antigen 4F2 large subunit;4F2 heavy chain antigen;cDNA FLJ54090, highly similar to 4F2 cell-surface antigen heavy chain	5.4093e-10	4.8385	0.68476	4.2187	1.8056	1.1273	6.337	2.1415	1.0635	2.4335
ADLLLSTQPGREEGSPLELER	2309.19	IPI00604710	4F2 cell-surface antigen heavy chain;Lymphocyte activation antigen 4F2 large subunit;4F2 heavy chain antigen;cDNA FLJ54090, highly similar to 4F2 cell-surface antigen heavy chain	1.5508e-30	1.3693	1.162	4.7863		4.0778	13.12	0.68266	1.328	2.2518
ADLNQGIGEPQSPSRR	1723.86	IPI00060181	EF-hand domain-containing protein D2;Swiprosin-1	0.0013022	0.49683	1.5342		2.2317			0.65281	0.57028
ADLPDQR	813.398	IPI00010491	Ras-related protein Rab-27B;C25KG;RAB27B, member RAS oncogene family;cDNA, FLJ94805, Homo sapiens RAB27B, member RAS oncogene family (RAB27B), mRNA	0.66426			2.6307			0.12359			0.77884
ADLPPCGACITGR	1386.64	IPI00010415	Cytosolic acyl coenzyme A thioester hydrolase;Long chain acyl-CoA thioester hydrolase;Acyl-CoA thioesterase 7;CTE-IIa;Brain acyl-CoA hydrolase;cDNA FLJ76231, highly similar to Homo sapiens brain acyl-CoA hydrolase (BACH), transcript varianthBACHb, mRNA;Acyl-CoA thioesterase 7, isoform CRA_b	2.4539e-08									0.42896
ADLRDNYSPGWK	1420.67	IPI00923606	cDNA FLJ58269, highly similar to Bifunctional aminoacyl-tRNA synthetase;Glutamyl-prolyl-tRNA synthetase;EPRS protein;Bifunctional aminoacyl-tRNA synthetase;Proliferation-inducing gene 32 protein;Glutamyl-tRNA synthetase;Glutamate--tRNA ligase;Prolyl-tRNA synthetase;Proline--tRNA ligase	0.001007	0.54224	0.37607		0.3348	0.18496		0.57208	0.51314
ADLSFIEDTVAFPEK	1680.82	IPI00219669	Carbonic anhydrase-related protein;Carbonic anhydrase VIII;cDNA FLJ78193, highly similar to Homo sapiens carbonic anhydrase VIII (CA8), mRNA;Carbonic anhydrase VIII, isoform CRA_c;cDNA, FLJ95360, Homo sapiens carbonic anhydrase VIII (CA8), mRNA;cDNA FLJ33336 fis, clone BRACE2000893, highly similar to CARBONIC ANHYDRASE-RELATED PROTEIN;cDNA FLJ57482, highly similar to Carbonic anhydrase-related pr…	0.0004557		0.090874
ADLSGITK	803.439	CON_00695489		0.0040364			0.021538	0.21907		0.22509	0.049674	0.8316	0.10709
ADLSGMSGAR	963.444	IPI00027444	Leukocyte elastase inhibitor;Monocyte/neutrophil elastase inhibitor;Serpin B1;cDNA FLJ76298, highly similar to Homo sapiens serpin peptidase inhibitor, clade B (ovalbumin), member 1 (SERPINB1), mRNA;cDNA FLJ57130, highly similar to Leukocyte elastase inhibitor;cDNA FLJ53963, highly similar to Leukocyte elastase inhibitor	0.0015713							0.16948	0.12866	0.30476
ADLSLADALTEPSPDIEGEIK	2183.08	IPI00396171	Microtubule-associated protein 4;cDNA FLJ58263, highly similar to Microtubule-associated protein 4;MAP4 protein	4.0961e-39		0.6528						0.43185
ADLSLADALTEPSPDIEGEIKR	2339.19	IPI00396171	Microtubule-associated protein 4;cDNA FLJ58263, highly similar to Microtubule-associated protein 4;MAP4 protein	2.6025e-37	0.69631	0.97461	0.49939			1.5021
ADLTAEMISAPLGDFR	1705.83	IPI00015894	Cdc42 effector protein 4;Binder of Rho GTPases 4;CDC42 effector protein (Rho GTPase binding) 4, isoform CRA_a;cDNA FLJ14479 fis, clone MAMMA1002143, highly similar to Cdc42 effector protein 4 (Binder of Rho GTPases 4);cDNA, FLJ92905, Homo sapiens CDC42 effector protein (Rho GTPase binding) 4(CDC42EP4), mRNA;cDNA FLJ40516 fis, clone TESTI2046569, highly similar to Cdc42 effector protein 4 (Binder …	0.0037254	1.016				0.82175	0.63569	1.4741
ADLTALFLPR	1115.63	IPI00031023	Protein flightless-1 homolog;cDNA FLJ50778, highly similar to Protein flightless-1 homolog;cDNA FLJ51784, highly similar to Protein flightless-1 homolog;Flightless I homolog variant;cDNA FLJ50164, highly similar to Protein flightless-1 homolog	1.1689e-09	0.65688	0.82403	0.46222	0.75882	1.1555	0.79468	0.4322	0.42622	0.3553
ADLTEYLSTHYK	1439.69	IPI00013847	Cytochrome b-c1 complex subunit 1, mitochondrial;Ubiquinol-cytochrome-c reductase complex core protein 1;Complex III subunit 1;Ubiquinol-cytochrome c reductase core protein I;cDNA, FLJ93573, highly similar to Homo sapiens ubiquinol-cytochrome c reductase core protein I(UQCRC1), mRNA;cDNA FLJ51625, highly similar to Ubiquinol-cytochrome-c reductase complex coreprotein I, mitochondrial (EC 1.10.2.2…	8.1906e-14	1.6335	0.57646	1.3605	0.35003	0.099441	0.3636	1.122	0.94823	1.5209
ADLTEYLSTHYKAPR	1763.88	IPI00013847	Cytochrome b-c1 complex subunit 1, mitochondrial;Ubiquinol-cytochrome-c reductase complex core protein 1;Complex III subunit 1;Ubiquinol-cytochrome c reductase core protein I;cDNA, FLJ93573, highly similar to Homo sapiens ubiquinol-cytochrome c reductase core protein I(UQCRC1), mRNA;cDNA FLJ51625, highly similar to Ubiquinol-cytochrome-c reductase complex coreprotein I, mitochondrial (EC 1.10.2.2…	4.4127e-06			1.981		0.31792	0.40132
ADLTHLLSPQMGK	1409.73	IPI00028357	Exportin-4;Exportin 4;XPO4 protein	0.00049402	0.72878	1.0501		1.0823	1.6457
ADLVISHAGAGSCLETLEK	1969.98	IPI00795917	Asparagine-linked glycosylation 13 homolog (S. cerevisiae);cDNA FLJ61626;cDNA FLJ52583;cDNA FLJ58392;UDP-N-acetylglucosamine transferase subunit ALG13 homolog;Glycosyltransferase 28 domain-containing protein 1;Glycosyltransferase 28 domain containing 1, isoform CRA_b;cDNA, FLJ92520, Homo sapiens uncharacterized hematopoietic stem/progenitor cellsprotein MDS031 (MDS031), mRNA	1.6961e-13	5.2368	3.4141	3.9104		1.1267
ADLVNAHVVPGSGVVK	1560.86	IPI00914059	Uridine monophosphate synthetase isoform G	5.1655e-27	1.6133			2.5079	3.8202
ADLYIHVTYIK	1334.72	IPI00787853	Inositol monophosphatase 3;Inositol-1(or 4)-monophosphatase 3;Myo-inositol monophosphatase A3;Inositol monophosphatase domain-containing protein 1	2.1196e-14	0.47266	0.96327	0.69192	0.19342	0.10807	0.22427	0.60919
ADMEDLMSSK	1125.47	IPI00790503	Myosin-10;Myosin heavy chain 10;Myosin heavy chain, non-muscle IIb;Non-muscle myosin heavy chain IIb;Cellular myosin heavy chain, type B;Non-muscle myosin heavy chain B;MYH10 protein;MYH10 variant protein;Nonmuscle myosin II heavy chain-B;Myosin, heavy chain 10, non-muscle;Nonmuscle myosin heavy chain IIB	0.0032763									0.35806
ADMETLQR	962.449	IPI00329633	Threonyl-tRNA synthetase, cytoplasmic;Threonine--tRNA ligase;cDNA FLJ75173, highly similar to Homo sapiens threonyl-tRNA synthetase, mRNA;Threonyl-tRNA synthetase, isoform CRA_b;cDNA, FLJ96812, highly similar to Homo sapiens threonyl-tRNA synthetase (TARS), mRNA;cDNA FLJ38533 fis, clone HCHON2001108, highly similar to Threonyl-tRNA synthetase, cytoplasmic (EC 6.1.1.3);TARS protein;cDNA FLJ53464, …	0.012674		0.81311	0.73066		1.1972	0.64186			0.62298
ADMGGAATICSAIVSAAK	1692.82	IPI00419237	Cytosol aminopeptidase;Leucine aminopeptidase;Leucyl aminopeptidase;Leucine aminopeptidase 3;Proline aminopeptidase;Prolyl aminopeptidase;Peptidase S;cDNA FLJ11993 fis, clone HEMBB1001429, highly similar to Cytosol aminopeptidase (EC 3.4.11.1);cDNA FLJ61331, highly similar to Cytosol aminopeptidase (EC 3.4.11.1);cDNA FLJ54122, highly similar to Cytosol aminopeptidase (EC 3.4.11.1)	7.1535e-62	1.0363	1.281		1.211	1.1131			1.2901
ADMQNLVER	1074.51	IPI00008274	Adenylyl cyclase-associated protein 1;Adenylyl cyclase-associated protein	3.6614e-11	0.2988	0.34604	0.24249		0.26603	0.37282		0.14645
ADMQNLVERLER	1472.74	IPI00008274	Adenylyl cyclase-associated protein 1;Adenylyl cyclase-associated protein	0.0003834		0.30873						0.10645
ADMVETQQLMR	1320.62	IPI00100980	EH domain-containing protein 2;EH-domain containing 2, isoform CRA_a;cDNA, FLJ96617, Homo sapiens EH-domain containing 2 (EHD2), mRNA;cDNA FLJ53453, highly similar to EH-domain-containing protein 2;cDNA FLJ55555, highly similar to EH-domain-containing protein 2;cDNA FLJ54154, highly similar to EH-domain-containing protein 2;cDNA, FLJ79347, highly similar to EH-domain-containing protein 2;cDNA FLJ…	0.00032915			0.14827
ADMVIEAVFEDLSLK	1678.85	IPI00031522	Trifunctional enzyme subunit alpha, mitochondrial;TP-alpha;78 kDa gastrin-binding protein;Long-chain enoyl-CoA hydratase;Long chain 3-hydroxyacyl-CoA dehydrogenase;Hydroxyacyl-Coenzyme A dehydrogenase/3-ketoacyl-Coenzyme A thiolase/enoyl-Coenzyme A hydratase (Trifunctional protein), alpha subunit, isoform CRA_a;cDNA, FLJ93497, Homo sapiens hydroxyacyl-Coenzyme A dehydrogenase/3-ketoacyl-Coenzyme …	6.4616e-42						0.79895
ADMWSFGITAIELATGAAPYHK	2349.15	IPI00004363	STE20/SPS1-related proline-alanine-rich protein kinase;Serine/threonine-protein kinase 39;DCHT;Putative uncharacterized protein STK39;Small intestine SPAK-like kinase	1.0361e-109	0.60349	1.0669					0.40663	0.36482
ADNAMNQCPVHFIQHGK	1965.89	IPI00456983	Probable phospholipid-transporting ATPase IH;ATPase class VI type 11A;ATPase IS;ATPase, Class VI, type 11A;ATP11A protein	0.033303							0.48888	0.2903
ADNEKLDNQR	1201.57	IPI00012578	Importin subunit alpha-4;Karyopherin subunit alpha-4;Importin alpha Q1;cDNA FLJ76805, highly similar to Homo sapiens karyopherin alpha 4 (importin alpha 3) (KPNA4), mRNA;Karyopherin alpha 4 (Importin alpha 3), isoform CRA_b	0.00023232						17.232
ADNFEYSDPVDGSISR	1770.77	IPI00219526	Phosphoglucomutase-1;Glucose phosphomutase 1;cDNA, FLJ92549, highly similar to Homo sapiens phosphoglucomutase 1 (PGM1), mRNA;cDNA FLJ50439, highly similar to Phosphoglucomutase-1 (EC 5.4.2.2);cDNA FLJ51818, highly similar to Phosphoglucomutase-1 (EC 5.4.2.2);cDNA FLJ50606, highly similar to Phosphoglucomutase-1 (EC 5.4.2.2);Phosphoglucomutase 1;cDNA FLJ50663, highly similar to Phosphoglucomutase…	2.1052e-50	0.18745	0.24032	0.14933		0.24253		0.058433	0.033573
ADNLSDTLKK	1103.58	IPI00855767	cDNA FLJ30470 fis, clone BRAWH1000040, highly similar to Rap1 GTPase-GDP dissociation stimulator 1;RAP1, GTP-GDP dissociation stimulator 1;cDNA FLJ54958, highly similar to Rap1 GTPase-GDP dissociation stimulator 1;RAP1GDS1 protein;GTP-GDP dissociation stimulator 1 isoform A	0.018797							0.3891		0.20863
ADPDVLTEVPAALK	1437.77	IPI00019977	General transcription factor IIE subunit 1;Transcription initiation factor IIE subunit alpha;General transcription factor IIE 56 kDa subunit;GTF2E1 protein;General transcription factor IIE, polypeptide 1 (Alpha subunit, 56kD) variant	0.020276	1.2964	1.3974
ADPECMLGHLLR	1410.67	IPI00329528	Protein VPRBP;HIV-1 Vpr-binding protein;Vpr-interacting protein;DDB1- and CUL4-associated factor 1;cDNA FLJ13177 fis, clone NT2RP3003870, highly similar to Homo sapiens Vpr-binding protein (VprBP), mRNA	1	1.5654	1.6704					1.7494		1.821
ADPEELFTK	1048.51	IPI00335281	Serine/threonine-protein kinase 24;STE20-like kinase MST3;Mammalian STE20-like protein kinase 3;cDNA FLJ60706, highly similar to Serine/threonine-protein kinase 24 (EC 2.7.11.1);cDNA FLJ61159, highly similar to Serine/threonine-protein kinase 24 (EC 2.7.11.1);Serine/threonine kinase 24 (STE20 homolog, yeast);Serine/threonine kinase 24 (STE20 homolog, yeast), isoform CRA_c;cDNA FLJ61383, highly si…	0.011466	1.7967	0.76327						0.40986	0.41303
ADPHCLNFLCNFGK	1691.75	IPI00009803	Integrin alpha-4;Integrin alpha-IV;VLA-4;CD49 antigen-like family member D;Alpha-4 integrin;Integrin alpha 4 variant;ITGA4 protein;Integrin alpha-4 subunit	0.0091633									0.10255
ADPMAPGVQGSLLHVPWR	1929.99	IPI00872454	Chromosome transmission fidelity protein 18 homolog;CTF18, chromosome transmission fidelity factor 18 homolog (S. cerevisiae);Protein CTF18 homolog.;CTF18, chromosome transmission fidelity factor 18 homolog (S. cerevisiae), isoform CRA_d;cDNA FLJ56678, highly similar to Homo sapiens CTF18, chromosome transmission fidelity factor 18 homolog, mRNA	0.056177	2.0334	2.1943	2.4347	2.4849	0.22604
ADPNGPVEGTVIESFTDK	1874.89	IPI00005039	Translation initiation factor IF-2, mitochondrial;MTIF2 protein;Similar to mitochondrial translational initiation factor 2	4.3803e-110	1.1022	1.3203			0.67074
ADPPKTHVTHHPVSDHEATLR	2344.17	IPI00655604	HLA class I histocompatibility antigen, B-53 alpha chain;MHC class I antigen B*53;Bw-53;HLA class I histocompatibility antigen, B-58 alpha chain;MHC class I antigen B*58;Bw-58;MHC class I antigen;HLA class I histocompatibility antigen, B-51 alpha chain;MHC class I antigen B*51;HLA class I histocompatibility antigen, B-52 alpha chain;MHC class I antigen B*52;Bw-52;HLA-B protein;HLA class I histoco…	0.067327			0.018046
ADPQDALR	884.435	IPI00022664	Geranylgeranyl transferase type-2 subunit alpha;Geranylgeranyl transferase type II subunit alpha;Rab geranylgeranyltransferase subunit alpha;Rab geranyl-geranyltransferase subunit alpha;cDNA FLJ50324, highly similar to Geranylgeranyl transferase type-2 alpha subunit (EC 2.5.1.60);RABGGTA protein	0.020806			1.0894				0.81872		0.50331
ADPSHFELLK	1155.59	IPI00477982	Putative uncharacterized protein RPS6KA1;cDNA FLJ76963, highly similar to Homo sapiens ribosomal protein S6 kinase, 90kDa, polypeptide 1 (RPS6KA1), transcript variant 2, mRNA;Ribosomal protein S6 kinase alpha-1;90 kDa ribosomal protein S6 kinase 1;p90-RSK 1;pp90RSK1;p90S6K;Ribosomal S6 kinase 1;MAP kinase-activated protein kinase 1a;Ribosomal protein S6 kinase, 90kDa, polypeptide 1, isoform CRA_b…	0.018797			0.37898				0.34825	0.21892	0.19683
ADPSILQNLR	1125.61	IPI00154668	Coiled-coil domain-containing protein 93;Putative uncharacterized protein FLJ10996;cDNA FLJ76711, highly similar to Homo sapiens coiled-coil domain containing 93, mRNA;Putative uncharacterized protein CCDC93	0.00029384							0.95796	0.94586
ADPSIVQALSLYDGLV	1659.87	IPI00219110	Neuronal calcium sensor 1;Frequenin homolog;Frequenin-like protein;Frequenin-like ubiquitous protein	0.0024877
ADPSLNPEQLK	1210.62	IPI00027009	Protein kinase C and casein kinase substrate in neurons protein 2;PACSIN2 protein;Protein kinase C and casein kinase substrate in neurons 2	0.0013428	0.43479	0.54351		0.95489	1.0442		0.84371		0.65066
ADPSLNPEQLKK	1338.71	IPI00027009	Protein kinase C and casein kinase substrate in neurons protein 2;PACSIN2 protein;Protein kinase C and casein kinase substrate in neurons 2	0.80098									0.53301
ADPTVESEEAFK	1321.6	IPI00014174	Mortality factor 4-like protein 2;MORF-related gene X protein;Transcription factor-like protein MRGX;MSL3-2 protein;cDNA FLJ31450 fis, clone NT2NE2000963, highly similar to Mortality factor 4-like protein 2;Mortality factor 4 like 2, isoform CRA_b;cDNA FLJ44127 fis, clone THYMU2006420, highly similar to Mortality factor 4-like protein 2;cDNA FLJ44463 fis, clone UTERU2024969, highly similar to Mor…	1.3268e-05			1.7095		0.75605		1.3121		5.6006
ADQAPFDTDVNTLTR	1662.78	IPI00073772	Fructose-1,6-bisphosphatase 1;D-fructose-1,6-bisphosphate 1-phosphohydrolase 1;Fructose 1,6-bisphosphatase;cDNA, FLJ94876, highly similar to Homo sapiens fructose-1,6-bisphosphatase 1 (FBP1), mRNA;Growth-inhibiting protein 17;cDNA FLJ75786, highly similar to Homo sapiens fructose-1,6-bisphosphatase 1 (FBP1), mRNA	2.3922e-48	16.591						9.5406	10.185
ADQCYEDVR	1154.47	IPI00010133	Coronin-1A;Coronin-like protein p57;Coronin-like protein A;Tryptophan aspartate-containing coat protein;Coronin, actin binding protein, 1A, isoform CRA_a;cDNA, FLJ95572, Homo sapiens coronin, actin binding protein, 1A (CORO1A), mRNA;cDNA FLJ57383, highly similar to Coronin-1A	4.5937e-05		1.2994	0.94049			2.2809			0.86585
ADQDRLDLEER	1358.64	IPI00291939	Structural maintenance of chromosomes protein 1A;SMC1alpha protein;Sb1.8;cDNA FLJ77162, highly similar to Homo sapiens SMC1 structural maintenance of chromosomes 1-like 1 (SMC1L1), mRNA;SMC1A protein;Putative uncharacterized protein DKFZp686L19178;cDNA FLJ50250, highly similar to Structural maintenance of chromosome 1-like 1 protein	0.044919			0.82006
ADQEEQIHPR	1221.57	IPI00008918	LIM domain and actin-binding protein 1;Epithelial protein lost in neoplasm;LIM domain and actin binding 1;LIM domain and actin binding 1, isoform CRA_b;cDNA, FLJ95246, Homo sapiens epithelial protein lost in neoplasm beta (EPLIN),mRNA;Epithelial protein lost in neoplasm beta variant;cDNA FLJ38853 fis, clone MESAN2010321, highly similar to LIM domain and actin-binding protein 1;cDNA FLJ55990, high…	0.018797			0.44374			0.26641			0.79179
ADQELLLYSHDNIICGITSVAFSK	2693.34	IPI00012451	Guanine nucleotide-binding protein subunit beta-4;Transducin beta chain 4;cDNA FLJ77654, highly similar to Homo sapiens guanine nucleotide binding protein (G protein), beta polypeptide 4 (GNB4), mRNA;cDNA FLJ11028 fis, clone PLACE1004128, highly similar to Guanine nucleotide-binding protein subunit beta 4;Guanine nucleotide binding protein (G protein), beta polypeptide 4, isoform CRA_a;cDNA FLJ57…	0.00046863			0.052332
ADQELLMYSHDNIICGITSVAFSR	2739.3	IPI00003348	Guanine nucleotide-binding protein G(I)/G(S)/G(T) subunit beta-2;Transducin beta chain 2;G protein subunit beta-2;GNB2 protein;cDNA FLJ77321, highly similar to Homo sapiens guanine nucleotide binding protein (G protein), beta polypeptide 2 (GNB2), mRNA;Guanine nucleotide binding protein (G protein), beta polypeptide 2, isoform CRA_a;cDNA FLJ32188 fis, clone PLACE6002056, highly similar to Guanine…	0.0012689			2.253			1.12
ADQFEYVMYGK	1349.6	IPI00003309	DNA-directed RNA polymerases I, II, and III subunit RPABC3;DNA-directed RNA polymerase II subunit H;DNA-directed RNA polymerases I, II, and III 17.1 kDa polypeptide;RPB17;hRPB8	2.1196e-14	1.4119		1.6083		0.69736	1.2548			2.5254
ADQFLVGTSR	1092.56	IPI00001466	Echinoderm microtubule-associated protein-like 4;Restrictedly overexpressed proliferation-associated protein;Ropp 120;EML4 protein;Putative uncharacterized protein EML4;cDNA FLJ55069, highly similar to Echinoderm microtubule-associated protein-like 4	0.02484	0.85102								0.84229
ADQGEKENPMR	1273.57	IPI00746438	60S ribosomal protein L11;CLL-associated antigen KW-12	0.0047897			1.0146			0.83251			0.76606
ADQIETQQLMR	1331.65	IPI00017184	EH domain-containing protein 1;Testilin;hPAST1;cDNA FLJ40523 fis, clone TESTI2046872, highly similar to EH-domain-containing protein 1;EH-domain containing 1, isoform CRA_b;cDNA, FLJ92624, highly similar to Homo sapiens EH-domain containing 1 (EHD1), mRNA;cDNA FLJ53363, highly similar to EH-domain-containing protein 1;cDNA FLJ53643, highly similar to EH-domain-containing protein 1;cDNA FLJ55347, …	3.8404e-06		0.51182	0.53692		1.2221		0.27037	0.4067	0.67006
ADQLTEEQIAEFK	1520.74	IPI00916768	Calmodulin;Calmodulin 1 (Phosphorylase kinase, delta), isoform CRA_a;cDNA FLJ61744, highly similar to Calmodulin;Calmodulin 3 (Phosphorylase kinase, delta), isoform CRA_b;CALM1 protein;LP7057 protein;Calmodulin 2 (Phosphorylase kinase, delta), isoform CRA_a;Calmodulin 3 (Phosphorylase kinase, delta), isoform CRA_a;cDNA FLJ75174, highly similar to Homo sapiens calmodulin 1 (phosphorylase kinase, d…	2.509e-19	0.81682	0.74018	0.40974	1.6388	0.60566	1.2748	0.8867
ADQLTEEQIAEFKEAFSLFDKDGDGTITTK	3346.61	IPI00916768	Calmodulin;Calmodulin 1 (Phosphorylase kinase, delta), isoform CRA_a;cDNA FLJ61744, highly similar to Calmodulin;Calmodulin 3 (Phosphorylase kinase, delta), isoform CRA_b;CALM1 protein;LP7057 protein;Calmodulin 2 (Phosphorylase kinase, delta), isoform CRA_a;Calmodulin 3 (Phosphorylase kinase, delta), isoform CRA_a;cDNA FLJ75174, highly similar to Homo sapiens calmodulin 1 (phosphorylase kinase, d…	3.8779e-94			0.75475			1.4437
ADQPKPISPLK	1192.68	IPI00013957	Mitochondrial carnitine/acylcarnitine carrier protein;Carnitine/acylcarnitine translocase;Solute carrier family 25 member 20;cDNA FLJ53016, highly similar to Mitochondrial carnitine/acylcarnitine carrier protein	0.0047897	2.3101	0.99751		0.34872	0.25012		0.86374		0.35723
ADRDESSPYAAMLAAQDVAQR	2264.05	IPI00026271	40S ribosomal protein S14;Ribosomal protein S14, isoform CRA_a;cDNA, FLJ92466, Homo sapiens ribosomal protein S14 (RPS14), mRNA	1.1931e-15	1.3393	1.5336	1.2321		1.6796	1.3336	0.96774	1.0431	1.0815
ADRDGDKMAPSVEK	1517.71	IPI00456969	Cytoplasmic dynein 1 heavy chain 1;Cytoplasmic dynein heavy chain 1;Dynein heavy chain, cytosolic;cDNA FLJ52684, highly similar to Dynein heavy chain, cytosolic;Dynein heavy chain;Cytoplasmic dynein heavy chain	1			0.33357
ADRETVAVKPTENNEEEFTSK	2393.13	IPI00299254	Eukaryotic translation initiation factor 5B;Translation initiation factor IF-2;EIF5B protein;cDNA FLJ10524 fis, clone NT2RP2000880, highly similar to Eukaryotic translation initiation factor 5B;Putative uncharacterized protein IF2	0.0045393	1.129	2.4641			2.7956				0.64841
ADSAVSQEQLR	1202.59	IPI00329572	Protein kinase C and casein kinase substrate in neurons protein 3;SH3 domain-containing protein 6511;Endophilin I;cDNA FLJ61415, highly similar to Protein kinase C and casein kinase substratein neurons protein 3	8.5931e-21			3.3659			1.359		0.79842	1.9331
ADSELQLVEQR	1286.65	IPI00218693	Adenine phosphoribosyltransferase	0.0013428	1.2796	1.2706	1.2368		1.1836	1.1827	1.7579	1.3742
ADSGLLLK	815.475	IPI00002902	Nucleolar protein 9	0.10158	1.7724	1.7207	1.5832	1.3599	1.5324	1.3533		1.2868	1.3666
ADSGPTQPPLSLSPAPETK	1891.95	IPI00641384	Protein transport protein Sec16A;Protein SEC16 homolog A;SEC16A protein;Putative uncharacterized protein SEC16A;cDNA FLJ52782;cDNA, FLJ79093;SEC16 homolog A (S. cerevisiae)	1.6961e-13				0.36093	0.34189
ADSILAYHQQNVPR	1610.82	IPI00328798	B-cell CLL/lymphoma 9-like protein;Protein BCL9-2;Putative uncharacterized protein BCL9L	0.00071338	1.4509		1.7478	1.9073	1.3133	1.8454	1.2071		2.2885
ADSLLAVVK	914.544	IPI00005648	Scaffold attachment factor B2;SAFB2 protein;Putative uncharacterized protein SAFB2;cDNA FLJ57435, highly similar to Scaffold attachment factor B2;SAFB protein;Scaffold attachment factor B;cDNA FLJ76656, highly similar to Homo sapiens scaffold attachment factor B (SAFB), mRNA;cDNA FLJ59451, highly similar to Scaffold attachment factor B;cDNA FLJ54744, highly similar to Scaffold attachment factor B…	0.0049144			1.0779	0.47894		1.2438	1.0071		1.6302
ADSLLEDITDIPK	1428.73	IPI00304754	Fermitin family homolog 1;Unc-112-related protein 1;Kindlin-1;Kindlerin;Kindlin syndrome protein;cDNA, FLJ95169;FERMT1 protein;DTGCU2;Chromosome 20 open reading frame 42	1.2376e-11								0.021187
ADSLSSLVTR	1047.56	IPI00015117	Laminin subunit gamma-2;Laminin 5 gamma 2 subunit;Kalinin/nicein/epiligrin 100 kDa subunit;Laminin B2t chain;Cell-scattering factor 140 kDa subunit;Large adhesive scatter factor 140 kDa subunit;Ladsin 140 kDa subunit;Laminin, gamma 2;cDNA FLJ57342, highly similar to Laminin gamma-2 chain;Laminin, gamma 2, isoform CRA_a	0.00023232			0.038019					0.0544	0.021234
ADSRDPASDQMQHWK	1770.77	IPI00465436	Catalase;Similar to catalase	4.4127e-06	0.65995				0.36579
ADSSSVLPSPLSISTK	1587.84	IPI00307257	TBC1 domain family member 9B;cDNA FLJ10611 fis, clone NT2RP2005315, highly similar to Homo sapiens KIAA0676 protein;TBC1 domain family, member 9B;TBC1 domain family, member 9B (With GRAM domain);cDNA FLJ10334 fis, clone NT2RM2000649, highly similar to Homo sapiens KIAA0676 protein;cDNA FLJ90310 fis, clone NT2RP2001200, highly similar to Homo sapiens KIAA0676 protein;TBC1D9B protein	1.0304e-21	1.5109	0.84519		1.1066	0.95612		2.1512		1.1754
ADSVDVEVRVPENHASK	1850.91	IPI00410351	cDNA FLJ50924, highly similar to Nuclear receptor corepressor 1;Nuclear receptor co-repressor;NCOR isoform c;NCOR isoform d;Nuclear receptor corepressor 1;cDNA FLJ52302, highly similar to Nuclear receptor corepressor 1;Putative uncharacterized protein DKFZp434M075;NCOR1 protein;Nuclear receptor co-repressor 1, isoform CRA_b;NCOR isoform b	0.48153	0.32958
ADSVSSSNIK	1006.49	IPI00782974	Uncharacterized protein C17orf85;Protein ELG;cDNA FLJ43058 fis, clone BRTHA3007472, highly similar to Homo sapiens ELG protein (HSA277841), mRNA;ELG protein, isoform CRA_c	1			1.9672				0.55021	0.1336
ADSVVVLLCR	1130.61	IPI00034049	Regulator of nonsense transcripts 1;ATP-dependent helicase RENT1;Nonsense mRNA reducing factor 1;Up-frameshift suppressor 1 homolog;cDNA FLJ46894 fis, clone UTERU3019708, highly similar to Regulator of nonsense transcripts 1;PNORF1	1.0082e-05	1.1321	1.1111	0.9486	0.78158	1.4029	1.2442	1.376	1.1846	1.3146
ADSWVEKEEPAPSN	1557.69	IPI00182757	Protein KIAA1967;Deleted in breast cancer gene 1 protein;p30 DBC;cDNA FLJ38393 fis, clone FEBRA2007212	0.00071338			2.0219			1.2055			1.1403
ADSYYEYLLK	1263.6	IPI00008207	Endoplasmic reticulum mannosyl-oligosaccharide 1,2-alpha-mannosidase;ER alpha-1,2-mannosidase;Mannosidase alpha class 1B member 1;Man9GlcNAc2-specific-processing alpha-mannosidase;cDNA FLJ90218 fis, clone MAMMA1002586, highly similar to Endoplasmic reticulummannosyl-oligosaccharide 1,2-alpha-mannosidase (EC 3.2.1.113);Mannosidase, alpha, class 1B, member 1, isoform CRA_b;cDNA FLJ60321, highly sim…	0.012569			1.4016			0.4752			1.093
ADTDGGLIFR	1063.53	IPI00029275	Melanotransferrin;Melanoma-associated antigen p97	0.00023232			0.1579
ADTGLFSR	865.429	IPI00073096	Tripartite motif-containing protein 29;Ataxia-telangiectasia group D-associated protein;cDNA FLJ52736, highly similar to Tripartite motif-containing protein 29;cDNA FLJ60841, highly similar to Tripartite motif-containing protein 29;cDNA FLJ52831, highly similar to Tripartite motif-containing protein 29;TRIM29 protein;Tripartite motif protein TRIM29 isoform alpha variant	0.0040364			0.14367						0.075369
ADTLDPALLRPGR	1393.77	IPI00020042	26S protease regulatory subunit 6B;Proteasome 26S subunit ATPase 4;MB67-interacting protein;MIP224;TAT-binding protein 7;cDNA FLJ78505, highly similar to Homo sapiens proteasome (prosome, macropain) 26S subunit, ATPase, 4 (PSMC4), transcript variant 1, mRNA;Proteasome (Prosome, macropain) 26S subunit, ATPase, 4, isoform CRA_b;cDNA, FLJ93682, Homo sapiens proteasome (prosome, macropain) 26S subuni…	0.28793	0.98152		1.2683	1.1374	1.5025				0.90264
ADTLTDEINFLR	1406.7	IPI00300725	Keratin, type II cytoskeletal 6A;Cytokeratin-6A;K6a keratin;Cytokeratin-6D;cDNA FLJ78504, highly similar to Homo sapiens keratin 6A (KRT6A), mRNA;cDNA FLJ54657, highly similar to Keratin, type II cytoskeletal 6A;cDNA FLJ51361, highly similar to Keratin, type II cytoskeletal 6A;cDNA FLJ53910, highly similar to Keratin, type II cytoskeletal 6A;Keratin, type II cytoskeletal 6B;Cytokeratin-6B;K6b ker…	2.618e-15	0.070236	0.20145	0.045892				0.00031156	0.0004223	0.021887
ADTLTLEER	1046.52	IPI00871679	Ovarian/Breast septin epsilon;cDNA FLJ54900, highly similar to Septin-9;Septin 9, isoform CRA_b;cDNA FLJ75490, highly similar to Homo sapiens septin 9, mRNA;Septin 9, isoform CRA_f;cDNA FLJ31933 fis, clone NT2RP7006304, highly similar to Septin-9;MAFK protein;cDNA FLJ55268, highly similar to Septin-9;Septin 9, isoform CRA_c;cDNA FLJ58686, highly similar to Septin-9;cDNA, FLJ79372, highly similar …	0.011466	0.99971	1.1691	1.0805	0.95905	0.81604	0.97007
ADTLTPEECQQFK	1565.7	IPI00941534	Septin-7;CDC10 protein homolog;cDNA FLJ75185;Predicted protein product of Nbla02942;CDC10 protein variant;Putative uncharacterized protein DKFZp686F17268;cDNA FLJ53636, highly similar to Septin-7;cDNA FLJ54551, highly similar to Septin-7;SEPT7 protein;Septin 7;cDNA FLJ52574, highly similar to Septin-7;Putative uncharacterized protein DKFZp586I031	3.6459e-34	0.8357				0.94597	0.82662			0.43509
ADTLTPEECQQFKK	1693.8	IPI00941534	Septin-7;CDC10 protein homolog;cDNA FLJ75185;Predicted protein product of Nbla02942;CDC10 protein variant;Putative uncharacterized protein DKFZp686F17268;cDNA FLJ53636, highly similar to Septin-7;cDNA FLJ54551, highly similar to Septin-7;SEPT7 protein;Septin 7;cDNA FLJ52574, highly similar to Septin-7;Putative uncharacterized protein DKFZp586I031	0.27635	0.88788	1.9535	0.99163		1.1187	1.0508	0.77402		0.44582
ADTMQNIESTIVELGSIFQQLAHMVK	2902.46	IPI00744834	Syntaxin-5;Putative uncharacterized protein STX5;cDNA FLJ57518, highly similar to Syntaxin-5;Syntaxin 5A, isoform CRA_c	0.053784							1.4621
ADTNLGNILLNVLIPPNMPCTR	2435.27	IPI00026940	Nucleoporin 50 kDa;Nuclear pore-associated protein 60 kDa-like;HCG1989366, isoform CRA_a;cDNA, FLJ95255, Homo sapiens nucleoporin 50kDa (NUP50), transcript variant 2, mRNA;cDNA FLJ54237, highly similar to Nucleoporin 50 kDa;NUP50 protein;Nucleoporin 50kDa;HCG1989366, isoform CRA_c	0.17779	0.39964
ADTPSLGEGPEK	1199.57	IPI00943192	Syntaxin-binding protein 2;Unc-18 homolog 2;Unc-18B;Hunc18b2;STXBP2 protein;Syntaxin binding protein 2;Syntaxin binding protein 2, isoform CRA_b;cDNA FLJ54775, highly similar to Syntaxin-binding protein 2;Syntaxin binding protein 2 variant;cDNA FLJ53447, highly similar to Syntaxin-binding protein 2	0.026099						0.5772
ADTQTYQPYNK	1327.6	IPI00029631	Enhancer of rudimentary homolog;Enhancer of rudimentary homolog (Drosophila), isoform CRA_a;cDNA, FLJ92473, Homo sapiens enhancer of rudimentary homolog (Drosophila) (ERH),mRNA	0.0047897				0.94886					1.0561
ADTQTYQPYNKDWIK	1869.89	IPI00029631	Enhancer of rudimentary homolog;Enhancer of rudimentary homolog (Drosophila), isoform CRA_a;cDNA, FLJ92473, Homo sapiens enhancer of rudimentary homolog (Drosophila) (ERH),mRNA	0.0004557			0.9109			0.92726			1.4018
ADTQTYQPYNKDWIKEK	2127.03	IPI00029631	Enhancer of rudimentary homolog;Enhancer of rudimentary homolog (Drosophila), isoform CRA_a;cDNA, FLJ92473, Homo sapiens enhancer of rudimentary homolog (Drosophila) (ERH),mRNA	0.91637			0.8048			0.73944
ADTQYILPNDIGVSSLDCR	2136.02	IPI00020672	Dipeptidyl-peptidase 3;Dipeptidyl-peptidase III;Dipeptidyl aminopeptidase III;Dipeptidyl arylamidase III;cDNA FLJ54021, highly similar to Dipeptidyl-peptidase 3 (EC 3.4.14.4);cDNA FLJ53282, highly similar to Dipeptidyl-peptidase 3 (EC 3.4.14.4);Dipeptidylpeptidase III isoform 1 variant;Putative uncharacterized protein DKFZp686O1117	4.9214e-50	1.0351	1.5544					1.6359	1.5187
ADTSSQGALVFLSK	1422.74	IPI00002349	Nuclear fragile X mental retardation-interacting protein 2;FMRP-interacting protein 2;82 kDa FMRP-interacting protein;Cell proliferation-inducing gene 1 protein;Nuclear fragile X mental retardation protein interacting protein 2;Nuclear fragile X mental retardation protein interacting protein 2, isoform CRA_a;cDNA FLJ75095, highly similar to Homo sapiens 82-kD FMRP Interacting Protein (182-FIP), m…	1.8407e-21	1.7618	1.2269		0.7233	1.1466		0.85065	1.2755	1.0724
ADVAFHFNPR	1172.57	IPI00165587	Galectin-8;Prostate carcinoma tumor antigen 1;Po66 carbohydrate-binding protein;Lectin, galactoside-binding, soluble, 8;Lymphocyte/NHL galectin-8 long isoform;Colorectal carcinoma-derived galectin-8 variant II;Galectin-8 variant;Galectin-8g;Lymphocyte/NHL galectin-8 short isoform	0.012569	0.9462		1.5701	0.28381	0.27257	0.25202		1.0892	1.8452
ADVDISGPK	900.455	IPI00021812	Neuroblast differentiation-associated protein AHNAK;Desmoyokin;cDNA FLJ57801, highly similar to Homo sapiens AHNAK nucleoprotein (desmoyokin) (AHNAK), transcript variant 1, mRNA;AHNAK-related protein;cDNA FLJ46846 fis, clone UTERU3004635, moderately similar to Neuroblast differentiation associated protein AHNAK;cDNA FLJ33834 fis, clone CTONG2004264, moderately similar to NEUROBLAST DIFFERENTIATIO…	1		0.62606
ADVDKIIQEPPHKK	1616.89	IPI00247871	Transcription elongation regulator 1;TATA box-binding protein-associated factor 2S;Transcription factor CA150;cDNA FLJ61669, highly similar to Transcription elongation regulator 1	0.057067			0.82511			0.7708			1.2193
ADVDVQPYAFTTK	1453.71	IPI00385042	Nucleolar GTP-binding protein 1;Chronic renal failure gene protein;GTP-binding protein NGB;cDNA FLJ10686 fis, clone NT2RP3000252, highly similar to Nucleolar GTP-binding protein 1;cDNA FLJ53992, highly similar to Nucleolar GTP-binding protein 1;cDNA FLJ56266, highly similar to Nucleolar GTP-binding protein 1;cDNA FLJ55652, highly similar to Nucleolar GTP-binding protein 1;G protein-binding protei…	1.4349e-12	1.1531	0.93813							2.5611
ADVDVSGPK	886.44	IPI00021812	Neuroblast differentiation-associated protein AHNAK;Desmoyokin;cDNA FLJ57801, highly similar to Homo sapiens AHNAK nucleoprotein (desmoyokin) (AHNAK), transcript variant 1, mRNA;AHNAK-related protein;cDNA FLJ46846 fis, clone UTERU3004635, moderately similar to Neuroblast differentiation associated protein AHNAK;cDNA FLJ33834 fis, clone CTONG2004264, moderately similar to NEUROBLAST DIFFERENTIATIO…	4.5937e-05		0.72913	0.36077	1.0029		0.55351			0.17139
ADVDVSGPKVDVEVPDVSLEGPEGK	2536.25	IPI00021812	Neuroblast differentiation-associated protein AHNAK;Desmoyokin;cDNA FLJ57801, highly similar to Homo sapiens AHNAK nucleoprotein (desmoyokin) (AHNAK), transcript variant 1, mRNA;AHNAK-related protein;cDNA FLJ46846 fis, clone UTERU3004635, moderately similar to Neuroblast differentiation associated protein AHNAK;cDNA FLJ33834 fis, clone CTONG2004264, moderately similar to NEUROBLAST DIFFERENTIATIO…	1.7875e-06			0.29323			0.43841
ADVFHAYLSLLK	1375.75	IPI00100160	Cullin-associated NEDD8-dissociated protein 1;Cullin-associated and neddylation-dissociated protein 1;p120 CAND1;TBP-interacting protein TIP120A;TBP-interacting protein of 120 kDa A;cDNA FLJ77762, highly similar to Homo sapiens cullin-associated and neddylation-dissociated 1 (CAND1), mRNA;Cullin-associated and neddylation-dissociated 1, isoform CRA_b;cDNA, FLJ95126, Homo sapiens TBP-interacting p…	9.622e-20	0.24723	0.58401	0.26949	1.32	1.6828	1.0495	1.4618	1.0698	1.0866
ADVIPVHYYLIPPPTK	1822	IPI00020416	Tripeptidyl-peptidase 2;Tripeptidyl-peptidase II;Tripeptidyl aminopeptidase;cDNA FLJ61714, highly similar to Tripeptidyl-peptidase 2 (EC 3.4.14.10)	0.0013022	0.24545		0.38803		0.14206	0.53505			0.38129
ADVIQATGDAICIFR	1648.82	IPI00005154	FACT complex subunit SSRP1;Facilitates chromatin transcription complex subunit SSRP1;FACT 80 kDa subunit;FACTp80;Chromatin-specific transcription elongation factor 80 kDa subunit;Structure-specific recognition protein 1;Recombination signal sequence recognition protein 1;T160	5.0621e-54	0.72275	0.71536	1.3232	0.96645	0.76721	1.1613			2.1659
ADVLDLHEAGGEDFAMDEDGDESIHK	2814.19	IPI00001757	RNA-binding protein 8A;RNA-binding motif protein 8A;Ribonucleoprotein RBM8A;RNA-binding protein Y14;Binder of OVCA1-1;RBM8A protein	5.4662e-92	0.84388	0.55684			1.0186
ADVLSEEAILK	1186.64	IPI00022305	Basic leucine zipper and W2 domain-containing protein 2;Basic leucine zipper and W2 domains 2;Basic leucine zipper and W2 domains 2, isoform CRA_a;cDNA FLJ10398 fis, clone NT2RM4000349, highly similar to Homo sapiens basic leucine zipper and W2 domains 2 (BZW2), mRNA;Putative uncharacterized protein BZW2;cDNA FLJ52869, highly similar to Homo sapiens basic leucine zipper and W2 domains 2 (BZW2), m…	2.1196e-14		2.3916	1.8348	0.20948	0.91047	0.83745			1.8152
ADVLSVLR	871.513	IPI00300659	Parafibromin;Cell division cycle protein 73 homolog;Hyperparathyroidism 2 protein;cDNA FLJ57893, highly similar to Parafibromin	0.020806	1.3045		1.7121		0.89929	1.4901	1.2841	1.6278
ADVLTTGAGNPVGDK	1413.71	IPI00465436	Catalase;Similar to catalase	2.1501e-16	0.75484	0.80819	0.58368		0.44332		1.4174	0.9358
ADVLTTGAGNPVGDKLNVITVGPR	2363.28	IPI00465436	Catalase;Similar to catalase	2.8581e-41			0.54291			0.27021			1.0238
ADVQSIIGLQR	1198.67	IPI00438229	Transcription intermediary factor 1-beta;Tripartite motif-containing protein 28;Nuclear corepressor KAP-1;KRAB-associated protein 1;KRAB-interacting protein 1;RING finger protein 96;cDNA, FLJ94025, highly similar to Homo sapiens tripartite motif-containing 28 (TRIM28), mRNA	5.4093e-10	0.97306	1.0684	1.0311	1.9179	2.9262	2.0241	2.3236	2.9039	3.1981
ADVSLPSMQGDLK	1359.67	IPI00856045	Protein AHNAK2	8.8378e-07		0.016272	0.24004						0.1033
ADVSSTGQGVIDK	1275.63	IPI00748532	Nuclear receptor coactivator 3;Thyroid hormone receptor activator molecule 1;Receptor-associated coactivator 3;Amplified in breast cancer-1 protein;Steroid receptor coactivator protein 3;CBP-interacting protein;Nuclear receptor coactivator 3, isoform CRA_c;cDNA FLJ77005, highly similar to Homo sapiens nuclear receptor coactivator 3 (NCOA3), transcript variant 1, mRNA;Nuclear receptor coactivator …	4.8196e-06		2.1607						0.040463
ADVVDSETVVR	1188.6	IPI00827597	Epithelial splicing regulatory protein 2;RNA-binding protein 35B;RNA-binding motif protein 35B	2.1196e-14	2.5092	3.327	4.2508		1.5279	1.6362		2.3138	5.5527
ADVVVGK	686.396	IPI00010158	Chromatin accessibility complex protein 1;CHRAC-15;HuCHRAC15;DNA polymerase epsilon subunit p15	0.14153			0.7311			1.8125
ADVVVSGPK	870.481	IPI00021812	Neuroblast differentiation-associated protein AHNAK;Desmoyokin;cDNA FLJ57801, highly similar to Homo sapiens AHNAK nucleoprotein (desmoyokin) (AHNAK), transcript variant 1, mRNA;AHNAK-related protein;cDNA FLJ46846 fis, clone UTERU3004635, moderately similar to Neuroblast differentiation associated protein AHNAK;cDNA FLJ33834 fis, clone CTONG2004264, moderately similar to NEUROBLAST DIFFERENTIATIO…	0.023472			0.2662	0.63842					0.11625
ADWALR	730.376	IPI00011118	Ribonucleoside-diphosphate reductase subunit M2 B;TP53-inducible ribonucleotide reductase M2 B;p53-inducible ribonucleotide reductase small subunit 2-like protein;cDNA FLJ52060, highly similar to Ribonucleoside-diphosphate reductase M2 subunit B (EC 1.17.4.1);Ribonucleotide reductase M2 B (TP53 inducible), isoform CRA_c;Putative uncharacterized protein DKFZp686M05248;Ribonucleoside-diphosphate re…	0.60523			0.59441						0.77933
ADWLSHYWMPK	1432.66	IPI00554777	Asparagine synthetase [glutamine-hydrolyzing];Glutamine-dependent asparagine synthetase;Cell cycle control protein TS11;Asparagine synthetase;HCG18251, isoform CRA_a;cDNA FLJ51768, highly similar to Asparagine synthetase (glutamine-hydrolyzing) (EC 6.3.5.4);cDNA FLJ51387, highly similar to Asparagine synthetase (glutamine-hydrolyzing) (EC 6.3.5.4);cDNA, FLJ79123, highly similar to Asparagine synt…	1.8884e-88	3.5397	2.6302	3.0808		5.9606	3.7044	3.1131	2.6598	5.2477
ADWWTNTAHYNR	1533.67	IPI00007928	Pre-mRNA-processing-splicing factor 8;Splicing factor Prp8;PRP8 homolog;220 kDa U5 snRNP-specific protein;p220;cDNA FLJ57882, highly similar to Pre-mRNA-processing-splicing factor 8;U5 snRNP-specific protein variant;Apoptosis-regulated protein 1;Apoptosis-regulated protein 2	1.5141e-09	1.3692	1.0147	1.0534	0.94422	1.3288			2.364	1.8415
ADYDTLSLR	1052.51	IPI00026952	Plakophilin-3	4.5937e-05	1.335		1.4714		0.50632	1.2848	1.035		0.93764
ADYEIASK	895.429	IPI00006932	Putative RNA-binding protein Luc7-like 2;cDNA FLJ36545 fis, clone TRACH2006670, highly similar to RNA-binding protein Luc7-like 2;cDNA FLJ55988, highly similar to RNA-binding protein Luc7-like 2;cDNA FLJ55994, highly similar to RNA-binding protein Luc7-like 2;cDNA FLJ34725 fis, clone MESAN2005958, highly similar to RNA-binding protein Luc7-like 2;cDNA FLJ36762 fis, clone UTERU2018955, highly simi…	1			0.85691						1.8207
ADYTSHLR	961.462	IPI00001159	Translational activator GCN1;GCN1-like protein 1;cDNA FLJ54481, highly similar to GCN1-like protein 1	0.36623				0.95696
AEAAAVAGLSTPGSLHR	1606.84	IPI00217393	Arf-GAP, GTPase, ANK repeat and PH domain-containing protein 2;Centaurin-gamma-1;Phosphatidylinositol-3-kinase enhancer;GTP-binding and GTPase-activating protein 2;cDNA FLJ16430 fis, clone BRACE3009044, highly similar to Centaurin-gamma 1;cDNA FLJ77626, highly similar to Homo sapiens centaurin, gamma 1 (CENTG1), mRNA;Centaurin, gamma 1, isoform CRA_b	1.036e-13								7.1565
AEAAGLIGWLK	1127.63	IPI00297241	Nucleolar pre-ribosomal-associated protein 1;Putative uncharacterized protein URB1	2.1196e-14			0.83789			1.0443			2.3328
AEAALLLLPEAAAER	1536.85	IPI00414858	Conserved oligomeric Golgi complex subunit 3;Component of oligomeric Golgi complex 3;Vesicle-docking protein SEC34 homolog;p94;cDNA, FLJ95160, highly similar to Homo sapiens component of oligomeric golgi complex 3 (COG3), mRNA;cDNA FLJ53596, highly similar to Conserved oligomeric Golgi complex component 3;cDNA FLJ53277, highly similar to Conserved oligomeric Golgi complex component 3	4.4127e-06						0.55628
AEAAPPLRPEHFAK	1532.81	IPI00884928	Calmodulin-regulated spectrin-associated protein 1;Calmodulin regulated spectrin-associated protein 1;CAMSAP1 protein	0.6461	1.5266
AEACFSLPFFAPLGLQGSINHK	2403.2	IPI00166200	Gasdermin-A;Gasdermin-1	1.7563e-05								0.014778
AEACFVNCVER	1353.58	IPI00028376	Mitochondrial import inner membrane translocase subunit Tim8 A;Deafness dystonia protein 1;X-linked deafness dystonia protein;Translocase of inner mitochondrial membrane 8 homolog A (Yeast), isoform CRA_b;cDNA, FLJ92399, Homo sapiens translocase of inner mitochondrial membrane 8 homologA (yeast) (TIMM8A), nuclear gene encoding mitochondrial protein,mRNA	0.0047813									1.6656
AEACVCTYNGQR	1427.59	IPI00103397	Mucin-5AC;Mucin-5 subtype AC, tracheobronchial;Tracheobronchial mucin;Major airway glycoprotein;Gastric mucin;Lewis B blood group antigen;Mucin	5.4516e-09						0.07531
AEADVSLPSMQGDLK	1559.75	IPI00856045	Putative uncharacterized protein ENSP00000381351;Protein AHNAK2	2.3814e-14	0.3056	0.090293	0.07136				0.16776	0.12651
AEAEAGSPRPDPR	1351.65	IPI00010951	Epiplakin;450 kDa epidermal antigen;Putative uncharacterized protein DKFZp434G0719	4.8196e-06		1.1556	0.62442	1.8753	1.141	1.8011	0.92758	3.6126	3.4005
AEAEAQAEELSFPR	1546.73	IPI00299402	Pyruvate carboxylase, mitochondrial;Pyruvic carboxylase	6.159e-11	0.64785	1.9165			1.4402		1.0104
AEAEAWYQTK	1195.55	CON_IPI00847342	Keratin, type II cytoskeletal 7;Cytokeratin-7;Sarcolectin;KRT7 protein;Putative uncharacterized protein	1.8732e-15						0.036773	0.0031789
AEAEESPGDPGTASPR	1569.69	IPI00061403	Protein YIPF6;YIP1 family member 6;cDNA FLJ76634, highly similar to Homo sapiens Yip1 domain family, member 6 (YIPF6), mRNA;Yip1 domain family, member 6;cDNA FLJ53127, highly similar to Protein YIPF6	0.020383					0.41859
AEAEGESLESWLNK	1561.73	IPI00021174	ADP-ribosylation factor-binding protein GGA3;Golgi-localized, gamma ear-containing, ARF-binding protein 3;cDNA FLJ75092, highly similar to Homo sapiens golgi associated, gamma adaptin ear containing, ARF binding protein 3 (GGA3), transcript variant long, mRNA;cDNA FLJ75879, highly similar to Homo sapiens GGA3 short isoform;cDNA FLJ58553, highly similar to ADP-ribosylation factor-binding protein G…	8.8485e-20					0.28805	0.41396
AEAELLQQQK	1156.61	IPI00014898	Plectin-1;Hemidesmosomal protein 1;Similar to plectin 1, intermediate filament binding protein, 500kD;HCG1994702;Plectin isoform 1b	1.8726e-13		0.77691	0.35429	1.0655	2.2977		0.19838	0.20907	0.17206
AEAERPEEQAEASGLKK	1841.91	IPI00237884	A-kinase anchor protein 12;A-kinase anchor protein 250 kDa;Gravin;Myasthenia gravis autoantigen;AKAP12 protein;Putative uncharacterized protein AKAP12;Putative uncharacterized protein DKFZp686M0430	0.0059611		0.44971					0.29581
AEAERVLAEK	1114.6	IPI00014898	Plectin-1;Hemidesmosomal protein 1;Similar to plectin 1, intermediate filament binding protein, 500kD;HCG1994702;Plectin isoform 1b	0.018797				0.93081			0.26476
AEAESLYQSK	1124.54	IPI00220327	Keratin, type II cytoskeletal 1;Cytokeratin-1;Keratin-1;67 kDa cytokeratin;Hair alpha protein	7.6147e-07		0.24148			0.010361				0.065075
AEAESMYQIK	1168.54	IPI00554648	Keratin, type II cytoskeletal 8;Cytokeratin-8;Keratin-8;cDNA FLJ77754, highly similar to Homo sapiens keratin 8 (KRT8), mRNA;Keratin 8, isoform CRA_c;cDNA, FLJ79475, highly similar to Keratin, type II cytoskeletal 8;KRT8 protein;Keratin-8-like protein 1.	1.2047e-28	10.81	7.9464	6.2043		5.0146	3.7558	13.07	20.122	10.392
AEAESMYQIKYEELQSLAGK	2287.1	IPI00554648	Keratin, type II cytoskeletal 8;Cytokeratin-8;Keratin-8;cDNA FLJ77754, highly similar to Homo sapiens keratin 8 (KRT8), mRNA;Keratin 8, isoform CRA_c;cDNA, FLJ79475, highly similar to Keratin, type II cytoskeletal 8;KRT8 protein	1.9054e-31			0.63655		0.57984	3.9324		0.55372
AEAESWYQTK	1211.55	IPI00300725	Keratin, type II cytoskeletal 6A;Cytokeratin-6A;K6a keratin;Cytokeratin-6D;cDNA FLJ78504, highly similar to Homo sapiens keratin 6A (KRT6A), mRNA;cDNA FLJ54657, highly similar to Keratin, type II cytoskeletal 6A;cDNA FLJ51361, highly similar to Keratin, type II cytoskeletal 6A;cDNA FLJ53910, highly similar to Keratin, type II cytoskeletal 6A;Keratin, type II cytoskeletal 79;Cytokeratin-79;Keratin…	3.078e-11			0.029393				0.015267		0.076542
AEAESWYR	1010.45	CON_103456	Keratin, type II cuticular Hb1;Type II hair keratin Hb1;Keratin, hair, basic, 1;ghHKb1;Keratin-81;K2.9;MLN 137;Keratin, type II cuticular Hb6;Type II hair keratin Hb6;Keratin-86;K2.11;cDNA FLJ77849, highly similar to Homo sapiens keratin, hair, basic, 6 (monilethrix) (KRTHB6), mRNA;cDNA FLJ55910, highly similar to Keratin, type II cuticular Hb6;Type II keratin;Type II basic hair keratin;Type II h…	0.020806			1.37			1.1503			3.6087
AEAETLPSLSITK	1358.73	IPI00220873	Bifunctional 3'-phosphoadenosine 5'-phosphosulfate synthetase 2;Sulfurylase kinase 2;Sulfate adenylyltransferase;Sulfate adenylate transferase;ATP-sulfurylase;Adenylyl-sulfate kinase;Adenylylsulfate 3'-phosphotransferase;APS kinase;Adenosine-5'-phosphosulfate 3'-phosphotransferase;3'-phosphoadenosine-5'-phosphosulfate synthetase;cDNA FLJ53931, highly similar to Bifunctional 3'-phosphoadenosine5'-…	1.4349e-12		3.6664	11.701		0.44344	1.8672	2.9814		11.462
AEAGAGLSETVTETTVTVTTEPENR	2562.23	IPI00030355	Protein phosphatase 1 regulatory subunit 11;Protein phosphatase inhibitor 3;Hemochromatosis candidate protein V;HCG V;HCG-V;Protein phosphatase 1, regulatory (Inhibitor) subunit 11;Protein phosphatase 1, regulatory (Inhibitor) subunit 11, isoform CRA_a;cDNA, FLJ93673, Homo sapiens protein phosphatase 1, regulatory (inhibitor) subunit11 (PPP1R11), transcript variant 1, mRNA	7.9297e-31		0.81109
AEAGAGSATEFQFR	1440.66	IPI00008438	40S ribosomal protein S10;Ribosomal protein S10, isoform CRA_c;cDNA, FLJ92058, Homo sapiens ribosomal protein S10 (RPS10), mRNA;Ribosomal protein S10 variant;Putative 40S ribosomal protein S10-like protein;Putative uncharacterized protein ENSP00000383249	1.247e-25	1.278		1.4752	1.1451	0.83217		0.77217		0.97834
AEAGDNLGALVR	1184.61	IPI00027107	Elongation factor Tu, mitochondrial;P43	1.9337e-34	1.2595	1.5964	1.0286	0.53962	0.9017	0.51518	2.1289		2.3369
AEAGEAGQATAEAECHR	1756.74	IPI00479385	N-acetylserotonin O-methyltransferase-like protein;cDNA FLJ10228 fis, clone HEMBB1000119, highly similar to N-acetylserotonin O-methyltransferase-like protein;cDNA FLJ55355, highly similar to N-acetylserotonin O-methyltransferase-like protein;cDNA FLJ58813, highly similar to N-acetylserotonin O-methyltransferase-like protein;cDNA FLJ59356, highly similar to N-acetylserotonin O-methyltransferase-l…	3.0897e-42	2.3352	4.1182	4.3013		9.0908	6.3989			4.9769
AEAGEAGQATAEAECHRTR	2013.89	IPI00479385	N-acetylserotonin O-methyltransferase-like protein;cDNA FLJ10228 fis, clone HEMBB1000119, highly similar to N-acetylserotonin O-methyltransferase-like protein;cDNA FLJ55355, highly similar to N-acetylserotonin O-methyltransferase-like protein;cDNA FLJ58813, highly similar to N-acetylserotonin O-methyltransferase-like protein;cDNA FLJ59356, highly similar to N-acetylserotonin O-methyltransferase-l…	4.4358e-06								10.172
AEAGEQPGTAER	1214.55	IPI00550766	Ribosomal RNA processing protein 1 homolog A;RRP1-like protein;Novel nuclear protein 1;Nucleolar protein Nop52;Putative uncharacterized protein RRP1;Nucleolar protein NOP52 variant;RRP1 protein;NNP3	0.29287			1.2428					0.33037
AEAGGGWEGSASYK	1368.59	IPI00032050	WW domain-binding protein 2;WW-domain binding protein 2;cDNA FLJ59459, highly similar to WW domain-binding protein 2;cDNA FLJ57063, highly similar to WW domain-binding protein 2;Putative uncharacterized protein DKFZp564D012;cDNA FLJ59865, highly similar to WW domain-binding protein 2	7.9709e-16	0.85011				2.9179
AEAGPEGVAPAPEGEK	1507.72	IPI00000877	Hypoxia up-regulated protein 1;150 kDa oxygen-regulated protein;Orp150;Oxigen-regulated protein 150;cDNA, FLJ94899, Homo sapiens hypoxia up-regulated 1 (HYOU1), mRNA;cDNA FLJ45395 fis, clone BRHIP3027191, highly similar to 150 kDa oxygen-regulated protein (Orp150);cDNA FLJ59408, highly similar to 150 kDa oxygen-regulated protein (Orp150);cDNA FLJ54564, highly similar to 150 kDa oxygen-regulated p…	2.2979e-37	1.6105	1.934	0.88125	0.57171	1.7508	0.84783	1.8032	2.0654	1.1188
AEAGPEGVAPAPEGEKK	1635.81	IPI00000877	Hypoxia up-regulated protein 1;150 kDa oxygen-regulated protein;Orp150;Oxigen-regulated protein 150;cDNA, FLJ94899, Homo sapiens hypoxia up-regulated 1 (HYOU1), mRNA;cDNA FLJ45395 fis, clone BRHIP3027191, highly similar to 150 kDa oxygen-regulated protein (Orp150);cDNA FLJ59408, highly similar to 150 kDa oxygen-regulated protein (Orp150);cDNA FLJ54564, highly similar to 150 kDa oxygen-regulated p…	1.6781e-12		3.2606	1.4378	0.56937	1.6043				1.3957
AEAGPQAPPPPGTPSR	1528.76	IPI00292880	Transcription factor E2F4	0.97011		0.5972
AEAGRPYEYYK	1345.63	IPI00024307	Ephrin-B1;EPH-related receptor tyrosine kinase ligand 2;EFL-3	0.13171							0.4131	0.039198	0.066129
AEAGSGGPGFTFTFR	1500.7	IPI00220102	DnaJ homolog subfamily B member 2;Heat shock 40 kDa protein 3;DnaJ protein homolog 1;HSJ-1;cDNA FLJ78532, highly similar to Homo sapiens DnaJ (Hsp40) homolog, subfamily B, member 2 (DNAJB2), mRNA;cDNA FLJ57513, highly similar to Homo sapiens DnaJ (Hsp40) homolog, subfamily B, member 2 (DNAJB2), mRNA;DnaJ (Hsp40) homolog, subfamily B, member 2, isoform CRA_a;Putative uncharacterized protein DNAJB2…	0.0004557							0.11018		0.16589
AEAGVPAEFSIWTR	1532.76	IPI00333541	Filamin-A;Alpha-filamin;Filamin-1;Endothelial actin-binding protein;Actin-binding protein 280;Non-muscle filamin;Filamin A, alpha (Actin binding protein 280);Filamin A, alpha (Actin binding protein 280), isoform CRA_b;Filamin A;Filamin A, alpha (Actin binding protein 280), isoform CRA_c;FLNA protein;FLJ00119 protein;cDNA FLJ57890, highly similar to Filamin-A	3.6842e-34	0.38857	0.47752	0.29143		0.99457	0.91894		0.22412	0.24077
AEAHKEAMSR	1128.53	IPI00790097		0.15307					20.433
AEALASAIASTK	1131.61	IPI00018260	Armadillo repeat-containing protein 1;cDNA FLJ57447, highly similar to Armadillo repeat-containing protein 1	1.5141e-09					0.44399				0.99654
AEALIQLLDVNDNDPVVK	1965.04	IPI00852735	Protocadherin Fat 4;FAT tumor suppressor homolog 4;Fat-like cadherin protein FAT-J;cDNA FLJ39327 fis, clone OCBBF2015506, highly similar to Mus musculus FAT tumor suppressor homolog 4 (Drosophila) (Fat4), mRNA;Putative uncharacterized protein FAT4	0.23206							13.999	3.8865
AEALLSHAPR	1063.58	IPI00922194	cDNA FLJ56198, highly similar to Serine/threonine-protein kinase PCTAIRE-1 (EC 2.7.11.22);cDNA FLJ55502, highly similar to Serine/threonine-protein kinase PCTAIRE-1 (EC 2.7.11.22);Serine/threonine-protein kinase PCTAIRE-1;PCTAIRE-motif protein kinase 1;cDNA FLJ75610, highly similar to Homo sapiens PCTAIRE protein kinase 1 (PCTK1), transcript variant 1, mRNA;PCTAIRE protein kinase 1, isoform CRA_c…	0.00029384						1.4467			0.57962
AEALTEPLNA	1027.52	IPI00015801	CKLF-like MARVEL transmembrane domain-containing protein 6;Chemokine-like factor superfamily member 6;CKLF-like MARVEL transmembrane domain containing 6, isoform CRA_a;CKLFSF6 protein	0.0020405
AEAPHAPAAPSALAR	1428.75	IPI00375629	Iroquois-class homeodomain protein IRX-1;Iroquois homeobox protein 1;Homeodomain protein IRXA1	7.6723e-07
AEAQGSTTLLVSYR	1494.77	IPI00291755	Nuclear pore membrane glycoprotein 210	1.8407e-21				1.8544
AEAQQVEALPGPSLDQWHR	2131.04	IPI00883925	FLJ00169 protein;ADP-ribosylation factor-like protein 6-interacting protein 4;SR-15;SRp25;SR-25;HSP-975;HSVI-binding protein;cDNA, FLJ96871, highly similar to Homo sapiens ADP-ribosylation-like factor 6 interacting protein 4(ARL6IP4), mRNA;Splicing regulator SRrp37;Splicing regulator SRrp37-2	9.1453e-07	1.8511				1.4769		1.5318
AEASGGLGGLTR	1087.56	IPI00604527	Threonyl-tRNA synthetase, mitochondrial;Threonine--tRNA ligase;Threonyl-tRNA synthetase-like 1;Threonyl-tRNA synthetase 2, mitochondrial (Putative);cDNA FLJ12528 fis, clone NT2RM4000155, moderately similar to THREONYL-TRNA SYNTHETASE, CYTOPLASMIC (EC 6.1.1.3);Threonyl-tRNA synthetase-like 1, isoform CRA_b;Threonyl-tRNA synthetase;Putative uncharacterized protein DKFZp667F1511	8.1906e-14			1.3962			0.47631
AEASIQAGAGDGEWEESEVK	2061.91	IPI00021812	Neuroblast differentiation-associated protein AHNAK;Desmoyokin;cDNA FLJ57801, highly similar to Homo sapiens AHNAK nucleoprotein (desmoyokin) (AHNAK), transcript variant 1, mRNA;AHNAK-related protein;cDNA FLJ46846 fis, clone UTERU3004635, moderately similar to Neuroblast differentiation associated protein AHNAK;cDNA FLJ33834 fis, clone CTONG2004264, moderately similar to NEUROBLAST DIFFERENTIATIO…	6.2793e-114	0.44429	0.70668			0.80787		0.25652	0.23012
AEASPHPGR	920.446	IPI00745921	RING finger protein 126;cDNA FLJ77001, highly similar to Homo sapiens ring finger protein 126 (RNF126), transcript variant 2, mRNA;R33683_3;Putative uncharacterized protein	1							0.61891		0.45711
AEASSGDHPTDTEMK	1574.65	IPI00219005	FK506-binding protein 4;Peptidyl-prolyl cis-trans isomerase;HSP-binding immunophilin;FKBP52 protein;52 kDa FK506-binding protein;FKBP59;p59 protein;cDNA, FLJ94557, highly similar to Homo sapiens FK506 binding protein 4, 59kDa (FKBP4), mRNA	3.0774e-24		3.6948	2.4074	1.1464	1.127		4.5288		2.7224
AEASSGDHPTDTEMKEEQK	2088.89	IPI00219005	FK506-binding protein 4;Peptidyl-prolyl cis-trans isomerase;HSP-binding immunophilin;FKBP52 protein;52 kDa FK506-binding protein;FKBP59;p59 protein;cDNA, FLJ94557, highly similar to Homo sapiens FK506 binding protein 4, 59kDa (FKBP4), mRNA	1.0136e-28		0.35329	2.6799	1.8371	2.3451	1.0416	5.8261		2.767
AEASWDSAVHGCPQLSR	1869.84	IPI00939605	Kinesin-like protein KIF13B;Kinesin-like protein GAKIN;KIF13B protein;Putative uncharacterized protein KIF13B	0.91637					0.45144
AEAVESAQAGDK	1174.55	IPI00031517	DNA replication licensing factor MCM6;p105MCM;MCM6 minichromosome maintenance deficient 6 (MIS5 homolog, S. pombe) (S. cerevisiae);cDNA, FLJ92950, Homo sapiens MCM6 minichromosome maintenance deficient 6 (MIS5 homolog, S. pombe) (S. cerevisiae) (MCM6), mRNA;cDNA FLJ51591, highly similar to DNA replication licensing factor MCM6;Putative uncharacterized protein MCM6	1.9337e-34		1.3297	1.2444						4.8246
AEAVFHAPK	968.508	IPI00427037	tRNA-splicing endonuclease subunit Sen2;tRNA-intron endonuclease Sen2;cDNA FLJ76821, highly similar to Homo sapiens tRNA splicing endonuclease 2 homolog (SEN2, S. cerevisiae) (TSEN2), mRNA;cDNA FLJ55685, highly similar to tRNA-splicing endonuclease subunit Sen2 (EC 3.1.27.9);cDNA FLJ58327, highly similar to tRNA-splicing endonuclease subunit Sen2 (EC 3.1.27.9)	0.00011104	1.1933	2.8558
AEAVLIDLFGLK	1287.74	IPI00292688	UPF0124 protein C13orf31;Novel protein;Putative uncharacterized protein FLJ38725;Putative uncharacterized protein DKFZp686D11119	5.3652e-13							0.065672	0.24949
AECLEKFPVIQHFK	1744.9	IPI00893197	Serine/threonine-protein phosphatase 2A regulatory subunit B';PP2A, subunit B', PR53 isoform;Phosphotyrosyl phosphatase activator;Protein phosphatase 2A activator, regulatory subunit 4;Protein phosphatase 2A, regulatory subunit B' (PR 53), isoform CRA_a;Protein phosphatase 2A, regulatory subunit B' (PR 53), isoform CRA_g;Putative uncharacterized protein DKFZp781M17165	1.8407e-21			1.9962			1.5252			2.3599
AECRPAASENYMR	1553.67	IPI00477686	General transcription factor IIF subunit 2;Transcription initiation factor IIF subunit beta;ATP-dependent helicase GTF2F2;Transcription initiation factor RAP30	2.509e-19	0.69927	0.72626	0.73257				0.69517	0.94783	0.83827
AECSAEQCYK	1244.48	IPI00008215	NADP-dependent malic enzyme;Malic enzyme 1;Malic enzyme	0.018797			1.5854						1.3238
AEDAPGVPLR	1023.53	IPI00103397	Mucin-5AC;Mucin-5 subtype AC, tracheobronchial;Tracheobronchial mucin;Major airway glycoprotein;Gastric mucin;Lewis B blood group antigen;Mucin	7.6147e-07				0.14088		0.010284
AEDAPLSSGEDPNSR	1543.67	IPI00028392	Specifically androgen-regulated gene protein	2.3922e-48	0.098348		0.068163
AEDAVEAIR	972.488	IPI00027838	RNA-binding protein 4B;RNA-binding motif protein 4B;RNA-binding protein 30;RNA-binding motif protein 30;cDNA FLJ37839 fis, clone BRSSN2011653, highly similar to RNA-binding protein 4B;RNA binding motif protein 4B	2.0281e-05			1.5413			1.1986			0.8137
AEDDQPLPGVLLSLSGGLFR	2083.09	IPI00465432	Nodal modulator 2;pM5 protein 2;NOMO2 protein;Nodal modulator 1;pM5;Putative uncharacterized protein DKFZp547A1913;Nodal modulator 3;pM5 protein 3;NOMO3 protein	9.0683e-58	2.4059					1.2254	0.66075		1.3207
AEDEVQRER	1130.53	IPI00304925	Heat shock 70 kDa protein 1;HSP70.1;HSP70-1/HSP70-2;Heat shock 70kDa protein 1A;Heat shock 70kDa protein 1B;cDNA FLJ75127, highly similar to Homo sapiens heat shock 70kDa protein 1A, mRNA;cDNA FLJ54328, highly similar to Heat shock 70 kDa protein 1;cDNA FLJ54283, highly similar to Heat shock 70 kDa protein 1;Heat shock protein 72;cDNA FLJ53752, highly similar to Heat shock 70 kDa protein 1;cDNA F…	1			0.67494
AEDFQIEGYNPHPTIK	1857.89	IPI00221108	Thymidylate synthase;Thymidylate synthetase, isoform CRA_a	1.2315e-18	0.30317
AEDFTPVFMAPPVHYPR	1972.95	IPI00016576	Grainyhead-like protein 2 homolog;Brother of mammalian grainyhead;Transcription factor CP2-like 3;Grainyhead-like 2 (Drosophila);Grainyhead-like 2 (Drosophila), isoform CRA_b;cDNA FLJ77442, highly similar to Homo sapiens grainyhead-like 2 (Drosophila), mRNA;cDNA FLJ53801, highly similar to Grainyhead-like protein 2	0.0032877				0.74535	0.67098
AEDGATPSPSNETPK	1499.67	IPI00219301	Myristoylated alanine-rich C-kinase substrate;Protein kinase C substrate, 80 kDa protein, light chain;MARCKS protein	5.4993e-05									0.013227
AEDGENYDIK	1152.49	IPI00217236	Tubulin-specific chaperone A;Tubulin-folding cofactor A;TCP1-chaperonin cofactor A;TBCA protein;Tubulin folding cofactor A;Tubulin-specific chaperone a;cDNA, FLJ92496, Homo sapiens tubulin-specific chaperone a (TBCA), mRNA;cDNA FLJ57496, moderately similar to Tubulin-specific chaperone A	0.0041865	1.5212		1.5511		1.1322			2.1917	0.99155
AEDGENYDIKK	1280.59	IPI00217236	Tubulin-specific chaperone A;Tubulin-folding cofactor A;TCP1-chaperonin cofactor A;TBCA protein;Tubulin folding cofactor A;Tubulin-specific chaperone a;cDNA, FLJ92496, Homo sapiens tubulin-specific chaperone a (TBCA), mRNA;cDNA FLJ57496, moderately similar to Tubulin-specific chaperone A	0.67792			2.0068			1.2609			1.2649
AEDGSVIDYELIDQDAR	1907.87	IPI00418169	Putative uncharacterized protein DKFZp686P03159;Annexin A2;Annexin-2;Annexin II;Lipocortin II;Calpactin I heavy chain;Chromobindin-8;p36;Protein I;Placental anticoagulant protein IV;cDNA FLJ34687 fis, clone MESAN2000620, highly similar to Annexin A2	4.2264e-101	0.10364	0.12715	0.097873	0.50236	0.58236	0.89628	0.031782	0.04338
AEDGSVIDYELIDQDARDLYDAGVK	2769.3	IPI00418169	Putative uncharacterized protein DKFZp686P03159;Annexin A2;Annexin-2;Annexin II;Lipocortin II;Calpactin I heavy chain;Chromobindin-8;p36;Protein I;Placental anticoagulant protein IV;cDNA FLJ34687 fis, clone MESAN2000620, highly similar to Annexin A2	1.2144e-36		0.096919					0.037596	0.028073
AEDIEQMR	990.444	IPI00307257	TBC1 domain family member 9B;cDNA FLJ10611 fis, clone NT2RP2005315, highly similar to Homo sapiens KIAA0676 protein;TBC1 domain family, member 9B;TBC1 domain family, member 9B (With GRAM domain);cDNA FLJ10334 fis, clone NT2RM2000649, highly similar to Homo sapiens KIAA0676 protein;cDNA FLJ90310 fis, clone NT2RP2001200, highly similar to Homo sapiens KIAA0676 protein;TBC1D9B protein	0.020806			1.086			0.89818			1.2362
AEDIPQMDDAFSQTVK	1793.81	IPI00021048	Myoferlin;Fer-1-like protein 3	3.7834e-06	0.20617
AEDKEWMPVTK	1332.64	IPI00013485	40S ribosomal protein S2;S4;LLRep3 protein;Similar to 40S ribosomal protein S2;Ribosomal protein S2, isoform CRA_a;cDNA, FLJ92460, Homo sapiens ribosomal protein S2 (RPS2), mRNA;Ribosomal protein S2;RPS2 protein;Putative uncharacterized protein ENSP00000351543;Ribosomal protein S2, isoform CRA_b	8.5931e-21			1.3271			1.3932			1.0059
AEDLCR	762.333	IPI00215888	Signal recognition particle 72 kDa protein;SRP72 protein;CaM kinase II isoform;Putative signal recognition particle;Putative uncharacterized protein DKFZp686A04192;Similar to signal recognition particle 72kDa;Leucine zipper protein 1;LUZP1 protein	1									0.6526
AEDLLNR	829.429	IPI00294065	Golgin subfamily A member 5;Golgin-84;RET-fused gene 5 protein;Ret-II protein;cDNA FLJ76981, highly similar to Homo sapiens golgi autoantigen, golgin subfamily a, 5 (GOLGA5), mRNA;Cell proliferation-inducing gene 31;Golgi autoantigen, golgin subfamily a, 5;cDNA FLJ54399, highly similar to Golgin subfamily A member 5	0.26392				0.9592					1.0975
AEDLLNRVDQGAATALSRK	2027.08	IPI00294065	Golgin subfamily A member 5;Golgin-84;RET-fused gene 5 protein;Ret-II protein;cDNA FLJ76981, highly similar to Homo sapiens golgi autoantigen, golgin subfamily a, 5 (GOLGA5), mRNA;Cell proliferation-inducing gene 31;Golgi autoantigen, golgin subfamily a, 5;cDNA FLJ54399, highly similar to Golgin subfamily A member 5	9.4284e-07				0.70302			1.4789	2.2317
AEDLNIAPR	997.519	IPI00045939	2-aminoethanethiol dioxygenase;Cysteamine dioxygenase;Chromosome 10 open reading frame 22;Chromosome 10 open reading frame 22, isoform CRA_a;cDNA FLJ45793 fis, clone NT2RI2009233	0.023472				0.7544		0.41858
AEDLPLRK	940.534	IPI00746655	Extended synaptotagmin-1;Membrane-bound C2 domain-containing protein;Protein FAM62A;cDNA FLJ12728 fis, clone NT2RP2000040, highly similar to Protein FAM62A;cDNA FLJ46898 fis, clone UTERU3022168, highly similar to Protein FAM62A	1									0.36028
AEDMAELTCLNEASVLHNLR	2285.08	IPI00926581	MYH14 variant protein;Myosin-14;Myosin heavy chain 14;Myosin heavy chain, non-muscle IIc;Non-muscle myosin heavy chain IIc;Nonmuscle myosin heavy chain II-C variant;MYH14 protein;cDNA FLJ43092 fis, clone COLON2002520, highly similar to Myosin-14;cDNA FLJ56368, highly similar to Myosin-14;Myosin;cDNA FLJ16179 fis, clone BRHIP3000070, highly similar to Myosin-14	1.71e-10		1.1199	0.44969				8.5656
AEDMYSAQSHQAATPPK	1830.82	IPI00396108	G-protein coupled receptor family C group 5 member C;Retinoic acid-induced gene 3 protein;Putative uncharacterized protein GPRC5C;cDNA FLJ20242 fis, clone COLF6369	0.017946				0.13695	0.088279
AEDMYSAQSHQAATPPKDGK	2130.96	IPI00396108	G-protein coupled receptor family C group 5 member C;Retinoic acid-induced gene 3 protein;Putative uncharacterized protein GPRC5C;cDNA FLJ20242 fis, clone COLF6369	0.2055						0.033468
AEDNADTLALVFEAPNQEK	2073.99	IPI00021700	Proliferating cell nuclear antigen;Cyclin	4.9214e-50	0.68734	0.6829	0.71904		0.92387	1.271	1.212	1.4038
AEDNFEDIITKPPVRK	1870.98	IPI00007675	Cytoplasmic dynein 1 light intermediate chain 1;Dynein light intermediate chain 1, cytosolic;Dynein, cytoplasmic 1, light intermediate chain 1;Dynein, cytoplasmic 1, light intermediate chain 1, isoform CRA_c;cDNA FLJ10219 fis, clone HEMBA1007018, highly similar to Cytoplasmic dynein 1 light intermediate chain 1;Putative uncharacterized protein DKFZp686A1525;cDNA FLJ58500, highly similar to Cytopl…	0.0013022	0.48822	0.77705	0.3801	0.98747	1.5799	0.77473		0.8774	0.43324
AEDSGEYHCVYHFVSAPK	2094.91	IPI00018311	Neuroplastin;Stromal cell-derived receptor 1;cDNA FLJ60678, highly similar to Homo sapiens stromal cell derived factor receptor 1 (SDFR1), transcript variant beta, mRNA;Putative uncharacterized protein DKFZp566H1924;Homo sapiens clone 23742;Neuroplastin, isoform CRA_b;cDNA, FLJ94993, Homo sapiens stromal cell derived factor receptor 1 (SDFR1),transcript variant alpha, mRNA;NPTN protein	1.9232e-32		0.3891	0.3562		0.62634		0.29936	0.20733	0.39108
AEDTISILPDDPR	1440.71	IPI00797096	Protein Churchill	0.00049402			0.24871
AEDYEENLQVMR	1495.66	IPI00873577	Putative uncharacterized protein KIF23;Kinesin-like protein KIF23;Mitotic kinesin-like protein 1;Kinesin-like protein 5;cDNA FLJ58416, highly similar to Kinesin-like protein KIF23	1.5141e-09			0.95435						3.0048
AEEAGIGDTPSLEDEAAGHVTQAR	2423.12	IPI00025499	Microtubule-associated protein tau;Neurofibrillary tangle protein;Paired helical filament-tau;Microtubule-associated protein	2.5552e-24					0.055072
AEEAQKTESVDNEGE	1634.69	IPI00018842	High mobility group nucleosome-binding domain-containing protein 3;Thyroid receptor-interacting protein 7;Putative uncharacterized protein DKFZp686E20226	2.1501e-16			0.5534
AEEASHWLWSR	1370.64	IPI00853369	Plexin-B2;MM1	0.044919			0.41632			0.18661	0.49907		0.49227
AEEDAALQAK	1044.51	IPI00815713	Treacle protein;Treacher Collins syndrome protein;TCOF1 protein variant;Putative uncharacterized protein DKFZp434G1035;cDNA FLJ57828, highly similar to Treacle protein;TCOF1 protein;cDNA FLJ57346, highly similar to Homo sapiens Treacher Collins-Franceschetti syndrome 1 (TCOF1), transcript variant 1, mRNA;cDNA FLJ58017, moderately similar to Treacle protein	0.012569			1.5195			1.3344
AEEDEILNR	1087.51	IPI00020984	cDNA FLJ55574, highly similar to Calnexin;Calnexin;Major histocompatibility complex class I antigen-binding protein p88;p90;IP90;Calnexin, isoform CRA_a;cDNA, FLJ92651, Homo sapiens calnexin (CANX), mRNA;cDNA FLJ54242, highly similar to Calnexin	2.0281e-05	0.27516				0.557		0.22529	1.4296
AEEDEILNRSPR	1427.7	IPI00020984	cDNA FLJ55574, highly similar to Calnexin;Calnexin;Major histocompatibility complex class I antigen-binding protein p88;p90;IP90;Calnexin, isoform CRA_a;cDNA, FLJ92651, Homo sapiens calnexin (CANX), mRNA;cDNA FLJ54242, highly similar to Calnexin	0.0092317			0.63875		0.65806		1.5483		1.2363
AEEDKLEQIKK	1329.71	IPI00009923	Prolyl 4-hydroxylase subunit alpha-1;4-PH alpha-1;Procollagen-proline,2-oxoglutarate-4-dioxygenase subunit alpha-1;Procollagen-proline, 2-oxoglutarate 4-dioxygenase (Proline 4-hydroxylase), alpha polypeptide I;Procollagen-proline, 2-oxoglutarate 4-dioxygenase (Proline 4-hydroxylase), alpha polypeptide I variant;Procollagen-proline, 2-oxoglutarate 4-dioxygenase (Proline 4-hydroxylase), alpha polyp…	0.0048723			2.7671			0.51766
AEEDVEPECIMEK	1577.66	IPI00101968	Drebrin-like protein;Drebrin-F;SH3 domain-containing protein 7;Cervical SH3P7;HPK1-interacting protein of 55 kDa;Cervical mucin-associated protein;cDNA FLJ53677, highly similar to Drebrin-like protein;cDNA FLJ59450, highly similar to Drebrin-like protein;cDNA FLJ54071, highly similar to Drebrin-like protein;cDNA FLJ59941, highly similar to Drebrin-like protein;cDNA FLJ59481, highly similar to Dre…	2.509e-19	0.84072	0.89215	0.72123		1.346	0.9842		0.474
AEEEFNIEK	1107.51	IPI00003856	V-type proton ATPase subunit E 1;Vacuolar proton pump subunit E 1;V-ATPase 31 kDa subunit;ATPase, H+ transporting, lysosomal 31kDa, V1 subunit E isoform 1;ATPase, H+ transporting, lysosomal 31kDa, V1 subunit E1, isoform CRA_b;cDNA, FLJ92725, Homo sapiens ATPase, H+ transporting, lysosomal 31kDa, V1 subunit Eisoform 1 (ATP6V1E1), mRNA;cDNA FLJ51833, highly similar to Homo sapiens ATPase, H+ transp…	0.0049144			0.64264			0.47772		1.3354	0.40253
AEEENEFQIPGR	1417.65	IPI00430622	Spartin;Trans-activated by hepatitis C virus core protein 1;cDNA FLJ75882, highly similar to Homo sapiens spastic paraplegia 20, spartin (Troyer syndrome) (SPG20), mRNA;cDNA FLJ11087 fis, clone PLACE1005277, highly similar to Spartin;Spastic paraplegia 20, spartin (Troyer syndrome), isoform CRA_b;cDNA FLJ11345 fis, clone PLACE1010877, highly similar to Spartin;cDNA FLJ53483, highly similar to Spa…	1.7311e-05									0.15115
AEEFDQIK	978.466	IPI00430472	Activating signal cointegrator 1 complex subunit 3;ASC-1 complex subunit p200;Trip4 complex subunit p200;Helicase, ATP binding 1;cDNA FLJ56882, highly similar to Activating signal cointegrator 1 complex subunit 3 (EC 3.6.1.-);ASCC3 protein	3.2355e-08									0.75438
AEEFLTASQEAL	1307.62	IPI00000030	Serine/threonine-protein phosphatase 2A 56 kDa regulatory subunit delta isoform;PP2A, B subunit, B' delta isoform;PP2A, B subunit, B56 delta isoform;PP2A, B subunit, PR61 delta isoform;PP2A, B subunit, R5 delta isoform;cDNA FLJ76895, highly similar to Homo sapiens protein phosphatase 2, regulatory subunit B (B56), delta isoform (PPP2R5D), transcript variant 1, mRNA;cDNA FLJ55863, highly similar t…	0.0090041
AEEGIAAGGVMDVNTALQEVLK	2214.12	IPI00013917	40S ribosomal protein S12	7.7001e-244	1.3843	1.247	1.308			1.3475	0.92874	1.123
AEEILEK	830.439	IPI00376798	60S ribosomal protein L11;CLL-associated antigen KW-12;Cell growth-inhibiting protein 34;Ribosomal protein L11;Ribosomal protein L11, isoform CRA_b;cDNA, FLJ92077, Homo sapiens ribosomal protein L11 (RPL11), mRNA	0.00043521		1.4555	1.2264	1.4839	1.6286	1.4122			1.1602
AEEILEKGLK	1128.64	IPI00376798	60S ribosomal protein L11;CLL-associated antigen KW-12;Cell growth-inhibiting protein 34;Ribosomal protein L11;Ribosomal protein L11, isoform CRA_b;cDNA, FLJ92077, Homo sapiens ribosomal protein L11 (RPL11), mRNA	7.6147e-07
AEEIYPIKER	1246.66	IPI00027725	Caspase-4;ICH-2 protease;TX protease;ICE(rel)-II;Caspase-4 subunit 1;Caspase-4 subunit 2;Caspase 4, apoptosis-related cysteine peptidase;Caspase 4, apoptosis-related cysteine peptidase, isoform CRA_b;Mih1/TX isoform alpha;cDNA FLJ32532 fis, clone SMINT2000229, highly similar to CASPASE-4 (EC 3.4.22.-);cDNA FLJ58874, highly similar to Caspase-4 (EC 3.4.22.-);Mih1/TX isoform beta;Caspase 4, apoptos…	0.051346			0.2972						0.067075
AEEKENHCPTMLRPLSHR	2204.06	IPI00000769	Kinesin-like protein KIF22;Kinesin-like DNA-binding protein;Kinesin-like protein 4;cDNA FLJ53835, highly similar to Kinesin-like protein KIF22;cDNA, FLJ79288, highly similar to Kinesin-like protein KIF22;Kinesin family member 22, isoform CRA_b;cDNA, FLJ78949, highly similar to Kinesin-like protein KIF22;OriP binding protein like gene product;OriP binding protein	0.10829			0.79588						11.421
AEELFLWVPRK	1386.77	IPI00165026	SET domain-containing protein 3;SET domain containing 3;SET domain containing 3, isoform CRA_a;cDNA FLJ54421, highly similar to Mus musculus SET domain containing 3 (Setd3), mRNA;SET domain containing 3, isoform CRA_b;SETD3 protein;Putative uncharacterized protein SETD3	5.4093e-10	1.5116	2.2103		0.9822	1.4212		1.3263	1.6837
AEELGLPILGVLR	1378.82	IPI00012828	3-ketoacyl-CoA thiolase, peroxisomal;Beta-ketothiolase;Acetyl-CoA acyltransferase;Peroxisomal 3-oxoacyl-CoA thiolase;cDNA FLJ55549, highly similar to 3-ketoacyl-CoA thiolase, peroxisomal (EC 2.3.1.16);3-oxoacyl-CoA thiolase;cDNA FLJ61196, highly similar to 3-ketoacyl-CoA thiolase, peroxisomal (EC 2.3.1.16)	6.9831e-28	0.74963	0.84093	0.54976		0.58185		1.0223	0.89899	0.70523
AEELGQELK	1015.52	IPI00006196	Nuclear mitotic apparatus protein 1;SP-H antigen;cDNA FLJ76708, highly similar to Homo sapiens nuclear mitotic apparatus protein 1 (NUMA1), mRNA;NUMA1 protein;Nuclear mitotic apparatus protein 1 variant;Putative uncharacterized protein;Nuclear mitotic apparatus protein;NUMA1 variant protein	0.023472									0.64665
AEELHYPLGER	1312.64	IPI00790214	Putative uncharacterized protein RCN2;Reticulocalbin-2;Calcium-binding protein ERC-55;E6-binding protein;Reticulocalbin 2, EF-hand calcium binding domain;cDNA, FLJ94458, Homo sapiens reticulocalbin 2, EF-hand calcium binding domain(RCN2), mRNA	0.0047813	0.95548	1.0628			0.70271		1.2614	1.1422
AEELLAEEK	1030.52	IPI00146935	Dynamin-1-like protein;Dynamin-like protein;Dnm1p/Vps1p-like protein;Dynamin family member proline-rich carboxyl-terminal domain less;Dynamin-related protein 1;Dynamin-like protein 4;Dynamin-like protein IV;HdynIV;cDNA FLJ56381, highly similar to Dynamin-1-like protein (EC 3.6.5.5);cDNA FLJ55044, highly similar to Dynamin-1-like protein (EC 3.6.5.5);Dynamin-like protein DYNIV-11 variant;cDNA FLJ5…	0.00013843			0.4299			0.63974		0.16735	0.18752
AEELVLER	957.513	IPI00294578	Protein-glutamine gamma-glutamyltransferase 2;Tissue transglutaminase;TGase C;Transglutaminase-2;TGase-H;cDNA FLJ58187, highly similar to Protein-glutamine gamma-glutamyltransferase 2(EC 2.3.2.13);cDNA FLJ57198, highly similar to Protein-glutamine gamma-glutamyltransferase 2 (EC 2.3.2.13);TGM2 protein;Transglutaminase 2 (C polypeptide, protein-glutamine-gamma-glutamyltransferase);Putative unchara…	0.0040364								0.016521
AEENALQQK	1029.51	IPI00013933	Desmoplakin;250/210 kDa paraneoplastic pemphigus antigen	1									0.44539
AEEQMLK	847.411	IPI00029012	Eukaryotic translation initiation factor 3 subunit A;Eukaryotic translation initiation factor 3 subunit 10;eIF-3-theta;eIF3 p167;eIF3 p180;eIF3 p185;Eukaryotic translation initiation factor 3, subunit 10 theta, 150/170kDa;cDNA FLJ50921, highly similar to Eukaryotic translation initiation factor 3 subunit 10;EIF3A protein;Eukaryotic translation initiation factor 3, subunit A	1									0.97985
AEEQPQVELFVK	1415.73	IPI00010896	Chloride intracellular channel protein 1;Nuclear chloride ion channel 27;Chloride channel ABP;Regulatory nuclear chloride ion channel protein;Chloride intracellular channel 1 variant;Chloride intracellular channel 1;cDNA, FLJ94671, Homo sapiens chloride intracellular channel 1 (CLIC1), mRNA	2.2374e-27	0.46413	0.55704	0.30275		1.0889		0.69249	0.71366
AEERAEVSELK	1259.64	IPI00010779	Tropomyosin alpha-4 chain;Tropomyosin-4;TM30p1;cDNA FLJ54184, highly similar to Tropomyosin alpha-4 chain	5.5434e-05	0.74519	0.93439	0.97769	2.0429	0.35907	0.68586	0.55271
AEEVATFFAK	1111.56	IPI00413611	DNA topoisomerase 1;DNA topoisomerase I;cDNA FLJ77890, highly similar to Homo sapiens type I DNA topoisomerase gene;Topoisomerase (DNA) I, isoform CRA_a;Topoisomerase (DNA) I;TOP1 protein;Putative uncharacterized protein	7.6147e-07	3.8291	3.9683	4.3707	0.94564	1.6561	1.5162	4.9396		5.3808
AEEVELYLEK	1221.61	IPI00783698	Transmembrane protein 87A;cDNA FLJ76697;cDNA FLJ78239;cDNA FLJ76707, highly similar to Homo sapiens transmembrane protein 87A, mRNA;cDNA FLJ58594	0.0020405						0.27984
AEEVVVR	800.439	IPI00220845	Integrin beta-4;GP150;Integrin beta	0.011524									0.063454
AEEVVVVAK	942.539	IPI00028065	Cytoplasmic protein NCK1;NCK adaptor protein 1;SH2/SH3 adaptor protein NCK-alpha;cDNA, FLJ93089, highly similar to Homo sapiens NCK adaptor protein 1 (NCK1), mRNA;cDNA FLJ50895, highly similar to Cytoplasmic protein NCK1	4.5937e-05	1.3792
AEEYEFLTPVEEAPK	1750.83	IPI00003815	Rho GDP-dissociation inhibitor 1;Rho-GDI alpha;cDNA, FLJ92666, highly similar to Homo sapiens Rho GDP dissociation inhibitor (GDI) alpha (ARHGDIA), mRNA;ARHGDIA protein;Rho GDP dissociation inhibitor (GDI) alpha;Rho GDP dissociation inhibitor (GDI) alpha, isoform CRA_a;Putative uncharacterized protein ENSP00000383556	2.8111e-35	0.74123	0.79593	0.4733		0.7379		0.70536	0.55303	0.45615
AEFAAPSTDAPDK	1318.6	IPI00552920	Exosome complex exonuclease RRP43;Ribosomal RNA-processing protein 43;Exosome component 8;p9;Opa-interacting protein 2	0.00049402	1.3693	1.443					2.0267	1.6719
AEFAER	721.34	IPI00010779	Tropomyosin alpha-4 chain;Tropomyosin-4;TM30p1;cDNA FLJ54184, highly similar to Tropomyosin alpha-4 chain;cDNA FLJ52936, weakly similar to Tropomyosin alpha-4 chain;Tropomyosin alpha-3 chain;Tropomyosin-3;Gamma-tropomyosin;Tropomyosin-5;Tropomyosin 3;cDNA FLJ35371 fis, clone SKMUS2001740, highly similar to TROPOMYOSIN ALPHA CHAIN, SKELETAL MUSCLE TYPE;TPM3 protein;cDNA FLJ32435 fis, clone SKMUS20…	0.31219			0.59806	0.713		0.6155			0.52556
AEFEQIVLGK	1132.61	IPI00004406	Uridine phosphorylase 1;UPP1 protein	7.6147e-07							0.010888		0.02244
AEFFADVVPAVR	1319.69	IPI00038378	Enolase-phosphatase E1;2,3-diketo-5-methylthio-1-phosphopentane phosphatase;MASA homolog;MasA	0.001007					0.84778				0.89138
AEFFADVVPAVRK	1447.78	IPI00038378	Enolase-phosphatase E1;2,3-diketo-5-methylthio-1-phosphopentane phosphatase;MASA homolog;MasA	4.8196e-06	1.1174	1.2929		1.0717	1.4728		1.5061	1.301
AEFGDFDIK	1040.48	IPI00552149	PHD finger protein 6;PHD finger protein 6, isoform CRA_d;PHD-like zinc finger protein;cDNA FLJ60207, highly similar to PHD finger protein 6;cDNA FLJ50940, highly similar to PHD finger protein 6;cDNA FLJ77450, highly similar to Homo sapiens PHD finger protein 6 (PHF6), transcript variant 3, mRNA;PHD finger protein 6, isoform CRA_a	0.10105	1.0044		1.1096		1.4732	1.6208		1.4465	1.8777
AEFGPPGPGAGSR	1198.57	IPI00642211	Aminopeptidase B;Arginine aminopeptidase;Arginyl aminopeptidase;Putative uncharacterized protein RNPEP	3.6459e-34	1.1894	1.5733	1.1545	0.56477	0.40338	0.38006	0.7314	0.52423	0.3647
AEFHQSVISR	1172.59	IPI00031547	Desmoglein-3;130 kDa pemphigus vulgaris antigen;Putative uncharacterized protein DKFZp686P23184	0.0015713			0.017993					0.012323	0.011112
AEFIVGGK	819.449	IPI00448798	Casein kinase I isoform alpha;CK1;cDNA FLJ55317, highly similar to Homo sapiens casein kinase 1, alpha 1 (CSNK1A1), transcript variant 1, mRNA;cDNA FLJ51815, highly similar to Homo sapiens casein kinase 1, alpha 1 (CSNK1A1), transcript variant 1, mRNA;CSNK1A1 protein;cDNA FLJ55318, highly similar to Casein kinase I isoform alpha (EC 2.7.11.1);Putative uncharacterized protein;cDNA FLJ56335, highly…	1	0.30247		1.1702			0.40783
AEFQGVLEK	1019.53	CON_00727340		2.4899e-07		0.053707
AEFTSPPSLFK	1222.62	IPI00395337	Pre-mRNA 3'-end-processing factor FIP1;Factor interacting with PAP;FIP1-like 1;Rearranged in hypereosinophilia;cDNA FLJ56493, highly similar to Pre-mRNA 3'-end-processing factor FIP1;cDNA FLJ61400, highly similar to Pre-mRNA 3'-end-processing factor FIP1	0.0048723	0.31161								1.0965
AEFTVETR	951.466	IPI00333541	Filamin-A;Alpha-filamin;Filamin-1;Endothelial actin-binding protein;Actin-binding protein 280;Non-muscle filamin;Filamin A, alpha (Actin binding protein 280);Filamin A, alpha (Actin binding protein 280), isoform CRA_b;Filamin A;Filamin A, alpha (Actin binding protein 280), isoform CRA_c;FLNA protein;FLJ00119 protein;cDNA FLJ57038, highly similar to Filamin-A;Similar to filamin C, gamma (Actin bin…	0.00035261			0.24179			1.0239			0.46066
AEFVEVTK	921.481	CON_00708398		3.2355e-08	0.014568	0.0025867	0.00064562			0.010419	0.033749	0.0015035
AEFVWHK	915.46	IPI00029403	Sorting nexin-4;cDNA FLJ10973 fis, clone PLACE1001092, highly similar to Sorting nexin-4;Sorting nexin 4, isoform CRA_a;cDNA FLJ50837, highly similar to Sorting nexin-4;PRO2637	0.26392			0.71976			0.72293	0.61755	0.58998	0.60032
AEFWLDLQPQAK	1444.74	IPI00329236	Protein kinase C delta type;nPKC-delta;cDNA FLJ57052, highly similar to Protein kinase C delta type (EC 2.7.11.13);Putative uncharacterized protein PRKCD	0.026099					1.7952
AEGAATEEEGTPK	1288.58	IPI00299024	Brain acid soluble protein 1;Neuronal axonal membrane protein NAP-22;22 kDa neuronal tissue-enriched acidic protein;cDNA FLJ51212, moderately similar to Brain acid soluble protein 1	0.00066987								6.2836
AEGAIAGFRDPFSGK	1521.76	IPI00010951	Epiplakin;450 kDa epidermal antigen;Putative uncharacterized protein DKFZp434G0719	0.0023194	0.42842
AEGDISNVANGFK	1320.63	IPI00001636	Ataxin-10;Spinocerebellar ataxia type 10 protein;Brain protein E46 homolog;Putative uncharacterized protein DKFZp434I1726;Putative uncharacterized protein ATXN10;cDNA FLJ54600, highly similar to Ataxin-10;HUMEEP;Ataxin 10	1.2376e-11		0.41959	0.36787		1.3872		0.82564	0.93497	0.99008
AEGDSWVLNGTK	1275.61	IPI00027701	Short-chain specific acyl-CoA dehydrogenase, mitochondrial;Butyryl-CoA dehydrogenase	0.0092317			0.68364
AEGDVAALNR	1014.51	IPI00010779	Tropomyosin alpha-4 chain;Tropomyosin-4;TM30p1;cDNA FLJ54184, highly similar to Tropomyosin alpha-4 chain;cDNA FLJ52936, weakly similar to Tropomyosin alpha-4 chain	1.0307e-05		0.48303		2.4049		3.2763	0.74642	0.84543	1.0123
AEGDVAALNRR	1170.61	IPI00010779	Tropomyosin alpha-4 chain;Tropomyosin-4;TM30p1;cDNA FLJ54184, highly similar to Tropomyosin alpha-4 chain;cDNA FLJ52936, weakly similar to Tropomyosin alpha-4 chain	0.0048723	1.0692	1.4988	1.592	2.0122		3.2542	0.90303	0.91512	0.64369
AEGFFGMYR	1076.47	IPI00027826	Mitochondrial glutamate carrier 2;Glutamate/H(+) symporter 2;Solute carrier family 25 member 18	2.4899e-07				0.057562		0.1996
AEGFVDALHR	1113.56	IPI00377261	Far upstream element-binding protein 3;Far upstream element (FUSE) binding protein 3;cDNA FLJ58115, highly similar to Far upstream element-binding protein 3;HCG31253, isoform CRA_a;Putative uncharacterized protein FUBP3	1.0307e-05			1.0423	1.1698		1.1268	0.78486	1.0981
AEGGAADLDTQR	1202.55	IPI00000728	Ubiquitin carboxyl-terminal hydrolase 15;Ubiquitin thioesterase 15;Ubiquitin-specific-processing protease 15;Deubiquitinating enzyme 15;Unph-2;Unph4;Ubiquitin carboxyl-terminal hydrolase;USP15 protein;cDNA FLJ58918, highly similar to Ubiquitin carboxyl-terminal hydrolase 15 (EC 3.1.2.15);cDNA FLJ13641 fis, clone PLACE1011229, highly similar to Homo sapiens ubiquitin-specific protease homolog (UPH…	9.622e-20	1.6915				1.2862
AEGGAADLDTQRSDIATLLK	2044.04	IPI00000728	Ubiquitin carboxyl-terminal hydrolase 15;Ubiquitin thioesterase 15;Ubiquitin-specific-processing protease 15;Deubiquitinating enzyme 15;Unph-2;Unph4;Ubiquitin carboxyl-terminal hydrolase;USP15 protein;cDNA FLJ58918, highly similar to Ubiquitin carboxyl-terminal hydrolase 15 (EC 3.1.2.15);cDNA FLJ13641 fis, clone PLACE1011229, highly similar to Homo sapiens ubiquitin-specific protease homolog (UPH…	9.0683e-58		2.9112					1.5351	1.2934
AEGILLLVK	954.611	IPI00296909	Poly [ADP-ribose] polymerase 4;Vault poly(ADP-ribose) polymerase;193 kDa vault protein;PARP-related/IalphaI-related H5/proline-rich;PARP4 protein;cDNA FLJ61556, highly similar to Poly (ADP-ribose) polymerase 4 (EC 2.4.2.30);Poly (ADP-ribose) polymerase family, member 4	0.0012138	0.28591		0.37977					0.1083	0.11377
AEGKEGEEATAEAEEK	1676.74	IPI00031023	Protein flightless-1 homolog;cDNA FLJ50778, highly similar to Protein flightless-1 homolog;cDNA FLJ51784, highly similar to Protein flightless-1 homolog;Flightless I homolog variant;cDNA FLJ50164, highly similar to Protein flightless-1 homolog	0.020383									0.21543
AEGKLSNSNSKDGNMQTAK	1978.94	IPI00029081	DNA ligase 3;DNA ligase III;Polydeoxyribonucleotide synthase [ATP] 3;DNA ligase;Ligase III, DNA, ATP-dependent;LIG3 protein	0.28776
AEGLGDGYR	936.43	IPI00000335	Histidine triad nucleotide-binding protein 2;HINT-3;HIT-17kDa;PKCI-1-related HIT protein;PKCI-1-related HIT protein variant;Histidine triad nucleotide binding protein 2;Histidine triad nucleotide binding protein 2, isoform CRA_b;Protein kinase C inhibitor-2	0.00011104		0.67197	0.60508	0.74432		0.57108	1.8354	0.44677	1.4639
AEGLHQLEADHSR	1461.7	IPI00012213	Caspase recruitment domain-containing protein 14;CARD-containing MAGUK protein 2;CARD14 isoform 3	0.68863			1.0824			0.089483
AEGNPKPEIIWLR	1521.83	IPI00016112	Peroxidasin homolog;Vascular peroxidase 1;Melanoma-associated antigen MG50;p53-responsive gene 2 protein	8.0677e-05			0.25171
AEGPDVAVDLPK	1209.62	IPI00021812	Neuroblast differentiation-associated protein AHNAK;Desmoyokin;cDNA FLJ57801, highly similar to Homo sapiens AHNAK nucleoprotein (desmoyokin) (AHNAK), transcript variant 1, mRNA;AHNAK-related protein;cDNA FLJ46846 fis, clone UTERU3004635, moderately similar to Neuroblast differentiation associated protein AHNAK;cDNA FLJ33834 fis, clone CTONG2004264, moderately similar to NEUROBLAST DIFFERENTIATIO…	1.9337e-34	0.43286	0.63428	0.32495	0.57495	0.64952		0.23215	0.22152	0.15008
AEGPEVDVNLPK	1266.65	IPI00021812	Neuroblast differentiation-associated protein AHNAK;Desmoyokin;cDNA FLJ57801, highly similar to Homo sapiens AHNAK nucleoprotein (desmoyokin) (AHNAK), transcript variant 1, mRNA;AHNAK-related protein;cDNA FLJ46846 fis, clone UTERU3004635, moderately similar to Neuroblast differentiation associated protein AHNAK;cDNA FLJ33834 fis, clone CTONG2004264, moderately similar to NEUROBLAST DIFFERENTIATIO…	2.2374e-27	0.39698	0.60405	0.25813	0.71036	0.74969	0.4438	0.20618	0.20916	0.13833
AEGPGLSR	785.403	IPI00333541	Filamin-A;Alpha-filamin;Filamin-1;Endothelial actin-binding protein;Actin-binding protein 280;Non-muscle filamin;Filamin A, alpha (Actin binding protein 280);Filamin A, alpha (Actin binding protein 280), isoform CRA_b;Filamin A;Filamin A, alpha (Actin binding protein 280), isoform CRA_c;FLNA protein;FLJ00119 protein;Putative uncharacterized protein FLNA;cDNA FLJ57038, highly similar to Filamin-A;…	0.0040364		0.56242						0.28412	0.20599
AEGPGRGDEPSPS	1254.55	IPI00295992	ATPase family AAA domain-containing protein 3A;cDNA FLJ31537 fis, clone NT2RI2000704, highly similar to ATPase family AAA domain-containing protein 3A;ATPase family, AAA domain containing 3A	0.00049402				0.46853		0.58238			0.5012
AEGPSGSPAAAFSHCVCVR	1958.87	IPI00015505	Hermansky-Pudlak syndrome 6 protein;Ruby-eye protein homolog;Hermansky-Pudlak syndrome 6;Hermansky-Pudlak syndrome 6, isoform CRA_b	0.00034495									0.60099
AEGPSREETWVPVFTQR	1987.98	IPI00008714	Annexin A9;Annexin-9;Annexin-31;Annexin XXXI;Pemphaxin	0.91637					0.82304
AEGQAHQPNFTFR	1501.71	IPI00847568	RISC-loading complex subunit TARBP2;TAR RNA-binding protein 2;Trans-activation-responsive RNA-binding protein;cDNA FLJ75669, highly similar to Homo sapiens TAR (HIV) RNA binding protein 2 (TARBP2), transcript variant 1, mRNA;cDNA FLJ56658, moderately similar to TAR RNA-binding protein 2	0.026622			1.4141				1.1979		1.4584
AEGQLQASPPGAAEGHLEK	1888.93	IPI00291016	NADH dehydrogenase (Ubiquinone) flavoprotein 3, 10kDa;cDNA FLJ31479 fis, clone NT2NE2001634, moderately similar to NADH-UBIQUINONE OXIDOREDUCTASE 9 KD SUBUNIT (EC 1.6.5.3)	0.0057536					0.49926
AEGQLQASPPGAAEGHLEKPVPEPQR	2692.36	IPI00291016	NADH dehydrogenase (Ubiquinone) flavoprotein 3, 10kDa;cDNA FLJ31479 fis, clone NT2NE2001634, moderately similar to NADH-UBIQUINONE OXIDOREDUCTASE 9 KD SUBUNIT (EC 1.6.5.3)	4.3487e-17									0.5471
AEGQLQASPPGAAEGHLEKPVPEPQRK	2820.45	IPI00291016	NADH dehydrogenase (Ubiquinone) flavoprotein 3, 10kDa;cDNA FLJ31479 fis, clone NT2NE2001634, moderately similar to NADH-UBIQUINONE OXIDOREDUCTASE 9 KD SUBUNIT (EC 1.6.5.3)	0.0041268	1.0766	1.2509		0.7328
AEGSAVSDPQHAAR	1394.65	IPI00022758	Gigaxonin;Kelch-like protein 16;cDNA FLJ38059 fis, clone CTONG2014946, highly similar to Gigaxonin	6.1819e-77		1.4422				1.9299	1.4831
AEGSDVANAVLDGADCIMLSGETAK	2493.14	IPI00479186	Pyruvate kinase isozymes M1/M2;Pyruvate kinase muscle isozyme;Pyruvate kinase 2/3;Cytosolic thyroid hormone-binding protein;THBP1;p58;M2-PK;Tumor M2-PK;Pyruvate kinase;Pyruvate kinase M2	1.4411e-68	0.67229	0.84117	0.78936			1.9055		0.31477
AEGSDVANAVLDGADCIMLSGETAKGDYPLEAVR	3493.63	IPI00479186	Pyruvate kinase isozymes M1/M2;Pyruvate kinase muscle isozyme;Pyruvate kinase 2/3;Cytosolic thyroid hormone-binding protein;THBP1;p58;M2-PK;Tumor M2-PK;Pyruvate kinase;Pyruvate kinase M2	3.3736e-134			0.76632			1.9238
AEGSEAAELAEIYAK	1550.75	IPI00465160	ATP-binding cassette sub-family F member 3;cDNA FLJ57179, highly similar to Homo sapiens ATP-binding cassette, sub-family F (GCN20), member 3 (ABCF3), mRNA	2.8111e-35	0.83854								0.98663
AEGSEIR	760.372	IPI00010796	Protein disulfide-isomerase;Prolyl 4-hydroxylase subunit beta;Cellular thyroid hormone-binding protein;p55;Procollagen-proline, 2-oxoglutarate 4-dioxygenase (Proline 4-hydroxylase), beta polypeptide, isoform CRA_a;cDNA, FLJ96716, Homo sapiens procollagen-proline, 2-oxoglutarate 4-dioxygenase(proline 4-hydroxylase), beta polypeptide (protein disulfideisomerase; thyroid hormone binding protein p55)…	0.087905		0.85002		0.81571					0.42577
AEGSSTASSGSQLAEGK	1565.72	IPI00384265	Constitutive coactivator of PPAR-gamma-like protein 1;Oxidative stress-associated Src activator;Protein FAM120A;Putative uncharacterized protein FAM120A	1.6781e-12		1.2987	1.1706			1.4987		1.3814	1.6136
AEGTAPLHIFPR	1307.7	IPI00014925	ATP-dependent DNA helicase Q4;RecQ protein-like 4;RTS	0.037285									6.5099
AEGTVNEGRPESDAADHTGPK	2136.97	IPI00061492	Uncharacterized protein C7orf30;Chromosome 7 open reading frame 30;cDNA FLJ45842 fis, clone NTONG2009468;cDNA, FLJ92099	0.0045393	1.0566		1.2284						1.3909
AEHASSLLELASTTK	1556.8	IPI00746934	E3 ubiquitin-protein ligase UBR4;N-recognin-4;Zinc finger UBR1-type protein 1;Retinoblastoma-associated factor of 600 kDa;600 kDa retinoblastoma protein-associated factor;RBAF600;p600;Putative uncharacterized protein UBR4	0.097163		0.96522					0.88978		0.34572
AEHDQLLLNYAK	1413.73	IPI00217975	Lamin-B1;Lamin B1, isoform CRA_b;cDNA, FLJ92980, Homo sapiens lamin B1 (LMNB1), mRNA;cDNA FLJ50934, highly similar to Lamin-B1;LMNB1 protein	8.1906e-14	1.2484	0.27773	4.4492		0.22231		0.57648	1.1311	2.6511
AEHDSILAEK	1111.55	IPI00329633	Threonyl-tRNA synthetase, cytoplasmic;Threonine--tRNA ligase;cDNA FLJ75173, highly similar to Homo sapiens threonyl-tRNA synthetase, mRNA;Threonyl-tRNA synthetase, isoform CRA_b;cDNA, FLJ96812, highly similar to Homo sapiens threonyl-tRNA synthetase (TARS), mRNA;cDNA FLJ38533 fis, clone HCHON2001108, highly similar to Threonyl-tRNA synthetase, cytoplasmic (EC 6.1.1.3);TARS protein;cDNA FLJ53464, …	7.5749e-23			0.71758			0.668	0.63444	0.4008	0.63935
AEHDSILAEKAEK	1439.73	IPI00329633	Threonyl-tRNA synthetase, cytoplasmic;Threonine--tRNA ligase;cDNA FLJ75173, highly similar to Homo sapiens threonyl-tRNA synthetase, mRNA;Threonyl-tRNA synthetase, isoform CRA_b;cDNA, FLJ96812, highly similar to Homo sapiens threonyl-tRNA synthetase (TARS), mRNA;cDNA FLJ38533 fis, clone HCHON2001108, highly similar to Threonyl-tRNA synthetase, cytoplasmic (EC 6.1.1.3);TARS protein;cDNA FLJ53464, …	1.2376e-11									0.40152
AEHHGLAGHLAEALAGQGPAAGLEMLEEK	2906.43	IPI00465074	Kinesin light chain 3;kinesin light chain 2;KLC2-like	0.97527							0.075684
AEHIPSGPLR	1075.58	IPI00941970	BAT2 domain-containing protein 1;HBxAg transactivated protein 2;cDNA FLJ54637, highly similar to Homo sapiens BAT2 domain containing 1 (BAT2D1), mRNA;cDNA FLJ52084, highly similar to Homo sapiens BAT2 domain containing 1 (BAT2D1), mRNA;Putative uncharacterized protein BAT2D1	1.0082e-05	0.59568
AEHLDHVMFR	1253.6	IPI00941001	Phosphoacetylglucosamine mutase;Acetylglucosamine phosphomutase;N-acetylglucosamine-phosphate mutase;Phosphoglucomutase 3;Phosphoglucomutase 3, isoform CRA_d;cDNA, FLJ95330, Homo sapiens phosphoglucomutase 3 (PGM3), mRNA;cDNA FLJ13370 fis, clone PLACE1000653, highly similar to Phosphoacetylglucosamine mutase (EC 5.4.2.3);cDNA FLJ55543, highly similar to Phosphoacetylglucosamine mutase (EC 5.4.2.3)	1.1689e-09	0.93374	1.1255	0.81222		0.47087	0.41937	1.0251		0.76413
AEHQQDSEDLFKK	1573.74	IPI00295940	cDNA FLJ55508, highly similar to Sad1/unc-84-like protein 2;UNC84B protein;cDNA FLJ75032, highly similar to Homo sapiens unc-84 homolog B (C. elegans) (UNC84B), mRNA;Unc-84 homolog B (C. elegans);Protein unc-84 homolog B;Sad1/unc-84 protein-like 2;Rab5-interacting protein;cDNA FLJ59542, highly similar to Sad1/unc-84-like protein 2	4.8196e-06			0.13553						0.30404
AEHSGTVLYSLVK	1402.75	IPI00031411	Protocadherin Fat 1;Cadherin-related tumor suppressor homolog;Protein fat homolog;Cadherin	0.093726	0.25138			0.34526		0.50152			0.27286
AEHTPMAPGGSTHR	1447.66	IPI00795611	cDNA FLJ59232, highly similar to ARF GTPase-activating protein GIT1;cDNA FLJ58515, highly similar to ARF GTPase-activating protein GIT1;cDNA FLJ60869, highly similar to ARF GTPase-activating protein GIT1;G protein-coupled receptor kinase interactor 1 variant;ARF GTPase-activating protein GIT1;G protein-coupled receptor kinase-interactor 1;GRK-interacting protein 1;Cool-associated and tyrosine-pho…	0.6461									0.38782
AEHVVVPIVAFNK	1421.8	IPI00436705	MORC family CW-type zinc finger 3;MORC family CW-type zinc finger protein 3;Zinc finger CW-type coiled-coil domain protein 3;MORC3 protein;cDNA FLJ57931, highly similar to MORC family CW-type zinc finger 3	0.00049402	0.55107	0.65353	0.89095	0.9378	0.7797	0.99325			1.3563
AEIDLVCELAK	1259.64	IPI00291646	MTHFD1L protein;Methylenetetrahydrofolate dehydrogenase (NADP+ dependent) 1-like;Monofunctional C1-tetrahydrofolate synthase, mitochondrial;Formyltetrahydrofolate synthetase;cDNA, FLJ96424	0.00032915						3.7934
AEIDMLDIR	1074.54	IPI00793199	Proliferation-inducing protein 28;ANXA4 protein;Annexin A4;Putative uncharacterized protein ANXA4;cDNA, FLJ96576, Homo sapiens annexin A4 (ANXA4), mRNA;Annexin-4;Annexin IV;Lipocortin IV;Endonexin I;Chromobindin-4;Protein II;P32.5;Placental anticoagulant protein II;PP4-X;35-beta calcimedin;Carbohydrate-binding protein p33/p41;cDNA FLJ52218, highly similar to Annexin A4;cDNA FLJ51794, highly simil…	4.5937e-05	0.56137	0.5827	0.45697		1.1256	0.79217	0.70735	0.43251	0.39379
AEIDNVKK	915.503	CON_00009867	Keratin, type II cytoskeletal 5;Cytokeratin-5;Keratin-5;58 kDa cytokeratin;cDNA FLJ59922, highly similar to Keratin, type II cytoskeletal 5;cDNA FLJ54081, highly similar to Keratin, type II cytoskeletal 5	0.037938
AEIGIAMGSGTAVAK	1374.72	IPI00219078	Sarcoplasmic/endoplasmic reticulum calcium ATPase 1;Calcium pump 1;Calcium-transporting ATPase sarcoplasmic reticulum type, fast twitch skeletal muscle isoform;SR Ca(2+)-ATPase 1;Endoplasmic reticulum class 1/2 Ca(2+) ATPase;Putative uncharacterized protein DKFZp779G2251;Putative uncharacterized protein DKFZp779O2152;Similar to ATPase, Ca++ transporting, cardiac muscle, fast twitch 1;cDNA FLJ3537…	8.1065e-77	0.9034		0.9193	0.50323	0.19141	0.66752	2.1495		0.5137
AEIHAQPSDK	1094.54	IPI00216225	Integrin alpha-6;VLA-6;CD49 antigen-like family member F;Integrin alpha-6 heavy chain;Integrin alpha-6 light chain;Platelet glycoprotein GPIC;Putative uncharacterized protein ITGA6	0.3745
AEIHDLQEEHIK	1460.73	IPI00004533	Kinesin-like protein KIF3B;Microtubule plus end-directed kinesin motor 3B;HH0048;Kinesin family member 3B;Kinesin family member 3B, isoform CRA_a;cDNA FLJ61470, highly similar to Kinesin-like protein KIF3B;cDNA FLJ55620, highly similar to Kinesin-like protein KIF3B	0.0003834					1.6966
AEIHDLQEEHIKER	1745.87	IPI00004533	Kinesin-like protein KIF3B;Microtubule plus end-directed kinesin motor 3B;HH0048;Kinesin family member 3B;Kinesin family member 3B, isoform CRA_a;cDNA FLJ61470, highly similar to Kinesin-like protein KIF3B;cDNA FLJ55620, highly similar to Kinesin-like protein KIF3B	0.0082927									1.1007
AEIIADK	758.417	IPI00011913	Heterogeneous nuclear ribonucleoprotein A0;HNRPA0 protein	0.66426		0.93708		1.1423
AEIIDQDLYER	1363.66	IPI00010951	Epiplakin;450 kDa epidermal antigen;Putative uncharacterized protein DKFZp434G0719	2.1196e-14	0.62706				2.1968	4.0906	2.4976	3.28
AEIIHHLADLLTDQR	1743.93	IPI00008982	Delta-1-pyrroline-5-carboxylate synthetase;Aldehyde dehydrogenase family 18 member A1;Glutamate 5-kinase;Gamma-glutamyl kinase;Gamma-glutamyl phosphate reductase;Glutamate-5-semialdehyde dehydrogenase;Glutamyl-gamma-semialdehyde dehydrogenase	0.097163	1.6494	1.7164							1.4891
AEIIHHLADLLTDQRDEILLANK	2640.42	IPI00008982	Delta-1-pyrroline-5-carboxylate synthetase;Aldehyde dehydrogenase family 18 member A1;Glutamate 5-kinase;Gamma-glutamyl kinase;Gamma-glutamyl phosphate reductase;Glutamate-5-semialdehyde dehydrogenase;Glutamyl-gamma-semialdehyde dehydrogenase	4.3735e-11		3.7415					1.3301	1.6858
AEIIHHLADLLTDQRDEILLANKK	2768.52	IPI00008982	Delta-1-pyrroline-5-carboxylate synthetase;Aldehyde dehydrogenase family 18 member A1;Glutamate 5-kinase;Gamma-glutamyl kinase;Gamma-glutamyl phosphate reductase;Glutamate-5-semialdehyde dehydrogenase;Glutamyl-gamma-semialdehyde dehydrogenase	8.1781e-11		5.2567			0.72125
AEIIKLK	813.532	IPI00910791	cDNA FLJ60613, highly similar to Mus musculus FCH and double SH3 domains 2 (Fchsd2), mRNA;FCH and double SH3 domains protein 2;SH3 multiple domains protein 3;Carom	0.098046
AEIILLK	798.521	IPI00216106	Obg-like ATPase 1;GTP-binding protein 9	6.2538e-06								3.4551	4.3492
AEIISLCK	932.5	IPI00375144	Serrate RNA effector molecule homolog;Arsenite-resistance protein 2;SRRT protein;Arsenate resistance protein ARS2;cDNA FLJ60599, highly similar to Arsenite-resistance protein 2;cDNA FLJ60199, highly similar to Arsenite-resistance protein 2;Arsenite-resistant protein ASR2	1.566e-05			1.1906	1.0222		1.0154	1.5639	1.5233	1.4404
AEIITVSDGR	1059.56	IPI00031655	Vacuolar protein-sorting-associated protein 25;ESCRT-II complex subunit VPS25;ELL-associated protein of 20 kDa;Dermal papilla-derived protein 9;Vacuolar protein sorting 25 (Yeast), isoform CRA_a;cDNA, FLJ92373	0.051346	1.9445			0.69878	0.77783
[truncated: 72,585 more rows]
